# Supplementary material
Source: publisher figshare collection journal article supplement (https://acs.figshare.com/ndownloader/files/5636724)
Supplement: Supplementary file 1 [file 5636724]

data_fhrg50
_audit_creation_date              2015-11-19
_audit_creation_method
;
Olex2 1.2
(compiled 2015.09.30 svn.r3233 for OlexSys, GUI svn.r5103)
;
_publ_contact_author_address      ?
_publ_contact_author_email        ?
_publ_contact_author_name         ''
_publ_contact_author_phone        ?
_publ_section_references
;
Burla, M.C., Caliandro, R., Camalli, M., Carrozzini, B., Cascarano, G.L.,
 De Caro, L., Giacovazzo, C., Polidori, G., Siliqi, D., Spagna, R.
 (2007). J. Appl. Cryst. 40, 609-613.

Dolomanov, O.V., Bourhis, L.J., Gildea, R.J, Howard, J.A.K. & Puschmann, H.
 (2009), J. Appl. Cryst. 42, 339-341.

Sheldrick, G.M. (2015). Acta Cryst. C71, 3-8.
;
_chemical_name_common             ?
_chemical_name_systematic         ?
_chemical_formula_moiety          '0.25(Co16 K41.6 O352 P8 W80 Yb4)'
_chemical_formula_sum             'Co4 K10.40 O88 P2 W20 Yb'
_chemical_formula_weight          5962.34
_chemical_absolute_configuration  ?
_chemical_melting_point           ?
_chemical_oxdiff_formula          'Yb Co4 P2 W20 K11 O100'
_chemical_oxdiff_usercomment      '28 AUG 2015'
loop_
  _atom_type_symbol
  _atom_type_description
  _atom_type_scat_dispersion_real
  _atom_type_scat_dispersion_imag
  _atom_type_scat_source
 'Co' 'Co' 0.3494 0.9721 'International Tables Vol C Tables 4.2.6.8 and 6.1.1.4'
 'K' 'K' 0.2009 0.2494 'International Tables Vol C Tables 4.2.6.8 and 6.1.1.4'
 'O' 'O' 0.0106 0.0060 'International Tables Vol C Tables 4.2.6.8 and 6.1.1.4'
 'P' 'P' 0.1023 0.0942 'International Tables Vol C Tables 4.2.6.8 and 6.1.1.4'
 'W' 'W' -0.8490 6.8722 'International Tables Vol C Tables 4.2.6.8 and 6.1.1.4'
 'Yb' 'Yb' -0.3850 5.5486
 'International Tables Vol C Tables 4.2.6.8 and 6.1.1.4'

_shelx_space_group_comment
;
The symmetry employed for this shelxl refinement is uniquely defined
by the following loop, which should always be used as a source of
symmetry information in preference to the above space-group names.
They are only intended as comments.
;
_space_group_crystal_system       'orthorhombic'
_space_group_IT_number            45
_space_group_name_H-M_alt         'I b a 2'
_space_group_name_Hall            'I 2 -2c'
loop_
  _space_group_symop_operation_xyz
 'x, y, z'
 '-x, -y, z'
 '-x, y, z+1/2'
 'x, -y, z+1/2'
 'x+1/2, y+1/2, z+1/2'
 '-x+1/2, -y+1/2, z+1/2'
 '-x+1/2, y+1/2, z+1'
 'x+1/2, -y+1/2, z+1'

_cell_length_a                    27.2067(8)
_cell_length_b                    19.7189(5)
_cell_length_c                    18.6379(5)
_cell_angle_alpha                 90
_cell_angle_beta                  90
_cell_angle_gamma                 90
_cell_volume                      9999.0(5)
_cell_formula_units_Z             4
_cell_measurement_reflns_used     14111
_cell_measurement_temperature     298(2)
_cell_measurement_theta_max       28.9200
_cell_measurement_theta_min       2.9870
_shelx_estimated_absorpt_T_max    ?
_shelx_estimated_absorpt_T_min    ?
_exptl_absorpt_coefficient_mu     25.032
_exptl_absorpt_correction_T_max   1.00000
_exptl_absorpt_correction_T_min   0.09477
_exptl_absorpt_correction_type    multi-scan
_exptl_absorpt_process_details
;
CrysAlisPro, Agilent Technologies,
Version 1.171.36.32 (release 02-08-2013 CrysAlis171 .NET)
(compiled Aug  2 2013,16:46:58)
Empirical absorption correction using spherical harmonics,
 implemented in SCALE3 ABSPACK scaling algorithm.
;
_exptl_absorpt_special_details    ?
_exptl_crystal_colour             'red'
_exptl_crystal_density_diffrn     3.961
_exptl_crystal_density_meas       ?
_exptl_crystal_density_method     ?
_exptl_crystal_description        'needle'
_exptl_crystal_F_000              10358
_exptl_crystal_size_max           0.13
_exptl_crystal_size_mid           0.06
_exptl_crystal_size_min           0.04
_exptl_transmission_factor_max    ?
_exptl_transmission_factor_min    ?
_diffrn_reflns_av_R_equivalents   0.0822
_diffrn_reflns_av_unetI/netI      0.0689
_diffrn_reflns_Laue_measured_fraction_full 0.998
_diffrn_reflns_Laue_measured_fraction_max 0.948
_diffrn_reflns_limit_h_max        35
_diffrn_reflns_limit_h_min        -35
_diffrn_reflns_limit_k_max        26
_diffrn_reflns_limit_k_min        -25
_diffrn_reflns_limit_l_max        25
_diffrn_reflns_limit_l_min        -24
_diffrn_reflns_number             69406
_diffrn_reflns_point_group_measured_fraction_full 0.998
_diffrn_reflns_point_group_measured_fraction_max 0.949
_diffrn_reflns_theta_full         26.000
_diffrn_reflns_theta_max          29.412
_diffrn_reflns_theta_min          3.008
_diffrn_ambient_temperature       298.15
_diffrn_detector_area_resol_mean  15.9853
_diffrn_measured_fraction_theta_full 0.998
_diffrn_measured_fraction_theta_max 0.948
_diffrn_measurement_details
;
#__ type_ start__ end____ width___ exp.time_
  1 omega    2.00   89.00   1.0000   11.5000
omega____ theta____ kappa____ phi______ frames
    -       20.3921   57.0000  -60.0000 87

#__ type_ start__ end____ width___ exp.time_
  2 omega  -47.00   39.00   1.0000   11.5000
omega____ theta____ kappa____ phi______ frames
    -       20.3921  -57.0000  -60.0000 86

#__ type_ start__ end____ width___ exp.time_
  3 omega  -25.00   60.00   1.0000   11.5000
omega____ theta____ kappa____ phi______ frames
    -       20.3921  -99.0000  150.0000 85

#__ type_ start__ end____ width___ exp.time_
  4 omega    6.00   89.00   1.0000   11.5000
omega____ theta____ kappa____ phi______ frames
    -       20.3921   57.0000   30.0000 83

#__ type_ start__ end____ width___ exp.time_
  5 omega  -23.00   62.00   1.0000   11.5000
omega____ theta____ kappa____ phi______ frames
    -       20.3921  -99.0000   60.0000 85

#__ type_ start__ end____ width___ exp.time_
  6 omega    4.00   73.00   1.0000   11.5000
omega____ theta____ kappa____ phi______ frames
    -       20.3921   57.0000  120.0000 69

#__ type_ start__ end____ width___ exp.time_
  7 omega  -25.00   62.00   1.0000   11.5000
omega____ theta____ kappa____ phi______ frames
    -       20.3921  -99.0000 -120.0000 87

#__ type_ start__ end____ width___ exp.time_
  8 omega    2.00   89.00   1.0000   11.5000
omega____ theta____ kappa____ phi______ frames
    -       20.3921   57.0000 -150.0000 87
;
_diffrn_measurement_device_type   'Xcalibur, Sapphire3'
_diffrn_measurement_method        '\w scans'
_diffrn_orient_matrix_UB_11       -0.0209086000
_diffrn_orient_matrix_UB_12       -0.0165473000
_diffrn_orient_matrix_UB_13       -0.0145238000
_diffrn_orient_matrix_UB_21       -0.0100724000
_diffrn_orient_matrix_UB_22       0.0318666000
_diffrn_orient_matrix_UB_23       -0.0098163000
_diffrn_orient_matrix_UB_31       0.0119172000
_diffrn_orient_matrix_UB_32       -0.0021398000
_diffrn_orient_matrix_UB_33       -0.0337520000
_diffrn_radiation_monochromator   graphite
_diffrn_radiation_type            MoK\a
_diffrn_radiation_wavelength      0.71073
_diffrn_source                    'Enhance (Mo) X-ray Source'
_reflns_Friedel_coverage          0.943
_reflns_Friedel_fraction_full     0.999
_reflns_Friedel_fraction_max      0.950
_reflns_number_gt                 10301
_reflns_number_total              12643
_reflns_odcompleteness_completeness 99.75
_reflns_odcompleteness_iscentric  1
_reflns_odcompleteness_theta      26.32
_reflns_special_details
;
 Reflections were merged by SHELXL according to the crystal
 class for the calculation of statistics and refinement.
 
 _reflns_Friedel_fraction is defined as the number of unique
 Friedel pairs measured divided by the number that would be
 possible theoretically, ignoring centric projections and
 systematic absences.
;
_reflns_threshold_expression      'I > 2\s(I)'
_computing_cell_refinement
;
CrysAlisPro, Agilent Technologies,
Version 1.171.36.32 (release 02-08-2013 CrysAlis171 .NET)
(compiled Aug  2 2013,16:46:58)
;
_computing_data_collection
;
CrysAlisPro, Agilent Technologies,
Version 1.171.36.32 (release 02-08-2013 CrysAlis171 .NET)
(compiled Aug  2 2013,16:46:58)
;
_computing_data_reduction
;
CrysAlisPro, Agilent Technologies,
Version 1.171.36.32 (release 02-08-2013 CrysAlis171 .NET)
(compiled Aug  2 2013,16:46:58)
;
_computing_molecular_graphics     'Olex2 (Dolomanov et al., 2009)'
_computing_publication_material   'Olex2 (Dolomanov et al., 2009)'
_computing_structure_refinement   'ShelXL (Sheldrick, 2015)'
_computing_structure_solution     'SIR2004 (Burla et al., 2007)'
_refine_diff_density_max          3.608
_refine_diff_density_min          -2.104
_refine_diff_density_rms          0.410
_refine_ls_abs_structure_details
;
 Refined as an inversion twin.
;
_refine_ls_abs_structure_Flack    0.13(2)
_refine_ls_extinction_coef        .
_refine_ls_extinction_method      none
_refine_ls_goodness_of_fit_ref    1.043
_refine_ls_hydrogen_treatment     undef
_refine_ls_matrix_type            full
_refine_ls_number_parameters      349
_refine_ls_number_reflns          12643
_refine_ls_number_restraints      1
_refine_ls_R_factor_all           0.0733
_refine_ls_R_factor_gt            0.0523
_refine_ls_restrained_S_all       1.043
_refine_ls_shift/su_max           0.001
_refine_ls_shift/su_mean          0.000
_refine_ls_structure_factor_coef  Fsqd
_refine_ls_weighting_details
'w=1/[\s^2^(Fo^2^)+(0.0495P)^2^+433.8407P] where P=(Fo^2^+2Fc^2^)/3'
_refine_ls_weighting_scheme       calc
_refine_ls_wR_factor_gt           0.1135
_refine_ls_wR_factor_ref          0.1291
_refine_special_details
;
 Refined as a 2-component inversion twin.
;
_olex2_refinement_description
;
1. Twinned data refinement
 Scales: 0.87(2) 0.13(2)
2. Others
 Fixed Sof: K3(0.6) K5(0.6)
;
_atom_sites_solution_hydrogens    .
_atom_sites_solution_primary      ?
_atom_sites_solution_secondary    ?
loop_
  _atom_site_label
  _atom_site_type_symbol
  _atom_site_fract_x
  _atom_site_fract_y
  _atom_site_fract_z
  _atom_site_U_iso_or_equiv
  _atom_site_adp_type
  _atom_site_occupancy
  _atom_site_site_symmetry_order
  _atom_site_calc_flag
  _atom_site_refinement_flags_posn
  _atom_site_refinement_flags_adp
  _atom_site_refinement_flags_occupancy
  _atom_site_disorder_assembly
  _atom_site_disorder_group
 Co1 Co -0.08230(13) 0.44944(19) 0.68979(19) 0.0261(7) Uani 1 1 d . . . . .
 Co2 Co -0.03933(14) 0.38775(18) 0.94099(19) 0.0274(8) Uani 1 1 d . . . . .
 K1 K -0.1813(4) 0.5801(5) 1.0473(5) 0.073(3) Uani 1 1 d . . . . .
 K2 K -0.2832(4) 0.6038(7) 0.6122(8) 0.098(4) Uani 1 1 d . . . . .
 K3 K 0.1501(6) 0.3857(10) 0.7149(8) 0.082(6) Uani 0.6 1 d . . . . .
 K4 K 0.0593(6) 0.2544(9) 0.5879(6) 0.115(5) Uani 1 1 d . . . . .
 K5 K -0.0813(6) 0.7117(9) 0.9144(9) 0.074(4) Uiso 0.6 1 d . . . . .
 K6 K -0.2269(6) 0.6362(8) 0.8280(9) 0.130(6) Uani 1 1 d . . . . .
 O1 O -0.0774(8) 0.2487(12) 0.5576(13) 0.049(6) Uiso 1 1 d . . . . .
 O2 O -0.2536(8) 0.2472(12) 0.6291(12) 0.046(5) Uiso 1 1 d . . . . .
 O3 O -0.1373(9) 0.0865(13) 0.7260(14) 0.056(6) Uiso 1 1 d . . . . .
 O4 O -0.1577(7) 0.2971(10) 0.6448(10) 0.032(4) Uiso 1 1 d . . . . .
 O5 O -0.0966(7) 0.2111(9) 0.6983(10) 0.032(4) Uiso 1 1 d . . . . .
 O6 O -0.1881(7) 0.2072(10) 0.7358(11) 0.035(4) Uiso 1 1 d . . . . .
 O7 O -0.0205(7) 0.2939(10) 0.6722(10) 0.033(4) Uiso 1 1 d . . . . .
 O8 O -0.0712(7) 0.1462(10) 0.8188(11) 0.036(5) Uiso 1 1 d . . . . .
 O9 O -0.1649(7) 0.1455(10) 0.8559(10) 0.033(4) Uiso 1 1 d . . . . .
 O10 O -0.2607(8) 0.2845(10) 0.7737(11) 0.039(5) Uiso 1 1 d . . . . .
 O11 O -0.2320(7) 0.3776(10) 0.6808(10) 0.036(5) Uiso 1 1 d . . . . .
 O12 O -0.0841(8) 0.3807(12) 0.6086(12) 0.043(5) Uiso 1 1 d . . . . .
 O13 O 0.0641(7) 0.3278(10) 0.7473(10) 0.035(5) Uiso 1 1 d . . . . .
 O14 O -0.0142(7) 0.2568(9) 0.8097(10) 0.030(4) Uiso 1 1 d . . . . .
 O15 O 0.0038(8) 0.1599(11) 0.9211(11) 0.040(5) Uiso 1 1 d . . . . .
 O16 O -0.0968(8) 0.1823(11) 0.9500(11) 0.040(5) Uiso 1 1 d . . . . .
 O17 O -0.1925(8) 0.1581(11) 1.0015(12) 0.045(5) Uiso 1 1 d . . . . .
 O18 O -0.2187(7) 0.2526(10) 0.8951(10) 0.034(4) Uiso 1 1 d . . . . .
 O19 O -0.3055(9) 0.3255(14) 0.9040(14) 0.056(6) Uiso 1 1 d . . . . .
 O20 O -0.2583(7) 0.4147(10) 0.8121(11) 0.036(4) Uiso 1 1 d . . . . .
 O21 O -0.2450(9) 0.5188(12) 0.7125(12) 0.049(6) Uiso 1 1 d . . . . .
 O22 O -0.1561(7) 0.4616(10) 0.6847(11) 0.036(5) Uiso 1 1 d . . . . .
 O23 O -0.0617(9) 0.5337(12) 0.6303(12) 0.049(6) Uiso 1 1 d . . . . .
 O24 O -0.0092(7) 0.4248(9) 0.7171(9) 0.028(4) Uiso 1 1 d . . . . .
 O25 O -0.0872(6) 0.3476(9) 0.7524(9) 0.023(4) Uiso 1 1 d . . . . .
 O26 O -0.1183(7) 0.2613(9) 0.8412(9) 0.028(4) Uiso 1 1 d . . . . .
 O27 O -0.1769(7) 0.3454(10) 0.7866(10) 0.030(4) Uiso 1 1 d . . . . .
 O28 O -0.1113(7) 0.3832(9) 0.8762(10) 0.028(4) Uiso 1 1 d . . . . .
 O29 O 0.0000(7) 0.3868(10) 0.8463(10) 0.029(4) Uiso 1 1 d . . . . .
 O30 O -0.0332(7) 0.2862(10) 0.9459(10) 0.033(4) Uiso 1 1 d . . . . .
 O31 O -0.1526(6) 0.2899(9) 0.9854(9) 0.027(4) Uiso 1 1 d . . . . .
 O32 O -0.2119(7) 0.3773(10) 0.9303(10) 0.030(4) Uiso 1 1 d . . . . .
 O33 O -0.1761(7) 0.4884(9) 0.8198(10) 0.029(4) Uiso 1 1 d . . . . .
 O34 O -0.0814(6) 0.5028(9) 0.7837(9) 0.024(4) Uiso 1 1 d . . . . .
 O35 O -0.0541(7) 0.4895(10) 0.9152(10) 0.031(4) Uiso 1 1 d . . . . .
 O36 O -0.0893(8) 0.3868(11) 1.0206(11) 0.042(5) Uiso 1 1 d . . . . .
 O37 O -0.1505(7) 0.4773(10) 0.9585(10) 0.034(4) Uiso 1 1 d . . . . .
 O38 O 0.0225(9) 0.4137(13) 0.9999(14) 0.055(6) Uiso 1 1 d . . . . .
 O39 O -0.1210(8) 0.5945(12) 0.8837(12) 0.045(5) Uiso 1 1 d . . . . .
 O40 O -0.1836(8) 0.4016(12) 1.0739(12) 0.045(5) Uiso 1 1 d . . . . .
 O41 O -0.2580(17) 0.536(2) 0.924(3) 0.136(16) Uiso 1 1 d . . . . .
 O42 O -0.1855(13) 0.6899(18) 0.9600(18) 0.088(10) Uiso 1 1 d . . . . .
 O43 O -0.1077(16) 0.805(2) 0.796(2) 0.126(15) Uiso 1 1 d . . . . .
 O44 O 0.1452(13) 0.244(2) 0.655(2) 0.096(10) Uiso 1 1 d . . . . .
 P1 P -0.1232(2) 0.3357(3) 0.8152(3) 0.0173(11) Uani 1 1 d . . . . .
 W1 W -0.08624(4) 0.29228(6) 0.63584(6) 0.0313(3) Uani 1 1 d . . . . .
 W2 W -0.21761(4) 0.28473(6) 0.69354(6) 0.0334(3) Uani 1 1 d . . . . .
 W3 W -0.12881(4) 0.16040(6) 0.76728(6) 0.0330(3) Uani 1 1 d . . . . .
 W4 W 0.00189(4) 0.34081(6) 0.75983(6) 0.0270(2) Uani 1 1 d . . . . .
 W5 W -0.04137(4) 0.21293(6) 0.89104(6) 0.0326(3) Uani 1 1 d . . . . .
 W6 W -0.16429(4) 0.20753(6) 0.93647(6) 0.0331(3) Uani 1 1 d . . . . .
 W7 W -0.25016(4) 0.33511(6) 0.86282(6) 0.0329(3) Uani 1 1 d . . . . .
 W8 W -0.20867(4) 0.45353(6) 0.73920(6) 0.0320(3) Uani 1 1 d . . . . .
 W9 W -0.11494(4) 0.50746(5) 0.87147(6) 0.0263(2) Uani 1 1 d . . . . .
 W10 W -0.15353(4) 0.38756(6) 0.99499(6) 0.0311(3) Uani 1 1 d . . . . .
 Yb1 Yb 0.0000 0.5000 0.81559(8) 0.0234(3) Uani 1 2 d S T P . .

loop_
  _atom_site_aniso_label
  _atom_site_aniso_U_11
  _atom_site_aniso_U_22
  _atom_site_aniso_U_33
  _atom_site_aniso_U_23
  _atom_site_aniso_U_13
  _atom_site_aniso_U_12
 Co1 0.0218(17) 0.033(2) 0.0234(17) 0.0009(14) -0.0001(14) -0.0036(14)
 Co2 0.035(2) 0.0253(19) 0.0215(17) -0.0007(14) 0.0004(15) -0.0058(15)
 K1 0.101(8) 0.065(6) 0.054(5) -0.011(4) 0.002(5) 0.017(5)
 K2 0.084(8) 0.090(9) 0.120(10) 0.019(7) 0.014(7) 0.025(6)
 K3 0.084(11) 0.120(15) 0.043(8) -0.023(8) 0.013(7) -0.065(11)
 K4 0.124(11) 0.149(13) 0.072(8) 0.004(8) 0.007(7) 0.051(10)
 K6 0.137(13) 0.119(12) 0.134(12) -0.004(10) 0.000(10) 0.064(10)
 P1 0.019(3) 0.013(3) 0.019(3) 0.005(2) 0.000(2) 0.002(2)
 W1 0.0320(6) 0.0367(7) 0.0252(5) -0.0048(5) 0.0019(4) -0.0064(5)
 W2 0.0271(6) 0.0394(7) 0.0336(6) -0.0007(5) -0.0053(5) -0.0084(5)
 W3 0.0361(6) 0.0262(6) 0.0367(6) -0.0034(5) -0.0017(5) -0.0079(5)
 W4 0.0218(5) 0.0277(6) 0.0315(5) -0.0047(4) 0.0010(4) -0.0010(4)
 W5 0.0340(6) 0.0250(6) 0.0389(6) 0.0026(5) -0.0061(5) -0.0017(5)
 W6 0.0369(6) 0.0287(6) 0.0337(6) 0.0040(5) -0.0014(5) -0.0106(5)
 W7 0.0235(5) 0.0365(6) 0.0388(6) 0.0009(5) 0.0035(5) -0.0079(4)
 W8 0.0210(5) 0.0359(6) 0.0392(6) 0.0061(5) -0.0019(4) -0.0012(4)
 W9 0.0235(5) 0.0242(5) 0.0312(5) -0.0012(4) 0.0050(4) -0.0022(4)
 W10 0.0344(6) 0.0341(6) 0.0249(5) -0.0034(4) 0.0056(5) -0.0092(5)
 Yb1 0.0217(7) 0.0255(8) 0.0231(7) 0.000 0.000 -0.0035(6)

_geom_special_details
;
 All esds (except the esd in the dihedral angle between two l.s. planes)
 are estimated using the full covariance matrix.  The cell esds are taken
 into account individually in the estimation of esds in distances, angles
 and torsion angles; correlations between esds in cell parameters are only
 used when they are defined by crystal symmetry.  An approximate (isotropic)
 treatment of cell esds is used for estimating esds involving l.s. planes.
;
loop_
  _geom_bond_atom_site_label_1
  _geom_bond_atom_site_label_2
  _geom_bond_distance
  _geom_bond_site_symmetry_2
  _geom_bond_publ_flag
 Co1 K1 3.827(11) 4_564 ?
 Co1 K3 3.77(2) 2_565 ?
 Co1 O12 2.03(2) . ?
 Co1 O22 2.02(2) . ?
 Co1 O23 2.08(2) . ?
 Co1 O24 2.110(18) . ?
 Co1 O25 2.326(17) . ?
 Co1 O34 2.042(17) . ?
 Co1 Yb1 3.392(4) . ?
 Co2 K4 3.834(15) 3 ?
 Co2 K5 3.856(18) 2_565 ?
 Co2 O28 2.303(18) . ?
 Co2 O29 2.064(18) . ?
 Co2 O30 2.01(2) . ?
 Co2 O35 2.10(2) . ?
 Co2 O36 2.01(2) . ?
 Co2 O38 2.07(2) . ?
 Co2 Yb1 3.392(4) . ?
 K1 Co1 3.827(11) 4_565 ?
 K1 O4 3.09(2) 4_565 ?
 K1 O11 2.96(2) 4_565 ?
 K1 O12 2.98(2) 4_565 ?
 K1 O22 2.77(2) 4_565 ?
 K1 O37 2.75(2) . ?
 K1 O41 3.22(5) . ?
 K1 O42 2.71(4) . ?
 K1 W1 3.967(11) 4_565 ?
 K1 W2 3.938(9) 4_565 ?
 K1 W8 3.713(10) 4_565 ?
 K1 W10 3.993(10) . ?
 K2 K1 4.722(17) 4_564 ?
 K2 K3 4.10(2) 2_565 ?
 K2 K6 4.35(2) . ?
 K2 O2 3.02(3) 7_454 ?
 K2 O3 3.05(3) 7_454 ?
 K2 O6 3.18(2) 7_454 ?
 K2 O21 2.72(3) . ?
 K2 O40 2.80(3) 4_564 ?
 K2 W2 3.878(14) 7_454 ?
 K2 W3 3.916(13) 7_454 ?
 K3 K6 3.00(2) 2_565 ?
 K3 O13 2.67(2) . ?
 K3 O21 3.20(3) 2_565 ?
 K3 O22 3.07(3) 2_565 ?
 K3 O23 3.29(3) 2_565 ?
 K3 O33 3.24(2) 2_565 ?
 K3 O34 3.16(3) 2_565 ?
 K3 O39 3.27(3) 2_565 ?
 K3 O40 2.80(3) 3_554 ?
 K3 O44 3.01(4) . ?
 K3 W8 3.577(15) 2_565 ?
 K3 W9 3.723(16) 2_565 ?
 K4 Co2 3.834(15) 3_554 ?
 K4 O7 2.79(2) . ?
 K4 O13 3.31(2) . ?
 K4 O16 3.11(2) 3_554 ?
 K4 O30 2.81(2) 3_554 ?
 K4 O31 3.25(2) 3_554 ?
 K4 O36 3.01(3) 3_554 ?
 K4 O44 2.66(4) . ?
 K4 W4 3.952(13) . ?
 K4 W5 3.790(13) 3_554 ?
 K4 W6 4.120(13) 3_554 ?
 K4 W10 4.058(18) 3_554 ?
 K5 O1 2.78(3) 4_565 ?
 K5 O13 3.24(3) 2_565 ?
 K5 O14 3.31(3) 2_565 ?
 K5 O15 3.30(3) 2_565 ?
 K5 O29 3.21(3) 2_565 ?
 K5 O30 3.17(3) 2_565 ?
 K5 O38 3.35(3) 2_565 ?
 K5 O39 2.61(3) . ?
 K5 O42 2.99(4) . ?
 K5 O43 2.95(5) . ?
 K5 W4 3.748(17) 2_565 ?
 K5 W5 3.680(17) 2_565 ?
 K6 K3 3.00(2) 2_565 ?
 K6 O6 3.21(2) 7_454 ?
 K6 O9 3.00(3) 7_454 ?
 K6 O10 3.11(3) 7_454 ?
 K6 O18 3.00(2) 7_454 ?
 K6 O21 3.20(3) . ?
 K6 O33 3.23(2) . ?
 K6 O39 3.17(3) . ?
 K6 O41 2.80(5) . ?
 K6 O42 2.90(4) . ?
 K6 W6 3.851(15) 7_454 ?
 K6 W8 3.995(16) . ?
 O1 K5 2.78(3) 4_564 ?
 O1 W1 1.71(2) . ?
 O2 K2 3.02(3) 7_444 ?
 O2 W2 1.72(2) . ?
 O3 K2 3.05(3) 7_444 ?
 O3 W3 1.66(3) . ?
 O4 K1 3.09(2) 4_564 ?
 O4 W1 1.953(19) . ?
 O4 W2 1.882(19) . ?
 O5 W1 2.000(19) . ?
 O5 W3 1.849(19) . ?
 O6 K2 3.18(2) 7_444 ?
 O6 K6 3.21(2) 7_444 ?
 O6 W2 1.90(2) . ?
 O6 W3 1.95(2) . ?
 O7 W1 1.914(19) . ?
 O7 W4 1.974(19) . ?
 O8 W3 1.86(2) . ?
 O8 W5 2.05(2) . ?
 O9 K6 3.00(3) 7_444 ?
 O9 W3 1.944(19) . ?
 O9 W6 1.938(19) . ?
 O10 K6 3.11(3) 7_444 ?
 O10 W2 1.90(2) . ?
 O10 W7 1.96(2) . ?
 O11 K1 2.96(2) 4_564 ?
 O11 W2 1.89(2) . ?
 O11 W8 1.96(2) . ?
 O12 K1 2.98(2) 4_564 ?
 O12 W1 1.82(2) . ?
 O13 K5 3.24(3) 2_565 ?
 O13 W4 1.728(19) . ?
 O14 K5 3.31(3) 2_565 ?
 O14 W4 1.949(19) . ?
 O14 W5 1.896(18) . ?
 O15 K5 3.30(3) 2_565 ?
 O15 W5 1.71(2) . ?
 O16 K4 3.11(2) 3 ?
 O16 W5 1.96(2) . ?
 O16 W6 1.92(2) . ?
 O17 W6 1.73(2) . ?
 O18 K6 3.00(2) 7_444 ?
 O18 W6 1.891(19) . ?
 O18 W7 1.93(2) . ?
 O19 W7 1.70(3) . ?
 O20 W7 1.85(2) . ?
 O20 W8 2.06(2) . ?
 O21 K3 3.20(3) 2_565 ?
 O21 W8 1.70(2) . ?
 O22 K1 2.77(2) 4_564 ?
 O22 K3 3.07(3) 2_565 ?
 O22 W8 1.76(2) . ?
 O23 K3 3.29(3) 2_565 ?
 O24 W4 1.862(18) . ?
 O24 Yb1 2.373(17) . ?
 O25 P1 1.545(17) . ?
 O25 W1 2.431(16) . ?
 O25 W4 2.431(17) . ?
 O26 P1 1.551(19) . ?
 O26 W3 2.437(18) . ?
 O26 W5 2.480(18) . ?
 O26 W6 2.417(18) . ?
 O27 P1 1.566(19) . ?
 O27 W2 2.380(18) . ?
 O27 W7 2.456(18) . ?
 O27 W8 2.465(19) . ?
 O28 P1 1.509(19) . ?
 O28 W9 2.453(18) . ?
 O28 W10 2.496(18) . ?
 O29 K5 3.21(3) 2_565 ?
 O29 W4 1.850(18) . ?
 O29 Yb1 2.304(19) . ?
 O30 K4 2.81(2) 3 ?
 O30 K5 3.17(3) 2_565 ?
 O30 W5 1.784(19) . ?
 O31 K4 3.25(2) 3 ?
 O31 W6 1.890(18) . ?
 O31 W10 1.934(18) . ?
 O32 W7 1.832(19) . ?
 O32 W10 2.005(19) . ?
 O33 K3 3.24(2) 2_565 ?
 O33 W8 1.875(19) . ?
 O33 W9 1.959(18) . ?
 O34 K3 3.16(3) 2_565 ?
 O34 W9 1.875(16) . ?
 O34 Yb1 2.294(17) . ?
 O35 W9 1.878(18) . ?
 O35 Yb1 2.377(18) . ?
 O36 K4 3.01(3) 3 ?
 O36 W10 1.81(2) . ?
 O37 W9 1.979(19) . ?
 O37 W10 1.90(2) . ?
 O38 K5 3.35(3) 2_565 ?
 O39 K3 3.27(3) 2_565 ?
 O39 W9 1.74(2) . ?
 O40 K2 2.80(3) 4_565 ?
 O40 K3 2.80(3) 3 ?
 O40 W10 1.71(2) . ?
 W1 K1 3.967(11) 4_564 ?
 W1 K5 4.130(17) 4_564 ?
 W2 K1 3.938(9) 4_564 ?
 W2 K2 3.878(14) 7_444 ?
 W3 K2 3.916(13) 7_444 ?
 W3 K6 4.114(16) 7_444 ?
 W4 K5 3.748(17) 2_565 ?
 W4 Yb1 3.3070(12) . ?
 W5 K4 3.790(13) 3 ?
 W5 K5 3.680(17) 2_565 ?
 W6 K4 4.120(13) 3 ?
 W6 K6 3.851(15) 7_444 ?
 W7 K6 4.025(16) 7_444 ?
 W8 K1 3.713(10) 4_564 ?
 W8 K3 3.577(16) 2_565 ?
 W9 K3 3.723(16) 2_565 ?
 W9 Yb1 3.2993(11) . ?
 W10 K3 4.101(14) 3 ?
 W10 K4 4.058(18) 3 ?
 Yb1 O24 2.373(18) 2_565 ?
 Yb1 O29 2.304(19) 2_565 ?
 Yb1 O34 2.293(17) 2_565 ?
 Yb1 O35 2.377(18) 2_565 ?
 Yb1 W4 3.3070(12) 2_565 ?
 Yb1 W9 3.2992(11) 2_565 ?

loop_
  _geom_angle_atom_site_label_1
  _geom_angle_atom_site_label_2
  _geom_angle_atom_site_label_3
  _geom_angle
  _geom_angle_site_symmetry_1
  _geom_angle_site_symmetry_3
  _geom_angle_publ_flag
 K3 Co1 K1 82.7(3) 2_565 4_564 ?
 O12 Co1 K1 50.6(6) . 4_564 ?
 O12 Co1 K3 131.0(7) . 2_565 ?
 O12 Co1 O23 98.2(9) . . ?
 O12 Co1 O24 92.8(8) . . ?
 O12 Co1 O25 78.3(8) . . ?
 O12 Co1 O34 169.1(8) . . ?
 O12 Co1 Yb1 136.6(6) . . ?
 O22 Co1 K1 44.5(6) . 4_564 ?
 O22 Co1 K3 54.4(6) . 2_565 ?
 O22 Co1 O12 91.2(9) . . ?
 O22 Co1 O23 98.5(9) . . ?
 O22 Co1 O24 166.8(8) . . ?
 O22 Co1 O25 94.0(7) . . ?
 O22 Co1 O34 89.5(7) . . ?
 O22 Co1 Yb1 130.7(6) . . ?
 O23 Co1 K1 86.6(7) . 4_564 ?
 O23 Co1 K3 60.5(7) . 2_565 ?
 O23 Co1 O24 93.4(8) . . ?
 O23 Co1 O25 167.1(8) . . ?
 O23 Co1 Yb1 87.5(7) . . ?
 O24 Co1 K1 142.7(5) . 4_564 ?
 O24 Co1 K3 129.1(6) . 2_565 ?
 O24 Co1 O25 74.6(6) . . ?
 O24 Co1 Yb1 43.8(5) . . ?
 O25 Co1 K1 100.2(4) . 4_564 ?
 O25 Co1 K3 130.9(5) . 2_565 ?
 O25 Co1 Yb1 86.8(4) . . ?
 O34 Co1 K1 133.0(5) . 4_564 ?
 O34 Co1 K3 57.0(5) . 2_565 ?
 O34 Co1 O23 92.5(8) . . ?
 O34 Co1 O24 84.3(7) . . ?
 O34 Co1 O25 90.9(6) . . ?
 O34 Co1 Yb1 41.3(5) . . ?
 Yb1 Co1 K1 171.5(2) . 4_564 ?
 Yb1 Co1 K3 89.1(2) . 2_565 ?
 K4 Co2 K5 82.1(4) 3 2_565 ?
 O28 Co2 K4 103.2(5) . 3 ?
 O28 Co2 K5 129.6(5) . 2_565 ?
 O28 Co2 Yb1 86.1(5) . . ?
 O29 Co2 K4 132.7(6) . 3 ?
 O29 Co2 K5 56.2(6) . 2_565 ?
 O29 Co2 O28 89.5(7) . . ?
 O29 Co2 O35 84.9(7) . . ?
 O29 Co2 O38 92.0(9) . . ?
 O29 Co2 Yb1 41.7(5) . . ?
 O30 Co2 K4 45.3(6) . 3 ?
 O30 Co2 K5 55.2(6) . 2_565 ?
 O30 Co2 O28 93.2(7) . . ?
 O30 Co2 O29 89.3(8) . . ?
 O30 Co2 O35 167.6(8) . . ?
 O30 Co2 O36 90.7(8) . . ?
 O30 Co2 O38 98.9(9) . . ?
 O30 Co2 Yb1 130.9(6) . . ?
 O35 Co2 K4 142.3(6) . 3 ?
 O35 Co2 K5 128.2(6) . 2_565 ?
 O35 Co2 O28 75.8(7) . . ?
 O35 Co2 Yb1 43.9(5) . . ?
 O36 Co2 K4 51.1(7) . 3 ?
 O36 Co2 K5 131.7(7) . 2_565 ?
 O36 Co2 O28 79.2(8) . . ?
 O36 Co2 O29 168.7(8) . . ?
 O36 Co2 O35 92.8(8) . . ?
 O36 Co2 O38 99.2(9) . . ?
 O36 Co2 Yb1 136.7(6) . . ?
 O38 Co2 K4 84.6(7) . 3 ?
 O38 Co2 K5 60.2(7) . 2_565 ?
 O38 Co2 O28 167.8(9) . . ?
 O38 Co2 O35 92.3(9) . . ?
 O38 Co2 Yb1 87.0(7) . . ?
 Yb1 Co2 K4 169.7(3) . 3 ?
 Yb1 Co2 K5 88.6(3) . 2_565 ?
 Co1 K1 W1 49.41(15) 4_565 4_565 ?
 Co1 K1 W2 78.44(19) 4_565 4_565 ?
 Co1 K1 W10 83.8(2) 4_565 . ?
 O4 K1 Co1 64.3(4) 4_565 4_565 ?
 O4 K1 O41 139.9(9) 4_565 . ?
 O4 K1 W1 28.9(4) 4_565 4_565 ?
 O4 K1 W2 27.9(4) 4_565 4_565 ?
 O4 K1 W8 67.4(4) 4_565 4_565 ?
 O4 K1 W10 148.0(5) 4_565 . ?
 O11 K1 Co1 77.7(4) 4_565 4_565 ?
 O11 K1 O4 51.9(5) 4_565 4_565 ?
 O11 K1 O12 91.0(6) 4_565 4_565 ?
 O11 K1 O41 111.9(10) 4_565 . ?
 O11 K1 W1 77.0(4) 4_565 4_565 ?
 O11 K1 W2 27.4(4) 4_565 4_565 ?
 O11 K1 W8 31.6(4) 4_565 4_565 ?
 O11 K1 W10 124.1(5) 4_565 . ?
 O12 K1 Co1 31.7(5) 4_565 4_565 ?
 O12 K1 O4 52.3(6) 4_565 4_565 ?
 O12 K1 O41 156.5(10) 4_565 . ?
 O12 K1 W1 25.7(5) 4_565 4_565 ?
 O12 K1 W2 77.4(5) 4_565 4_565 ?
 O12 K1 W8 81.7(5) 4_565 4_565 ?
 O12 K1 W10 99.9(5) 4_565 . ?
 O22 K1 Co1 30.8(4) 4_565 4_565 ?
 O22 K1 O4 68.8(6) 4_565 4_565 ?
 O22 K1 O11 54.8(6) 4_565 4_565 ?
 O22 K1 O12 60.3(6) 4_565 4_565 ?
 O22 K1 O41 137.4(10) 4_565 . ?
 O22 K1 W1 69.1(5) 4_565 4_565 ?
 O22 K1 W2 67.9(5) 4_565 4_565 ?
 O22 K1 W8 26.9(4) 4_565 4_565 ?
 O22 K1 W10 84.1(5) 4_565 . ?
 O37 K1 Co1 95.2(5) . 4_565 ?
 O37 K1 O4 150.2(7) . 4_565 ?
 O37 K1 O11 148.8(7) . 4_565 ?
 O37 K1 O12 98.7(7) . 4_565 ?
 O37 K1 O22 105.2(7) . 4_565 ?
 O37 K1 O41 64.5(10) . . ?
 O37 K1 W1 121.3(5) . 4_565 ?
 O37 K1 W2 173.1(5) . 4_565 ?
 O37 K1 W8 120.6(5) . 4_565 ?
 O37 K1 W10 25.0(4) . . ?
 O41 K1 Co1 155.3(9) . 4_565 ?
 O41 K1 W1 152.9(9) . 4_565 ?
 O41 K1 W2 120.9(9) . 4_565 ?
 O41 K1 W8 120.5(9) . 4_565 ?
 O41 K1 W10 72.0(8) . . ?
 O42 K1 Co1 124.6(8) . 4_565 ?
 O42 K1 O4 74.7(8) . 4_565 ?
 O42 K1 O11 105.1(9) . 4_565 ?
 O42 K1 O12 93.5(9) . 4_565 ?
 O42 K1 O22 143.2(9) . 4_565 ?
 O42 K1 O37 103.9(9) . . ?
 O42 K1 O41 76.2(12) . . ?
 O42 K1 W1 76.8(8) . 4_565 ?
 O42 K1 W2 82.2(8) . 4_565 ?
 O42 K1 W8 135.5(8) . 4_565 ?
 O42 K1 W10 128.4(8) . . ?
 W1 K1 W10 125.6(3) 4_565 . ?
 W2 K1 W1 56.40(14) 4_565 4_565 ?
 W2 K1 W10 149.3(3) 4_565 . ?
 W8 K1 Co1 56.33(15) 4_565 4_565 ?
 W8 K1 W1 81.00(19) 4_565 4_565 ?
 W8 K1 W2 53.41(13) 4_565 4_565 ?
 W8 K1 W10 95.9(2) 4_565 . ?
 K3 K2 K1 68.9(4) 2_565 4_564 ?
 K3 K2 K6 41.4(3) 2_565 . ?
 K6 K2 K1 98.2(3) . 4_564 ?
 O2 K2 K1 123.5(6) 7_454 4_564 ?
 O2 K2 K3 67.1(6) 7_454 2_565 ?
 O2 K2 K6 69.4(6) 7_454 . ?
 O2 K2 O3 105.5(8) 7_454 7_454 ?
 O2 K2 O6 53.4(6) 7_454 7_454 ?
 O2 K2 W2 25.1(4) 7_454 7_454 ?
 O2 K2 W3 81.8(5) 7_454 7_454 ?
 O3 K2 K1 120.6(6) 7_454 4_564 ?
 O3 K2 K3 107.9(6) 7_454 2_565 ?
 O3 K2 K6 67.8(6) 7_454 . ?
 O3 K2 O6 52.5(6) 7_454 7_454 ?
 O3 K2 W2 80.5(6) 7_454 7_454 ?
 O3 K2 W3 23.7(5) 7_454 7_454 ?
 O6 K2 K1 145.5(5) 7_454 4_564 ?
 O6 K2 K3 81.1(6) 7_454 2_565 ?
 O6 K2 K6 47.3(4) 7_454 . ?
 O6 K2 W2 29.1(4) 7_454 7_454 ?
 O6 K2 W3 29.6(4) 7_454 7_454 ?
 O21 K2 K1 58.5(6) . 4_564 ?
 O21 K2 K3 51.1(6) . 2_565 ?
 O21 K2 K6 47.1(6) . . ?
 O21 K2 O2 112.3(8) . 7_454 ?
 O21 K2 O3 74.0(8) . 7_454 ?
 O21 K2 O6 89.5(7) . 7_454 ?
 O21 K2 O40 77.4(7) . 4_564 ?
 O21 K2 W2 107.2(7) . 7_454 ?
 O21 K2 W3 84.4(6) . 7_454 ?
 O40 K2 K1 48.6(5) 4_564 4_564 ?
 O40 K2 K3 42.9(6) 4_564 2_565 ?
 O40 K2 K6 84.3(6) 4_564 . ?
 O40 K2 O2 75.0(7) 4_564 7_454 ?
 O40 K2 O3 149.1(8) 4_564 7_454 ?
 O40 K2 O6 116.5(8) 4_564 7_454 ?
 O40 K2 W2 97.4(6) 4_564 7_454 ?
 O40 K2 W3 142.1(7) 4_564 7_454 ?
 W2 K2 K1 143.5(4) 7_454 4_564 ?
 W2 K2 K3 76.4(4) 7_454 2_565 ?
 W2 K2 K6 60.1(3) 7_454 . ?
 W2 K2 W3 56.79(19) 7_454 7_454 ?
 W3 K2 K1 140.1(3) 7_454 4_564 ?
 W3 K2 K3 100.4(4) 7_454 2_565 ?
 W3 K2 K6 59.4(3) 7_454 . ?
 K6 K3 O21 62.1(6) 2_565 2_565 ?
 K6 K3 O22 103.5(6) 2_565 2_565 ?
 K6 K3 O23 156.5(8) 2_565 2_565 ?
 K6 K3 O33 62.2(5) 2_565 2_565 ?
 K6 K3 O34 103.1(6) 2_565 2_565 ?
 K6 K3 O39 60.6(6) 2_565 2_565 ?
 K6 K3 O44 99.2(10) 2_565 . ?
 K6 K3 W8 74.3(4) 2_565 2_565 ?
 K6 K3 W9 73.1(4) 2_565 2_565 ?
 O13 K3 K6 112.9(8) . 2_565 ?
 O13 K3 O21 164.2(9) . 2_565 ?
 O13 K3 O22 120.5(10) . 2_565 ?
 O13 K3 O23 71.0(7) . 2_565 ?
 O13 K3 O33 112.5(7) . 2_565 ?
 O13 K3 O34 71.8(7) . 2_565 ?
 O13 K3 O39 67.7(7) . 2_565 ?
 O13 K3 O40 123.0(8) . 3_554 ?
 O13 K3 O44 69.5(9) . . ?
 O13 K3 W8 137.7(8) . 2_565 ?
 O13 K3 W9 80.8(6) . 2_565 ?
 O21 K3 O23 107.4(8) 2_565 2_565 ?
 O21 K3 O33 51.7(6) 2_565 2_565 ?
 O21 K3 O39 98.0(7) 2_565 2_565 ?
 O21 K3 W8 28.3(5) 2_565 2_565 ?
 O21 K3 W9 83.4(5) 2_565 2_565 ?
 O22 K3 O21 51.4(6) 2_565 2_565 ?
 O22 K3 O23 58.4(7) 2_565 2_565 ?
 O22 K3 O33 49.2(6) 2_565 2_565 ?
 O22 K3 O34 54.7(6) 2_565 2_565 ?
 O22 K3 O39 94.2(7) 2_565 2_565 ?
 O22 K3 W8 29.5(4) 2_565 2_565 ?
 O22 K3 W9 66.6(5) 2_565 2_565 ?
 O23 K3 W8 87.6(6) 2_565 2_565 ?
 O23 K3 W9 85.1(6) 2_565 2_565 ?
 O33 K3 O23 94.5(8) 2_565 2_565 ?
 O33 K3 O39 51.7(6) 2_565 2_565 ?
 O33 K3 W8 31.4(4) 2_565 2_565 ?
 O33 K3 W9 31.7(4) 2_565 2_565 ?
 O34 K3 O21 94.2(7) 2_565 2_565 ?
 O34 K3 O23 54.9(6) 2_565 2_565 ?
 O34 K3 O33 49.5(5) 2_565 2_565 ?
 O34 K3 O39 51.9(6) 2_565 2_565 ?
 O34 K3 W8 66.1(5) 2_565 2_565 ?
 O34 K3 W9 30.2(3) 2_565 2_565 ?
 O39 K3 O23 103.1(8) 2_565 2_565 ?
 O39 K3 W8 83.1(5) 2_565 2_565 ?
 O39 K3 W9 27.8(4) 2_565 2_565 ?
 O40 K3 K6 116.7(8) 3_554 2_565 ?
 O40 K3 O21 70.0(7) 3_554 2_565 ?
 O40 K3 O22 72.5(7) 3_554 2_565 ?
 O40 K3 O23 74.5(8) 3_554 2_565 ?
 O40 K3 O33 114.2(8) 3_554 2_565 ?
 O40 K3 O34 119.7(9) 3_554 2_565 ?
 O40 K3 O39 165.8(9) 3_554 2_565 ?
 O40 K3 O44 76.6(9) 3_554 . ?
 O40 K3 W8 82.8(6) 3_554 2_565 ?
 O40 K3 W9 139.1(8) 3_554 2_565 ?
 O44 K3 O21 125.2(10) . 2_565 ?
 O44 K3 O22 147.5(9) . 2_565 ?
 O44 K3 O23 103.7(9) . 2_565 ?
 O44 K3 O33 161.0(10) . 2_565 ?
 O44 K3 O34 140.4(9) . 2_565 ?
 O44 K3 O39 117.4(9) . 2_565 ?
 O44 K3 W8 152.6(9) . 2_565 ?
 O44 K3 W9 143.7(8) . 2_565 ?
 W8 K3 W9 60.9(3) 2_565 2_565 ?
 Co2 K4 W4 103.1(4) 3_554 . ?
 Co2 K4 W6 76.3(2) 3_554 3_554 ?
 Co2 K4 W10 48.8(2) 3_554 3_554 ?
 O7 K4 Co2 95.8(5) . 3_554 ?
 O7 K4 O13 53.3(6) . . ?
 O7 K4 O16 148.1(8) . 3_554 ?
 O7 K4 O30 105.8(7) . 3_554 ?
 O7 K4 O31 151.3(8) . 3_554 ?
 O7 K4 O36 101.7(7) . 3_554 ?
 O7 K4 W4 27.8(4) . . ?
 O7 K4 W5 120.4(6) . 3_554 ?
 O7 K4 W6 171.0(6) . 3_554 ?
 O7 K4 W10 123.4(7) . 3_554 ?
 O13 K4 Co2 110.3(6) . 3_554 ?
 O13 K4 W4 25.6(3) . . ?
 O13 K4 W5 165.7(6) . 3_554 ?
 O13 K4 W6 133.3(6) . 3_554 ?
 O13 K4 W10 94.3(5) . 3_554 ?
 O16 K4 Co2 76.7(5) 3_554 3_554 ?
 O16 K4 O13 158.3(7) 3_554 . ?
 O16 K4 O31 50.0(5) 3_554 3_554 ?
 O16 K4 W4 175.8(7) 3_554 . ?
 O16 K4 W5 31.1(4) 3_554 3_554 ?
 O16 K4 W6 26.3(4) 3_554 3_554 ?
 O16 K4 W10 74.7(5) 3_554 3_554 ?
 O30 K4 Co2 30.6(4) 3_554 3_554 ?
 O30 K4 O13 139.3(8) 3_554 . ?
 O30 K4 O16 53.6(6) 3_554 3_554 ?
 O30 K4 O31 66.2(6) 3_554 3_554 ?
 O30 K4 O36 58.9(6) 3_554 3_554 ?
 O30 K4 W4 124.6(6) 3_554 . ?
 O30 K4 W5 26.4(4) 3_554 3_554 ?
 O30 K4 W6 65.2(5) 3_554 3_554 ?
 O30 K4 W10 67.3(5) 3_554 3_554 ?
 O31 K4 Co2 62.9(4) 3_554 3_554 ?
 O31 K4 O13 113.7(7) 3_554 . ?
 O31 K4 W4 133.8(6) 3_554 . ?
 O31 K4 W5 65.1(4) 3_554 3_554 ?
 O31 K4 W6 26.5(3) 3_554 3_554 ?
 O31 K4 W10 28.0(4) 3_554 3_554 ?
 O36 K4 Co2 31.4(4) 3_554 3_554 ?
 O36 K4 O13 89.1(7) 3_554 . ?
 O36 K4 O16 87.9(7) 3_554 3_554 ?
 O36 K4 O31 50.0(6) 3_554 3_554 ?
 O36 K4 W4 94.1(6) 3_554 . ?
 O36 K4 W5 79.6(5) 3_554 3_554 ?
 O36 K4 W6 73.8(5) 3_554 3_554 ?
 O36 K4 W10 24.4(4) 3_554 3_554 ?
 O44 K4 Co2 120.8(10) . 3_554 ?
 O44 K4 O7 116.3(10) . . ?
 O44 K4 O13 65.0(9) . . ?
 O44 K4 O16 93.6(10) . 3_554 ?
 O44 K4 O30 132.9(11) . 3_554 ?
 O44 K4 O31 66.7(9) . 3_554 ?
 O44 K4 O36 91.3(11) . 3_554 ?
 O44 K4 W4 90.1(9) . . ?
 O44 K4 W5 123.4(9) . 3_554 ?
 O44 K4 W6 72.1(8) . 3_554 ?
 O44 K4 W10 72.1(9) . 3_554 ?
 W4 K4 W6 157.8(5) . 3_554 ?
 W4 K4 W10 108.5(4) . 3_554 ?
 W5 K4 Co2 55.86(18) 3_554 3_554 ?
 W5 K4 W4 145.8(4) 3_554 . ?
 W5 K4 W6 51.53(16) 3_554 3_554 ?
 W5 K4 W10 78.9(3) 3_554 3_554 ?
 W10 K4 W6 54.19(19) 3_554 3_554 ?
 O1 K5 O13 169.2(9) 4_565 2_565 ?
 O1 K5 O14 118.9(8) 4_565 2_565 ?
 O1 K5 O15 73.9(7) 4_565 2_565 ?
 O1 K5 O29 121.5(8) 4_565 2_565 ?
 O1 K5 O30 77.3(7) 4_565 2_565 ?
 O1 K5 O38 74.5(8) 4_565 2_565 ?
 O1 K5 O42 78.7(9) 4_565 . ?
 O1 K5 O43 123.3(12) 4_565 . ?
 O1 K5 W4 142.4(8) 4_565 2_565 ?
 O1 K5 W5 88.0(7) 4_565 2_565 ?
 O13 K5 O14 50.6(5) 2_565 2_565 ?
 O13 K5 O15 97.4(7) 2_565 2_565 ?
 O13 K5 O38 102.1(7) 2_565 2_565 ?
 O13 K5 W4 27.4(4) 2_565 2_565 ?
 O13 K5 W5 81.5(5) 2_565 2_565 ?
 O14 K5 O38 92.5(7) 2_565 2_565 ?
 O14 K5 W4 31.3(4) 2_565 2_565 ?
 O14 K5 W5 30.9(4) 2_565 2_565 ?
 O15 K5 O14 51.4(6) 2_565 2_565 ?
 O15 K5 O38 104.1(7) 2_565 2_565 ?
 O15 K5 W4 82.7(5) 2_565 2_565 ?
 O15 K5 W5 27.6(4) 2_565 2_565 ?
 O29 K5 O13 51.3(5) 2_565 2_565 ?
 O29 K5 O14 48.6(5) 2_565 2_565 ?
 O29 K5 O15 92.2(7) 2_565 2_565 ?
 O29 K5 O38 53.9(6) 2_565 2_565 ?
 O29 K5 W4 29.6(4) 2_565 2_565 ?
 O29 K5 W5 64.6(5) 2_565 2_565 ?
 O30 K5 O13 92.2(7) 2_565 2_565 ?
 O30 K5 O14 48.3(5) 2_565 2_565 ?
 O30 K5 O15 49.8(6) 2_565 2_565 ?
 O30 K5 O29 53.4(6) 2_565 2_565 ?
 O30 K5 O38 56.8(6) 2_565 2_565 ?
 O30 K5 W4 65.1(5) 2_565 2_565 ?
 O30 K5 W5 29.0(4) 2_565 2_565 ?
 O38 K5 W4 83.4(6) 2_565 2_565 ?
 O38 K5 W5 85.5(6) 2_565 2_565 ?
 O39 K5 O1 118.3(10) . 4_565 ?
 O39 K5 O13 68.7(7) . 2_565 ?
 O39 K5 O14 111.1(8) . 2_565 ?
 O39 K5 O15 162.0(9) . 2_565 ?
 O39 K5 O29 70.3(7) . 2_565 ?
 O39 K5 O30 117.2(8) . 2_565 ?
 O39 K5 O38 69.4(8) . 2_565 ?
 O39 K5 O42 62.9(9) . . ?
 O39 K5 O43 106.6(11) . . ?
 O39 K5 W4 79.9(6) . 2_565 ?
 O39 K5 W5 134.9(8) . 2_565 ?
 O42 K5 O13 112.0(9) . 2_565 ?
 O42 K5 O14 159.9(9) . 2_565 ?
 O42 K5 O15 134.9(10) . 2_565 ?
 O42 K5 O29 132.8(10) . 2_565 ?
 O42 K5 O30 151.7(10) . 2_565 ?
 O42 K5 O38 102.2(9) . 2_565 ?
 O42 K5 W4 136.5(9) . 2_565 ?
 O42 K5 W5 162.1(9) . 2_565 ?
 O43 K5 O13 58.0(10) . 2_565 ?
 O43 K5 O14 68.6(10) . 2_565 ?
 O43 K5 O15 72.9(10) . 2_565 ?
 O43 K5 O29 104.5(11) . 2_565 ?
 O43 K5 O30 111.6(11) . 2_565 ?
 O43 K5 O38 158.4(12) . 2_565 ?
 O43 K5 O42 94.0(12) . . ?
 O43 K5 W4 74.9(9) . 2_565 ?
 O43 K5 W5 83.2(9) . 2_565 ?
 W5 K5 W4 59.8(3) 2_565 2_565 ?
 K3 K6 O6 100.9(7) 2_565 7_454 ?
 K3 K6 O10 89.0(7) 2_565 7_454 ?
 K3 K6 O18 138.2(8) 2_565 7_454 ?
 K3 K6 O21 62.0(6) 2_565 . ?
 K3 K6 O33 62.5(6) 2_565 . ?
 K3 K6 O39 63.9(6) 2_565 . ?
 K3 K6 W6 163.1(6) 2_565 7_454 ?
 K3 K6 W8 59.5(4) 2_565 . ?
 O6 K6 O33 132.7(8) 7_454 . ?
 O6 K6 W6 64.3(4) 7_454 7_454 ?
 O6 K6 W8 105.1(6) 7_454 . ?
 O9 K6 K3 144.6(8) 7_454 2_565 ?
 O9 K6 O6 49.9(6) 7_454 7_454 ?
 O9 K6 O10 83.8(6) 7_454 7_454 ?
 O9 K6 O18 52.9(6) 7_454 7_454 ?
 O9 K6 O21 90.5(7) 7_454 . ?
 O9 K6 O33 118.9(8) 7_454 . ?
 O9 K6 O39 148.5(8) 7_454 . ?
 O9 K6 W6 29.7(4) 7_454 7_454 ?
 O9 K6 W8 104.4(6) 7_454 . ?
 O10 K6 O6 48.4(6) 7_454 7_454 ?
 O10 K6 O21 116.4(8) 7_454 . ?
 O10 K6 O33 151.5(8) 7_454 . ?
 O10 K6 O39 116.7(8) 7_454 . ?
 O10 K6 W6 75.2(5) 7_454 7_454 ?
 O10 K6 W8 136.5(6) 7_454 . ?
 O18 K6 O6 62.2(6) 7_454 7_454 ?
 O18 K6 O10 50.5(6) 7_454 7_454 ?
 O18 K6 O21 139.2(8) 7_454 . ?
 O18 K6 O33 157.0(8) 7_454 . ?
 O18 K6 O39 120.7(8) 7_454 . ?
 O18 K6 W6 28.8(4) 7_454 7_454 ?
 O18 K6 W8 157.3(7) 7_454 . ?
 O21 K6 O6 81.0(7) . 7_454 ?
 O21 K6 O33 51.7(6) . . ?
 O21 K6 W6 119.9(7) . 7_454 ?
 O21 K6 W8 24.2(4) . . ?
 O33 K6 W6 133.1(7) . 7_454 ?
 O33 K6 W8 27.6(4) . . ?
 O39 K6 O6 160.9(9) . 7_454 ?
 O39 K6 O21 99.9(7) . . ?
 O39 K6 O33 52.6(6) . . ?
 O39 K6 W6 128.4(6) . 7_454 ?
 O39 K6 W8 77.8(5) . . ?
 O41 K6 K3 124.0(12) . 2_565 ?
 O41 K6 O6 115.7(12) . 7_454 ?
 O41 K6 O9 68.6(11) . 7_454 ?
 O41 K6 O10 147.0(12) . 7_454 ?
 O41 K6 O18 97.1(11) . 7_454 ?
 O41 K6 O21 82.7(12) . . ?
 O41 K6 O33 61.5(11) . . ?
 O41 K6 O39 83.2(11) . . ?
 O41 K6 O42 80.4(13) . . ?
 O41 K6 W6 71.9(10) . 7_454 ?
 O41 K6 W8 70.5(10) . . ?
 O42 K6 K3 112.2(9) . 2_565 ?
 O42 K6 O6 125.1(9) . 7_454 ?
 O42 K6 O9 102.2(9) . 7_454 ?
 O42 K6 O10 88.6(9) . 7_454 ?
 O42 K6 O18 63.9(9) . 7_454 ?
 O42 K6 O21 153.3(10) . . ?
 O42 K6 O33 101.7(9) . . ?
 O42 K6 O39 57.7(9) . . ?
 O42 K6 W6 73.8(8) . 7_454 ?
 O42 K6 W8 129.2(8) . . ?
 W6 K6 W8 129.9(5) 7_454 . ?
 W1 O1 K5 132.2(13) . 4_564 ?
 W2 O2 K2 106.8(10) . 7_444 ?
 W3 O3 K2 108.8(12) . 7_444 ?
 W1 O4 K1 101.2(7) . 4_564 ?
 W2 O4 K1 101.9(8) . 4_564 ?
 W2 O4 W1 153.7(11) . . ?
 W3 O5 W1 154.7(11) . . ?
 K2 O6 K6 86.0(6) 7_444 7_444 ?
 W2 O6 K2 96.4(8) . 7_444 ?
 W2 O6 K6 105.6(8) . 7_444 ?
 W2 O6 W3 149.0(11) . . ?
 W3 O6 K2 96.8(7) . 7_444 ?
 W3 O6 K6 103.2(8) . 7_444 ?
 W1 O7 K4 121.6(9) . . ?
 W1 O7 W4 126.1(10) . . ?
 W4 O7 K4 111.0(8) . . ?
 W3 O8 W5 125.2(10) . . ?
 W3 O9 K6 111.0(8) . 7_444 ?
 W6 O9 K6 100.5(8) . 7_444 ?
 W6 O9 W3 123.9(10) . . ?
 W2 O10 K6 109.0(9) . 7_444 ?
 W2 O10 W7 125.2(11) . . ?
 W7 O10 K6 102.6(8) . 7_444 ?
 W2 O11 K1 106.4(8) . 4_564 ?
 W2 O11 W8 127.3(10) . . ?
 W8 O11 K1 95.8(8) . 4_564 ?
 Co1 O12 K1 97.7(8) . 4_564 ?
 W1 O12 Co1 115.6(11) . . ?
 W1 O12 K1 109.1(9) . 4_564 ?
 K3 O13 K4 91.1(7) . . ?
 K3 O13 K5 101.1(8) . 2_565 ?
 K5 O13 K4 139.7(8) 2_565 . ?
 W4 O13 K3 145.6(12) . . ?
 W4 O13 K4 98.4(8) . . ?
 W4 O13 K5 92.7(8) . 2_565 ?
 W4 O14 K5 86.9(7) . 2_565 ?
 W5 O14 K5 85.4(7) . 2_565 ?
 W5 O14 W4 148.9(11) . . ?
 W5 O15 K5 88.7(8) . 2_565 ?
 W5 O16 K4 94.0(8) . 3 ?
 W6 O16 K4 107.7(9) . 3 ?
 W6 O16 W5 125.6(11) . . ?
 W6 O18 K6 101.3(9) . 7_444 ?
 W6 O18 W7 150.3(12) . . ?
 W7 O18 K6 107.2(9) . 7_444 ?
 W7 O20 W8 125.0(11) . . ?
 K2 O21 K3 87.4(8) . 2_565 ?
 K2 O21 K6 94.4(8) . . ?
 K3 O21 K6 55.9(6) 2_565 . ?
 W8 O21 K2 153.1(13) . . ?
 W8 O21 K3 88.4(10) . 2_565 ?
 W8 O21 K6 105.2(10) . . ?
 Co1 O22 K1 104.7(8) . 4_564 ?
 Co1 O22 K3 93.1(8) . 2_565 ?
 K1 O22 K3 118.3(7) 4_564 2_565 ?
 W8 O22 Co1 140.1(11) . . ?
 W8 O22 K1 107.7(9) . 4_564 ?
 W8 O22 K3 91.5(8) . 2_565 ?
 Co1 O23 K3 86.1(8) . 2_565 ?
 Co1 O24 Yb1 98.2(7) . . ?
 W4 O24 Co1 117.5(9) . . ?
 W4 O24 Yb1 102.0(7) . . ?
 Co1 O25 W1 86.5(5) . . ?
 Co1 O25 W4 91.1(6) . . ?
 P1 O25 Co1 123.2(9) . . ?
 P1 O25 W1 127.9(9) . . ?
 P1 O25 W4 125.5(9) . . ?
 W4 O25 W1 90.9(6) . . ?
 P1 O26 W3 125.8(10) . . ?
 P1 O26 W5 123.6(10) . . ?
 P1 O26 W6 126.9(10) . . ?
 W3 O26 W5 89.8(6) . . ?
 W6 O26 W3 89.8(6) . . ?
 W6 O26 W5 89.6(6) . . ?
 P1 O27 W2 128.4(10) . . ?
 P1 O27 W7 123.3(10) . . ?
 P1 O27 W8 123.7(10) . . ?
 W2 O27 W7 90.1(6) . . ?
 W2 O27 W8 90.6(6) . . ?
 W7 O27 W8 89.6(6) . . ?
 Co2 O28 W9 90.8(6) . . ?
 Co2 O28 W10 85.7(6) . . ?
 P1 O28 Co2 127.0(10) . . ?
 P1 O28 W9 125.8(10) . . ?
 P1 O28 W10 126.2(10) . . ?
 W9 O28 W10 88.8(6) . . ?
 Co2 O29 K5 91.4(7) . 2_565 ?
 Co2 O29 Yb1 101.8(8) . . ?
 W4 O29 Co2 139.8(10) . . ?
 W4 O29 K5 91.6(8) . 2_565 ?
 W4 O29 Yb1 105.0(8) . . ?
 Yb1 O29 K5 133.3(8) . 2_565 ?
 Co2 O30 K4 104.1(8) . 3 ?
 Co2 O30 K5 93.4(7) . 2_565 ?
 K4 O30 K5 115.2(8) 3 2_565 ?
 W5 O30 Co2 140.3(11) . . ?
 W5 O30 K4 109.2(9) . 3 ?
 W5 O30 K5 91.5(8) . 2_565 ?
 W6 O31 K4 103.3(7) . 3 ?
 W6 O31 W10 153.9(10) . . ?
 W10 O31 K4 99.8(7) . 3 ?
 W7 O32 W10 155.3(11) . . ?
 K6 O33 K3 55.3(6) . 2_565 ?
 W8 O33 K3 84.3(7) . 2_565 ?
 W8 O33 K6 99.6(7) . . ?
 W8 O33 W9 150.0(10) . . ?
 W9 O33 K3 87.9(7) . 2_565 ?
 W9 O33 K6 99.6(8) . . ?
 Co1 O34 K3 90.2(6) . 2_565 ?
 Co1 O34 Yb1 102.8(7) . . ?
 W9 O34 Co1 140.1(9) . . ?
 W9 O34 K3 91.8(7) . 2_565 ?
 W9 O34 Yb1 104.2(7) . . ?
 Yb1 O34 K3 133.9(7) . 2_565 ?
 Co2 O35 Yb1 98.3(7) . . ?
 W9 O35 Co2 116.6(9) . . ?
 W9 O35 Yb1 101.0(8) . . ?
 Co2 O36 K4 97.6(8) . 3 ?
 W10 O36 Co2 117.2(11) . . ?
 W10 O36 K4 112.3(10) . 3 ?
 W9 O37 K1 114.9(9) . . ?
 W10 O37 K1 117.3(9) . . ?
 W10 O37 W9 126.5(10) . . ?
 Co2 O38 K5 87.3(8) . 2_565 ?
 K5 O39 K3 101.8(8) . 2_565 ?
 K5 O39 K6 102.6(9) . . ?
 K6 O39 K3 55.5(6) . 2_565 ?
 W9 O39 K3 90.9(9) . 2_565 ?
 W9 O39 K5 149.6(12) . . ?
 W9 O39 K6 107.4(10) . . ?
 K3 O40 K2 94.1(8) 3 4_565 ?
 W10 O40 K2 132.6(12) . 4_565 ?
 W10 O40 K3 129.4(11) . 3 ?
 K6 O41 K1 93.9(14) . . ?
 K1 O42 K5 104.2(12) . . ?
 K1 O42 K6 103.5(12) . . ?
 K6 O42 K5 100.3(11) . . ?
 K4 O44 K3 98.2(13) . . ?
 O25 P1 O26 109.1(10) . . ?
 O25 P1 O27 108.4(10) . . ?
 O26 P1 O27 107.6(10) . . ?
 O28 P1 O25 109.8(10) . . ?
 O28 P1 O26 109.5(10) . . ?
 O28 P1 O27 112.4(10) . . ?
 K1 W1 K4 130.5(3) 4_564 . ?
 K1 W1 K5 67.5(3) 4_564 4_564 ?
 K4 W1 K5 75.5(3) . 4_564 ?
 O1 W1 K1 93.2(8) . 4_564 ?
 O1 W1 K4 65.7(8) . . ?
 O1 W1 K5 30.0(8) . 4_564 ?
 O1 W1 O4 103.8(9) . . ?
 O1 W1 O5 96.5(10) . . ?
 O1 W1 O7 100.3(10) . . ?
 O1 W1 O12 103.9(11) . . ?
 O1 W1 O25 171.6(9) . . ?
 O4 W1 K1 49.9(6) . 4_564 ?
 O4 W1 K4 169.1(6) . . ?
 O4 W1 K5 96.8(6) . 4_564 ?
 O4 W1 O5 81.3(8) . . ?
 O4 W1 O25 83.8(7) . . ?
 O5 W1 K1 131.2(6) . 4_564 ?
 O5 W1 K4 96.7(6) . . ?
 O5 W1 K5 124.8(6) . 4_564 ?
 O5 W1 O25 80.6(7) . . ?
 O7 W1 K1 138.3(6) . 4_564 ?
 O7 W1 K4 35.2(6) . . ?
 O7 W1 K5 108.9(6) . 4_564 ?
 O7 W1 O4 154.1(8) . . ?
 O7 W1 O5 86.5(8) . . ?
 O7 W1 O25 71.7(7) . . ?
 O12 W1 K1 45.3(7) . 4_564 ?
 O12 W1 K4 94.7(7) . . ?
 O12 W1 K5 74.8(7) . 4_564 ?
 O12 W1 O4 90.5(9) . . ?
 O12 W1 O5 159.3(9) . . ?
 O12 W1 O7 93.0(9) . . ?
 O12 W1 O25 79.6(8) . . ?
 O25 W1 K1 94.6(4) . 4_564 ?
 O25 W1 K4 106.6(4) . . ?
 O25 W1 K5 154.4(5) . 4_564 ?
 K2 W2 K1 110.5(3) 7_444 4_564 ?
 O2 W2 K1 87.2(8) . 4_564 ?
 O2 W2 K2 48.2(8) . 7_444 ?
 O2 W2 O4 102.2(9) . . ?
 O2 W2 O6 100.6(10) . . ?
 O2 W2 O10 101.4(10) . . ?
 O2 W2 O11 102.3(10) . . ?
 O2 W2 O27 172.6(9) . . ?
 O4 W2 K1 50.3(6) . 4_564 ?
 O4 W2 K2 85.7(6) . 7_444 ?
 O4 W2 O6 86.5(8) . . ?
 O4 W2 O10 156.2(8) . . ?
 O4 W2 O11 89.5(8) . . ?
 O4 W2 O27 83.3(7) . . ?
 O6 W2 K1 136.5(6) . 4_564 ?
 O6 W2 K2 54.5(6) . 7_444 ?
 O6 W2 O10 86.2(9) . . ?
 O6 W2 O27 84.5(7) . . ?
 O10 W2 K1 134.5(6) . 4_564 ?
 O10 W2 K2 108.0(7) . 7_444 ?
 O10 W2 O27 73.5(8) . . ?
 O11 W2 K1 46.2(6) . 4_564 ?
 O11 W2 K2 147.7(6) . 7_444 ?
 O11 W2 O6 157.1(9) . . ?
 O11 W2 O10 88.5(9) . . ?
 O11 W2 O27 72.6(7) . . ?
 O27 W2 K1 92.7(5) . 4_564 ?
 O27 W2 K2 138.1(5) . 7_444 ?
 K2 W3 K6 65.6(3) 7_444 7_444 ?
 O3 W3 K2 47.5(9) . 7_444 ?
 O3 W3 K6 83.8(9) . 7_444 ?
 O3 W3 O5 102.6(11) . . ?
 O3 W3 O6 99.2(11) . . ?
 O3 W3 O8 102.9(11) . . ?
 O3 W3 O9 100.9(10) . . ?
 O3 W3 O26 173.0(10) . . ?
 O5 W3 K2 86.1(6) . 7_444 ?
 O5 W3 K6 135.0(6) . 7_444 ?
 O5 W3 O6 85.8(8) . . ?
 O5 W3 O8 92.3(9) . . ?
 O5 W3 O9 155.8(8) . . ?
 O5 W3 O26 84.0(7) . . ?
 O6 W3 K2 53.6(6) . 7_444 ?
 O6 W3 K6 49.3(6) . 7_444 ?
 O6 W3 O26 83.1(7) . . ?
 O8 W3 K2 148.6(7) . 7_444 ?
 O8 W3 K6 130.1(7) . 7_444 ?
 O8 W3 O6 157.6(8) . . ?
 O8 W3 O9 87.9(9) . . ?
 O8 W3 O26 74.5(8) . . ?
 O9 W3 K2 106.0(6) . 7_444 ?
 O9 W3 K6 42.8(6) . 7_444 ?
 O9 W3 O6 84.8(8) . . ?
 O9 W3 O26 72.7(7) . . ?
 O26 W3 K2 136.2(5) . 7_444 ?
 O26 W3 K6 92.9(5) . 7_444 ?
 K5 W4 K4 106.1(3) 2_565 . ?
 O7 W4 K4 41.2(6) . . ?
 O7 W4 K5 133.2(6) . 2_565 ?
 O7 W4 O25 70.8(7) . . ?
 O7 W4 Yb1 134.5(6) . . ?
 O13 W4 K4 55.9(7) . . ?
 O13 W4 K5 59.8(7) . 2_565 ?
 O13 W4 O7 96.9(8) . . ?
 O13 W4 O14 99.1(8) . . ?
 O13 W4 O24 103.5(9) . . ?
 O13 W4 O25 167.7(8) . . ?
 O13 W4 O29 102.5(9) . . ?
 O13 W4 Yb1 101.4(7) . . ?
 O14 W4 K4 96.3(6) . . ?
 O14 W4 K5 61.8(6) . 2_565 ?
 O14 W4 O7 85.8(8) . . ?
 O14 W4 O25 81.4(7) . . ?
 O14 W4 Yb1 130.8(5) . . ?
 O24 W4 K4 95.8(6) . . ?
 O24 W4 K5 131.9(6) . 2_565 ?
 O24 W4 O7 90.7(8) . . ?
 O24 W4 O14 157.4(8) . . ?
 O24 W4 O25 76.4(7) . . ?
 O24 W4 Yb1 44.6(5) . . ?
 O25 W4 K4 111.8(4) . . ?
 O25 W4 K5 129.4(5) . 2_565 ?
 O25 W4 Yb1 87.1(4) . . ?
 O29 W4 K4 158.3(6) . . ?
 O29 W4 K5 58.8(6) . 2_565 ?
 O29 W4 O7 160.5(8) . . ?
 O29 W4 O14 89.7(8) . . ?
 O29 W4 O24 86.1(8) . . ?
 O29 W4 O25 89.7(7) . . ?
 O29 W4 Yb1 42.3(6) . . ?
 Yb1 W4 K4 132.1(3) . . ?
 Yb1 W4 K5 91.7(3) . 2_565 ?
 K5 W5 K4 85.1(3) 2_565 3 ?
 O8 W5 K4 136.3(6) . 3 ?
 O8 W5 K5 134.1(6) . 2_565 ?
 O8 W5 O26 70.5(7) . . ?
 O14 W5 K4 136.5(6) . 3 ?
 O14 W5 K5 63.7(6) . 2_565 ?
 O14 W5 O8 85.6(8) . . ?
 O14 W5 O16 152.7(8) . . ?
 O14 W5 O26 81.6(7) . . ?
 O15 W5 K4 84.7(8) . 3 ?
 O15 W5 K5 63.6(8) . 2_565 ?
 O15 W5 O8 96.2(9) . . ?
 O15 W5 O14 105.1(9) . . ?
 O15 W5 O16 100.4(10) . . ?
 O15 W5 O26 164.9(8) . . ?
 O15 W5 O30 102.6(9) . . ?
 O16 W5 K4 55.0(6) . 3 ?
 O16 W5 K5 139.1(7) . 2_565 ?
 O16 W5 O8 82.2(8) . . ?
 O16 W5 O26 71.3(7) . . ?
 O26 W5 K4 99.8(5) . 3 ?
 O26 W5 K5 130.9(5) . 2_565 ?
 O30 W5 K4 44.5(7) . 3 ?
 O30 W5 K5 59.5(7) . 2_565 ?
 O30 W5 O8 161.0(8) . . ?
 O30 W5 O14 92.3(8) . . ?
 O30 W5 O16 91.4(9) . . ?
 O30 W5 O26 90.5(7) . . ?
 K6 W6 K4 167.0(3) 7_444 3 ?
 O9 W6 K4 132.7(6) . 3 ?
 O9 W6 K6 49.9(6) . 7_444 ?
 O9 W6 O26 73.3(7) . . ?
 O16 W6 K4 46.0(7) . 3 ?
 O16 W6 K6 135.2(7) . 7_444 ?
 O16 W6 O9 86.9(8) . . ?
 O16 W6 O26 73.4(8) . . ?
 O17 W6 K4 87.4(8) . 3 ?
 O17 W6 K6 79.7(8) . 7_444 ?
 O17 W6 O9 100.5(9) . . ?
 O17 W6 O16 100.7(10) . . ?
 O17 W6 O18 101.7(10) . . ?
 O17 W6 O26 171.5(9) . . ?
 O17 W6 O31 102.7(9) . . ?
 O18 W6 K4 135.8(7) . 3 ?
 O18 W6 K6 49.9(7) . 7_444 ?
 O18 W6 O9 88.5(8) . . ?
 O18 W6 O16 157.6(9) . . ?
 O18 W6 O26 84.2(7) . . ?
 O26 W6 K4 92.6(5) . 3 ?
 O26 W6 K6 100.0(5) . 7_444 ?
 O31 W6 K4 50.2(6) . 3 ?
 O31 W6 K6 134.1(6) . 7_444 ?
 O31 W6 O9 156.7(8) . . ?
 O31 W6 O16 89.9(8) . . ?
 O31 W6 O18 85.7(8) . . ?
 O31 W6 O26 83.7(7) . . ?
 O10 W7 K6 49.0(7) . 7_444 ?
 O10 W7 O27 70.7(7) . . ?
 O18 W7 K6 45.5(6) . 7_444 ?
 O18 W7 O10 84.3(8) . . ?
 O18 W7 O27 83.7(7) . . ?
 O19 W7 K6 80.0(9) . 7_444 ?
 O19 W7 O10 101.3(11) . . ?
 O19 W7 O18 99.1(11) . . ?
 O19 W7 O20 102.7(11) . . ?
 O19 W7 O27 171.4(10) . . ?
 O19 W7 O32 104.1(11) . . ?
 O20 W7 K6 136.7(7) . 7_444 ?
 O20 W7 O10 88.9(9) . . ?
 O20 W7 O18 158.1(8) . . ?
 O20 W7 O27 74.4(8) . . ?
 O27 W7 K6 96.5(5) . 7_444 ?
 O32 W7 K6 129.9(6) . 7_444 ?
 O32 W7 O10 153.7(8) . . ?
 O32 W7 O18 85.3(8) . . ?
 O32 W7 O20 91.9(9) . . ?
 O32 W7 O27 84.2(7) . . ?
 K1 W8 K6 125.8(3) 4_564 . ?
 K3 W8 K1 87.0(3) 2_565 4_564 ?
 K3 W8 K6 46.2(4) 2_565 . ?
 O11 W8 K1 52.6(6) . 4_564 ?
 O11 W8 K3 138.8(6) . 2_565 ?
 O11 W8 K6 151.7(6) . . ?
 O11 W8 O20 82.6(8) . . ?
 O11 W8 O27 69.6(7) . . ?
 O20 W8 K1 134.4(6) . 4_564 ?
 O20 W8 K3 134.7(6) . 2_565 ?
 O20 W8 K6 88.9(6) . . ?
 O20 W8 O27 70.9(7) . . ?
 O21 W8 K1 88.3(8) . 4_564 ?
 O21 W8 K3 63.3(9) . 2_565 ?
 O21 W8 K6 50.6(8) . . ?
 O21 W8 O11 103.2(10) . . ?
 O21 W8 O20 95.4(10) . . ?
 O21 W8 O22 103.6(10) . . ?
 O21 W8 O27 164.9(9) . . ?
 O21 W8 O33 103.4(10) . . ?
 O22 W8 K1 45.4(7) . 4_564 ?
 O22 W8 K3 59.0(8) . 2_565 ?
 O22 W8 K6 105.0(7) . . ?
 O22 W8 O11 90.6(9) . . ?
 O22 W8 O20 160.9(9) . . ?
 O22 W8 O27 90.0(8) . . ?
 O22 W8 O33 92.6(9) . . ?
 O27 W8 K1 96.9(5) . 4_564 ?
 O27 W8 K3 131.0(5) . 2_565 ?
 O27 W8 K6 132.5(5) . . ?
 O33 W8 K1 138.0(6) . 4_564 ?
 O33 W8 K3 64.3(6) . 2_565 ?
 O33 W8 K6 52.8(6) . . ?
 O33 W8 O11 151.6(8) . . ?
 O33 W8 O20 85.3(8) . . ?
 O33 W8 O27 82.2(7) . . ?
 K1 W9 K6 66.4(3) . . ?
 K3 W9 K1 108.8(4) 2_565 . ?
 K3 W9 K6 45.2(4) 2_565 . ?
 O28 W9 K1 110.3(5) . . ?
 O28 W9 K3 127.1(5) . 2_565 ?
 O28 W9 K6 131.6(5) . . ?
 O28 W9 Yb1 85.9(4) . . ?
 O33 W9 K1 95.0(6) . . ?
 O33 W9 K3 60.3(6) . 2_565 ?
 O33 W9 K6 51.9(6) . . ?
 O33 W9 O28 82.0(7) . . ?
 O33 W9 O37 86.0(8) . . ?
 O33 W9 Yb1 129.9(5) . . ?
 O34 W9 K1 161.9(6) . . ?
 O34 W9 K3 58.0(6) . 2_565 ?
 O34 W9 K6 102.9(6) . . ?
 O34 W9 O28 87.8(7) . . ?
 O34 W9 O33 88.6(7) . . ?
 O34 W9 O35 86.6(8) . . ?
 O34 W9 O37 159.6(8) . . ?
 O34 W9 Yb1 42.4(5) . . ?
 O35 W9 K1 96.3(6) . . ?
 O35 W9 K3 132.3(6) . 2_565 ?
 O35 W9 K6 150.3(7) . . ?
 O35 W9 O28 76.2(7) . . ?
 O35 W9 O33 157.7(8) . . ?
 O35 W9 O37 91.1(8) . . ?
 O35 W9 Yb1 45.0(6) . . ?
 O37 W9 K1 38.5(6) . . ?
 O37 W9 K3 133.3(6) . 2_565 ?
 O37 W9 K6 89.1(6) . . ?
 O37 W9 O28 72.0(7) . . ?
 O37 W9 Yb1 135.1(6) . . ?
 O39 W9 K1 59.8(7) . . ?
 O39 W9 K3 61.3(8) . 2_565 ?
 O39 W9 K6 48.4(8) . . ?
 O39 W9 O28 169.9(8) . . ?
 O39 W9 O33 100.0(9) . . ?
 O39 W9 O34 102.1(9) . . ?
 O39 W9 O35 102.3(9) . . ?
 O39 W9 O37 98.2(9) . . ?
 O39 W9 Yb1 100.1(7) . . ?
 Yb1 W9 K1 134.52(17) . . ?
 Yb1 W9 K3 91.2(3) . 2_565 ?
 Yb1 W9 K6 132.7(3) . . ?
 K1 W10 K3 76.6(3) . 3 ?
 K1 W10 K4 129.1(3) . 3 ?
 K4 W10 K3 63.5(3) 3 3 ?
 O28 W10 K1 109.7(4) . . ?
 O28 W10 K3 151.2(5) . 3 ?
 O28 W10 K4 93.8(5) . 3 ?
 O31 W10 K1 166.4(5) . . ?
 O31 W10 K3 94.8(6) . 3 ?
 O31 W10 K4 52.2(6) . 3 ?
 O31 W10 O28 83.0(7) . . ?
 O31 W10 O32 81.6(8) . . ?
 O32 W10 K1 95.3(6) . . ?
 O32 W10 K3 128.2(6) . 3 ?
 O32 W10 K4 133.8(6) . 3 ?
 O32 W10 O28 80.1(7) . . ?
 O36 W10 K1 97.2(7) . . ?
 O36 W10 K3 73.4(7) . 3 ?
 O36 W10 K4 43.3(7) . 3 ?
 O36 W10 O28 77.9(8) . . ?
 O36 W10 O31 90.2(9) . . ?
 O36 W10 O32 157.3(9) . . ?
 O36 W10 O37 93.5(9) . . ?
 O37 W10 K1 37.7(6) . . ?
 O37 W10 K3 111.5(6) . 3 ?
 O37 W10 K4 136.8(6) . 3 ?
 O37 W10 O28 72.2(7) . . ?
 O37 W10 O31 153.5(8) . . ?
 O37 W10 O32 85.0(8) . . ?
 O40 W10 K1 62.9(8) . . ?
 O40 W10 K3 31.9(8) . 3 ?
 O40 W10 K4 92.3(8) . 3 ?
 O40 W10 O28 172.4(9) . . ?
 O40 W10 O31 104.3(9) . . ?
 O40 W10 O32 98.9(9) . . ?
 O40 W10 O36 103.7(10) . . ?
 O40 W10 O37 100.3(10) . . ?
 O24 Yb1 O24 78.7(9) 2_565 . ?
 O24 Yb1 O35 118.9(6) 2_565 2_565 ?
 O24 Yb1 O35 136.3(6) . 2_565 ?
 O24 Yb1 O35 118.9(6) . . ?
 O24 Yb1 O35 136.3(6) 2_565 . ?
 O24 Yb1 W4 110.4(4) . 2_565 ?
 O24 Yb1 W4 33.4(4) 2_565 2_565 ?
 O24 Yb1 W4 110.4(4) 2_565 . ?
 O24 Yb1 W4 33.4(4) . . ?
 O24 Yb1 W9 99.9(4) 2_565 2_565 ?
 O24 Yb1 W9 108.4(4) . 2_565 ?
 O24 Yb1 W9 99.9(4) . . ?
 O24 Yb1 W9 108.4(4) 2_565 . ?
 O29 Yb1 O24 65.6(6) 2_565 2_565 ?
 O29 Yb1 O24 142.9(6) 2_565 . ?
 O29 Yb1 O24 142.9(6) . 2_565 ?
 O29 Yb1 O24 65.6(6) . . ?
 O29 Yb1 O29 151.2(9) . 2_565 ?
 O29 Yb1 O35 73.8(7) . . ?
 O29 Yb1 O35 73.8(7) 2_565 2_565 ?
 O29 Yb1 O35 83.7(6) 2_565 . ?
 O29 Yb1 O35 83.7(6) . 2_565 ?
 O29 Yb1 W4 32.7(4) . . ?
 O29 Yb1 W4 32.7(4) 2_565 2_565 ?
 O29 Yb1 W4 176.0(5) . 2_565 ?
 O29 Yb1 W4 176.0(5) 2_565 . ?
 O29 Yb1 W9 83.0(5) 2_565 . ?
 O29 Yb1 W9 88.0(5) . . ?
 O29 Yb1 W9 83.0(5) . 2_565 ?
 O29 Yb1 W9 88.0(5) 2_565 2_565 ?
 O34 Yb1 O24 73.3(6) . . ?
 O34 Yb1 O24 83.5(6) 2_565 . ?
 O34 Yb1 O24 73.3(6) 2_565 2_565 ?
 O34 Yb1 O24 83.5(6) . 2_565 ?
 O34 Yb1 O29 92.4(6) . 2_565 ?
 O34 Yb1 O29 95.0(6) 2_565 2_565 ?
 O34 Yb1 O29 92.4(6) 2_565 . ?
 O34 Yb1 O29 95.0(6) . . ?
 O34 Yb1 O34 150.0(8) 2_565 . ?
 O34 Yb1 O35 66.8(6) 2_565 2_565 ?
 O34 Yb1 O35 142.9(6) 2_565 . ?
 O34 Yb1 O35 142.9(6) . 2_565 ?
 O34 Yb1 O35 66.8(6) . . ?
 O34 Yb1 W4 83.2(4) 2_565 . ?
 O34 Yb1 W4 87.5(4) 2_565 2_565 ?
 O34 Yb1 W4 83.2(4) . 2_565 ?
 O34 Yb1 W4 87.5(4) . . ?
 O34 Yb1 W9 176.4(4) 2_565 . ?
 O34 Yb1 W9 176.4(4) . 2_565 ?
 O34 Yb1 W9 33.4(4) 2_565 2_565 ?
 O34 Yb1 W9 33.4(4) . . ?
 O35 Yb1 O35 77.4(9) . 2_565 ?
 O35 Yb1 W4 108.6(5) . 2_565 ?
 O35 Yb1 W4 108.6(5) 2_565 . ?
 O35 Yb1 W4 99.9(5) . . ?
 O35 Yb1 W4 99.9(5) 2_565 2_565 ?
 O35 Yb1 W9 109.7(4) . 2_565 ?
 O35 Yb1 W9 34.0(4) . . ?
 O35 Yb1 W9 109.7(4) 2_565 . ?
 O35 Yb1 W9 34.0(4) 2_565 2_565 ?
 W4 Yb1 W4 143.37(6) 2_565 . ?
 W9 Yb1 W4 92.41(3) 2_565 . ?
 W9 Yb1 W4 92.41(3) . 2_565 ?
 W9 Yb1 W4 98.99(3) . . ?
 W9 Yb1 W4 98.99(3) 2_565 2_565 ?
 W9 Yb1 W9 143.20(6) 2_565 . ?

loop_
  _geom_torsion_atom_site_label_1
  _geom_torsion_atom_site_label_2
  _geom_torsion_atom_site_label_3
  _geom_torsion_atom_site_label_4
  _geom_torsion
  _geom_torsion_site_symmetry_1
  _geom_torsion_site_symmetry_2
  _geom_torsion_site_symmetry_3
  _geom_torsion_site_symmetry_4
  _geom_torsion_publ_flag
 Co1 O12 W1 K1 108.8(14) . . . 4_564 ?
 Co1 O12 W1 K4 -104.4(10) . . . . ?
 Co1 O12 W1 K5 -178.0(12) . . . 4_564 ?
 Co1 O12 W1 O1 -170.6(11) . . . . ?
 Co1 O12 W1 O4 85.1(12) . . . . ?
 Co1 O12 W1 O5 19(3) . . . . ?
 Co1 O12 W1 O7 -69.2(12) . . . . ?
 Co1 O12 W1 O25 1.6(10) . . . . ?
 Co1 O22 W8 K1 -143(2) . . . 4_564 ?
 Co1 O22 W8 K3 96.7(18) . . . 2_565 ?
 Co1 O22 W8 K6 91.1(17) . . . . ?
 Co1 O22 W8 O11 -112.8(18) . . . . ?
 Co1 O22 W8 O20 -44(4) . . . . ?
 Co1 O22 W8 O21 143.4(18) . . . . ?
 Co1 O22 W8 O27 -43.2(18) . . . . ?
 Co1 O22 W8 O33 39.0(18) . . . . ?
 Co1 O24 W4 K4 105.1(8) . . . . ?
 Co1 O24 W4 K5 -137.2(7) . . . 2_565 ?
 Co1 O24 W4 O7 64.1(10) . . . . ?
 Co1 O24 W4 O13 161.4(10) . . . . ?
 Co1 O24 W4 O14 -17(3) . . . . ?
 Co1 O24 W4 O25 -6.0(8) . . . . ?
 Co1 O24 W4 O29 -96.6(10) . . . . ?
 Co1 O24 W4 Yb1 -105.9(11) . . . . ?
 Co1 O25 P1 O26 177.0(10) . . . . ?
 Co1 O25 P1 O27 60.1(13) . . . . ?
 Co1 O25 P1 O28 -63.0(13) . . . . ?
 Co1 O34 W9 K1 -139.1(12) . . . . ?
 Co1 O34 W9 K3 -92.5(14) . . . 2_565 ?
 Co1 O34 W9 K6 -87.4(14) . . . . ?
 Co1 O34 W9 O28 44.9(14) . . . . ?
 Co1 O34 W9 O33 -37.1(15) . . . . ?
 Co1 O34 W9 O35 121.1(15) . . . . ?
 Co1 O34 W9 O37 37(3) . . . . ?
 Co1 O34 W9 O39 -137.0(15) . . . . ?
 Co1 O34 W9 Yb1 131.2(18) . . . . ?
 Co2 O28 P1 O25 -62.0(15) . . . . ?
 Co2 O28 P1 O26 57.7(15) . . . . ?
 Co2 O28 P1 O27 177.2(11) . . . . ?
 Co2 O29 W4 K4 -143.8(11) . . . . ?
 Co2 O29 W4 K5 -94.1(16) . . . 2_565 ?
 Co2 O29 W4 O7 39(3) . . . . ?
 Co2 O29 W4 O13 -136.7(16) . . . . ?
 Co2 O29 W4 O14 -37.5(16) . . . . ?
 Co2 O29 W4 O24 120.3(16) . . . . ?
 Co2 O29 W4 O25 44.0(15) . . . . ?
 Co2 O29 W4 Yb1 130(2) . . . . ?
 Co2 O30 W5 K4 -145(2) . . . 3 ?
 Co2 O30 W5 K5 97.2(17) . . . 2_565 ?
 Co2 O30 W5 O8 -43(4) . . . . ?
 Co2 O30 W5 O14 39.9(17) . . . . ?
 Co2 O30 W5 O15 145.9(17) . . . . ?
 Co2 O30 W5 O16 -113.1(17) . . . . ?
 Co2 O30 W5 O26 -41.8(17) . . . . ?
 Co2 O35 W9 K1 102.4(8) . . . . ?
 Co2 O35 W9 K3 -135.0(7) . . . 2_565 ?
 Co2 O35 W9 K6 154.3(7) . . . . ?
 Co2 O35 W9 O28 -7.0(8) . . . . ?
 Co2 O35 W9 O33 -18(3) . . . . ?
 Co2 O35 W9 O34 -95.6(10) . . . . ?
 Co2 O35 W9 O37 64.2(10) . . . . ?
 Co2 O35 W9 O39 162.8(10) . . . . ?
 Co2 O35 W9 Yb1 -105.1(11) . . . . ?
 Co2 O36 W10 K1 -105.9(11) . . . . ?
 Co2 O36 W10 K3 -179.5(13) . . . 3 ?
 Co2 O36 W10 K4 111.8(15) . . . 3 ?
 Co2 O36 W10 O28 2.8(10) . . . . ?
 Co2 O36 W10 O31 85.6(12) . . . . ?
 Co2 O36 W10 O32 17(3) . . . . ?
 Co2 O36 W10 O37 -68.1(12) . . . . ?
 Co2 O36 W10 O40 -169.6(12) . . . . ?
 K1 O4 W2 K2 121.3(6) 4_564 . . 7_444 ?
 K1 O4 W2 O2 75.8(10) 4_564 . . . ?
 K1 O4 W2 O6 175.9(8) 4_564 . . . ?
 K1 O4 W2 O10 -112(2) 4_564 . . . ?
 K1 O4 W2 O11 -26.7(8) 4_564 . . . ?
 K1 O4 W2 O27 -99.2(7) 4_564 . . . ?
 K1 O11 W2 K2 -52.7(14) 4_564 . . 7_444 ?
 K1 O11 W2 O2 -73.8(10) 4_564 . . . ?
 K1 O11 W2 O4 28.6(8) 4_564 . . . ?
 K1 O11 W2 O6 108(2) 4_564 . . . ?
 K1 O11 W2 O10 -175.2(9) 4_564 . . . ?
 K1 O11 W2 O27 111.7(8) 4_564 . . . ?
 K1 O12 W1 K4 146.7(7) 4_564 . . . ?
 K1 O12 W1 K5 73.2(7) 4_564 . . 4_564 ?
 K1 O12 W1 O1 80.6(11) 4_564 . . . ?
 K1 O12 W1 O4 -23.7(9) 4_564 . . . ?
 K1 O12 W1 O5 -90(3) 4_564 . . . ?
 K1 O12 W1 O7 -178.0(9) 4_564 . . . ?
 K1 O12 W1 O25 -107.3(9) 4_564 . . . ?
 K1 O22 W8 K3 -120.4(10) 4_564 . . 2_565 ?
 K1 O22 W8 K6 -126.0(7) 4_564 . . . ?
 K1 O22 W8 O11 30.1(9) 4_564 . . . ?
 K1 O22 W8 O20 99(3) 4_564 . . . ?
 K1 O22 W8 O21 -73.6(11) 4_564 . . . ?
 K1 O22 W8 O27 99.7(8) 4_564 . . . ?
 K1 O22 W8 O33 -178.1(9) 4_564 . . . ?
 K1 O37 W10 K3 -23.8(10) . . . 3 ?
 K1 O37 W10 K4 -97.5(10) . . . 3 ?
 K1 O37 W10 O28 -173.4(11) . . . . ?
 K1 O37 W10 O31 165.2(13) . . . . ?
 K1 O37 W10 O32 105.4(10) . . . . ?
 K1 O37 W10 O36 -97.4(10) . . . . ?
 K1 O37 W10 O40 7.3(12) . . . . ?
 K2 O2 W2 K1 121.0(8) 7_444 . . 4_564 ?
 K2 O2 W2 O4 72.8(10) 7_444 . . . ?
 K2 O2 W2 O6 -15.9(10) 7_444 . . . ?
 K2 O2 W2 O10 -104.1(9) 7_444 . . . ?
 K2 O2 W2 O11 165.0(8) 7_444 . . . ?
 K2 O3 W3 K6 62.3(8) 7_444 . . 7_444 ?
 K2 O3 W3 O5 -72.5(11) 7_444 . . . ?
 K2 O3 W3 O6 15.3(11) 7_444 . . . ?
 K2 O3 W3 O8 -167.9(9) 7_444 . . . ?
 K2 O3 W3 O9 101.7(10) 7_444 . . . ?
 K2 O6 W2 K1 -82.7(9) 7_444 . . 4_564 ?
 K2 O6 W2 O2 14.5(10) 7_444 . . . ?
 K2 O6 W2 O4 -87.3(7) 7_444 . . . ?
 K2 O6 W2 O10 115.4(8) 7_444 . . . ?
 K2 O6 W2 O11 -167.7(19) 7_444 . . . ?
 K2 O6 W2 O27 -170.9(7) 7_444 . . . ?
 K2 O21 W8 K1 -6(3) . . . 4_564 ?
 K2 O21 W8 K3 81(3) . . . 2_565 ?
 K2 O21 W8 K6 135(3) . . . . ?
 K2 O21 W8 O11 -57(3) . . . . ?
 K2 O21 W8 O20 -141(3) . . . . ?
 K2 O21 W8 O22 37(3) . . . . ?
 K2 O21 W8 O27 -117(3) . . . . ?
 K2 O21 W8 O33 133(3) . . . . ?
 K2 O40 W10 K1 98.8(15) 4_565 . . . ?
 K2 O40 W10 K3 -152(3) 4_565 . . 3 ?
 K2 O40 W10 K4 -127.7(14) 4_565 . . 3 ?
 K2 O40 W10 O31 -76.3(16) 4_565 . . . ?
 K2 O40 W10 O32 7.3(16) 4_565 . . . ?
 K2 O40 W10 O36 -170.0(14) 4_565 . . . ?
 K2 O40 W10 O37 93.8(15) 4_565 . . . ?
 K3 O13 W4 K4 104.5(19) . . . . ?
 K3 O13 W4 K5 -114(2) . . . 2_565 ?
 K3 O13 W4 O7 109.0(18) . . . . ?
 K3 O13 W4 O14 -164.1(18) . . . . ?
 K3 O13 W4 O24 17(2) . . . . ?
 K3 O13 W4 O25 105(4) . . . . ?
 K3 O13 W4 O29 -72.3(19) . . . . ?
 K3 O13 W4 Yb1 -29.1(19) . . . . ?
 K3 O21 W8 K1 -87.5(5) 2_565 . . 4_564 ?
 K3 O21 W8 K6 54.0(7) 2_565 . . . ?
 K3 O21 W8 O11 -138.3(7) 2_565 . . . ?
 K3 O21 W8 O20 138.1(7) 2_565 . . . ?
 K3 O21 W8 O22 -44.4(9) 2_565 . . . ?
 K3 O21 W8 O27 162(3) 2_565 . . . ?
 K3 O21 W8 O33 51.7(8) 2_565 . . . ?
 K3 O22 W8 K1 120.4(10) 2_565 . . 4_564 ?
 K3 O22 W8 K6 -5.6(7) 2_565 . . . ?
 K3 O22 W8 O11 150.5(7) 2_565 . . . ?
 K3 O22 W8 O20 -141(2) 2_565 . . . ?
 K3 O22 W8 O21 46.8(10) 2_565 . . . ?
 K3 O22 W8 O27 -139.9(6) 2_565 . . . ?
 K3 O22 W8 O33 -57.7(7) 2_565 . . . ?
 K3 O33 W8 K1 51.5(9) 2_565 . . 4_564 ?
 K3 O33 W8 K6 -53.3(6) 2_565 . . . ?
 K3 O33 W8 O11 149.7(15) 2_565 . . . ?
 K3 O33 W8 O20 -145.5(8) 2_565 . . . ?
 K3 O33 W8 O21 -51.1(10) 2_565 . . . ?
 K3 O33 W8 O22 53.6(8) 2_565 . . . ?
 K3 O33 W8 O27 143.2(7) 2_565 . . . ?
 K3 O34 W9 K1 -46.6(19) 2_565 . . . ?
 K3 O34 W9 K6 5.1(6) 2_565 . . . ?
 K3 O34 W9 O28 137.4(6) 2_565 . . . ?
 K3 O34 W9 O33 55.4(7) 2_565 . . . ?
 K3 O34 W9 O35 -146.4(7) 2_565 . . . ?
 K3 O34 W9 O37 130(2) 2_565 . . . ?
 K3 O34 W9 O39 -44.5(9) 2_565 . . . ?
 K3 O34 W9 Yb1 -136.3(9) 2_565 . . . ?
 K3 O39 W9 K1 -138.1(8) 2_565 . . . ?
 K3 O39 W9 K6 -53.9(7) 2_565 . . . ?
 K3 O39 W9 O28 -148(4) 2_565 . . . ?
 K3 O39 W9 O33 -48.0(8) 2_565 . . . ?
 K3 O39 W9 O34 42.7(8) 2_565 . . . ?
 K3 O39 W9 O35 131.7(7) 2_565 . . . ?
 K3 O39 W9 O37 -135.3(7) 2_565 . . . ?
 K3 O39 W9 Yb1 85.8(5) 2_565 . . . ?
 K3 O40 W10 K1 -109.4(16) 3 . . . ?
 K3 O40 W10 K4 24.1(14) 3 . . 3 ?
 K3 O40 W10 O31 75.6(15) 3 . . . ?
 K3 O40 W10 O32 159.2(14) 3 . . . ?
 K3 O40 W10 O36 -18.2(17) 3 . . . ?
 K3 O40 W10 O37 -114.4(15) 3 . . . ?
 K4 O13 W4 K5 141.2(9) . . . 2_565 ?
 K4 O13 W4 O7 4.6(8) . . . . ?
 K4 O13 W4 O14 91.4(8) . . . . ?
 K4 O13 W4 O24 -87.9(8) . . . . ?
 K4 O13 W4 O25 0(4) . . . . ?
 K4 O13 W4 O29 -176.8(7) . . . . ?
 K4 O13 W4 Yb1 -133.5(5) . . . . ?
 K4 O30 W5 K5 -117.4(10) 3 . . 2_565 ?
 K4 O30 W5 O8 102(3) 3 . . . ?
 K4 O30 W5 O14 -174.7(9) 3 . . . ?
 K4 O30 W5 O15 -68.7(11) 3 . . . ?
 K4 O30 W5 O16 32.3(9) 3 . . . ?
 K4 O30 W5 O26 103.6(8) 3 . . . ?
 K4 O31 W6 K6 163.5(4) 3 . . 7_444 ?
 K4 O31 W6 O9 -107.4(19) 3 . . . ?
 K4 O31 W6 O16 -25.4(8) 3 . . . ?
 K4 O31 W6 O17 75.6(9) 3 . . . ?
 K4 O31 W6 O18 176.6(8) 3 . . . ?
 K4 O31 W6 O26 -98.7(7) 3 . . . ?
 K4 O36 W10 K1 142.4(7) 3 . . . ?
 K4 O36 W10 K3 68.7(8) 3 . . 3 ?
 K4 O36 W10 O28 -109.0(9) 3 . . . ?
 K4 O36 W10 O31 -26.2(9) 3 . . . ?
 K4 O36 W10 O32 -95(2) 3 . . . ?
 K4 O36 W10 O37 -179.9(9) 3 . . . ?
 K4 O36 W10 O40 78.6(12) 3 . . . ?
 K5 O1 W1 K1 30.2(15) 4_564 . . 4_564 ?
 K5 O1 W1 K4 -103.3(16) 4_564 . . . ?
 K5 O1 W1 O4 79.6(16) 4_564 . . . ?
 K5 O1 W1 O5 162.3(15) 4_564 . . . ?
 K5 O1 W1 O7 -110.1(15) 4_564 . . . ?
 K5 O1 W1 O12 -14.4(18) 4_564 . . . ?
 K5 O13 W4 K4 -141.2(9) 2_565 . . . ?
 K5 O13 W4 O7 -136.6(7) 2_565 . . . ?
 K5 O13 W4 O14 -49.8(8) 2_565 . . . ?
 K5 O13 W4 O24 130.9(7) 2_565 . . . ?
 K5 O13 W4 O25 -141(3) 2_565 . . . ?
 K5 O13 W4 O29 42.0(8) 2_565 . . . ?
 K5 O13 W4 Yb1 85.3(5) 2_565 . . . ?
 K5 O14 W5 K4 48.7(9) 2_565 . . 3 ?
 K5 O14 W5 O8 -144.8(7) 2_565 . . . ?
 K5 O14 W5 O15 -49.7(9) 2_565 . . . ?
 K5 O14 W5 O16 151.6(16) 2_565 . . . ?
 K5 O14 W5 O26 144.2(6) 2_565 . . . ?
 K5 O14 W5 O30 54.1(7) 2_565 . . . ?
 K5 O15 W5 K4 -87.2(5) 2_565 . . 3 ?
 K5 O15 W5 O8 136.7(7) 2_565 . . . ?
 K5 O15 W5 O14 49.7(8) 2_565 . . . ?
 K5 O15 W5 O16 -140.1(8) 2_565 . . . ?
 K5 O15 W5 O26 165(3) 2_565 . . . ?
 K5 O15 W5 O30 -46.3(9) 2_565 . . . ?
 K5 O29 W4 K4 -49.7(19) 2_565 . . . ?
 K5 O29 W4 O7 133(2) 2_565 . . . ?
 K5 O29 W4 O13 -42.6(9) 2_565 . . . ?
 K5 O29 W4 O14 56.7(7) 2_565 . . . ?
 K5 O29 W4 O24 -145.5(8) 2_565 . . . ?
 K5 O29 W4 O25 138.1(6) 2_565 . . . ?
 K5 O29 W4 Yb1 -135.9(10) 2_565 . . . ?
 K5 O30 W5 K4 117.4(10) 2_565 . . 3 ?
 K5 O30 W5 O8 -140(2) 2_565 . . . ?
 K5 O30 W5 O14 -57.4(7) 2_565 . . . ?
 K5 O30 W5 O15 48.7(9) 2_565 . . . ?
 K5 O30 W5 O16 149.7(8) 2_565 . . . ?
 K5 O30 W5 O26 -139.0(6) 2_565 . . . ?
 K5 O39 W9 K1 106(3) . . . . ?
 K5 O39 W9 K3 -116(3) . . . 2_565 ?
 K5 O39 W9 K6 -169(3) . . . . ?
 K5 O39 W9 O28 96(5) . . . . ?
 K5 O39 W9 O33 -164(2) . . . . ?
 K5 O39 W9 O34 -73(2) . . . . ?
 K5 O39 W9 O35 16(3) . . . . ?
 K5 O39 W9 O37 109(2) . . . . ?
 K5 O39 W9 Yb1 -30(2) . . . . ?
 K6 O6 W2 K1 -170.3(4) 7_444 . . 4_564 ?
 K6 O6 W2 K2 -87.7(8) 7_444 . . 7_444 ?
 K6 O6 W2 O2 -73.2(10) 7_444 . . . ?
 K6 O6 W2 O4 -175.0(9) 7_444 . . . ?
 K6 O6 W2 O10 27.7(8) 7_444 . . . ?
 K6 O6 W2 O11 105(2) 7_444 . . . ?
 K6 O6 W2 O27 101.5(8) 7_444 . . . ?
 K6 O10 W2 K1 168.2(4) 7_444 . . 4_564 ?
 K6 O10 W2 K2 21.4(9) 7_444 . . 7_444 ?
 K6 O10 W2 O2 70.9(11) 7_444 . . . ?
 K6 O10 W2 O4 -101(2) 7_444 . . . ?
 K6 O10 W2 O6 -29.2(9) 7_444 . . . ?
 K6 O10 W2 O11 173.1(9) 7_444 . . . ?
 K6 O10 W2 O27 -114.6(9) 7_444 . . . ?
 K6 O18 W6 K4 -164.0(5) 7_444 . . 3 ?
 K6 O18 W6 O9 34.8(8) 7_444 . . . ?
 K6 O18 W6 O16 113(2) 7_444 . . . ?
 K6 O18 W6 O17 -65.6(10) 7_444 . . . ?
 K6 O18 W6 O26 108.2(8) 7_444 . . . ?
 K6 O18 W6 O31 -167.7(8) 7_444 . . . ?
 K6 O21 W8 K1 -141.4(8) . . . 4_564 ?
 K6 O21 W8 K3 -54.0(7) . . . 2_565 ?
 K6 O21 W8 O11 167.7(8) . . . . ?
 K6 O21 W8 O20 84.1(9) . . . . ?
 K6 O21 W8 O22 -98.3(10) . . . . ?
 K6 O21 W8 O27 108(3) . . . . ?
 K6 O21 W8 O33 -2.3(11) . . . . ?
 K6 O33 W8 K1 104.8(8) . . . 4_564 ?
 K6 O33 W8 K3 53.3(6) . . . 2_565 ?
 K6 O33 W8 O11 -157.0(14) . . . . ?
 K6 O33 W8 O20 -92.2(8) . . . . ?
 K6 O33 W8 O21 2.2(10) . . . . ?
 K6 O33 W8 O22 106.9(9) . . . . ?
 K6 O33 W8 O27 -163.5(7) . . . . ?
 K6 O39 W9 K1 -84.1(8) . . . . ?
 K6 O39 W9 K3 53.9(7) . . . 2_565 ?
 K6 O39 W9 O28 -94(5) . . . . ?
 K6 O39 W9 O33 5.9(10) . . . . ?
 K6 O39 W9 O34 96.6(9) . . . . ?
 K6 O39 W9 O35 -174.4(8) . . . . ?
 K6 O39 W9 O37 -81.4(9) . . . . ?
 K6 O39 W9 Yb1 139.8(6) . . . . ?
 W1 O4 W2 K1 151(3) . . . 4_564 ?
 W1 O4 W2 K2 -88(2) . . . 7_444 ?
 W1 O4 W2 O2 -133(2) . . . . ?
 W1 O4 W2 O6 -33(2) . . . . ?
 W1 O4 W2 O10 39(4) . . . . ?
 W1 O4 W2 O11 124(3) . . . . ?
 W1 O4 W2 O27 52(2) . . . . ?
 W1 O5 W3 K2 83(3) . . . 7_444 ?
 W1 O5 W3 K6 34(3) . . . 7_444 ?
 W1 O5 W3 O3 128(3) . . . . ?
 W1 O5 W3 O6 29(3) . . . . ?
 W1 O5 W3 O8 -129(3) . . . . ?
 W1 O5 W3 O9 -38(4) . . . . ?
 W1 O5 W3 O26 -55(3) . . . . ?
 W1 O25 P1 O26 62.3(14) . . . . ?
 W1 O25 P1 O27 -54.6(14) . . . . ?
 W1 O25 P1 O28 -177.7(11) . . . . ?
 W2 O27 P1 O25 59.7(15) . . . . ?
 W2 O27 P1 O26 -58.1(15) . . . . ?
 W2 O27 P1 O28 -178.7(11) . . . . ?
 W3 O6 W2 K1 32(3) . . . 4_564 ?
 W3 O6 W2 K2 115(2) . . . 7_444 ?
 W3 O6 W2 O2 129(2) . . . . ?
 W3 O6 W2 O4 27(2) . . . . ?
 W3 O6 W2 O10 -130(2) . . . . ?
 W3 O6 W2 O11 -53(4) . . . . ?
 W3 O6 W2 O27 -56(2) . . . . ?
 W3 O26 P1 O25 -56.8(14) . . . . ?
 W3 O26 P1 O27 60.6(14) . . . . ?
 W3 O26 P1 O28 -177.0(11) . . . . ?
 W4 O14 W5 K4 -28(3) . . . 3 ?
 W4 O14 W5 K5 -76.2(19) . . . 2_565 ?
 W4 O14 W5 O8 139(2) . . . . ?
 W4 O14 W5 O15 -126(2) . . . . ?
 W4 O14 W5 O16 75(3) . . . . ?
 W4 O14 W5 O26 68(2) . . . . ?
 W4 O14 W5 O30 -22(2) . . . . ?
 W4 O25 P1 O26 -63.2(13) . . . . ?
 W4 O25 P1 O27 179.9(10) . . . . ?
 W4 O25 P1 O28 56.7(14) . . . . ?
 W5 O8 W3 K2 169.1(4) . . . 7_444 ?
 W5 O8 W3 K6 -80.8(14) . . . 7_444 ?
 W5 O8 W3 O3 -173.7(13) . . . . ?
 W5 O8 W3 O5 82.8(13) . . . . ?
 W5 O8 W3 O6 -2(3) . . . . ?
 W5 O8 W3 O9 -73.0(13) . . . . ?
 W5 O8 W3 O26 -0.4(11) . . . . ?
 W5 O26 P1 O25 61.6(13) . . . . ?
 W5 O26 P1 O27 179.0(10) . . . . ?
 W5 O26 P1 O28 -58.6(13) . . . . ?
 W6 O26 P1 O25 -179.1(10) . . . . ?
 W6 O26 P1 O27 -61.7(14) . . . . ?
 W6 O26 P1 O28 60.7(14) . . . . ?
 W7 O10 W2 K1 -70.2(15) . . . 4_564 ?
 W7 O10 W2 K2 143.0(10) . . . 7_444 ?
 W7 O10 W2 O2 -167.5(13) . . . . ?
 W7 O10 W2 O4 20(3) . . . . ?
 W7 O10 W2 O6 92.4(13) . . . . ?
 W7 O10 W2 O11 -65.3(13) . . . . ?
 W7 O10 W2 O27 7.0(11) . . . . ?
 W7 O18 W6 K4 33(3) . . . 3 ?
 W7 O18 W6 K6 -163(3) . . . 7_444 ?
 W7 O18 W6 O9 -129(2) . . . . ?
 W7 O18 W6 O16 -50(4) . . . . ?
 W7 O18 W6 O17 131(2) . . . . ?
 W7 O18 W6 O26 -55(2) . . . . ?
 W7 O18 W6 O31 29(2) . . . . ?
 W7 O27 P1 O25 -178.7(10) . . . . ?
 W7 O27 P1 O26 63.5(14) . . . . ?
 W7 O27 P1 O28 -57.1(14) . . . . ?
 W8 O11 W2 K1 -110.9(15) . . . 4_564 ?
 W8 O11 W2 K2 -163.6(5) . . . 7_444 ?
 W8 O11 W2 O2 175.3(13) . . . . ?
 W8 O11 W2 O4 -82.3(13) . . . . ?
 W8 O11 W2 O6 -3(3) . . . . ?
 W8 O11 W2 O10 73.9(13) . . . . ?
 W8 O11 W2 O27 0.8(11) . . . . ?
 W8 O20 W7 K6 -83.7(14) . . . 7_444 ?
 W8 O20 W7 O10 -71.2(13) . . . . ?
 W8 O20 W7 O18 1(3) . . . . ?
 W8 O20 W7 O19 -172.5(13) . . . . ?
 W8 O20 W7 O27 -0.9(11) . . . . ?
 W8 O20 W7 O32 82.5(13) . . . . ?
 W8 O27 P1 O25 -63.2(13) . . . . ?
 W8 O27 P1 O26 178.9(10) . . . . ?
 W8 O27 P1 O28 58.3(14) . . . . ?
 W9 O28 P1 O25 62.5(14) . . . . ?
 W9 O28 P1 O26 -177.8(10) . . . . ?
 W9 O28 P1 O27 -58.3(15) . . . . ?
 W9 O33 W8 K1 -24(3) . . . 4_564 ?
 W9 O33 W8 K3 -76(2) . . . 2_565 ?
 W9 O33 W8 K6 -129(2) . . . . ?
 W9 O33 W8 O11 74(3) . . . . ?
 W9 O33 W8 O20 139(2) . . . . ?
 W9 O33 W8 O21 -127(2) . . . . ?
 W9 O33 W8 O22 -22(2) . . . . ?
 W9 O33 W8 O27 67(2) . . . . ?
 W9 O37 W10 K1 166.3(19) . . . . ?
 W9 O37 W10 K3 142.4(10) . . . 3 ?
 W9 O37 W10 K4 68.8(15) . . . 3 ?
 W9 O37 W10 O28 -7.2(10) . . . . ?
 W9 O37 W10 O31 -28(3) . . . . ?
 W9 O37 W10 O32 -88.3(13) . . . . ?
 W9 O37 W10 O36 68.9(13) . . . . ?
 W9 O37 W10 O40 173.5(13) . . . . ?
 W10 O28 P1 O25 -177.8(10) . . . . ?
 W10 O28 P1 O26 -58.1(14) . . . . ?
 W10 O28 P1 O27 61.5(15) . . . . ?
 W10 O31 W6 K4 152(3) . . . 3 ?
 W10 O31 W6 K6 -45(3) . . . 7_444 ?
 W10 O31 W6 O9 44(4) . . . . ?
 W10 O31 W6 O16 126(2) . . . . ?
 W10 O31 W6 O17 -133(2) . . . . ?
 W10 O31 W6 O18 -32(2) . . . . ?
 W10 O31 W6 O26 53(2) . . . . ?
 W10 O32 W7 K6 34(3) . . . 7_444 ?
 W10 O32 W7 O10 -42(4) . . . . ?
 W10 O32 W7 O18 25(3) . . . . ?
 W10 O32 W7 O19 123(3) . . . . ?
 W10 O32 W7 O20 -134(3) . . . . ?
 W10 O32 W7 O27 -59(3) . . . . ?
 Yb1 O24 W4 K4 -149.0(6) . . . . ?
 Yb1 O24 W4 K5 -31.3(11) . . . 2_565 ?
 Yb1 O24 W4 O7 170.0(8) . . . . ?
 Yb1 O24 W4 O13 -92.7(9) . . . . ?
 Yb1 O24 W4 O14 89(2) . . . . ?
 Yb1 O24 W4 O25 99.9(7) . . . . ?
 Yb1 O24 W4 O29 9.3(8) . . . . ?
 Yb1 O29 W4 K4 86.2(17) . . . . ?
 Yb1 O29 W4 K5 135.9(10) . . . 2_565 ?
 Yb1 O29 W4 O7 -91(2) . . . . ?
 Yb1 O29 W4 O13 93.3(9) . . . . ?
 Yb1 O29 W4 O14 -167.5(8) . . . . ?
 Yb1 O29 W4 O24 -9.7(8) . . . . ?
 Yb1 O29 W4 O25 -86.0(7) . . . . ?
 Yb1 O34 W9 K1 89.8(17) . . . . ?
 Yb1 O34 W9 K3 136.3(9) . . . 2_565 ?
 Yb1 O34 W9 K6 141.4(6) . . . . ?
 Yb1 O34 W9 O28 -86.3(7) . . . . ?
 Yb1 O34 W9 O33 -168.3(8) . . . . ?
 Yb1 O34 W9 O35 -10.0(8) . . . . ?
 Yb1 O34 W9 O37 -94(2) . . . . ?
 Yb1 O34 W9 O39 91.8(10) . . . . ?
 Yb1 O35 W9 K1 -152.5(6) . . . . ?
 Yb1 O35 W9 K3 -29.8(12) . . . 2_565 ?
 Yb1 O35 W9 K6 -100.6(12) . . . . ?
 Yb1 O35 W9 O28 98.2(8) . . . . ?
 Yb1 O35 W9 O33 87(2) . . . . ?
 Yb1 O35 W9 O34 9.6(8) . . . . ?
 Yb1 O35 W9 O37 169.3(8) . . . . ?
 Yb1 O35 W9 O39 -92.0(10) . . . . ?

_shelx_SHELXL_version_number      '2014/7'
_iucr_refine_instructions_details
;

    fhrg50.res created by SHELXL-2014/7

TITL SIR92 run in space group I b a 2
CELL 0.71073 27.206727 19.71893 18.637939 90 90 90
ZERR 4 0.000811 0.00054 0.00045 0 0 0
LATT -2
SYMM -X,-Y,+Z
SYMM -X,+Y,0.5+Z
SYMM +X,-Y,0.5+Z
SFAC Co K O P W Yb
UNIT 16 41.6 352 8 80 4
 
L.S. 10
PLAN  15
TEMP 25
MORE -1
BOND
BOND $H
CONF
fmap 2
acta 52.0
MERG 2
TWIN -1 0 0 0 -1 0 0 0 -1 2
REM <olex2.extras>
REM <HklSrc "%.\\FHRG50.hkl">
REM </olex2.extras>
 
WGHT    0.049500  433.840698
BASF   0.13023
FVAR       0.21744
CO1   1   -0.082300    0.449443    0.689792    11.00000    0.02184    0.03320 =
         0.02338    0.00087   -0.00009   -0.00362
CO2   1   -0.039332    0.387755    0.940994    11.00000    0.03536    0.02533 =
         0.02147   -0.00069    0.00045   -0.00580
K1    2   -0.181286    0.580139    1.047317    11.00000    0.10060    0.06527 =
         0.05410   -0.01061    0.00220    0.01696
K2    2   -0.283196    0.603757    0.612175    11.00000    0.08438    0.08970 =
         0.11959    0.01949    0.01402    0.02486
K3    2    0.150114    0.385702    0.714948    10.60000    0.08355    0.11976 =
         0.04311   -0.02315    0.01337   -0.06457
K4    2    0.059277    0.254397    0.587853    11.00000    0.12354    0.14885 =
         0.07226    0.00401    0.00717    0.05134
K5    2   -0.081336    0.711726    0.914421    10.60000    0.07361
K6    2   -0.226864    0.636189    0.828040    11.00000    0.13666    0.11920 =
         0.13448   -0.00354    0.00026    0.06450
O1    3   -0.077389    0.248661    0.557585    11.00000    0.04862
O2    3   -0.253571    0.247202    0.629105    11.00000    0.04639
O3    3   -0.137327    0.086523    0.726034    11.00000    0.05622
O4    3   -0.157696    0.297134    0.644794    11.00000    0.03197
O5    3   -0.096577    0.211102    0.698332    11.00000    0.03186
O6    3   -0.188069    0.207210    0.735811    11.00000    0.03453
O7    3   -0.020459    0.293892    0.672154    11.00000    0.03323
O8    3   -0.071220    0.146170    0.818837    11.00000    0.03631
O9    3   -0.164909    0.145453    0.855889    11.00000    0.03252
O10   3   -0.260708    0.284541    0.773671    11.00000    0.03857
O11   3   -0.231952    0.377605    0.680773    11.00000    0.03583
O12   3   -0.084069    0.380719    0.608607    11.00000    0.04345
O13   3    0.064113    0.327828    0.747348    11.00000    0.03493
O14   3   -0.014181    0.256789    0.809706    11.00000    0.03018
O15   3    0.003784    0.159908    0.921131    11.00000    0.03986
O16   3   -0.096834    0.182277    0.949968    11.00000    0.04036
O17   3   -0.192522    0.158099    1.001500    11.00000    0.04478
O18   3   -0.218690    0.252598    0.895110    11.00000    0.03434
O19   3   -0.305543    0.325510    0.903952    11.00000    0.05589
O20   3   -0.258295    0.414750    0.812132    11.00000    0.03586
O21   3   -0.244973    0.518783    0.712520    11.00000    0.04942
O22   3   -0.156084    0.461586    0.684667    11.00000    0.03626
O23   3   -0.061680    0.533695    0.630254    11.00000    0.04903
O24   3   -0.009204    0.424775    0.717101    11.00000    0.02770
O25   3   -0.087174    0.347628    0.752375    11.00000    0.02300
O26   3   -0.118295    0.261301    0.841238    11.00000    0.02778
O27   3   -0.176892    0.345356    0.786570    11.00000    0.02964
O28   3   -0.111307    0.383229    0.876154    11.00000    0.02836
O29   3    0.000013    0.386821    0.846314    11.00000    0.02946
O30   3   -0.033206    0.286170    0.945932    11.00000    0.03263
O31   3   -0.152607    0.289911    0.985384    11.00000    0.02666
O32   3   -0.211943    0.377331    0.930265    11.00000    0.03016
O33   3   -0.176103    0.488414    0.819818    11.00000    0.02917
O34   3   -0.081399    0.502770    0.783716    11.00000    0.02390
O35   3   -0.054094    0.489507    0.915152    11.00000    0.03128
O36   3   -0.089323    0.386776    1.020626    11.00000    0.04200
O37   3   -0.150480    0.477333    0.958459    11.00000    0.03380
O38   3    0.022477    0.413722    0.999890    11.00000    0.05472
O39   3   -0.120988    0.594499    0.883689    11.00000    0.04516
O40   3   -0.183647    0.401619    1.073888    11.00000    0.04475
O41   3   -0.258010    0.535888    0.924286    11.00000    0.13638
O42   3   -0.185479    0.689891    0.959979    11.00000    0.08838
O43   3   -0.107742    0.804905    0.796411    11.00000    0.12557
O44   3    0.145211    0.244085    0.654564    11.00000    0.09616
P1    4   -0.123233    0.335678    0.815165    11.00000    0.01941    0.01341 =
         0.01904    0.00549    0.00037    0.00159
W1    5   -0.086245    0.292281    0.635837    11.00000    0.03204    0.03670 =
         0.02519   -0.00476    0.00190   -0.00636
W2    5   -0.217615    0.284732    0.693539    11.00000    0.02714    0.03940 =
         0.03361   -0.00072   -0.00531   -0.00845
W3    5   -0.128814    0.160397    0.767278    11.00000    0.03606    0.02624 =
         0.03670   -0.00340   -0.00173   -0.00787
W4    5    0.001890    0.340809    0.759831    11.00000    0.02180    0.02774 =
         0.03152   -0.00474    0.00097   -0.00103
W5    5   -0.041365    0.212934    0.891044    11.00000    0.03398    0.02499 =
         0.03888    0.00260   -0.00609   -0.00173
W6    5   -0.164285    0.207526    0.936473    11.00000    0.03691    0.02871 =
         0.03369    0.00399   -0.00138   -0.01063
W7    5   -0.250163    0.335111    0.862820    11.00000    0.02350    0.03651 =
         0.03880    0.00088    0.00348   -0.00789
W8    5   -0.208675    0.453526    0.739196    11.00000    0.02101    0.03587 =
         0.03917    0.00605   -0.00188   -0.00122
W9    5   -0.114938    0.507464    0.871474    11.00000    0.02347    0.02418 =
         0.03121   -0.00120    0.00499   -0.00220
W10   5   -0.153528    0.387563    0.994988    11.00000    0.03443    0.03411 =
         0.02488   -0.00344    0.00556   -0.00923
YB1   6    0.000000    0.500000    0.815592    10.50000    0.02171    0.02546 =
         0.02312    0.00000    0.00000   -0.00350
HKLF 4
 
REM  SIR92 run in space group I b a 2
REM R1 =  0.0523 for   10301 Fo > 4sig(Fo)  and  0.0733 for all   12643 data
REM    349 parameters refined using      1 restraints
 
END  
     
WGHT      0.0495    433.6466 

REM Highest difference peak  3.608,  deepest hole -2.104,  1-sigma level  0.410
Q1    1  -0.1012  0.7321  0.9048  11.00000  0.05    3.61
Q2    1  -0.1169  0.5084  0.9169  11.00000  0.05    3.46
Q3    1  -0.1528  0.3891  1.0415  11.00000  0.05    3.04
Q4    1  -0.1139  0.5084  0.8218  11.00000  0.05    2.94
Q5    1  -0.2196  0.2838  0.7390  11.00000  0.05    2.92
Q6    1  -0.0416  0.2141  0.9389  11.00000  0.05    2.83
Q7    1   0.0015  0.3407  0.7196  11.00000  0.05    2.79
Q8    1  -0.0693  0.6995  0.9238  11.00000  0.05    2.71
Q9    1  -0.0400  0.2112  0.8416  11.00000  0.05    2.67
Q10   1  -0.2500  0.3354  0.8181  11.00000  0.05    2.66
Q11   1   0.0000  0.5000  0.7720  10.50000  0.05    2.62
Q12   1  -0.2494  0.3349  0.9150  11.00000  0.05    2.58
Q13   1  -0.1654  0.2062  0.8963  11.00000  0.05    2.56
Q14   1  -0.1532  0.3904  0.9475  11.00000  0.05    2.51
Q15   1  -0.0855  0.2920  0.6804  11.00000  0.05    2.45

  REM The information below was added by Olex2.
  REM
  REM R1 = 0.0523 for 10301 Fo > 4sig(Fo) and 0.0733 for all 71294 data
  REM n/a parameters refined using n/a restraints
  REM Highest difference peak 3.61, deepest hole -2.10
  REM Mean Shift 0, Max Shift 0.001.
  
  REM +++ Tabular Listing of Refinement Information +++
  REM R1_all = 0.0733
  REM R1_gt = 0.0523
  REM wR_ref = 0.1291
  REM GOOF = 1.043
  REM Shift_max = 0.001
  REM Shift_mean = 0
  REM Reflections_all = 71294
  REM Reflections_gt = 10301
  REM Parameters = n/a
  REM Hole = -2.10
  REM Peak = 3.61
  REM Flack = n/a
  
  
;
_olex2_submission_special_instructions 'No special instructions were received'
loop_
  _refln_index_h
  _refln_index_k
  _refln_index_l
  _refln_F_squared_meas
  _refln_F_squared_sigma
  _refln_scale_group_code
 0 0 -22 11467.4 1955.25 5
 0 0 -20 6275.53 1320.01 5
 0 0 -18 25171.7 2612.56 5
 0 0 -18 26218.5 1798.94 3
 0 0 -16 136244 5374.36 5
 0 0 -16 129639 3792.96 3
 0 0 -14 3489.39 575.355 3
 0 0 -14 3987.72 873.647 5
 0 0 -12 13313 1513.34 5
 0 0 -12 12447 1004.17 3
 0 0 -10 14430.4 1317 5
 0 0 -10 15076.2 1006.97 3
 0 0 -8 84991.7 2809.58 5
 0 0 -8 77518.7 2008.83 3
 0 0 -6 27589.6 1372.56 5
 0 0 -6 23226.3 939.612 3
 0 0 -6 25196.1 1178.6 2
 0 0 -4 59810.1 1265.68 3
 0 0 -4 61057.5 1746.06 5
 0 0 -4 61028.1 1613.09 4
 0 0 -4 63153.7 1500.61 2
 0 0 4 63196.1 1726.31 5
 0 0 4 60419.6 1541.47 4
 0 0 4 60311.6 1238.5 3
 0 0 4 61232.9 1468.99 2
 0 0 6 22589 1154.78 4
 0 0 6 22256.2 662.953 1
 0 0 6 23263.2 1257.4 7
 0 0 6 25346.2 984.981 3
 0 0 6 22019.3 1271.69 5
 0 0 6 24643.4 1151.14 2
 0 0 8 77381.3 2016.45 3
 0 0 8 70011.4 1328.49 1
 0 0 8 78270 2485.79 4
 0 0 8 78899.6 2741.07 7
 0 0 10 14446.2 982.806 3
 0 0 10 13173.8 631.293 1
 0 0 10 14327.3 1190.08 4
 0 0 12 12773.2 1237.2 4
 0 0 12 11727.2 615.836 1
 0 0 14 2754.88 612.538 4
 0 0 14 3148.72 317.889 1
 0 0 16 132910 4593.64 4
 0 0 18 26258.1 2154.74 4
 0 0 20 6910.73 1184.36 4
 0 0 22 11312.1 1586.32 4
 0 0 24 4476.47 1104.14 4
 0 -1 -23 328.831 611.213 5
 0 1 -23 888.923 826.747 5
 0 -1 -21 -478.184 594.17 5
 0 1 -21 -310.564 546.842 5
 0 -1 -19 -1754.53 700.643 5
 0 1 -19 -132.625 260.795 3
 0 1 -19 -1881.86 732.117 5
 0 1 -17 571.753 377.595 3
 0 1 -17 482.172 517.673 5
 0 -1 -17 1318.12 681.326 5
 0 1 -15 85.5881 237.8 3
 0 -1 -15 340.127 502.203 5
 0 1 -15 393.155 423.981 5
 0 1 -13 5.66116 220.92 5
 0 -1 -13 198.006 227.127 5
 0 -1 -13 98.4867 133.453 3
 0 1 -13 62.3876 82.9769 3
 0 1 -11 83.2966 61.2654 3
 0 1 -11 -192.746 312.241 5
 0 -1 -11 253.528 195.386 3
 0 -1 -11 -112.249 120.101 5
 0 -1 -9 204.095 171.986 5
 0 1 -9 -127.673 101.939 3
 0 -1 -9 51.0702 81.2274 2
 0 1 -9 -45.8154 153.784 5
 0 -1 -9 -2.46482 118.34 3
 0 1 -9 161.233 171.941 4
 0 1 -7 104.002 53.7629 3
 0 -1 -7 95.7188 211.404 5
 0 -1 -7 245.747 184.821 2
 0 1 -7 -5.05683 124.605 4
 0 -1 -7 180.732 111.451 3
 0 1 -7 197.737 107.796 5
 0 1 -5 147.25 70.7193 3
 0 -1 -5 48.1413 62.7505 1
 0 -1 -5 26.489 120.921 5
 0 1 -5 124.922 138.624 5
 0 -1 -5 85.8322 79.6104 3
 0 1 -5 -41.7045 65.1723 4
 0 -1 -5 84.6757 102.948 2
 0 1 -3 -33.8226 82.5304 5
 0 1 3 156.248 80.3728 2
 0 -1 3 123.114 67.2095 3
 0 1 3 180.91 68.5207 3
 0 1 3 169.941 87.7943 5
 0 -1 3 99.1222 73.0243 4
 0 1 3 124.255 73.651 1
 0 1 5 -79.9387 62.2796 7
 0 -1 5 121.344 87.238 2
 0 1 5 115.7 62.4354 1
 0 1 5 272.078 150.501 4
 0 1 5 38.1712 90.4553 2
 0 -1 5 178.576 118.217 5
 0 1 5 155.316 91.8364 3
 0 1 5 -28.1024 80.8246 5
 0 -1 5 42.4098 81.1274 3
 0 -1 5 25.08 66.7404 4
 0 1 7 216.442 118.983 3
 0 1 7 144.102 131.072 7
 0 -1 7 133.918 164.292 7
 0 1 7 113.484 100.829 1
 0 -1 7 96.6281 49.8039 1
 0 -1 7 123.381 115.083 2
 0 -1 7 175.009 108.846 3
 0 1 7 -17.9611 91.5277 5
 0 1 7 31.2991 90.9665 2
 0 -1 7 96.3612 78.3552 4
 0 -1 7 171.295 93.4707 5
 0 1 9 54.0313 65.4746 1
 0 1 9 123.985 167.687 4
 0 -1 9 97.9929 64.8363 1
 0 -1 9 305.904 152.557 4
 0 -1 9 78.5307 76.7854 3
 0 1 9 23.8148 42.6885 3
 0 1 11 288.839 264.079 4
 0 -1 11 -96.8695 200.492 4
 0 1 11 16.7828 39.5091 1
 0 -1 11 87.2517 57.192 1
 0 -1 13 -175.19 210.039 4
 0 1 13 139.702 97.7616 1
 0 1 13 151.953 143.998 4
 0 -1 15 224.347 278.735 4
 0 1 15 -54.9305 76.0126 1
 0 1 15 -165.487 201.599 4
 0 1 17 -4.65767 216.736 4
 0 -1 17 247.963 252.112 4
 0 1 19 -121.681 343.58 4
 0 -1 19 -169.406 292.346 4
 0 -1 21 68.2685 128.441 4
 0 1 21 339.604 359.005 4
 0 -1 23 63.9899 386.449 4
 0 1 23 5.7385 382.823 4
 0 1 25 637.651 438.586 4
 0 -2 -22 6948.72 1523.96 5
 0 2 -22 5547.89 1415.75 5
 0 2 -20 9311.7 1650.15 5
 0 -2 -20 7441.94 1425.74 5
 0 2 -20 8844.54 1138.29 3
 0 2 -18 -177.852 313.034 5
 0 2 -18 -73.5284 237.728 3
 0 -2 -18 -19.1808 378.845 5
 0 -2 -16 30267.6 2551.82 5
 0 2 -16 29864.7 1883.9 3
 0 2 -16 34904.9 2761.89 5
 0 -2 -14 31029.1 2335.33 5
 0 2 -14 30316.6 2373.97 5
 0 2 -14 29131.8 1699.17 3
 0 2 -12 15438.9 1522.05 5
 0 2 -12 14588.6 1121.42 3
 0 -2 -12 14530.4 1450.47 5
 0 -2 -12 14818 1343.49 2
 0 -2 -10 1459.35 390.517 2
 0 -2 -10 1363.41 388.479 5
 0 2 -10 1579.04 336.35 3
 0 2 -10 930.876 395.529 5
 0 2 -8 33322.9 1400.25 3
 0 -2 -8 35028.8 1668.82 2
 0 -2 -8 33352.8 1715.94 5
 0 2 -8 37123 1731.76 4
 0 2 -8 35872.9 1862.89 5
 0 -2 -8 34136.9 1200.51 1
 0 2 -6 30733 1204.27 3
 0 -2 -6 27967.4 1027.88 1
 0 2 -6 31862.7 1530.77 5
 0 2 -6 31363.3 1321.03 4
 0 -2 -6 30226.6 1391.13 5
 0 -2 -6 30894.8 1364.92 2
 0 -2 -4 72701.5 1525.79 1
 0 2 -4 73970.4 1600.28 4
 0 -2 -4 74707.1 1744.07 5
 0 -2 -4 73978.9 1791.84 2
 0 2 -4 76884.9 1919.49 5
 0 2 -4 75193.3 1675.55 3
 0 -2 2 1074.49 137.244 4
 0 -2 2 1181.16 151.19 1
 0 2 2 1022.75 141.703 5
 0 2 4 74482.9 1766.08 2
 0 2 4 69736 1439.57 3
 0 -2 4 71030.4 1638.32 3
 0 -2 4 68080.2 1121.3 1
 0 -2 4 73981.4 1870.76 5
 0 -2 4 73623.4 1455.17 4
 0 2 4 72965.5 1711.83 5
 0 2 4 73794.5 2012.93 7
 0 2 4 72381.9 1513.82 1
 0 2 6 32290.9 1107.84 1
 0 -2 6 29738.4 1450.64 5
 0 -2 6 32272.5 1211.86 4
 0 2 6 31467.7 1113.41 3
 0 2 6 32660.6 1617.86 4
 0 2 6 32698 1378.67 2
 0 -2 6 32077.3 1225.71 3
 0 2 6 32194.2 1410.43 5
 0 2 6 30443.7 1551.23 7
 0 -2 8 32242.9 1436.89 4
 0 -2 8 32173.3 1623.06 7
 0 2 8 34321.9 1857.63 4
 0 2 8 32445.8 1304.03 3
 0 -2 8 33108.8 1395.44 3
 0 2 8 31633.8 1196.1 1
 0 2 10 1276.74 263.879 1
 0 -2 10 1143.87 302.174 3
 0 2 10 1520.83 450.816 4
 0 -2 10 1227.12 333.164 4
 0 2 10 1293.8 300.877 3
 0 2 12 11683.2 827.284 1
 0 2 12 14324.7 1437.08 4
 0 -2 12 13473.4 1154.25 4
 0 -2 14 32580.1 1960.44 4
 0 2 14 28168.7 1302.75 1
 0 2 14 31728.6 2252.18 4
 0 -2 16 31173 2071.76 4
 0 2 16 29683.7 2364.57 4
 0 -2 18 -256.257 192.966 4
 0 2 18 -84.314 192.784 4
 0 2 20 6295.57 1182.99 4
 0 -2 20 8579.09 1208.72 4
 0 -2 22 6981.57 1180.58 4
 0 2 22 6284.21 1225.4 4
 0 2 24 8318.19 1512.39 4
 0 -2 24 10511 1695.97 6
 0 -3 -23 1631.97 813.386 5
 0 3 -23 106.291 350.893 5
 0 3 -21 -107.758 223.341 5
 0 -3 -21 -574.714 598.562 5
 0 3 -19 -275.985 357.611 5
 0 3 -19 -184.985 123.371 3
 0 3 -17 -111.067 226.647 3
 0 3 -17 -368.003 495.942 5
 0 -3 -17 90.1445 235.972 5
 0 3 -15 5.51647 138.662 3
 0 -3 -15 196.028 197.828 2
 0 3 -15 0.5806 365.574 5
 0 -3 -13 -137.196 180.006 5
 0 -3 -13 -39.6092 187.902 2
 0 3 -13 83.8225 147.017 3
 0 3 -13 -42.306 221.061 5
 0 3 -11 152.215 210.536 5
 0 3 -11 -71.2042 118.518 3
 0 -3 -11 -12.0309 122.148 2
 0 -3 -11 -341.58 330.954 5
 0 3 -9 58.1225 139.041 3
 0 3 -9 -120.947 138.924 5
 0 -3 -9 98.009 69.9235 1
 0 -3 -9 109.834 211.563 2
 0 -3 -9 -83.7358 154.73 5
 0 3 -9 39.5501 94.2529 4
 0 3 -7 5.97362 119.656 3
 0 3 -7 123.159 140.911 4
 0 -3 -7 -72.3336 75.5823 1
 0 -3 -7 35.4174 118.811 2
 0 -3 -7 84.3635 102.275 5
 0 -3 -5 144.377 130.16 5
 0 3 -5 272.549 212.827 5
 0 -3 -5 207.568 114.074 1
 0 -3 -5 512.333 191.704 2
 0 3 -5 545.369 206.623 3
 0 3 -5 126.257 108.989 4
 0 3 -3 94.9738 116.107 6
 0 3 -3 56.2289 103.167 1
 0 3 -3 28.7426 67.4126 4
 0 3 -3 146.457 143.573 3
 0 -3 -3 205.253 106.761 1
 0 -3 -3 158.181 119.282 2
 0 -3 -3 66.79 69.8971 5
 0 3 -3 89.2637 130.931 5
 0 3 -1 1073.87 302.275 6
 0 3 -1 503 106.743 5
 0 3 1 610.044 170.725 1
 0 -3 1 546.062 142.827 1
 0 -3 3 27.3594 53.2307 1
 0 -3 3 47.1809 31.6896 4
 0 -3 3 38.499 76.3863 6
 0 3 3 65.075 63.9934 5
 0 3 3 336.704 165.016 1
 0 3 3 237.959 125.702 2
 0 3 3 82.8931 82.4434 7
 0 -3 3 39.9833 49.2179 5
 0 3 5 112.352 54.5617 8
 0 -3 5 431.944 173.693 6
 0 3 5 444.191 195.988 7
 0 3 5 -75.9181 98.3918 2
 0 -3 5 28.2317 50.7461 4
 0 -3 5 135.805 129.574 3
 0 3 5 108.864 68.2234 1
 0 3 5 189.724 134.678 5
 0 -3 5 228.509 168.648 5
 0 -3 5 121.96 80.7325 1
 0 3 7 -23.5766 56.543 3
 0 3 7 -202.516 203.757 4
 0 -3 7 36.4522 45.0176 1
 0 3 7 46.1035 110.259 5
 0 3 7 -12.1686 113.188 1
 0 -3 7 107.348 133.836 3
 0 -3 7 89.4566 100.81 4
 0 3 7 203.666 98.2818 8
 0 3 7 104.639 109.73 2
 0 -3 7 24.4303 61.883 7
 0 3 9 125.12 112.399 3
 0 -3 9 103.879 56.9178 1
 0 3 9 -63.9623 93.9919 8
 0 3 9 36.9762 104.426 1
 0 -3 9 -8.31283 96.4011 3
 0 -3 9 232.791 167.316 4
 0 3 9 139.173 204.899 4
 0 -3 9 -126.215 123.217 7
 0 3 11 -88.452 129.839 4
 0 -3 11 -12.3406 121.567 4
 0 3 11 -33.6677 136.803 8
 0 3 11 6.7359 103.154 1
 0 -3 13 146.728 208.104 4
 0 3 13 112.14 110.738 1
 0 3 13 -95.151 68.8704 8
 0 3 13 14.5038 126.984 4
 0 3 15 19.9212 63.2998 1
 0 3 15 111.499 237.513 4
 0 -3 15 58.1191 96.7008 4
 0 3 17 -79.45 258.645 4
 0 -3 17 -300.296 343.642 4
 0 3 19 -1301.67 561.452 4
 0 -3 19 -9.6105 216.682 4
 0 3 21 309.333 338.606 4
 0 -3 21 0.51783 228.202 4
 0 -3 21 -71.6384 304.09 6
 0 -3 23 109.427 387.273 6
 0 3 23 164.308 412.101 4
 0 3 25 -81.4191 203.869 4
 0 -4 -22 10294.8 1844.99 5
 0 4 -22 11228.4 2022.26 5
 0 4 -20 8881.28 1194.84 3
 0 -4 -20 6878.77 1466.61 5
 0 4 -20 7760.55 1563 5
 0 4 -18 10406.6 1210.51 3
 0 4 -18 9596.5 1582.07 5
 0 -4 -18 9674.5 1523.53 5
 0 -4 -16 4679.62 956.653 5
 0 -4 -16 3285.89 733.122 2
 0 4 -16 3929.09 941.68 5
 0 4 -16 3926.4 729.721 3
 0 -4 -14 14465.3 1489.35 2
 0 4 -14 14631 1276.93 3
 0 -4 -14 12548.4 1481.97 5
 0 4 -14 16867.4 1773.41 5
 0 4 -12 44665.1 2114.88 3
 0 -4 -12 47338.5 2476.21 2
 0 4 -12 44372.6 2644.46 5
 0 -4 -12 46338.5 2529.4 5
 0 4 -10 7682.13 977.558 5
 0 4 -10 8094.59 914.256 4
 0 -4 -10 8639.44 784.931 1
 0 -4 -10 8602.6 966.437 5
 0 -4 -10 8564.63 989.072 2
 0 4 -10 8228.98 859.349 3
 0 4 -8 26951.6 1430.29 4
 0 -4 -8 28787.1 1627.66 2
 0 4 -8 27694.5 1465.32 3
 0 -4 -8 26051 1320.37 1
 0 4 -8 28693 1721.17 5
 0 -4 -8 27452.4 1532.27 5
 0 4 -6 13180.4 848.372 4
 0 -4 -6 14030.4 920.561 5
 0 4 -6 13479.9 983.168 3
 0 -4 -6 13446.5 896.395 1
 0 4 -6 12217 990.07 5
 0 -4 -6 14553.5 1064.59 2
 0 4 -4 168383 3257.05 6
 0 -4 -4 178684 3537.55 2
 0 -4 -4 174412 3073.29 1
 0 4 -4 171054 3470.08 3
 0 4 -4 174833 2551.73 4
 0 4 -4 178834 3131.82 5
 0 4 -4 178582 2857.23 1
 0 -4 -4 173325 2560.96 5
 0 4 -2 5940.96 645.597 6
 0 4 -2 6263.4 449.925 5
 0 4 -2 6367.56 533.665 1
 0 -4 -2 6237.77 551.757 1
 0 -4 -2 5893.42 708.366 2
 0 -4 -2 6647.82 332.666 5
 0 4 0 12438.3 1569.53 6
 0 4 0 11456.6 723.981 1
 0 -4 0 15300.9 1862.4 6
 0 4 0 11459.7 464.813 7
 0 -4 0 11698.3 723.423 1
 0 4 2 6297.51 557.653 1
 0 -4 2 6517.27 672.399 6
 0 -4 2 6363.56 447.183 5
 0 4 2 5707.09 494.427 7
 0 -4 2 6224.27 509.749 1
 0 4 2 7023.61 767.468 2
 0 -4 4 174137 2568.16 1
 0 -4 4 174985 2432.15 4
 0 4 4 185752 3443.61 2
 0 4 4 181922 3462.62 7
 0 -4 4 188762 3295.32 6
 0 4 4 176395 2593.64 5
 0 4 4 176432 3072.13 1
 0 -4 4 170758 3013.62 5
 0 -4 6 13540.3 947.906 6
 0 -4 6 13254.5 677.236 1
 0 -4 6 13565.2 753.86 4
 0 4 6 12099 395.11 8
 0 4 6 13874.2 1009.43 2
 0 4 6 12634.7 872.726 1
 0 -4 6 12796.9 791.323 7
 0 -4 6 13838.9 994.26 3
 0 4 6 12123.1 850.566 5
 0 4 6 13219.6 1082.86 7
 0 -4 6 12849.6 985.424 5
 0 -4 8 26256 1455.09 3
 0 -4 8 27308.7 1229.11 4
 0 4 8 24886.4 1224.54 3
 0 -4 8 25341.1 1443.79 6
 0 4 8 26377.6 1321.09 1
 0 4 8 26127.8 1470.24 5
 0 -4 8 25918.7 1367.11 7
 0 4 8 25970.6 825.572 8
 0 -4 8 24704.9 879.396 1
 0 4 10 6879.9 529.479 8
 0 -4 10 7103.22 722.251 4
 0 4 10 7113.39 728.517 1
 0 4 10 7127.95 1015.69 4
 0 -4 10 6632.44 399.445 1
 0 -4 10 8015.45 870.489 6
 0 4 12 42769.5 1845.71 1
 0 -4 12 48539.9 2065.76 4
 0 4 12 45717.9 1560.13 8
 0 4 12 42950 2689.91 4
 0 4 14 15133.1 1709.85 4
 0 -4 14 17534.6 1354.32 4
 0 4 14 14530.2 1107.95 1
 0 4 14 14274.3 966.854 8
 0 4 16 3628.14 847.385 4
 0 4 16 2484.07 462.883 1
 0 -4 16 4174.75 733.145 4
 0 -4 16 4753.53 838.612 6
 0 4 18 9790.54 1524.51 4
 0 -4 18 9903.02 1332.32 6
 0 -4 18 10463 1246.33 4
 0 -4 20 7914.26 1157.74 4
 0 4 20 8388.28 1473.63 4
 0 -4 20 7321.56 1253.27 6
 0 4 22 8944.88 1579.15 4
 0 -4 22 10107.1 1542.39 6
 0 4 24 922.282 667.965 4
 0 -5 -23 -423.569 672.208 5
 0 -5 -21 219.856 543.146 5
 0 5 -21 179.989 685.416 5
 0 5 -19 182.283 200.485 3
 0 -5 -19 -104.406 361.902 5
 0 5 -19 319.795 454.72 5
 0 5 -17 104.022 271.156 3
 0 -5 -17 -149.428 363.93 5
 0 5 -17 294.137 375.191 5
 0 -5 -17 -109.817 256.091 2
 0 5 -15 86.0746 146.593 3
 0 -5 -15 -99.6435 152.451 5
 0 -5 -15 -244.757 276.632 2
 0 5 -15 -361.436 490.084 5
 0 5 -13 -43.7927 258.328 5
 0 5 -13 184.435 186.062 3
 0 -5 -13 56.9745 183.692 5
 0 -5 -13 598.899 372.69 2
 0 -5 -11 -5.11297 62.155 1
 0 -5 -11 -11.438 293.384 2
 0 5 -11 501.902 557.058 5
 0 5 -11 83.978 160.156 3
 0 -5 -11 109.515 230.203 5
 0 5 -9 76.8912 98.693 4
 0 -5 -9 14.8981 99.4794 5
 0 -5 -9 22.5149 136.531 2
 0 5 -9 172.538 326.953 5
 0 -5 -9 60.815 150.594 1
 0 5 -9 118.132 141.441 3
 0 -5 -7 66.1333 103.129 5
 0 5 -7 97.5739 153.815 3
 0 5 -7 142.493 182.367 4
 0 5 -7 180.736 159.319 5
 0 -5 -7 -1.91567 95.7111 2
 0 -5 -7 115.353 65.7667 1
 0 5 -5 62.66 98.5492 1
 0 5 -5 80.944 191.827 5
 0 5 -5 -1.26534 192.404 3
 0 5 -5 -4.13942 143.33 6
 0 -5 -5 145.421 115.759 5
 0 -5 -5 109.308 93.9002 1
 0 -5 -5 313.45 224.706 2
 0 5 -5 136.345 148.676 4
 0 5 -3 117.684 97.8128 4
 0 -5 -3 84.0337 44.4332 5
 0 5 -3 175.545 134.248 1
 0 -5 -3 201.495 167.252 1
 0 5 -3 184.929 179.43 6
 0 -5 -3 212.554 185.869 2
 0 5 -3 281.457 157.861 5
 0 5 -1 886.183 429.365 6
 0 -5 -1 214.983 135.461 1
 0 5 -1 545.048 215.575 1
 0 5 -1 325.499 112.39 5
 0 -5 -1 389.233 346.725 2
 0 -5 1 196.448 97.3673 5
 0 5 1 368.115 213.371 1
 0 -5 1 124.931 130.194 1
 0 5 1 943.921 622.774 6
 0 -5 1 364.25 373.591 6
 0 5 1 358.471 128.013 7
 0 -5 3 583.657 251.274 6
 0 -5 3 141.108 127.557 5
 0 5 3 95.1655 75.0652 7
 0 5 3 730.15 303.764 2
 0 5 3 200.502 199.825 1
 0 -5 3 86.5498 119.321 1
 0 5 5 273.987 164.106 2
 0 -5 5 195.483 191.579 6
 0 5 5 -3.18644 98.2937 7
 0 5 5 47.0973 52.2793 5
 0 -5 5 266.388 148.489 4
 0 -5 5 42.5955 137.257 5
 0 -5 5 300.776 127.53 1
 0 5 5 130.433 85.1575 1
 0 -5 7 95.3598 93.4482 6
 0 -5 7 152.069 125.756 4
 0 -5 7 213.116 110.312 1
 0 5 7 119.745 180.554 1
 0 5 7 141.38 166.461 5
 0 -5 7 -30.3582 150.811 3
 0 -5 7 110.203 76.5481 7
 0 5 9 -52.4934 92.6988 3
 0 5 9 -78.7191 137.127 1
 0 -5 9 76.7543 60.5963 7
 0 -5 9 225.161 137.347 4
 0 -5 9 64.8861 82.4298 1
 0 5 9 77.7105 71.2306 8
 0 5 11 8.95265 155.644 1
 0 -5 11 139.124 84.4239 1
 0 -5 11 25.4899 105.057 4
 0 -5 11 97.0176 270.108 6
 0 5 11 13.9916 40.938 8
 0 5 11 49.2601 222.298 4
 0 -5 13 143.044 248.157 6
 0 5 13 126.144 100.632 8
 0 -5 13 50.8327 86.9115 4
 0 5 13 73.7139 130.866 1
 0 5 13 191.94 196.903 4
 0 -5 15 -255.597 307.079 6
 0 5 15 -372.75 472.019 4
 0 5 15 -86.707 131.61 1
 0 -5 15 -1073.33 351.429 4
 0 -5 17 -20.1073 209.385 4
 0 -5 17 -7.50315 254.663 6
 0 5 19 641.933 598.679 4
 0 -5 19 42.5833 217.07 6
 0 -5 19 240.958 325.576 4
 0 5 21 -281.428 543.831 4
 0 -5 21 555.83 531.924 6
 0 5 23 -17.4747 361.239 4
 0 -5 23 -382.015 326.693 6
 0 -6 -24 -244.517 522.503 5
 0 -6 -22 4054.69 1160.05 5
 0 6 -22 4169.56 1257.78 5
 0 -6 -20 32225.6 2979.58 5
 0 6 -20 34559.5 3298.87 5
 0 6 -20 30691.5 2352.13 3
 0 6 -18 27392.3 2146.18 3
 0 6 -18 28587.2 2781.57 5
 0 -6 -18 26890.5 2552.35 5
 0 -6 -18 28762.3 2543.75 2
 0 -6 -16 7071.06 1216.48 5
 0 6 -16 7593.76 1351.96 5
 0 -6 -16 7026.45 1187.3 2
 0 6 -16 5962.7 955.474 3
 0 6 -14 398.306 216.202 5
 0 6 -14 794.094 349.68 3
 0 -6 -14 913.007 457.648 2
 0 -6 -14 480.025 306.321 5
 0 6 -12 21241.3 1652.85 3
 0 -6 -12 22082.9 1819.46 2
 0 -6 -12 22444.5 1740.86 5
 0 6 -12 21594.5 1870.77 5
 0 6 -10 63116.8 2678.9 3
 0 -6 -10 63157 2597.36 5
 0 6 -10 63542.8 2537.32 4
 0 -6 -10 61753.3 2884.63 2
 0 6 -10 64101.5 2965.84 5
 0 -6 -8 42966.5 2239.76 2
 0 6 -8 43704.2 1830.83 4
 0 6 -8 43441.8 2164.85 5
 0 6 -8 42636.6 2153.79 3
 0 -6 -8 42569.2 1856.73 5
 0 6 -6 7526.86 909.492 3
 0 -6 -6 8293.17 691.842 5
 0 -6 -6 8043.73 809.537 1
 0 6 -6 7100.42 701.275 1
 0 6 -6 7628.27 670.612 4
 0 6 -6 8154.53 834.656 5
 0 -6 -6 7703.45 933.889 2
 0 6 -4 33802.9 1428.83 4
 0 -6 -4 29453.2 790.334 8
 0 6 -4 32710.4 1895.54 3
 0 -6 -4 31524.9 1550.88 1
 0 -6 -4 32546.5 1925.69 2
 0 -6 -4 31645.4 1045.15 5
 0 6 -4 31048.1 1482.24 1
 0 6 -4 35647.1 1855.8 6
 0 6 -4 34729.3 1448.59 5
 0 6 -2 246660 4098.69 1
 0 6 -2 241917 3086.78 5
 0 6 -2 243411 5662.91 6
 0 -6 -2 231259 6115.08 2
 0 -6 -2 251798 4246.72 1
 0 -6 0 94473.5 1292.8 5
 0 6 0 104493 2707.79 1
 0 -6 0 100994 2604.34 1
 0 6 0 106150 5399.27 6
 0 6 0 101466 1730.35 7
 0 6 2 255323 6252.48 2
 0 -6 2 245991 3002.11 5
 0 -6 2 253364 4006.28 1
 0 6 2 256083 4307.61 1
 0 6 2 260683 3705.84 7
 0 -6 2 251302 5839.77 6
 0 -6 4 30817.3 1706.21 6
 0 6 4 31632.1 1796.23 2
 0 -6 4 31294.2 745.178 7
 0 6 4 32149.2 1576.59 1
 0 -6 4 28976.5 1314.05 1
 0 6 4 32023.3 1558.6 7
 0 -6 4 29977.6 1323.18 5
 0 6 6 10894.8 788.704 5
 0 -6 6 9743.96 927.179 6
 0 -6 6 8894 703.533 1
 0 -6 6 9746.73 888.816 5
 0 6 6 10103 912.599 1
 0 -6 6 10380.9 645.259 7
 0 -6 6 10881.2 752.1 4
 0 6 8 43056.2 1846.67 5
 0 -6 8 42552.7 1636.33 7
 0 -6 8 40223.7 1428.13 1
 0 -6 8 45094.6 1602.07 4
 0 6 8 42271.7 1949.45 1
 0 -6 8 45629.6 2093.74 6
 0 -6 10 58944.9 2241.06 7
 0 -6 10 62854.4 2104.25 4
 0 6 10 62575.2 3294.96 4
 0 6 10 60491.6 1052.46 8
 0 6 10 60338.8 2424.18 1
 0 -6 10 57668.2 1577.61 1
 0 -6 10 62498 2635.67 6
 0 -6 12 21409.9 1659.9 6
 0 6 12 20886 774.431 8
 0 6 12 20397.4 1475.05 1
 0 -6 12 20746.2 1320.66 4
 0 -6 12 18496.6 757.1 1
 0 6 12 20147.8 1975.59 4
 0 -6 14 506.457 273.349 4
 0 6 14 572.79 354.921 4
 0 -6 14 237.902 131.476 6
 0 6 14 599.926 305.097 1
 0 -6 16 5699.49 1021.68 6
 0 -6 16 6332.33 870.79 4
 0 6 16 4114.65 698.21 1
 0 6 16 7112.31 1300.9 4
 0 -6 18 24578.8 2167.12 6
 0 6 18 24192.9 2570.44 4
 0 -6 18 20351.5 1675.56 4
 0 -6 20 33004.7 2686.29 6
 0 -6 20 33948.4 2295.96 4
 0 6 20 32417.3 3079.94 4
 0 6 22 4096.38 1172.59 4
 0 -6 22 4656.9 1088.78 6
 0 6 24 -1619.8 767.466 4
 0 -7 -23 -26.6626 506.576 5
 0 -7 -21 6.19545 308.657 5
 0 7 -21 101.976 193.01 3
 0 7 -21 -258.143 508.991 5
 0 7 -19 58.6548 137.716 3
 0 -7 -19 153.487 326.054 5
 0 7 -19 174.809 485.496 5
 0 -7 -19 616.608 491.144 2
 0 7 -17 490.512 386.729 5
 0 -7 -17 581.338 578.184 5
 0 7 -17 90.5041 182.075 3
 0 -7 -15 619.904 359.831 2
 0 7 -15 219.605 166.391 5
 0 7 -15 -120.325 181.993 3
 0 -7 -15 239.05 402.021 5
 0 7 -13 81.1374 238.288 3
 0 7 -13 -40.1834 361.079 5
 0 -7 -13 698.886 485.525 5
 0 -7 -13 317.023 385.247 2
 0 7 -11 145.618 114.231 3
 0 -7 -11 -55.5545 145.474 2
 0 7 -11 -68.7948 217.687 5
 0 -7 -11 271.121 233.015 5
 0 -7 -9 24.0884 77.9719 5
 0 7 -9 23.3273 80.7913 4
 0 -7 -9 1.58295 160.713 2
 0 7 -9 -115.111 210.386 5
 0 7 -7 -21.8504 75.2821 4
 0 7 -7 309.649 288.023 3
 0 7 -7 285.807 194.539 5
 0 -7 -7 290.849 275.284 5
 0 7 -5 -17.1399 95.0772 5
 0 -7 -5 139.371 136.374 5
 0 7 -5 256.979 187.897 1
 0 -7 -5 28.7839 211.33 2
 0 7 -5 132.045 125.113 3
 0 7 -5 -13.2073 78.1686 4
 0 -7 -3 -26.6833 140.852 1
 0 7 -3 137.446 218.789 6
 0 -7 -3 49.698 72.4796 5
 0 7 -3 58.217 132.255 1
 0 -7 -3 67.5325 299.339 2
 0 7 -3 37.3934 55.0511 5
 0 7 -1 -43.2402 170.311 6
 0 7 -1 83.2772 65.9985 7
 0 -7 -1 83.5349 122.25 1
 0 7 -1 121.316 187.99 1
 0 -7 -1 227.782 253.605 2
 0 7 -1 130.59 70.0467 5
 0 7 1 142.151 124.514 7
 0 7 1 218.366 178.836 1
 0 -7 1 34.0539 121.299 1
 0 7 3 1136.41 481.98 2
 0 -7 3 42.2219 73.7788 5
 0 7 3 45.3237 142.816 7
 0 -7 3 14.7759 102.83 1
 0 7 3 860.232 578.938 1
 0 -7 3 430.159 304.261 6
 0 -7 5 90.1303 60.9486 7
 0 -7 5 94.2034 95.8813 5
 0 7 5 224.124 379.864 1
 0 -7 5 394.201 357.602 6
 0 7 5 227.23 169.614 7
 0 -7 5 141.682 71.2282 1
 0 -7 7 82.6335 196.335 6
 0 -7 7 83.5949 57.0455 7
 0 -7 7 19.7694 122.157 1
 0 -7 9 -83.4154 217.249 6
 0 -7 9 -50.3154 107.903 7
 0 -7 9 53.8473 77.4426 1
 0 -7 9 -23.7151 105.259 4
 0 -7 11 60.5522 145.221 4
 0 7 11 400.326 327.9 4
 0 -7 11 -16.6783 179.776 6
 0 7 11 486.985 298.352 1
 0 -7 11 79.3081 66.3738 1
 0 -7 13 21.9516 45.0884 1
 0 7 13 0.63447 231.938 4
 0 -7 13 -55.7884 106.013 4
 0 -7 13 276.282 330.604 6
 0 7 13 54.297 25.2945 8
 0 7 15 718.478 436.355 1
 0 -7 15 13.1636 252.247 6
 0 -7 15 -219.936 225.181 4
 0 7 15 36.6944 299.586 4
 0 -7 17 240.469 267.137 4
 0 7 17 305.258 202.864 4
 0 7 17 932.721 461.955 1
 0 -7 17 193.832 309.53 6
 0 -7 19 -417.933 347.353 6
 0 -7 19 112.417 141.223 4
 0 7 19 -328.061 511.131 4
 0 7 21 893.341 754.833 4
 0 -7 21 17.2918 208.771 6
 0 7 23 -1233.23 689.061 4
 0 -8 -24 2887.22 1046.94 5
 0 -8 -22 961.505 660.986 5
 0 8 -22 2176.56 988.846 5
 0 -8 -20 2090.72 718.516 5
 0 8 -20 2782.38 935.583 5
 0 -8 -20 4051.85 1090.98 2
 0 8 -20 2210.58 615.541 3
 0 8 -18 10957 1729.39 5
 0 8 -18 9222.09 1307.22 3
 0 -8 -18 7115.05 1307.68 5
 0 -8 -18 7967.65 1404.69 2
 0 -8 -16 1534.53 512.76 5
 0 -8 -16 1488.53 671.943 2
 0 8 -16 2245.32 657.026 3
 0 8 -14 4422.75 967.819 5
 0 8 -14 3207.31 728.581 3
 0 -8 -14 3293.17 858.75 2
 0 -8 -14 2974.84 730.433 5
 0 8 -12 1670.74 551.946 3
 0 8 -12 1979.62 663.013 5
 0 -8 -12 1231.31 418.666 5
 0 -8 -12 1428.51 488.71 2
 0 -8 -10 18057.6 1724.67 2
 0 8 -10 20112.5 1448.16 4
 0 8 -10 18812.2 1660.75 3
 0 -8 -10 20826.6 1452.78 5
 0 -8 -8 3639.07 520.871 5
 0 8 -8 3499.94 561.295 4
 0 8 -8 4759.37 833.038 3
 0 -8 -8 4129.37 808.163 2
 0 8 -8 6005.74 842.375 5
 0 -8 -6 30041.5 2189.29 2
 0 -8 -6 29958.3 1265.73 5
 0 8 -6 35481.6 2259.7 3
 0 8 -6 30119.9 1562.42 4
 0 8 -6 32967.7 1998.62 1
 0 -8 -4 27657.6 2179.66 2
 0 -8 -4 31923.2 998.087 5
 0 8 -4 34539.8 1832.61 1
 0 8 -4 31689.3 1849.44 4
 0 8 -4 35163.5 1540.04 5
 0 8 -2 41467.6 2005.35 1
 0 8 -2 41516.9 1420.61 5
 0 8 0 1042.89 218.702 7
 0 -8 0 782.727 275 1
 0 -8 0 662.897 123.828 5
 0 8 0 725.083 259.304 1
 0 -8 0 1639.54 1061.09 6
 0 8 0 276.013 604.587 6
 0 -8 2 39860.7 1845.69 1
 0 8 2 44090.4 2069.54 1
 0 8 2 42652.9 1667.57 7
 0 -8 2 44678.6 3062.88 6
 0 -8 2 39021.4 1281.41 5
 0 -8 4 37222.4 1745.57 1
 0 -8 4 35623.6 1510.24 5
 0 8 4 39534.3 2016.11 1
 0 8 4 35467.9 1782.93 7
 0 -8 4 35973.8 2302.47 6
 0 8 6 29223.1 1787.75 1
 0 -8 6 34622.2 1687.37 1
 0 -8 8 3716.06 562.614 1
 0 -8 8 4544.05 503.806 7
 0 -8 8 4431.57 840.827 6
 0 8 8 3694.73 632.088 1
 0 -8 10 23014.8 1222.95 1
 0 -8 10 24446.1 1384.18 4
 0 -8 10 25236.5 1823.15 6
 0 8 10 21665.1 1631 1
 0 -8 10 22524.3 1316.33 7
 0 -8 12 2040.46 339.571 1
 0 -8 12 1526.27 448.959 6
 0 8 12 1047.51 442.84 4
 0 8 12 1257.95 458.111 1
 0 -8 12 1471.39 379.017 4
 0 8 14 2670.08 591.209 1
 0 8 14 2740.05 860.879 4
 0 -8 14 3576.87 781.698 6
 0 -8 14 3354.62 578.438 4
 0 8 16 1110.77 383.809 1
 0 -8 16 1910.83 507.97 4
 0 8 16 706.823 515.525 4
 0 -8 18 8630.03 1331.32 6
 0 -8 18 5337.09 845.298 4
 0 8 18 8239 1600.92 4
 0 8 20 2231.18 836.17 4
 0 -8 20 2494.99 713.661 6
 0 -8 22 632.154 567.614 6
 0 8 22 333.708 469.072 4
 0 -9 -23 304.378 423.53 5
 0 -9 -21 243.767 419.462 5
 0 -9 -21 7.30043 307.397 2
 0 9 -21 121.997 247.249 3
 0 9 -21 -168.197 394.958 5
 0 -9 -19 264.664 305.522 5
 0 9 -19 -76.315 363.013 3
 0 9 -19 -460.229 442.803 5
 0 -9 -19 -172.117 344.16 2
 0 -9 -17 -70.5324 282.267 2
 0 9 -17 173.855 395.71 3
 0 -9 -17 370.676 531.645 5
 0 9 -17 242.187 265.537 5
 0 -9 -15 40.5396 309.673 2
 0 9 -15 285.207 342.878 3
 0 -9 -15 -8.90003 213.487 5
 0 9 -15 528.367 462.719 5
 0 -9 -13 -39.6819 127.983 5
 0 -9 -13 -164.593 326.444 2
 0 9 -13 -82.0275 231.887 5
 0 9 -13 -256.376 285.599 3
 0 9 -11 -45.3009 275.349 3
 0 -9 -11 -92.0165 136.571 2
 0 -9 -11 20.3773 159.973 5
 0 9 -11 170.146 257.932 5
 0 -9 -9 443.649 390.036 2
 0 9 -9 -19.2742 137.277 5
 0 9 -9 -40.2901 186.868 4
 0 9 -9 52.1652 255.163 3
 0 -9 -9 -22.2648 116.724 5
 0 9 -7 180.175 185.09 3
 0 9 -7 104.983 163.794 5
 0 9 -7 -21.4253 154.405 1
 0 -9 -7 36.7753 301.87 2
 0 9 -7 90.0771 120.152 4
 0 -9 -7 -54.2315 112.95 5
 0 9 -5 10.3702 98.1375 4
 0 -9 -5 62.1656 66.1286 5
 0 9 -5 450.134 329.71 3
 0 -9 -5 58.5937 196.293 2
 0 -9 -5 -12.9622 64.8555 8
 0 9 -5 -50.4349 166.045 1
 0 9 -5 133.315 126.975 5
 0 -9 -3 85.897 49.2022 5
 0 9 -3 19.0078 83.4749 5
 0 9 -3 107.77 153.045 1
 0 -9 -3 115.498 322.927 2
 0 -9 -1 -211.478 250.782 2
 0 9 -1 199.262 247.87 1
 0 9 -1 204.127 102.747 7
 0 -9 1 405.587 444.838 6
 0 9 1 22.6194 111.078 7
 0 9 1 435.153 269.714 1
 0 -9 1 97.5322 86.23 5
 0 -9 3 93.9808 94.1974 5
 0 9 3 174.673 146.774 7
 0 9 3 231.743 231.323 1
 0 -9 3 -95.5639 312.371 6
 0 -9 5 65.7958 101.97 1
 0 -9 5 72.0058 103.193 5
 0 9 5 89.3556 213.163 1
 0 -9 5 -90.5872 193.289 6
 0 -9 7 307.909 182.339 1
 0 9 7 43.9808 114.262 1
 0 -9 7 119.739 80.907 7
 0 -9 7 155.687 228.636 6
 0 -9 9 53.3104 51.3599 7
 0 9 9 -242.238 282.16 1
 0 -9 9 23.0881 88.8863 1
 0 -9 9 -51.3054 226.142 6
 0 -9 11 51.9983 146.859 4
 0 9 11 41.6993 149.643 1
 0 -9 11 -76.8629 132.497 6
 0 -9 11 -74.0518 95.7475 7
 0 -9 11 154.06 110.929 1
 0 9 13 60.0968 231.76 1
 0 -9 13 -16.0208 171.178 6
 0 -9 13 28.1144 199.253 4
 0 9 15 96.9005 240.288 4
 0 9 15 171.611 190.604 1
 0 -9 15 -557.596 377.569 6
 0 -9 15 -95.9622 196.741 4
 0 -9 17 14.0438 287.043 6
 0 -9 17 -54.5372 139.994 4
 0 9 17 123.597 353.424 4
 0 9 17 -39.3657 107.906 1
 0 -9 19 -215.175 295.649 6
 0 9 19 147.868 239.036 4
 0 -9 21 289.207 288.821 6
 0 9 21 77.5271 365.871 4
 0 -10 -22 -199.329 394.012 5
 0 -10 -20 11446.5 1780.54 5
 0 10 -20 13370.4 2111.46 5
 0 -10 -20 12049.8 1982.09 2
 0 10 -20 9687.92 1540.24 3
 0 -10 -18 6614.77 1266.83 5
 0 -10 -18 3530.18 1017.85 2
 0 10 -18 5405.95 1210.38 5
 0 10 -18 6073.58 1197.9 3
 0 10 -16 11780.4 1587.29 3
 0 -10 -16 14349.5 1668.41 5
 0 10 -16 13625 1804.3 5
 0 -10 -16 14085.5 1925.66 2
 0 10 -14 12319 1618.24 3
 0 -10 -14 15323.1 1928.15 2
 0 10 -14 16611.1 1871.1 5
 0 -10 -14 16772.2 1634.69 5
 0 10 -12 26519.8 2280.33 3
 0 10 -12 30706.7 2329.08 5
 0 -10 -12 25599.3 2379.56 2
 0 -10 -12 26691.1 1873.38 5
 0 10 -10 29130.1 2055.92 5
 0 10 -10 23735.6 2123.86 3
 0 -10 -10 29502 1727.48 5
 0 -10 -10 25928.2 2325.36 2
 0 10 -8 8259.55 1252.11 3
 0 -10 -8 9877.13 1456.5 2
 0 10 -8 7466.37 890.418 4
 0 10 -8 8651.11 1013.73 5
 0 10 -8 9381.37 1094 1
 0 -10 -8 9557.47 861.59 5
 0 -10 -6 29048 1193.09 5
 0 10 -6 30730 1977.98 1
 0 10 -6 29924.1 2364.58 3
 0 -10 -6 27270.6 2406.09 2
 0 10 -6 33209.5 1775.92 5
 0 -10 -6 26996 984.119 8
 0 10 -6 27578.6 1770.77 4
 0 -10 -4 100397 4973.66 2
 0 10 -4 108659 2873.66 5
 0 10 -4 111028 3716.05 1
 0 -10 -4 107343 1652.37 5
 0 10 -2 116175 2705.47 5
 0 10 -2 118774 3825.55 1
 0 -10 0 37074.8 4093.5 6
 0 10 0 36069.2 1375.43 7
 0 -10 0 30562.3 868.66 5
 0 10 0 36558.9 2112.33 1
 0 10 2 117849 3008.3 7
 0 10 2 126686 3970.38 1
 0 -10 2 116319 2314.36 5
 0 10 4 119311 3936.42 1
 0 10 4 118852 3467.99 7
 0 -10 4 111054 2771.1 5
 0 -10 4 114028 4823.34 6
 0 -10 6 29276.1 2236.88 6
 0 10 6 29904.1 2003.19 1
 0 -10 8 8506.52 564.857 7
 0 10 8 10641.5 1287.13 1
 0 -10 8 10141.1 1300.21 6
 0 -10 10 31464.7 2260.69 6
 0 -10 10 28407 1307.73 7
 0 10 10 32113.6 2199.6 1
 0 -10 10 25969.8 1507.36 1
 0 -10 12 27548.1 2166.33 6
 0 10 12 27201.6 2107.11 1
 0 -10 14 14068.8 1217.42 4
 0 -10 14 15568 1703.89 6
 0 10 14 16061.1 1661.08 1
 0 10 14 16287.2 2114.42 4
 0 10 16 12693.8 2007.49 4
 0 -10 16 8804.89 1021.82 4
 0 10 16 11702.1 1468.21 1
 0 -10 16 11795.9 1554.91 6
 0 10 18 4850.3 1287.76 4
 0 -10 18 4622.02 1033.92 6
 0 10 20 8718.31 1836.68 4
 0 -10 20 10587.7 1634.5 6
 0 10 22 80.6837 334.192 4
 0 -11 -21 269.784 486.639 5
 0 11 -21 268.119 683.189 5
 0 -11 -21 964.368 747.028 2
 0 11 -21 -182.751 229.986 3
 0 -11 -19 -60.4707 407.526 5
 0 11 -19 944.846 629.985 3
 0 -11 -19 150.984 409.379 2
 0 11 -19 87.0518 268.778 5
 0 11 -17 128.33 289.465 3
 0 -11 -17 -178.567 516.895 5
 0 -11 -17 143.998 377.277 2
 0 11 -17 75.9253 347.57 5
 0 11 -15 -79.552 268.006 3
 0 -11 -15 -226.483 328.833 2
 0 11 -15 207.911 340.786 5
 0 -11 -15 -214.291 351.035 5
 0 -11 -13 363.537 321.97 5
 0 11 -13 -413.359 434.956 5
 0 -11 -13 -305.765 452.038 2
 0 11 -13 -743.648 518.815 3
 0 11 -11 -402.152 441.242 3
 0 -11 -11 -94.0142 128.822 5
 0 -11 -11 -192.552 460.807 2
 0 11 -11 -32.4749 142.949 5
 0 -11 -9 -190.554 172.855 5
 0 -11 -9 435.946 403.051 2
 0 11 -9 439.668 298.67 3
 0 11 -9 278.745 285.272 5
 0 -11 -7 41.1268 142.718 2
 0 11 -7 6.24573 113.01 1
 0 11 -7 377.08 322.987 4
 0 11 -7 294.68 204.289 3
 0 11 -7 39.7348 265.564 5
 0 -11 -7 16.951 66.9776 5
 0 11 -5 12.5998 148.147 1
 0 11 -5 24.1826 113.188 5
 0 -11 -5 92.4465 64.9712 5
 0 11 -5 -30.8408 230.921 4
 0 11 -5 419.556 416.503 3
 0 -11 -5 -32.4342 392.21 2
 0 11 -3 170.265 216.981 1
 0 11 -3 -166.144 135.421 5
 0 -11 -1 -156.663 389.083 2
 0 11 -1 148.575 194.188 1
 0 11 -1 75.0307 57.6022 7
 0 -11 1 50.1369 62.2129 5
 0 11 1 54.8978 90.68 7
 0 -11 1 -122.462 566.464 6
 0 11 1 199.943 344.153 1
 0 -11 3 31.4646 227.565 6
 0 11 3 397.962 305.496 1
 0 -11 3 17.89 64.5989 5
 0 11 3 -106.955 122.148 7
 0 -11 5 -79.2039 217.919 6
 0 -11 5 27.8712 148.701 5
 0 11 7 429.192 325.858 1
 0 -11 7 -313.204 269.397 6
 0 11 9 541.533 383.415 1
 0 -11 9 67.6439 29.7471 7
 0 -11 9 308.32 313.819 6
 0 -11 11 147.95 174.041 6
 0 11 11 30.7942 263.194 1
 0 -11 13 -102.439 191.009 6
 0 11 13 -32.7206 210.964 1
 0 11 13 390.429 385.752 4
 0 11 15 -643.175 603.252 4
 0 11 15 273.771 261.717 1
 0 -11 15 -115.698 312.832 6
 0 11 17 -110.326 279.649 1
 0 11 17 -322.805 505.086 4
 0 -11 17 363.637 317.985 6
 0 11 19 85.4068 418.898 4
 0 -11 19 41.1431 312.761 6
 0 -11 21 481.329 477.896 6
 0 11 21 1280.2 961.143 4
 0 -12 -20 57150.8 4562.74 2
 0 12 -20 63215 4667.39 5
 0 12 -20 60741.8 4158.24 3
 0 12 -18 16043.7 2207.85 5
 0 -12 -18 14497.3 2247.8 2
 0 -12 -18 15900.4 1888.46 5
 0 12 -18 14063.1 1973.19 3
 0 12 -16 2400.21 728.487 5
 0 12 -16 3406.01 940.257 3
 0 -12 -16 2792.25 722.054 5
 0 -12 -16 3227.71 1078.14 2
 0 -12 -14 1073.04 400.853 5
 0 -12 -14 796.064 281.847 2
 0 12 -14 1524.53 556.792 5
 0 12 -14 1056.48 498.76 3
 0 -12 -12 5809.84 1189.13 2
 0 12 -12 4426.31 975.528 3
 0 12 -12 5587.65 1012.58 5
 0 -12 -12 5855.71 864.762 5
 0 12 -10 42558.3 2556.09 5
 0 -12 -10 39515.2 1942.13 5
 0 -12 -10 32472.6 2924.06 2
 0 12 -10 34581.5 2808.09 3
 0 12 -8 11321.5 1213.09 5
 0 -12 -8 9623.54 804.411 5
 0 12 -8 10058.6 1265.34 1
 0 -12 -8 9639.1 1567.75 2
 0 12 -8 11743.3 1626.11 3
 0 -12 -6 639.255 190.003 8
 0 -12 -6 691.734 163.529 5
 0 -12 -6 407.788 266.911 2
 0 12 -6 1620.39 568.304 3
 0 12 -6 979.32 323.71 5
 0 12 -6 1235.02 443.334 1
 0 12 -4 156804 4921.66 1
 0 12 -4 147943 3610.14 5
 0 12 -2 67072.2 3171.35 1
 0 -12 -2 89629.4 5421.58 2
 0 -12 0 9357.74 2136.42 6
 0 12 0 10445.1 1248.04 1
 0 -12 0 7754.15 440.265 5
 0 12 0 8208.78 744.99 7
 0 -12 0 8852.2 1704.17 2
 0 12 2 65539.3 2415.93 7
 0 -12 2 67009 1824.78 5
 0 12 2 65368.8 3214.36 1
 0 -12 4 148903 3313.35 5
 0 12 4 161792 5032.79 1
 0 -12 4 150858 6422.3 6
 0 -12 6 330.406 231.4 6
 0 12 6 606.64 371.776 1
 0 12 8 10178.2 1331.87 1
 0 -12 8 14008.9 1685.23 6
 0 -12 10 41432.9 2904.85 6
 0 12 10 40908.7 2713.68 1
 0 12 12 6220.55 1055.75 1
 0 -12 12 5137.86 1044.55 6
 0 12 14 1413.58 530.846 1
 0 12 14 495.147 335.339 4
 0 -12 14 1683.69 635.809 6
 0 -12 16 3052.9 860.313 6
 0 12 16 2779.42 943.307 4
 0 12 16 2700.77 757.653 1
 0 12 18 12828.1 2190.1 4
 0 -12 18 18233.9 2169.63 6
 0 -12 20 55613.9 3942.19 6
 0 12 20 57039.3 4756.06 4
 0 13 -21 290.724 296.488 3
 0 13 -19 -73.6453 267.911 3
 0 13 -19 308.614 561.39 5
 0 -13 -19 347.226 603.018 2
 0 13 -17 197.105 411.127 3
 0 13 -17 634.33 573.956 5
 0 -13 -17 360.382 551.018 2
 0 -13 -15 290.809 334.874 2
 0 13 -15 -223.878 413.143 3
 0 13 -15 398.462 321.368 5
 0 -13 -15 -179.749 333.896 5
 0 -13 -13 13.919 256.424 2
 0 13 -13 -414.814 369.988 5
 0 -13 -13 34.5376 263.068 5
 0 13 -13 -356.161 611.101 3
 0 -13 -11 -106.741 203.095 2
 0 13 -11 -77.5495 160.723 5
 0 -13 -11 -116.623 183.482 5
 0 13 -11 52.203 315.003 3
 0 13 -9 -46.3736 358.74 3
 0 -13 -9 12.3963 289.278 2
 0 -13 -9 -165.506 201.681 5
 0 13 -9 -127.177 271.311 5
 0 -13 -7 31.5023 45.8216 5
 0 13 -7 94.1649 182.826 5
 0 -13 -7 -118.47 270.131 2
 0 13 -7 -67.091 159.037 1
 0 -13 -7 13.4533 98.9519 8
 0 13 -5 66.2239 129.276 5
 0 -13 -5 127.136 276.96 2
 0 13 -5 67.0386 316.19 1
 0 -13 -3 -137.688 502.438 2
 0 13 -3 57.3674 261.808 1
 0 13 -1 189.856 198.652 1
 0 13 -1 127.14 164.641 7
 0 -13 -1 523.499 376.68 2
 0 13 1 -24.5657 268.079 1
 0 13 1 53.2057 93.3905 7
 0 -13 1 -17.8236 642.803 6
 0 -13 1 69.2147 54.9925 5
 0 13 3 -60.8449 195.102 7
 0 -13 3 64.7043 68.6618 5
 0 -13 3 -75.8288 228.244 6
 0 13 3 314.449 230.397 1
 0 13 5 -226.048 350.759 1
 0 -13 5 -65.0582 162.789 5
 0 -13 5 -413.273 587.871 6
 0 13 7 -150.376 207.895 1
 0 -13 7 107.395 300.956 6
 0 -13 9 -252.033 324.226 6
 0 13 9 -156.715 266.897 1
 0 13 11 233.023 308.828 1
 0 -13 11 191.458 254.239 6
 0 13 13 110.074 221.813 1
 0 -13 13 113.464 251.21 6
 0 13 15 -705.912 645.771 4
 0 13 15 33.2161 312.371 1
 0 -13 15 492.667 517.279 6
 0 -13 17 50.9488 191.166 6
 0 13 17 90.9042 246.654 1
 0 -13 19 1847.51 844.87 6
 0 13 19 190.852 525.104 4
 0 14 -20 1786.96 823.178 3
 0 14 -20 2190.4 847.925 5
 0 14 -18 2758.91 861.576 3
 0 14 -18 2760.24 987.588 5
 0 -14 -18 2840.1 1177.74 2
 0 14 -16 15619.7 2014.63 5
 0 -14 -16 11277.6 2055.56 2
 0 14 -16 10337.4 1776.75 3
 0 -14 -14 698.731 498.352 2
 0 14 -14 944.023 504.452 5
 0 14 -14 180.464 449.525 3
 0 14 -12 13528.1 1606.41 5
 0 -14 -12 11576.8 1922.26 2
 0 -14 -12 13706.2 1245.89 5
 0 14 -12 10853.5 1760.88 3
 0 -14 -10 552.547 501.453 2
 0 14 -10 418.989 221.093 5
 0 -14 -10 428.357 80.2538 5
 0 14 -10 691.866 346.146 3
 0 14 -8 14145.8 1398.45 5
 0 -14 -8 13082.1 854.044 5
 0 14 -8 12037.5 1506.04 1
 0 -14 -8 8694.65 1651.47 2
 0 14 -8 14543.9 1939.28 3
 0 -14 -6 2032.34 222.139 5
 0 14 -6 2051.49 614.827 1
 0 -14 -6 2811.67 486.842 8
 0 14 -6 2706.26 834.531 3
 0 -14 -6 1011.97 669.433 2
 0 14 -6 2235.36 525.852 5
 0 14 -4 37947 2664.43 1
 0 -14 -4 50316.8 4157.56 2
 0 -14 -2 20396.3 2756.93 2
 0 14 -2 14441.6 1625.86 1
 0 -14 0 43337.9 3951.45 2
 0 14 0 35893.1 2544.04 1
 0 14 0 38124.8 1837.04 7
 0 -14 2 12906.6 806.965 5
 0 14 2 15523.8 1683.94 1
 0 -14 2 17292.6 2659.87 6
 0 14 2 14935.4 1240.88 7
 0 -14 4 35034.6 1644.7 5
 0 -14 4 39140.9 3542.09 6
 0 14 4 39642.9 2722.42 1
 0 14 6 1809.41 603.965 1
 0 -14 6 1599.63 626.527 6
 0 -14 8 12332.6 1797.16 6
 0 14 8 12401.4 1575.85 1
 0 -14 10 518.618 304.489 6
 0 14 10 463.958 361.059 1
 0 14 12 13061 1687.24 1
 0 -14 12 14440 1904.12 6
 0 14 14 750.615 342.597 1
 0 14 14 942.886 599.941 4
 0 -14 14 1427.62 622.013 6
 0 -14 16 15409.2 2074.62 6
 0 14 16 13682.6 1832.13 1
 0 14 16 13623.1 2258.1 4
 0 -14 18 3313.09 1024.73 6
 0 14 18 4365.41 1314.91 4
 0 15 -19 -15.3192 190.165 3
 0 15 -19 -240.998 310.97 5
 0 -15 -17 110.586 398.896 2
 0 15 -17 -73.6564 282.554 5
 0 15 -17 159.426 406.323 3
 0 15 -15 -18.2752 284.482 3
 0 -15 -15 526.595 429.146 2
 0 15 -15 523.528 490.508 5
 0 -15 -13 -387.758 543.436 2
 0 15 -13 1.84589 192.429 5
 0 15 -13 23.6261 330.074 3
 0 15 -11 -454.726 475.81 3
 0 -15 -11 6.06246 270.241 2
 0 15 -11 472.547 408.391 5
 0 15 -9 -24.2762 374.952 3
 0 15 -9 526.998 409.243 1
 0 -15 -9 143.318 461.627 2
 0 15 -9 368.384 246.667 5
 0 15 -7 1580.13 851.569 3
 0 15 -7 2003.2 847.909 1
 0 -15 -7 610.495 704.99 2
 0 15 -7 1431.89 667.794 5
 0 15 -5 2016.52 778.747 1
 0 -15 -5 -127.713 417.297 2
 0 -15 -3 58.5595 270.809 2
 0 15 -3 498.102 374.937 1
 0 15 -1 -79.777 177.412 7
 0 15 -1 -359.126 377.402 1
 0 -15 1 -123.323 341.402 6
 0 15 1 243.724 184.196 7
 0 -15 1 594.058 558.367 2
 0 15 1 -79.061 251.118 1
 0 -15 1 131.734 81.2779 5
 0 -15 3 358.195 464.655 6
 0 -15 3 -35.618 73.5831 5
 0 15 3 68.383 300.34 1
 0 15 5 1118.27 654.195 1
 0 -15 5 412.327 417.255 6
 0 -15 7 1671.21 801.853 6
 0 15 7 1556.63 911.882 1
 0 15 9 185.989 204.172 1
 0 -15 9 286.888 400.97 6
 0 15 11 679.024 549.783 1
 0 -15 11 -38.812 275.149 6
 0 15 13 -33.0311 231.572 1
 0 -15 13 -417.485 340.88 6
 0 -15 15 -236.745 337.21 6
 0 15 15 -129.607 286.719 1
 0 15 17 -713.538 642.566 4
 0 15 17 -303.65 550.037 1
 0 -15 17 -296.268 404.314 6
 0 16 -20 293.926 429.103 3
 0 16 -18 793.067 632.102 5
 0 -16 -18 495.75 551.885 2
 0 16 -18 192.843 311.596 3
 0 16 -16 4972.86 1361.75 3
 0 -16 -16 6681.21 1720.22 2
 0 16 -14 10123 1838.64 3
 0 -16 -14 7004.41 1672.1 2
 0 16 -14 12894.5 1740.96 5
 0 16 -12 7117.16 1481.34 3
 0 16 -12 7432 1240.01 5
 0 -16 -12 4267.45 1324.49 2
 0 -16 -10 5031.59 1355.56 2
 0 16 -10 7367.74 1481.75 3
 0 16 -10 7831.78 1159.99 5
 0 16 -8 11412.3 1296.49 5
 0 16 -8 13043.4 2022.65 3
 0 -16 -8 8147.89 1759.77 2
 0 16 -8 10370 1525.78 1
 0 16 -6 17175.2 2324.23 3
 0 -16 -6 13107.1 2229.87 2
 0 16 -6 14546.5 1862.99 1
 0 -16 -6 14412 1222.43 8
 0 16 -6 16382.8 1474.09 5
 0 -16 -4 9525.91 1873.63 2
 0 16 -4 8597.83 1339.06 1
 0 16 -2 16928.3 1937.35 1
 0 -16 -2 24660.2 3098.64 2
 0 -16 0 54925.2 4520.75 2
 0 16 0 46444.7 3157.93 1
 0 -16 2 24134.4 2847.28 2
 0 -16 2 20570.4 3067.62 6
 0 16 2 17218.7 1953.12 1
 0 -16 4 10112.4 1930.82 6
 0 16 4 9911.22 1463.83 1
 0 16 6 15335.9 1914.62 1
 0 -16 6 14321.9 2201.78 6
 0 16 8 10392.3 1651.28 1
 0 -16 8 8523.39 1621.04 6
 0 16 10 7987.9 1415.29 1
 0 -16 10 6644.06 1372.75 6
 0 -16 12 5437.83 1268.08 6
 0 16 12 6721.94 1333.41 1
 0 16 14 9426.77 1818.65 4
 0 -16 14 11187.5 1843.9 6
 0 16 14 13115.8 1890.87 1
 0 -16 16 9302.72 1733.17 6
 0 16 16 8660.42 1587.19 1
 0 16 16 7462.93 1698.6 4
 0 16 18 1361.2 860.949 1
 0 17 -19 -201.966 360.253 5
 0 17 -19 -424.688 458.098 3
 0 17 -17 356.816 354.396 5
 0 17 -17 -564.197 655.003 3
 0 -17 -17 -433.952 562.744 2
 0 17 -15 283.33 360.119 5
 0 -17 -15 -448.164 702.871 2
 0 17 -15 777.484 484.941 3
 0 17 -13 290.295 278.374 3
 0 -17 -13 -416.883 692.25 2
 0 17 -13 252.196 318.173 5
 0 -17 -11 -419.666 592.724 2
 0 17 -11 218.328 264.052 3
 0 17 -11 -167.759 197.794 5
 0 -17 -9 -351.01 626.815 2
 0 17 -9 -628.966 579.394 3
 0 17 -9 161.196 244.438 5
 0 17 -9 -138.959 180.072 1
 0 -17 -7 -362.214 214.298 2
 0 17 -7 -144.535 301.462 5
 0 17 -7 81.4542 587.82 3
 0 17 -7 96.4843 186.192 1
 0 17 -5 644.531 506.389 1
 0 -17 -5 -25.2654 484.273 2
 0 17 -5 -677.102 568.681 3
 0 -17 -3 -279.227 520.727 2
 0 17 -3 -157.769 322.423 1
 0 -17 -1 1539.12 804.233 2
 0 17 -1 1144.02 743.377 1
 0 -17 1 465.184 679.148 2
 0 17 1 428.491 542.476 1
 0 -17 3 -738.003 570.208 6
 0 17 3 -307.355 442.636 1
 0 -17 5 -204.562 505.905 6
 0 17 5 -139.063 257.559 1
 0 -17 7 123.68 503.802 6
 0 17 7 21.7426 305.395 1
 0 -17 9 -872.43 558.894 6
 0 17 9 23.3802 328.789 1
 0 17 11 408.249 515.9 1
 0 -17 11 -504.247 516.256 6
 0 17 13 396.759 407.885 1
 0 -17 13 -635.446 597.138 6
 0 17 15 -47.0984 450.93 1
 0 17 15 -21.6227 254.513 4
 0 -17 15 -272.741 228.35 6
 0 -17 17 -34.0484 277.348 6
 0 17 17 391.33 574.511 1
 0 18 -18 2371.28 921.114 3
 0 18 -18 3438.7 1053.17 5
 0 18 -16 7650.92 1690.18 3
 0 18 -16 7556.18 1453.03 5
 0 -18 -16 6451.2 1813.21 2
 0 18 -14 -282.395 300.106 5
 0 18 -14 629.782 255.132 3
 0 -18 -14 -267.258 408.998 2
 0 18 -12 3279.59 1092.78 3
 0 18 -12 3030.02 804.269 5
 0 -18 -12 1317.3 667.702 2
 0 18 -10 6252.49 1086.82 5
 0 -18 -10 6756.24 1751.24 2
 0 18 -8 11965.2 2069.44 3
 0 18 -8 12096.1 1830.99 1
 0 -18 -8 9786.46 2069.31 2
 0 18 -8 7405.9 1097.03 5
 0 -18 -6 4603.28 1358.2 2
 0 18 -6 3198.56 1104.05 3
 0 18 -6 3389.73 975.779 1
 0 -18 -4 2031.24 877.052 2
 0 18 -4 2111.34 773.746 1
 0 -18 -2 36568.1 3855.91 2
 0 18 -2 24223.9 2481.36 1
 0 -18 0 145324 7476.74 2
 0 18 0 100816 5103.8 1
 0 -18 2 31978.9 3954.06 6
 0 -18 2 31621.4 3360.06 2
 0 18 2 27898.9 2656.62 1
 0 -18 4 2115.13 867.481 6
 0 18 4 1974.77 716.044 1
 0 -18 6 2806.79 1057.55 6
 0 18 6 2813.71 924.416 1
 0 -18 8 9868.88 1887.68 6
 0 18 8 15306.2 2042.74 1
 0 18 10 11622.1 1885.08 1
 0 -18 10 9828.02 1855.04 6
 0 -18 12 1238.36 657.226 6
 0 18 12 2503.3 867.166 1
 0 18 14 892.184 496.134 1
 0 -18 14 141.415 305.038 6
 0 18 16 8322.81 1598.69 1
 0 -18 16 9289.8 1855.38 6
 0 18 16 10717.4 2127.19 4
 0 18 18 2722.34 1012.38 1
 0 19 -17 940.679 667.522 3
 0 19 -15 191.828 535.012 3
 0 -19 -15 -1680.8 940.233 2
 0 -19 -13 -180.848 619.557 2
 0 19 -13 -200.674 374.266 3
 0 -19 -11 529.399 594.16 2
 0 19 -11 -309.658 291.362 3
 0 -19 -9 -504.285 531.096 2
 0 19 -9 927.219 848.169 3
 0 19 -7 77.2602 465.573 1
 0 -19 -7 -136.134 551.594 2
 0 19 -7 492.451 397.646 3
 0 19 -5 -33.6131 288.049 3
 0 -19 -5 579.097 502.214 2
 0 19 -5 -675.799 644.633 1
 0 -19 -3 -497.748 783.902 2
 0 19 -3 -57.8877 502.659 1
 0 -19 -1 234.174 457.023 2
 0 19 -1 145.414 320.874 1
 0 -19 1 383.663 495.136 2
 0 19 1 -416.984 591.288 1
 0 -19 3 -107.381 292.196 2
 0 -19 3 -78.6946 627.542 6
 0 19 3 67.9414 250.363 1
 0 19 5 -114.08 340.272 1
 0 -19 5 -217.241 640.959 6
 0 19 7 405.714 364.009 1
 0 -19 7 240.167 413.342 6
 0 -19 9 -767.705 748.679 6
 0 19 9 -46.9525 463.507 1
 0 19 11 302.173 381.292 1
 0 -19 11 -270.398 425.305 6
 0 19 13 -263.804 306.622 1
 0 -19 13 -1462.16 765.746 6
 0 19 15 -309.201 519.804 1
 0 19 15 402.179 624.231 4
 0 19 17 -366.882 357.025 1
 0 20 -14 64.0223 469.734 3
 0 20 -12 179.844 353.178 3
 0 -20 -12 -268.29 738.726 2
 0 -20 -10 1876.43 888.675 2
 0 20 -10 2917.17 1061.05 3
 0 20 -8 1384.42 744.119 1
 0 20 -8 1238.86 742.104 3
 0 -20 -8 3524.88 1259.44 2
 0 20 -6 4550.35 1401.17 3
 0 20 -6 3626.84 1005.78 1
 0 -20 -6 5165.94 1605.36 2
 0 20 -4 -291.297 409.694 1
 0 -20 -4 -226.459 761.597 2
 0 20 -2 4851.17 1210.93 1
 0 -20 -2 8776.75 1943.58 2
 0 -20 0 35930.9 3796.42 2
 0 20 0 23162.1 2601.03 1
 0 -20 2 6068.01 1566.86 2
 0 20 2 3935.29 1052.19 1
 0 -20 4 80.1951 398.063 6
 0 20 4 486.036 368.941 1
 0 -20 4 140.647 241.017 2
 0 20 6 3460.94 1066.4 1
 0 -20 6 2952.13 1255.21 6
 0 -20 8 2536.81 1066.6 6
 0 20 8 1770.76 685.112 1
 0 -20 10 1831.84 880.451 6
 0 20 10 2103.64 825.379 1
 0 -20 12 -130.441 218.562 6
 0 20 12 -177.082 509.641 1
 0 20 14 340.454 316.827 1
 0 20 16 1823.48 845.867 1
 0 21 -13 386.289 471.551 3
 0 -21 -11 -255.036 746.015 2
 0 21 -11 29.2062 397.763 3
 0 21 -9 58.23 479.234 3
 0 -21 -9 -1605.34 918.942 2
 0 21 -7 35.1734 686.966 3
 0 21 -7 -933.255 621.326 1
 0 -21 -7 -260.968 515.804 2
 0 -21 -5 -42.7473 389.931 2
 0 21 -5 601.196 755.775 3
 0 21 -5 342.801 509.924 1
 0 21 -3 -462.291 521.499 1
 0 -21 -3 -100.267 355.623 2
 0 21 -1 -480.19 375.072 1
 0 -21 -1 406.256 570.834 2
 0 -21 1 -196.2 532.566 2
 0 21 1 -608.371 595.229 1
 0 -21 3 352.662 316.525 6
 0 -21 3 -108.604 465.016 2
 0 21 3 -29.4104 447.193 1
 0 21 5 -143.87 407.991 1
 0 -21 5 -401.703 359.35 6
 0 -21 5 921.627 689.97 2
 0 21 7 459.08 594.17 1
 0 -21 7 160.245 439.937 6
 0 -21 9 -302.435 430.966 6
 0 21 9 -455.942 444.721 1
 0 -21 11 -259.473 373.674 6
 0 21 11 -384.54 610.409 1
 0 21 13 -430.514 596.436 1
 0 22 -10 2531.29 1202.32 3
 0 -22 -10 2239.74 1119.53 2
 0 22 -8 8735.04 1947.36 3
 0 -22 -8 6612.01 1882.92 2
 0 22 -8 7824.96 1695.46 1
 0 22 -6 8628.13 1743.35 1
 0 22 -6 11563.7 2273.33 3
 0 -22 -6 9423.33 2327.57 2
 0 -22 -4 2249.32 1014.72 2
 0 22 -4 2727.81 857.988 1
 0 22 -4 3256.56 1204.89 3
 0 22 -2 3172.06 1097.81 1
 0 -22 -2 908.493 748.146 2
 0 22 0 28479.9 3096.19 1
 0 -22 0 33449.8 3830.34 2
 0 22 2 1102.43 658.524 1
 0 -22 2 2228.26 865.358 2
 0 -22 4 4008.96 1258.85 2
 0 22 4 1767.31 803.383 1
 0 -22 4 1874.48 964.626 6
 0 22 6 8713.09 1736.09 1
 0 -22 6 8231.26 1963.03 6
 0 22 8 6325.7 1437.51 1
 0 -22 8 6688.24 1722.24 6
 0 22 10 1951.81 797.447 1
 0 -22 10 1054.03 600.983 6
 0 22 12 5991.53 1548.84 1
 0 23 -9 -289.89 596.257 3
 0 23 -7 -420.552 460.445 3
 0 -23 -7 -886.829 705.903 2
 0 23 -7 -248.93 422.37 1
 0 -23 -5 822.959 695.177 2
 0 23 -5 -382.19 570.175 1
 0 23 -5 445.773 631.782 3
 0 23 -3 783.245 862.453 1
 0 -23 -3 689.892 434.554 2
 0 -23 -1 1468.01 1032.51 2
 0 23 -1 725.164 717.059 1
 0 23 1 -222.052 268.943 1
 0 -23 1 1780.83 1124.25 2
 0 23 3 -274.266 326.154 1
 0 -23 3 -184.041 630.385 2
 0 -23 5 -226.229 515.02 2
 0 23 5 -489.471 538.93 1
 0 -23 5 -305.871 490.681 6
 0 23 7 -1082.4 713.365 1
 0 -23 7 42.4732 423.211 6
 0 23 9 -252.126 586.955 1
 0 24 -6 1470.23 782.052 1
 0 -24 -4 2069.23 941.145 2
 0 24 -4 2288.37 935.265 1
 0 24 -4 2268.4 1043.52 3
 0 24 -2 7606.1 1731.38 1
 0 -24 -2 12739.4 2498.01 2
 0 24 0 43233.2 4061.44 1
 0 -24 0 60176.9 5128.19 2
 0 -24 2 11470.5 2228.03 2
 0 24 2 9126.81 1910.89 1
 0 24 4 1470.58 774.95 1
 0 -24 4 2072.58 929.859 2
 0 -24 6 2134.58 1134.41 6
 0 -24 6 1203.59 725.528 2
 0 25 -5 336.523 442.466 1
 0 25 -3 -394.258 442.928 1
 0 25 -1 264.902 462.28 1
 -1 0 -23 991.141 809.568 5
 1 0 -23 333.777 674.844 5
 1 0 -21 -314.083 472.12 5
 -1 0 -21 -1951.37 801.293 5
 -1 0 -19 -386.037 596.011 5
 1 0 -19 -582.833 560.948 5
 -1 0 -17 494.561 371.844 3
 1 0 -17 436.155 718.269 5
 1 0 -17 232.177 317.708 3
 -1 0 -17 1838.2 855.554 5
 -1 0 -15 99.7729 399.143 5
 1 0 -15 169.175 210.481 3
 -1 0 -15 239.539 194.087 3
 1 0 -15 67.1547 403.427 5
 -1 0 -13 0.47153 294.517 5
 1 0 -13 84.3668 115.446 3
 -1 0 -13 87.3496 116.089 3
 1 0 -13 12.4821 187.907 5
 1 0 -11 46.1233 123.976 3
 -1 0 -11 81.8041 120.009 3
 -1 0 -11 258.264 184.964 5
 1 0 -11 115.045 140.527 5
 1 0 -9 -43.855 157.153 5
 -1 0 -9 20.763 80.7607 3
 1 0 -9 -61.8119 116.89 3
 -1 0 -9 -51.4585 101.175 5
 1 0 -7 291.63 204.796 5
 -1 0 -7 153.096 164.823 5
 1 0 -7 96.2163 106.406 3
 -1 0 -7 7.47674 71.9196 4
 1 0 -7 104.164 111.903 2
 -1 0 -7 67.6838 62.9056 3
 -1 0 -5 75.4084 92.9134 2
 -1 0 -5 167.75 151.117 4
 1 0 -5 48.6337 75.8597 3
 1 0 -5 118.375 145.693 5
 -1 0 -5 64.2637 29.8773 3
 -1 0 -5 3.3104 73.9 5
 1 0 -5 -16.2203 56.1855 2
 1 0 3 199.006 112.471 4
 -1 0 3 86.4198 66.4681 2
 -1 0 3 -66.2241 77.6981 5
 1 0 3 264.936 96.4229 2
 -1 0 3 39.529 66.2772 7
 1 0 3 140.699 56.1411 3
 -1 0 3 129.307 88.9077 3
 1 0 3 167.552 82.9253 5
 1 0 5 92.2087 128.628 4
 1 0 5 -17.3497 40.0862 3
 -1 0 5 12.3712 81.7469 7
 1 0 5 152.355 139.603 5
 -1 0 5 -26.4502 42.5029 3
 -1 0 5 -39.3627 58.6394 5
 -1 0 5 17.8364 57.6236 4
 1 0 5 139.424 102.014 2
 -1 0 5 -12.798 71.8432 2
 -1 0 5 103.781 75.3497 1
 -1 0 7 137.418 140.725 4
 -1 0 7 200.224 159.435 7
 -1 0 7 83.7144 110.889 2
 -1 0 7 361.451 206.356 5
 1 0 7 242.977 168.312 4
 1 0 7 -19.0006 120.533 5
 1 0 7 95.5066 51.3333 1
 -1 0 7 185.701 116.771 3
 -1 0 7 29.9609 48.4229 1
 1 0 7 132.063 128.799 2
 1 0 7 -31.9721 40.5132 3
 -1 0 9 9.43821 53.5138 1
 -1 0 9 -7.43587 74.8744 3
 1 0 9 116.086 67.3095 1
 1 0 9 3.15823 122.78 3
 -1 0 9 37.7241 158.858 4
 1 0 9 116.831 161.91 4
 -1 0 11 -4.22507 152.81 4
 1 0 11 -242.822 364.768 4
 -1 0 11 124.571 94.218 1
 1 0 11 -26.5416 58.4666 3
 1 0 11 11.0294 57.5274 1
 -1 0 13 59.5796 99.0895 1
 -1 0 13 56.9944 98.7318 4
 1 0 13 130.051 71.9724 1
 -1 0 15 42.9454 122.206 4
 -1 0 15 62.9247 109.878 1
 1 0 15 173.408 216.827 4
 1 0 17 286.21 394.018 4
 -1 0 17 56.7812 167.735 4
 -1 0 19 -381.031 359.261 4
 1 0 19 -296.997 393.938 4
 1 0 21 -193.523 287.934 4
 -1 0 21 489.069 396.234 4
 -1 0 23 635.785 531.745 4
 1 0 23 246.169 442.438 4
 -1 -1 -22 2792.58 911.031 5
 1 1 -22 2390.76 926.752 5
 1 -1 -22 2497.86 950.501 5
 -1 1 -22 1742.89 872.616 5
 1 -1 -20 162.318 348.841 5
 -1 -1 -20 -798.044 515.147 5
 -1 1 -20 -302.144 518.217 5
 1 1 -20 26.1548 284.534 5
 1 1 -20 188.467 220.799 3
 -1 1 -18 5502.79 806.084 3
 1 -1 -18 7296.5 1310.54 5
 -1 1 -18 7107.9 1340.48 5
 1 1 -18 5218.08 1109.65 5
 1 1 -18 5049.32 821.936 3
 -1 -1 -18 6331.23 1266.08 5
 -1 -1 -16 20302.2 2090.77 5
 1 1 -16 18191 1457.77 3
 -1 1 -16 19189.9 1420.54 3
 1 1 -16 23193.1 2228.5 5
 1 -1 -16 19711.5 2034.43 5
 -1 1 -16 20053.9 2142.8 5
 -1 -1 -14 683.822 406.661 5
 1 -1 -14 1408.92 364.688 3
 -1 1 -14 2046.51 646.322 5
 1 -1 -14 983.587 520.564 5
 -1 1 -14 1428.59 385.647 3
 1 1 -14 1215.8 355.121 3
 1 1 -14 683.816 343.707 5
 -1 -1 -14 994.046 305.631 3
 1 -1 -12 -125.759 282.379 5
 1 1 -12 377.727 216.893 5
 -1 -1 -12 231.638 117.274 3
 1 -1 -12 418.652 215.049 3
 -1 1 -12 119.827 207.148 5
 -1 -1 -12 283.54 234.175 5
 -1 1 -12 360.435 159.43 3
 1 1 -12 89.7423 134.37 3
 1 1 -10 75.2962 136.372 3
 1 -1 -10 93.7747 113.514 3
 -1 1 -10 280.462 201.171 5
 -1 -1 -10 120.909 147.294 3
 -1 -1 -10 134.238 195.324 2
 1 -1 -10 53.7609 84.3513 2
 -1 -1 -10 252.634 236.531 5
 1 1 -10 120.34 189.522 5
 1 -1 -10 25.2217 131.548 5
 -1 1 -10 109.373 68.3954 3
 -1 -1 -8 8248.98 885.574 5
 1 -1 -8 8836.54 806.323 2
 1 -1 -8 8873.53 891.451 5
 -1 -1 -8 9570.4 868.232 2
 -1 1 -8 8515.96 878.619 4
 1 -1 -8 8791.63 691.832 3
 -1 1 -8 8302.29 638.003 3
 1 1 -8 8806.28 721.594 3
 1 1 -8 10091.6 988.859 5
 -1 -1 -8 7957.72 604.41 3
 -1 1 -8 9236 940.756 5
 1 -1 -6 10467.1 663.714 3
 1 1 -6 10018.2 676.087 3
 -1 1 -6 10980.8 828.721 4
 -1 -1 -6 11430.5 826.952 2
 1 1 -6 11024.1 883.097 5
 1 -1 -6 11138.2 850.01 5
 -1 1 -6 10128.9 843.871 5
 -1 -1 -6 10443.1 587.552 3
 -1 1 -6 10743.6 623.67 3
 -1 -1 -6 9450.84 488.524 1
 -1 -1 -6 9975.84 830.511 5
 1 -1 -6 10681.6 754.621 2
 1 1 -6 10138.1 762.718 4
 1 -1 -4 677.385 173.407 2
 -1 -1 -4 716.155 129.34 3
 1 -1 -4 618.603 142.436 3
 -1 1 -4 787.697 172.699 4
 1 1 -4 736.718 165.948 3
 1 -1 -4 751.472 199.408 7
 -1 -1 -4 657.689 159.846 2
 -1 1 -4 759.723 140.868 3
 -1 -1 -4 736.754 188.866 4
 -1 1 -4 795.373 210.935 5
 1 1 -4 823.577 180.269 4
 -1 -1 -4 589.083 128.4 5
 1 1 -4 694.559 202.936 5
 -1 -1 -4 833.973 135.693 1
 1 -1 -4 648.803 192.408 5
 1 1 4 489.794 159.511 5
 -1 1 4 587.687 145.648 2
 1 1 4 633.053 126.162 1
 -1 1 4 395.715 120.486 3
 1 1 4 475.63 151.992 4
 -1 -1 4 647.144 176.948 7
 -1 -1 4 507.791 136.719 3
 -1 -1 4 679.97 173.979 5
 -1 1 4 784.442 207.754 7
 -1 1 4 573.717 171.393 5
 1 -1 4 679.12 166.181 4
 -1 -1 4 654.368 156.853 4
 1 1 4 456.93 111.221 3
 1 1 4 485.507 153.605 2
 -1 1 4 469.958 121.159 1
 1 -1 4 720.083 185.276 5
 1 -1 4 688.662 135.453 3
 -1 1 6 9603.34 636.391 3
 1 -1 6 10056.1 610.766 3
 1 -1 6 10322.2 837.721 5
 -1 1 6 11236.9 896.501 4
 -1 -1 6 10344.1 695.185 3
 1 -1 6 10163.7 743.896 2
 1 1 6 10373 582.558 3
 1 1 6 10446 851.732 4
 -1 -1 6 9861.47 691.683 4
 -1 -1 6 10130.1 836.108 5
 -1 1 6 10287 740.223 2
 -1 -1 6 10150.2 802.897 7
 1 -1 6 10147 738.478 4
 -1 1 6 10274.3 806.494 5
 1 1 6 10087.3 508.751 1
 1 1 6 10678 773.786 2
 -1 1 6 10324.8 589.505 1
 -1 -1 6 10469.2 724.877 2
 1 1 6 10113.1 809.773 5
 -1 1 6 10027.2 849.092 7
 1 1 8 9142.25 646.678 3
 -1 1 8 9210.7 803.791 2
 1 1 8 7657.98 497.577 1
 -1 -1 8 8723.25 770.889 4
 -1 -1 8 8714.33 770.089 2
 1 -1 8 8835.47 788.426 4
 -1 -1 8 8341.51 850.225 7
 -1 -1 8 8638.73 711.074 3
 1 -1 8 8299.65 644.093 3
 -1 1 8 8178.36 568.094 1
 -1 1 8 8664.6 691.342 3
 -1 1 8 8737.95 883.031 4
 -1 -1 8 8454.28 456.737 1
 1 1 8 8912.31 883.834 4
 1 -1 10 87.2818 73.9768 3
 -1 -1 10 194.966 88.1976 1
 -1 1 10 44.1566 132.524 4
 -1 1 10 94.6375 49.4597 3
 -1 1 10 226.26 133.311 1
 1 1 10 131.692 80.9121 1
 1 -1 10 44.694 107.123 4
 -1 -1 10 26.6412 98.5229 4
 1 1 10 309.44 220.918 4
 1 1 10 60.1606 70.2142 3
 1 1 12 324.137 114.669 1
 1 -1 12 -54.123 126.606 4
 -1 1 12 -95.7008 142.695 4
 -1 1 12 197.165 111.921 1
 1 1 12 21.3735 257.741 4
 -1 -1 12 43.7646 186.889 4
 -1 -1 12 140.004 80.4008 1
 1 1 14 1270.93 409.085 4
 1 1 14 1331.23 247.399 1
 -1 -1 14 908.79 158.479 1
 -1 -1 14 900.187 216.475 4
 -1 1 14 1365.07 503.37 4
 -1 1 14 1036.44 220.546 1
 1 -1 14 1205.13 389.765 4
 -1 1 16 19036.6 1815.74 4
 1 -1 16 19705.9 1725.53 4
 1 1 16 18971.7 1829.51 4
 -1 -1 16 20926.6 1732.47 4
 1 1 18 5242.98 1001.59 4
 -1 1 18 5113.93 923.942 4
 1 -1 18 5858.34 1022.97 4
 -1 -1 18 5264.58 959.354 4
 -1 -1 20 -204.231 282.458 4
 -1 1 20 -249.209 377.148 4
 1 1 20 -25.4629 389.84 4
 1 -1 20 -43.747 277.031 4
 -1 -1 22 1429.03 601.241 4
 -1 1 22 1822.17 600.329 4
 1 -1 22 2684.83 806.708 4
 1 1 22 790.176 469.357 4
 1 1 24 773.589 494.651 4
 1 -1 24 218.862 261.554 4
 -1 -1 24 753.868 496.283 6
 -1 1 24 372.915 496.198 4
 1 -2 -23 7891.45 1702.58 5
 -1 -2 -23 5217.56 1429.14 5
 1 2 -23 5427.35 1440.54 5
 -1 2 -23 5376.22 1414.88 5
 -1 -2 -21 -370.948 601.593 5
 1 2 -21 -83.6917 492.136 5
 -1 2 -21 42.2006 389.403 5
 1 -2 -21 187.242 205.047 5
 1 2 -21 -122.75 288.981 3
 -1 2 -19 5374.22 1149.4 5
 1 2 -19 6941.49 1363.83 5
 1 -2 -19 7419.01 1401.51 5
 1 2 -19 7016.18 1004.58 3
 -1 2 -19 5266.27 833.718 3
 -1 -2 -19 7655.14 1447.27 5
 -1 -2 -17 12937.8 1744.14 5
 1 2 -17 13347.5 1785.5 5
 -1 2 -17 12719.8 1752.69 5
 1 -2 -17 14872.6 1854.93 5
 1 2 -17 12625.5 1324.29 3
 -1 2 -17 13006.5 1230.84 3
 -1 -2 -15 8579.3 1297.58 5
 -1 2 -15 10034 1414.88 5
 -1 2 -15 7911.7 907.019 3
 1 2 -15 9632.24 1384.71 5
 1 2 -15 9106.55 1027.02 3
 1 -2 -15 9403.58 1334.85 5
 -1 -2 -13 686.017 319.29 5
 1 -2 -13 877.272 325.697 2
 1 -2 -13 831.511 432.387 5
 -1 2 -13 851.144 347.268 5
 -1 -2 -13 1328.24 438.642 2
 1 2 -13 1068.41 346.592 3
 1 2 -13 1754.27 599.084 5
 -1 2 -13 696.913 236.084 3
 1 -2 -11 7939.26 924.726 2
 -1 2 -11 6389.54 705.067 3
 1 2 -11 7553.02 1007.54 5
 1 -2 -11 7370.23 961.072 5
 -1 2 -11 7581.23 1021.26 5
 1 2 -11 6469.9 754.582 3
 -1 -2 -11 7286.3 906.353 2
 -1 -2 -11 6538.85 926.895 5
 -1 2 -9 9689.45 963.667 4
 1 2 -9 10685.3 1117.8 5
 -1 -2 -9 9184.21 915.177 2
 -1 -2 -9 8504.59 593.964 1
 1 2 -9 9873.74 954.428 4
 -1 2 -9 8881.8 731.936 3
 1 2 -9 8584.3 766.099 3
 1 -2 -9 9640.11 973.708 5
 -1 -2 -9 10701.2 1067.69 5
 1 -2 -9 9166.48 893.522 2
 -1 2 -9 9576.14 1038.52 5
 -1 2 -7 47909.2 2009.82 5
 1 2 -7 48036.5 2043.42 5
 1 -2 -7 46326.7 1872.47 5
 -1 -2 -7 46051.8 1345.96 1
 1 -2 -7 50054.1 1832.07 2
 -1 2 -7 46186.8 1820.51 4
 1 2 -7 46174.7 1730.79 4
 -1 2 -7 45502.9 1505.23 3
 -1 -2 -7 46364.4 1897.42 5
 1 2 -7 48371.6 1647.45 3
 -1 -2 -7 47316.9 1858.07 2
 1 -2 -5 20215.5 853.3 1
 -1 2 -5 20462.5 890.746 3
 1 -2 -5 21061.1 1033.93 5
 1 2 -5 20159.5 902.348 4
 -1 -2 -5 22347.9 1093.39 2
 -1 -2 -5 19962.7 834.162 1
 -1 2 -5 22063 1157.84 5
 -1 2 -5 22897.2 1063.58 4
 1 2 -5 21600.6 1145.74 5
 -1 -2 -5 20740.8 1068.82 5
 1 -2 -5 21346.9 1044.65 2
 1 2 -5 21099.6 977.967 3
 1 2 -3 10869.1 460.219 4
 1 -2 -3 9856.25 558.441 1
 -1 2 -3 10871 630.206 3
 1 2 -3 10990.8 624.771 3
 -1 2 -3 10457.2 564.133 4
 1 -2 -3 10694.6 550.011 5
 -1 2 -3 10764.2 638.446 5
 -1 -2 -3 10070.8 558.599 1
 1 -2 -3 11314.3 707.082 7
 1 2 -3 10155.2 610.196 6
 -1 -2 -3 10619.4 634.386 2
 -1 -2 -3 10760.3 601.426 5
 1 2 -3 11202.1 664.195 5
 1 -2 -3 10280 619.704 2
 1 2 3 10539.6 593.33 5
 -1 -2 3 10825.2 419.746 4
 -1 2 3 11633.8 711.187 7
 1 2 3 10682.8 631.457 2
 -1 2 3 11081.1 590.487 1
 -1 -2 3 10412.5 515.952 7
 -1 -2 3 11415.1 616.588 6
 -1 2 3 10324.9 544.821 5
 1 -2 3 10675.9 629.876 3
 -1 2 3 11628.3 644.353 2
 1 2 3 10301.6 555.963 1
 1 -2 3 11460.3 548.815 4
 -1 -2 3 10993.3 621.9 3
 -1 -2 3 10678.1 650.881 5
 1 -2 3 10611.2 622.274 5
 1 2 5 21634.7 1218.78 4
 1 2 5 20168.3 831.255 1
 1 2 5 21800 1059.59 2
 -1 -2 5 20601.6 952.005 3
 -1 2 5 22124.1 922.631 1
 1 -2 5 20651.7 919.765 3
 1 2 5 19630.4 1026.73 5
 1 -2 5 20569.2 919.285 4
 1 2 5 19247.9 709.727 8
 -1 -2 5 21742.8 851.74 4
 -1 -2 5 21937.9 1017.11 7
 1 2 5 21323.1 790.72 3
 -1 2 5 21453.3 1019.45 2
 1 -2 5 19508.3 1074.04 5
 -1 2 5 21424.8 911.234 3
 -1 2 5 22378.5 1217.28 7
 -1 -2 5 20708.8 1119.84 5
 -1 2 5 20759.9 1028.97 5
 1 2 7 45114.3 1752.5 2
 -1 2 7 42793.6 1983.01 4
 1 -2 7 43189 1867.56 5
 1 -2 7 42578.3 1476.67 3
 -1 2 7 43544.9 1984.72 7
 1 -2 7 41282.3 1546.47 4
 -1 2 7 42774.4 1484.48 3
 -1 2 7 46961.8 1749.72 2
 1 2 7 42245.5 1779.01 5
 1 2 7 39531.2 1251.21 1
 -1 -2 7 43009.5 1558.26 3
 -1 -2 7 42102.1 1592.97 2
 1 2 7 40339.6 1256.08 8
 1 2 7 46673.3 2032.96 4
 -1 2 7 43771.5 1408.48 1
 -1 -2 7 42633.7 1872.95 5
 -1 -2 7 42670 1726.08 7
 -1 2 7 43442.4 1781.32 5
 -1 -2 7 41621.8 1465.27 4
 1 2 7 43057.8 1334.64 3
 -1 -2 9 11251.6 892.181 3
 1 -2 9 10590.6 812.511 3
 -1 2 9 10816.9 1097.77 4
 -1 2 9 10099.9 730.953 1
 1 2 9 10145.7 681.685 1
 -1 -2 9 11052.1 868.298 4
 1 2 9 11530.1 1138.9 4
 1 -2 9 10169 881.484 4
 -1 2 9 10863.6 835.313 3
 1 2 9 11201.5 778.521 3
 1 2 9 11172.9 769.741 8
 -1 2 11 7121.35 972.489 4
 1 2 11 6485.89 577.621 1
 -1 -2 11 5636.73 393.031 1
 -1 -2 11 7313.74 809.102 4
 1 2 11 6830.99 672.984 3
 -1 2 11 6783.86 618.923 1
 1 2 11 6272.41 649.492 8
 1 2 11 6698.51 944.021 4
 1 -2 11 7413.42 833.518 4
 -1 2 13 866.48 251.367 1
 1 2 13 907.95 233.438 1
 1 -2 13 711.076 247.363 4
 -1 -2 13 1223.09 393.267 4
 1 2 13 1255.26 446.339 4
 -1 -2 13 754.768 135.893 1
 -1 2 13 1592.5 547.667 4
 1 2 15 11168.3 1392.6 4
 -1 2 15 5667.28 608.609 1
 -1 2 15 9679.47 1321.79 4
 -1 -2 15 9492.37 1098.86 4
 1 2 15 5853.58 575.898 1
 1 -2 15 8928.77 1067.45 4
 1 -2 17 11779.1 1334.51 4
 1 2 17 13831.1 1639.83 4
 -1 -2 17 13013.4 1392.06 4
 -1 2 17 12457.7 1581.28 4
 1 2 19 6575.32 1166.09 4
 -1 2 19 7345.06 1248.03 4
 -1 -2 19 6592.7 1050.92 4
 1 -2 19 6911.55 1088.56 4
 1 2 21 439.457 492.923 4
 -1 -2 21 -37.7691 166.61 4
 -1 2 21 -69.318 198.441 4
 1 -2 21 142.909 380.672 4
 1 2 23 4560.31 1128.22 4
 1 -2 23 5173.02 1040.54 4
 -1 2 23 5288.45 1157.15 4
 -1 -2 23 5713.69 1170.94 6
 1 2 25 1889.77 788.939 4
 -1 2 25 1337.19 640.971 4
 1 3 -22 1663.15 746.412 5
 1 -3 -22 879.234 563.173 5
 -1 3 -22 1381.52 804.355 5
 -1 -3 -22 1475.01 783.204 5
 1 3 -20 3923.42 1155.54 5
 -1 3 -20 3649.43 742.306 3
 1 -3 -20 3344.89 976.94 5
 -1 3 -20 3167.62 949.336 5
 1 3 -20 2481.01 642.664 3
 -1 -3 -20 2671.87 876.019 5
 -1 3 -18 2920.82 609.653 3
 -1 -3 -18 3248.85 1008.7 5
 1 3 -18 2932.96 838.276 5
 1 3 -18 2328.24 538.218 3
 1 -3 -18 2057.62 669.045 5
 -1 3 -18 3381.03 884.304 5
 -1 3 -16 628.796 276.106 3
 1 3 -16 392.67 203.215 5
 -1 3 -16 931.017 511.68 5
 -1 -3 -16 683.168 432.732 5
 1 3 -16 676.393 291.018 3
 1 -3 -16 340.946 276.248 5
 1 -3 -14 12878.4 1360.52 2
 -1 3 -14 12336.3 1132.22 3
 1 3 -14 12200.2 1496.26 5
 1 3 -14 11415.2 1121.53 3
 1 -3 -14 13363.5 1527.6 5
 -1 -3 -14 13402.4 1421.75 2
 -1 3 -14 13738.1 1670.25 5
 -1 -3 -14 12165.3 1448.51 5
 -1 3 -12 7465.39 813.937 3
 1 3 -12 7415.83 849.154 3
 -1 -3 -12 7057.71 991.528 5
 1 -3 -12 7877.88 984.307 2
 1 -3 -12 6669.98 1000.72 5
 -1 -3 -12 8550.6 1041.35 2
 -1 3 -12 8597.71 1141.11 5
 1 3 -12 8052.97 1112.64 5
 1 3 -10 12968.8 1045.45 3
 1 -3 -10 13449.2 1238.92 5
 -1 -3 -10 14465.6 1283.41 5
 -1 -3 -10 13741 1209.32 2
 -1 3 -10 16354.2 1439.38 5
 -1 -3 -10 12639 839.916 1
 1 3 -10 14098.3 1334.27 5
 1 -3 -10 13517.5 1190.65 2
 -1 3 -10 13322.5 991.989 3
 1 3 -10 12632.1 1124.2 4
 1 -3 -8 9283.64 881.616 5
 -1 3 -8 10006.3 1005.41 5
 -1 -3 -8 8714.38 877.919 5
 -1 3 -8 8940.14 751.871 3
 1 -3 -8 8429.8 835.394 2
 1 3 -8 8117.36 916.465 5
 -1 3 -8 9108.98 868.801 4
 -1 -3 -8 8874.44 887.768 2
 1 3 -8 8701.03 795.376 3
 1 3 -8 8090.58 764.868 4
 1 -3 -8 8409.46 681.525 1
 -1 -3 -8 7565.92 641.346 1
 -1 -3 -6 25656.2 1296.52 5
 -1 3 -6 26602.5 1252.84 4
 -1 -3 -6 26460.3 1352.83 2
 -1 3 -6 31097.4 1520.17 5
 1 3 -6 26076.2 1419.54 5
 1 -3 -6 25678 1311.28 2
 -1 3 -6 24545.5 1157.51 3
 1 -3 -6 24742.9 1109.59 1
 1 3 -6 25488.5 1117.49 4
 1 3 -6 25628.3 1242.75 3
 1 -3 -6 24449.1 1223.72 5
 -1 -3 -6 23587.7 1073.64 1
 1 -3 -4 23646.2 1138.01 2
 1 3 -4 22396.5 792.026 4
 -1 3 -4 22802.7 946.654 4
 -1 -3 -4 19550.1 578.584 8
 -1 -3 -4 21790.1 968.697 1
 -1 -3 -4 22225.8 979.001 5
 1 3 -4 22300.9 1074.26 3
 -1 3 -4 24194 834.737 1
 1 -3 -4 21929.8 907.157 5
 1 3 -4 21275.2 1043.01 6
 -1 -3 -4 23239 1120.37 2
 1 3 -4 23459.1 1130.85 5
 1 -3 -4 23260.7 1183.08 7
 -1 3 -4 21930.1 1100.78 3
 -1 3 -4 27118 1164.47 5
 1 -3 -4 22633.6 999.405 1
 -1 -3 -2 83688.3 2047.59 2
 -1 3 -2 89508 1935.34 6
 -1 3 -2 83451.5 1764.73 4
 1 -3 -2 81283.5 2233.98 2
 1 3 -2 81819.5 1792.73 1
 -1 -3 -2 75427.2 1752.05 1
 -1 3 -2 82630 1528.95 5
 1 3 -2 74147.7 1939.55 3
 1 3 -2 72516.3 1992.96 6
 1 -3 -2 77354 1710.7 1
 1 -3 -2 76393.2 1088.69 5
 1 3 -2 78259.8 1598.43 5
 -1 3 -2 81650.2 1571.44 1
 1 -3 -2 81237.5 1762.74 7
 1 3 -2 79600.1 1346.29 4
 1 -3 0 10333.7 439.746 7
 1 -3 0 10944 587.817 1
 -1 -3 0 9656.82 611.651 1
 -1 3 0 13284.2 1205.97 6
 -1 -3 2 78363.8 2056.23 6
 1 -3 2 77264.3 1438.89 1
 -1 -3 2 80476.8 1738.59 1
 -1 3 2 80348.3 2168.15 2
 -1 3 2 79536.1 1742.43 1
 1 3 2 77116.1 1745.08 1
 -1 3 2 78064.2 1092.6 5
 -1 -3 2 76491.1 1582.79 5
 -1 3 2 80580.9 1770.58 7
 1 -3 2 89307.2 1884.44 6
 1 3 2 82182.8 1940.02 2
 1 -3 2 81416.8 1517.51 5
 -1 -3 4 21196.2 872.818 1
 1 -3 4 25682.2 1078.72 6
 -1 -3 4 22466.8 842.709 7
 1 3 4 22562.1 992.26 1
 1 -3 4 24690.5 925.842 4
 -1 -3 4 23267.1 1093.2 3
 1 -3 4 25406.7 1124.31 5
 -1 -3 4 24300.9 1076.87 6
 -1 3 4 22475.6 919.31 5
 1 3 4 22759.4 1085.28 2
 1 3 4 23297.3 557.938 8
 -1 -3 4 22401 1091.99 5
 -1 -3 4 22958.9 726.652 4
 -1 3 4 23264.9 1185.05 7
 -1 3 4 22969 1008.38 1
 1 -3 4 23900.2 726.402 1
 -1 3 4 23588.1 1117.13 2
 1 3 4 22785.3 985.216 5
 -1 -3 6 24508.3 1220.12 6
 1 -3 6 26970.1 1115.38 4
 1 3 6 22953.5 744.978 8
 -1 3 6 24110.6 1082.52 3
 -1 -3 6 22425.4 1292.71 5
 1 3 6 24097.2 982.864 3
 -1 3 6 25082.3 1228.88 5
 1 3 6 26550.3 1311.76 2
 -1 -3 6 25126.8 1166.1 7
 1 3 6 24928.4 1526.2 4
 -1 3 6 23648.2 1412.65 7
 -1 -3 6 24107.4 1190.43 3
 1 -3 6 26481 1379.08 5
 -1 3 6 23906.7 1093.55 1
 1 -3 6 24453.1 646.187 1
 -1 -3 6 25964.3 989.807 4
 -1 -3 6 21736.6 847.188 1
 1 -3 6 24162.3 1183.71 3
 -1 3 6 26521.4 1297.53 2
 1 3 6 23016.1 1060.2 1
 1 3 6 23826.1 1213.65 5
 1 3 8 8015.92 634.396 3
 -1 3 8 8663.48 849.538 5
 -1 -3 8 7998.27 782.646 7
 1 -3 8 8175.57 718.263 4
 1 3 8 7973.25 543.443 8
 -1 -3 8 8662.36 780.805 3
 -1 -3 8 8427.36 675.59 4
 -1 3 8 8556.21 708.102 1
 1 -3 8 9318.84 805.849 3
 1 3 8 8057.56 953.905 4
 -1 3 8 8257.76 703.487 3
 -1 -3 8 8303.81 510.994 1
 1 3 8 7587.24 658.206 1
 -1 3 10 13494.2 1347.82 4
 -1 -3 10 12394 624.515 1
 1 3 10 14369.3 947.369 3
 1 3 10 13678.3 1334.06 4
 -1 -3 10 13302.3 982.692 4
 1 3 10 13800.8 894.181 1
 1 -3 10 14295.8 1060.36 3
 1 3 10 13391.8 828.492 8
 1 -3 10 14761.6 1094.26 4
 -1 3 10 13773.6 957.169 1
 -1 3 12 7142.88 713.025 1
 1 3 12 7930.78 713.612 1
 -1 -3 12 6790.73 404.02 1
 1 3 12 7186.03 679.436 8
 1 -3 12 8315.13 917.359 4
 -1 -3 12 7707.19 831.752 4
 1 3 12 7885.08 1093.26 4
 -1 3 12 7979.6 1140.58 4
 -1 -3 12 6696.23 428.088 1
 -1 3 14 11277 1397.59 4
 1 -3 14 14110.6 1270.44 4
 1 3 14 12109.7 1452.18 4
 1 3 14 11535.4 917.188 1
 -1 3 14 11690.6 952.512 1
 -1 -3 14 11601.4 1119.94 4
 -1 3 16 828.055 378.618 4
 -1 -3 16 583.032 227.615 4
 1 3 16 83.6353 110.703 1
 -1 3 16 277.843 145.479 1
 1 -3 16 376.161 237.015 4
 1 3 16 276.283 306.397 4
 -1 -3 18 3273.46 713.804 4
 1 3 18 3169.79 757.597 4
 1 -3 18 3186.83 708.576 4
 -1 3 18 2353.65 762.916 4
 -1 3 20 3306.79 841.724 4
 -1 -3 20 2843.08 656.152 4
 1 3 20 4383.21 999.875 4
 1 -3 20 3836.56 793.495 4
 -1 -3 20 4037.21 909.073 6
 1 -3 22 438.734 304.101 6
 1 -3 22 1911.92 600.724 4
 -1 3 22 1215.04 610.114 4
 1 3 22 1383.24 574.536 4
 -1 -3 22 932.799 445.901 6
 -1 3 24 1615.53 669.237 4
 -1 -3 24 2707.67 905.105 6
 1 3 24 2972.11 972.594 4
 1 4 -23 153.308 275.18 5
 1 -4 -23 468.941 461.34 5
 -1 4 -23 1117.66 718.114 5
 -1 -4 -23 545.31 492.461 5
 -1 -4 -21 2599.01 958.693 5
 1 4 -21 2931.99 1071.11 5
 1 -4 -21 1475.49 778.982 5
 1 4 -21 1965.08 626.47 3
 -1 4 -21 1308.47 727.745 5
 1 4 -19 7447.39 1081.97 3
 -1 4 -19 6901.84 1011.82 3
 1 -4 -19 8007.52 1429.45 5
 1 4 -19 9550.97 1641.76 5
 -1 -4 -19 8702.3 1505.38 5
 -1 4 -19 7693.99 1497.04 5
 -1 4 -17 4041.15 745.376 3
 1 -4 -17 4248.93 891.498 2
 -1 -4 -17 4769.77 1022.98 5
 -1 4 -17 3836.72 947.393 5
 1 4 -17 4191.65 957.619 5
 1 -4 -17 4559.83 999.285 5
 1 4 -17 4458.89 784.223 3
 1 4 -15 6578.38 898.703 3
 -1 -4 -15 7533.81 1121.03 2
 -1 -4 -15 6736.52 1153 5
 -1 4 -15 7685.42 926.571 3
 1 -4 -15 8177.88 1195.1 5
 1 4 -15 7725.97 1237.86 5
 -1 4 -15 7680.18 1258.91 5
 1 -4 -15 7833.47 1112.33 2
 1 4 -13 9643.79 1035.26 3
 -1 -4 -13 10395.6 1232.21 2
 -1 4 -13 9920.93 1329.22 5
 1 4 -13 11927.3 1421.08 5
 1 -4 -13 10352.3 1199.51 2
 -1 -4 -13 12186.3 1407.74 5
 -1 4 -13 10288.7 1021.49 3
 1 -4 -13 9996.29 1260.7 5
 -1 -4 -11 27467.7 1848.78 2
 1 4 -11 25810.2 1917.32 5
 1 -4 -11 25801.2 1794.31 5
 1 4 -11 24407 1532.26 3
 1 -4 -11 24429 1690.67 2
 -1 4 -11 23960.3 1872.55 5
 -1 -4 -11 26231.9 1450.23 1
 -1 4 -11 23255.7 1457.13 3
 -1 -4 -11 24507.6 1762.3 5
 -1 -4 -9 1347.37 439.46 2
 1 -4 -9 1504.63 321.21 1
 1 -4 -9 1687.54 470.865 2
 -1 4 -9 970.273 306.536 3
 -1 4 -9 840.052 294.51 4
 1 4 -9 1406.46 359.476 3
 -1 -4 -9 1912.78 457.999 5
 -1 4 -9 1107.21 378.24 5
 1 4 -9 1142.95 385.95 5
 1 4 -9 899.524 269.714 4
 -1 -4 -9 2250.06 584.4 1
 1 -4 -9 1602.01 357.027 5
 1 4 -7 11366.9 1017.14 5
 -1 -4 -7 10663.8 827.798 1
 1 4 -7 10859.3 899.858 3
 -1 4 -7 10719.7 870.93 4
 -1 -4 -7 11168.7 919.273 5
 1 -4 -7 11069.8 840.808 1
 1 4 -7 11081.6 811.378 4
 1 -4 -7 12046.4 924.224 5
 1 -4 -7 11238.6 972.517 2
 -1 4 -7 11102.2 899.769 3
 -1 4 -7 12006.1 1044.87 5
 -1 -4 -7 12223 1029.61 2
 -1 -4 -5 146059 2759.8 5
 -1 4 -5 143916 2400.88 1
 1 -4 -5 149601 3288.43 2
 1 -4 -5 150263 2951.9 1
 1 4 -5 147630 2382.91 4
 -1 -4 -5 149333 3270.92 2
 -1 4 -5 151000 2741.4 4
 1 4 -5 149226 3212.1 3
 -1 4 -5 151521 3132.27 5
 1 4 -5 153404 3212.84 5
 -1 -4 -5 142688 2856.45 1
 1 -4 -5 143853 2610.8 5
 -1 4 -5 143639 3182.47 3
 -1 4 -3 10578.9 651.947 1
 -1 4 -3 11599.2 815.819 6
 -1 -4 -3 11182 440.804 8
 1 4 -3 11054.4 573.947 4
 -1 -4 -3 11044.9 599.576 5
 1 -4 -3 11176.3 773.783 7
 1 -4 -3 10808.8 748.952 1
 -1 4 -3 11298.6 684.451 5
 -1 -4 -3 11759.7 798.62 1
 1 4 -3 11850.6 780.106 1
 1 -4 -3 11568.5 526.709 5
 1 4 -3 10899.1 876.856 3
 1 4 -3 11451.3 716.331 5
 -1 -4 -3 11531.2 887.235 2
 1 -4 -3 12176.1 960.527 2
 1 4 -3 10449.1 850.903 6
 -1 4 -3 12295.8 740.621 4
 1 4 -1 14479.1 1429.61 6
 -1 4 -1 13222.1 1038.78 6
 1 -4 -1 14047.8 796.45 1
 1 -4 -1 14817.2 692.184 7
 1 4 -1 14594.7 684.043 5
 -1 4 -1 15234.3 796.358 1
 -1 -4 -1 15746.3 888.088 1
 -1 4 -1 14799.3 535.045 5
 -1 -4 -1 17161.9 1308.75 2
 1 -4 -1 14927.4 1482.1 2
 1 4 -1 15272.2 874.156 1
 -1 -4 1 13329.6 607.784 5
 1 -4 1 14273.4 519.442 5
 1 4 1 14490.7 1246.04 2
 1 4 1 15176.7 863.294 1
 1 -4 1 15477.1 1167.39 6
 1 4 1 15029.1 1615.89 6
 -1 4 1 12826.6 1550.09 6
 -1 -4 1 12907.4 1326.96 6
 -1 4 1 14797.6 839.552 1
 -1 -4 1 14284.4 834.646 1
 -1 4 1 15245.6 718.694 7
 1 -4 1 14375.4 762.043 1
 -1 -4 3 10443.4 692.528 5
 -1 -4 3 11713.2 736.346 1
 -1 4 3 10311.4 514.879 5
 -1 4 3 11274.4 894.098 2
 1 -4 3 11114.3 673.619 5
 1 4 3 11056.1 755.941 1
 -1 4 3 11643.3 802.791 7
 -1 -4 3 11611 872.747 6
 1 -4 3 10022.5 603.686 1
 1 4 3 11481.6 844.229 2
 1 -4 3 10686.6 768.718 6
 -1 4 3 10884.5 749.802 1
 1 4 5 143720 2768.96 5
 -1 -4 5 144666 2105.2 4
 -1 -4 5 141270 3063.08 5
 -1 -4 5 149349 3085.02 6
 -1 -4 5 141305 2508.12 1
 1 4 5 134334 1352.86 8
 1 4 5 146652 3132.33 2
 1 -4 5 140361 2981.72 5
 -1 -4 5 145338 2345.16 7
 -1 4 5 142137 2580.06 5
 -1 4 5 150511 3412.91 7
 1 -4 5 134417 2031.88 1
 1 4 5 140182 2852.54 1
 -1 4 5 152436 3198.69 2
 1 -4 5 150632 2998.61 6
 1 -4 5 145188 2474.12 4
 -1 4 5 151116 2945.5 1
 -1 -4 5 144651 3179.77 3
 1 -4 7 12034.2 968.204 3
 -1 4 7 12162.8 859.563 3
 -1 4 7 11959.7 915.281 5
 1 4 7 12438.5 825.268 3
 1 4 7 11611.1 863.722 1
 -1 4 7 11644.9 460.492 8
 -1 4 7 11761.7 875.545 1
 -1 -4 7 13554.8 752.237 1
 1 -4 7 12832.2 822.559 4
 -1 -4 7 12721.5 974.847 6
 1 4 7 12238.5 950.681 5
 1 4 7 13112.5 559.736 8
 1 -4 7 13044.9 972.526 6
 1 -4 7 11388.9 532.883 1
 1 4 7 12967 1212.03 4
 -1 -4 7 12545.1 973.81 3
 -1 -4 7 12865.7 880.293 7
 -1 -4 7 11848.7 726.013 4
 -1 -4 9 1254.05 278.137 4
 -1 -4 9 1120.98 214.192 1
 -1 4 9 1236.35 291.883 3
 -1 -4 9 1078.98 329.956 6
 1 -4 9 1269.76 324.64 4
 -1 -4 9 1062.29 284.625 7
 1 4 9 1676.09 504.596 3
 1 4 9 2858.48 495.623 8
 1 4 9 714.591 265.979 4
 1 -4 9 1209.07 322.744 3
 -1 4 9 1079.77 190.585 8
 1 -4 9 968.266 127.851 1
 -1 4 9 1134.97 295.253 1
 1 4 9 1004.72 304.793 1
 1 4 11 29626.9 1216.78 8
 1 4 11 25017.7 1375.75 1
 1 -4 11 27126.6 1512.27 4
 -1 4 11 24247.6 1955.25 4
 -1 -4 11 26645 1674.12 6
 -1 4 11 23045.6 1342.4 1
 -1 -4 11 24518.9 924.241 1
 -1 4 11 24289.9 1056.34 8
 -1 -4 11 27366.5 1445.75 4
 1 4 11 26245.7 2069.95 4
 -1 -4 13 10736.5 1002.95 4
 1 4 13 10900.3 1415.82 4
 -1 -4 13 9371.16 442.219 1
 1 4 13 10741.8 941.604 1
 -1 -4 13 10507.6 1130.37 6
 -1 4 13 10216.5 781.227 8
 1 -4 13 10527.3 1038.49 4
 -1 -4 13 8472.82 438.462 1
 -1 4 13 10957.7 1400.72 4
 1 4 13 10667.7 817.834 8
 -1 4 13 9070.91 888.566 1
 -1 4 15 6502.48 785.817 1
 1 4 15 5983.08 716.833 1
 -1 -4 15 7563.25 1020.95 6
 -1 4 15 7725.92 1259 4
 -1 -4 15 8379.69 966.003 4
 1 4 15 9026.03 1343.49 4
 1 -4 15 8351.04 999.534 4
 -1 4 17 3549.92 884.784 4
 1 4 17 5021.36 1045.74 4
 -1 -4 17 4162.41 821.461 6
 1 -4 17 4777.88 901.131 6
 -1 -4 17 4456.18 753.234 4
 1 -4 17 4505.23 789.735 4
 1 -4 19 8413.34 1304.05 6
 -1 -4 19 7871.3 1084.9 4
 -1 4 19 6864.29 1307.85 4
 1 4 19 7089.9 1347.99 4
 -1 -4 19 8312.28 1287.8 6
 1 -4 19 7805.14 1137.32 4
 1 -4 21 1776.71 703.419 6
 1 -4 21 2421.94 648.646 4
 -1 4 21 1829.68 713.528 4
 1 4 21 1631.48 491.205 4
 -1 -4 21 3324.53 852.275 6
 -1 -4 21 2586.85 648.637 4
 -1 4 23 198.936 403.43 4
 -1 -4 23 478.625 495.028 6
 1 -4 23 914.976 518.675 6
 1 4 23 659.495 519.914 4
 -1 4 25 372.353 312.195 4
 1 5 -22 6499.01 1513.33 5
 -1 5 -22 8058.44 1738.06 5
 1 -5 -22 9962.71 1804.84 5
 -1 -5 -22 7573.82 1538 5
 1 -5 -20 9554.8 1679.71 5
 1 5 -20 7618.7 1578.31 5
 1 5 -20 7014.63 1147.87 3
 -1 5 -20 8087.71 1165.02 3
 -1 5 -20 6036.29 1342.28 5
 -1 -5 -20 7924.03 1507.53 5
 -1 5 -18 26084.3 2643.63 5
 1 -5 -18 27451.6 2399.69 2
 -1 -5 -18 26078.1 2555.41 5
 -1 5 -18 25033.1 1918.59 3
 1 5 -18 25263.2 2578.83 5
 1 5 -18 24623 1992.96 3
 1 -5 -18 22633.8 2348.12 5
 -1 -5 -18 25009.3 2347.93 2
 1 -5 -16 1766.96 565.931 2
 -1 -5 -16 1499.15 550.595 5
 -1 5 -16 752.037 309.757 3
 1 5 -16 1161.23 357.919 3
 1 5 -16 1844.53 630.211 5
 -1 5 -16 925.564 307.443 5
 1 -5 -16 1320.1 524.629 5
 -1 -5 -16 1194.96 449.134 2
 1 5 -14 570.04 333.453 3
 -1 -5 -14 381.128 315.437 5
 1 -5 -14 1012.79 479.449 5
 1 -5 -14 784.997 398.213 2
 -1 5 -14 302.041 190.118 3
 -1 5 -14 220.927 197.114 5
 -1 -5 -14 632.516 399.319 2
 1 5 -12 7264.28 930.506 3
 1 -5 -12 8171.54 1081.64 5
 -1 -5 -12 7417.01 1066.83 5
 1 -5 -12 7236.85 994.871 2
 -1 -5 -12 7225.63 1042.57 2
 -1 5 -12 5848.2 963.744 5
 -1 -5 -12 5817.98 725.606 1
 -1 5 -12 7360.33 887.161 3
 1 -5 -10 8525.12 857.696 1
 -1 5 -10 9058.84 1087.36 5
 1 -5 -10 8748.39 1022.03 2
 1 -5 -10 8861.08 984.303 5
 -1 -5 -10 9155.7 883.49 1
 -1 -5 -10 9752.56 1052.16 5
 -1 5 -10 8801.85 921.859 3
 1 5 -10 11061.4 1019.2 4
 1 5 -10 10250.1 1023.08 3
 -1 -5 -10 8710.73 1045.9 2
 1 5 -8 1337.58 313.659 4
 -1 -5 -8 591.522 221.696 1
 1 -5 -8 958.986 315.122 5
 1 5 -8 2067.08 501.481 5
 -1 5 -8 942.385 295.578 4
 -1 -5 -8 1006.09 338.24 2
 1 5 -8 1293.71 374.101 3
 -1 5 -8 873.095 316.425 5
 -1 -5 -8 858.28 280.632 5
 1 -5 -8 909.386 262.714 1
 -1 5 -8 780.554 256.023 3
 1 -5 -8 1077.37 324.968 2
 -1 -5 -6 19325.6 1105.27 5
 -1 -5 -6 19761.1 1187.21 1
 -1 -5 -6 20117.1 1367.02 2
 1 5 -6 20554.6 1009.96 4
 -1 5 -6 18857.6 1002.44 1
 1 5 -6 21880.8 1350.39 5
 -1 5 -6 20864.1 1128.31 4
 1 -5 -6 20713.5 1384.81 2
 1 -5 -6 19835.4 1070.92 5
 -1 5 -6 20414.9 1275.74 5
 -1 5 -6 19706 1330.84 3
 1 5 -6 20512.1 1354.1 3
 1 -5 -6 19950.9 1199.56 1
 1 5 -4 46713 1682.14 5
 -1 5 -4 34897.7 1391.23 5
 -1 5 -4 32449.7 1722.91 3
 1 -5 -4 34538.9 1798.17 2
 -1 -5 -4 32095.2 762.404 8
 -1 -5 -4 35586.9 1796.82 2
 1 5 -4 36651.8 1201 4
 -1 5 -4 34007.8 1369.8 4
 -1 -5 -4 35389.1 1206.69 5
 -1 5 -4 32151.4 1301.51 1
 1 5 -4 44220.1 1921.43 6
 -1 5 -4 32383.8 1566.63 6
 1 5 -4 38516.3 1629.07 1
 -1 -5 -4 32754.8 1473.45 1
 1 -5 -4 33117 1059.19 5
 1 5 -4 32064.7 1713.06 3
 1 -5 -4 34687 1500.82 1
 1 -5 -2 74504.8 1864.43 7
 1 5 -2 69995.8 2882.11 6
 -1 5 -2 72320 1552.23 5
 1 5 -2 72930.6 2170.73 1
 -1 5 -2 72472.6 1939.2 1
 -1 5 -2 66987.2 2383.37 6
 -1 -5 -2 74031.3 2152.11 1
 1 -5 -2 70142.2 2031.46 1
 -1 -5 -2 62433.5 2551.85 2
 1 -5 -2 65185.2 2960.13 2
 1 5 -2 70979.3 1705.89 5
 1 -5 0 110.75 90.7473 1
 -1 5 0 60.201 135.55 1
 1 5 0 252.841 493.447 6
 -1 -5 0 380.799 172.111 1
 -1 5 0 110.395 73.8474 7
 1 -5 0 404.866 582.97 6
 -1 5 0 195.739 249.376 6
 -1 -5 0 101.231 98.593 5
 -1 -5 0 721.888 634.325 6
 1 5 0 202.502 179.236 1
 1 -5 0 157.141 80.0673 7
 1 5 0 133.707 67.2701 7
 -1 5 2 74511.5 1925.47 7
 1 5 2 72081.1 2123.01 1
 1 -5 2 69801 1495.03 5
 -1 -5 2 71314.1 1664.72 5
 -1 5 2 76487.2 2138.9 1
 1 -5 2 70288.7 2502.12 6
 1 5 2 67759.5 2633.63 2
 -1 -5 2 68918.4 2874.57 6
 -1 5 2 72889.4 3081.94 2
 1 -5 2 70401.8 1852.16 1
 -1 -5 2 74953.5 2083.24 1
 -1 -5 4 36663.5 1566.63 5
 -1 5 4 36390 1752.28 2
 -1 -5 4 36832 921.112 7
 1 -5 4 32032 1193.59 1
 -1 -5 4 39005.6 1489.05 1
 -1 -5 4 42008.9 1861.77 6
 1 -5 4 31962.8 1315.79 5
 -1 5 4 35076.9 1588.24 7
 1 5 4 37313.3 1691.47 2
 1 -5 4 36930.8 1603.31 6
 1 5 4 34599.1 1613.11 7
 1 5 4 32918.8 1478.54 1
 -1 5 4 33430.6 1067.51 5
 -1 5 4 33867.1 1488.01 1
 -1 -5 6 18581.1 849.262 4
 -1 5 6 20139.9 1313.61 2
 -1 -5 6 18937.4 1231.2 5
 1 -5 6 17735.6 834.995 1
 1 5 6 17113.7 1110.46 1
 -1 -5 6 19351 1008.01 1
 -1 -5 6 20708.5 1283.39 6
 -1 -5 6 19435.7 1300.99 3
 1 5 6 19742.6 1114.2 5
 1 -5 6 18368.1 1191.88 5
 -1 5 6 18460.3 1340.17 7
 1 5 6 19632.2 1367.14 7
 1 -5 6 19185.4 979.74 4
 -1 5 6 18552.8 1018.74 5
 -1 5 6 18739.6 1156.78 1
 1 5 6 19185.8 526.655 8
 1 -5 6 17921.2 1158.19 6
 -1 -5 6 20253.8 942.681 7
 1 5 8 1145.71 157.399 8
 -1 5 8 1255.06 316.172 3
 1 -5 8 1166.12 340.194 6
 1 -5 8 1294.35 298.901 4
 1 5 8 1370.16 471.045 4
 -1 -5 8 1715.78 337.255 7
 1 5 8 1117.32 300.176 1
 -1 -5 8 1457.51 363.577 6
 1 -5 8 1118.09 187.673 1
 -1 5 8 1324.06 135.385 8
 -1 -5 8 1369.93 265.69 4
 -1 5 8 1104.49 310.347 5
 1 5 8 854.395 266.773 5
 -1 5 8 1363.46 336.876 1
 -1 -5 8 1531.47 272.504 1
 -1 -5 10 12466.5 907.388 4
 1 -5 10 9863.32 1005.44 6
 1 5 10 8517.39 854.933 1
 -1 -5 10 16099.5 1326.02 6
 -1 -5 10 13218.1 774.093 1
 1 -5 10 9145.26 825.522 4
 1 5 10 8424.88 522.281 8
 -1 5 10 9221.58 917.5 1
 1 -5 10 7532.56 426.308 1
 -1 5 10 8763.36 488.786 8
 1 5 10 9664.36 1249.59 4
 -1 -5 12 9014.15 572.707 1
 1 5 12 7252.93 816.569 1
 -1 -5 12 11498.4 1187.99 6
 1 5 12 7417.98 1149.1 4
 -1 5 12 8186.1 1212.55 4
 1 -5 12 8470.53 881.338 4
 -1 5 12 8381.15 910.407 1
 1 5 12 7893.33 586.334 8
 1 -5 12 8549.83 1016.65 6
 -1 -5 12 9191.57 864.119 4
 -1 5 12 8291.79 576.996 8
 1 -5 14 489.677 244.262 6
 1 -5 14 473.914 223.866 4
 -1 -5 14 1373.24 442.817 6
 -1 5 14 77.4881 220.645 4
 -1 5 14 578.167 355.378 1
 1 5 14 261.322 331.463 4
 1 5 14 319.826 200.007 1
 -1 -5 14 678.551 258.869 4
 -1 5 16 1258.52 396.819 1
 1 5 16 857.053 300.009 1
 -1 5 16 1382.75 580.302 4
 1 5 16 1179.44 484.748 4
 -1 -5 16 1120.82 349.686 4
 1 -5 16 1327.93 317.425 4
 1 -5 16 1421.44 479.561 6
 -1 -5 16 1236.5 446.837 6
 1 -5 18 24877.7 2145.28 6
 1 -5 18 25035.1 1899.28 4
 1 5 18 19874.7 2273.8 4
 -1 -5 18 25657.1 2182.15 6
 -1 -5 18 23921 1775.69 4
 -1 5 18 21254.7 2380.81 4
 -1 -5 20 8324.44 1338.13 6
 -1 -5 20 8279.5 1140.42 4
 -1 5 20 7626.49 1479.03 4
 1 5 20 7059.54 1394.72 4
 1 -5 20 7235.1 1266.01 6
 1 -5 20 8457.42 1192.44 4
 1 5 22 6646.39 1401.58 4
 -1 -5 22 9051.53 1486.55 6
 -1 5 22 7242.38 1459.33 4
 1 -5 22 9574.94 1526.47 6
 -1 5 24 1044.46 572.876 4
 1 5 24 611.041 539.075 4
 1 -6 -23 119.281 279.172 5
 -1 -6 -23 1655.85 843.839 5
 1 -6 -21 7684.24 1496.65 5
 -1 -6 -21 6932.46 1461.16 5
 1 6 -21 5371.47 1059.59 3
 1 6 -21 7012.33 1482.17 5
 -1 6 -21 6679.62 1519.15 5
 -1 -6 -19 10419.8 1665.6 5
 1 -6 -19 12008.1 1742.44 5
 1 -6 -19 10187.4 1590.77 2
 1 6 -19 10909.9 1405.34 3
 -1 6 -19 11573.6 1399.86 3
 -1 6 -19 10466.3 1763.33 5
 -1 -6 -19 11511.3 1682.51 2
 1 6 -19 10335.6 1771.1 5
 1 -6 -17 8400.68 1312.77 2
 -1 6 -17 8597.76 1132.12 3
 1 -6 -17 8745.07 1365.87 5
 -1 -6 -17 6974.15 1244.13 5
 -1 6 -17 7537.95 1370.5 5
 -1 -6 -17 8189.9 1324.03 2
 1 6 -17 8323.56 1471.86 5
 1 6 -17 7150.02 1100.38 3
 1 -6 -15 18834 1869.09 2
 1 6 -15 19465.4 2057.95 5
 -1 6 -15 20424.8 1659.37 3
 -1 6 -15 19844.4 2032.7 5
 -1 -6 -15 18680.8 1887.41 2
 -1 -6 -15 20414.5 1963.14 5
 1 -6 -15 18538.2 1838.76 5
 1 6 -15 21041.5 1754.99 3
 -1 6 -13 1871.16 541.577 5
 -1 -6 -13 1980.67 607.815 2
 1 6 -13 1736.32 526.787 3
 -1 -6 -13 1643.57 496.332 5
 -1 6 -13 1790.78 495.249 3
 1 -6 -13 1489.39 507.961 5
 1 -6 -13 1995.7 597.87 2
 1 6 -13 2224.77 647.48 5
 1 -6 -11 770.988 335.96 5
 1 -6 -11 1055.04 355.466 2
 1 6 -11 1170.84 365.872 3
 1 6 -11 934.902 320.284 4
 -1 -6 -11 554.221 244.026 2
 -1 6 -11 946.039 407.011 5
 -1 -6 -11 1026.2 393.218 5
 -1 6 -11 1083.37 319.127 3
 1 6 -11 576.544 359.227 5
 -1 6 -9 3057.23 661.895 5
 1 -6 -9 3073.23 522.336 5
 -1 6 -9 3065.44 539.18 4
 1 6 -9 2540.76 499.551 3
 1 6 -9 2872.24 478.316 4
 -1 6 -9 2737.12 543.98 3
 1 -6 -9 3015.81 592.112 2
 -1 -6 -9 3283.91 557.108 5
 1 6 -9 3090.95 622.958 5
 -1 -6 -9 3306.49 645.865 2
 1 6 -7 2631.83 404.059 4
 1 -6 -7 3052.57 585.701 2
 -1 6 -7 2749.77 564.534 5
 -1 -6 -7 2442.9 428.265 5
 -1 6 -7 2754.61 454.405 4
 -1 6 -7 2303.16 372.957 1
 -1 -6 -7 2302.32 438.656 1
 -1 6 -7 3125.39 573.929 3
 1 6 -7 2818.7 576.803 3
 1 6 -7 2848.57 535.002 5
 -1 -6 -7 2821.63 557.516 2
 1 -6 -7 3009.52 516.582 1
 1 -6 -7 2589.2 425.173 5
 -1 6 -5 5636.25 608.57 1
 -1 -6 -5 6220.18 835.208 2
 1 6 -5 6583.73 854.422 3
 1 6 -5 6998.77 738.917 1
 -1 6 -5 6851.8 668.804 4
 -1 6 -5 6287.84 665.411 5
 -1 -6 -5 5739.2 691.9 1
 1 -6 -5 6811.89 540.318 5
 1 -6 -5 6110.88 693.069 1
 -1 6 -5 5378.26 768.955 3
 -1 -6 -5 6087.92 333.87 8
 -1 -6 -5 5611.19 540.347 5
 1 6 -5 7108.29 730.169 5
 1 6 -5 6799.09 573.54 4
 1 -6 -5 6367.05 859.574 2
 1 6 -3 80019.9 2451.84 1
 1 6 -3 75789.3 2018.98 5
 -1 6 -3 69343.3 2434.99 4
 -1 -6 -3 66671.5 2811.06 2
 1 6 -3 69888.3 2885.47 6
 1 -6 -3 75631.1 2348.85 1
 -1 -6 -3 74916.8 2395.8 1
 1 -6 -3 64736.1 3015.66 2
 -1 6 -3 68055.8 2550.22 6
 1 -6 -3 69864.2 1184.13 5
 1 6 -3 71731.3 2752.35 3
 -1 -6 -3 71908.3 1551.01 5
 -1 6 -3 73313.6 2182.13 1
 -1 6 -3 75400.3 1881.98 5
 -1 6 -1 153970 3161.67 1
 1 -6 -1 146568 3134.09 1
 -1 -6 -1 154841 3360.96 1
 1 -6 -1 149010 2474.62 7
 -1 6 -1 143474 4703.86 6
 1 6 -1 154408 5946.4 6
 -1 6 -1 161197 2911.54 7
 1 6 -1 156090 3386.21 1
 -1 -6 -1 164718 5307.75 2
 -1 6 -1 147712 1909.12 5
 1 -6 1 150429 1759.43 7
 -1 -6 1 147269 5714.7 6
 -1 6 1 150661 3241.22 1
 -1 6 1 152897 6485.01 6
 1 -6 1 146252 1829.96 5
 -1 -6 1 150743 3241.02 1
 -1 6 1 153234 2619.27 7
 1 6 1 154024 3350.82 1
 1 -6 1 151887 5091.29 6
 1 -6 1 142947 2987.94 1
 1 6 1 152454 2477.72 7
 -1 -6 1 147791 2201.89 5
 1 6 3 75951.5 2412.66 1
 1 -6 3 72459.3 1821.02 5
 1 -6 3 80934 2790.13 6
 1 6 3 80802.3 2286.08 7
 -1 -6 3 78879.6 2303.86 1
 -1 6 3 72771.4 3070.88 2
 -1 -6 3 75052.6 1957.77 5
 -1 6 3 80762.9 2303.02 7
 -1 6 3 80477.3 2441.8 1
 1 6 3 81405.8 2979.37 2
 1 -6 3 73765.4 2057.85 1
 -1 -6 3 75261.9 2981.43 6
 1 -6 5 5704.77 628.743 5
 -1 6 5 6300 749.389 7
 -1 -6 5 5942.68 654.049 5
 1 6 5 5525.34 685.567 1
 -1 -6 5 5377.05 388.984 7
 -1 6 5 5197.3 662.867 1
 -1 6 5 5521.33 495.211 5
 -1 -6 5 5895.51 769.269 6
 1 -6 5 4875.9 643.377 6
 1 6 5 4809.62 654.872 7
 1 -6 5 5053.32 521.822 1
 -1 -6 5 5131.74 574.013 1
 -1 6 5 5598.85 741.294 2
 1 6 7 1896.53 431.988 1
 -1 6 7 1633.63 394.933 1
 -1 -6 7 1621.81 285.127 4
 -1 -6 7 2185.66 359.64 1
 -1 -6 7 1890.67 435.31 6
 -1 -6 7 1969.92 315.725 7
 1 -6 7 1603.5 334.653 4
 1 -6 7 1800.35 288.965 1
 1 -6 7 2304.26 454.2 6
 -1 6 7 2146.39 373.368 5
 -1 -6 9 3247.59 594.756 6
 -1 -6 9 2936.04 407.494 1
 -1 6 9 3155.08 546.679 1
 1 -6 9 3429.36 367.255 1
 -1 -6 9 3656.21 449.549 4
 1 6 9 3224.22 550.733 1
 -1 -6 9 2771.89 445.866 7
 1 -6 9 3292.22 501.698 7
 1 -6 9 3617.06 525.54 4
 1 6 9 2827.4 236.445 8
 1 -6 9 3321.21 596.371 6
 1 6 9 2583.19 655.691 4
 -1 6 11 615.31 329.789 4
 -1 6 11 683.312 116.848 8
 -1 -6 11 671.699 262.854 4
 1 -6 11 687.917 237.006 4
 1 6 11 1154.74 429.621 4
 -1 -6 11 920.882 212.633 1
 1 6 11 871.557 161.569 8
 -1 -6 11 662.32 289.948 6
 1 6 11 798.543 305.264 1
 -1 6 11 377.907 197.246 1
 1 -6 11 997.595 170.589 1
 1 -6 11 878.742 329.465 6
 1 6 13 1324.03 482.165 4
 1 6 13 1838.98 261.443 8
 -1 -6 13 1924.08 405.793 4
 -1 6 13 2217.24 682.839 4
 -1 6 13 2037.5 490.734 1
 -1 6 13 1623.29 229.079 8
 1 -6 13 1961.38 472.047 4
 -1 -6 13 1490.8 234.673 1
 -1 -6 13 2117.4 551.512 6
 1 -6 13 1652.44 482.219 6
 1 6 13 1530.81 418.511 1
 1 -6 15 21896 1571.56 4
 -1 6 15 21100.8 1565.62 1
 1 6 15 19385.5 1499.15 1
 1 6 15 20768.7 2193.64 4
 -1 -6 15 21256.8 1479.82 4
 -1 -6 15 21868.1 1865.85 6
 -1 6 15 21258.1 2229.12 4
 1 -6 15 20746.7 1800.97 6
 1 6 17 7314.41 1408.55 4
 1 -6 17 9196.34 1123.72 4
 -1 6 17 6688.05 1387.81 4
 -1 6 17 3512.56 667.282 1
 -1 -6 17 7530.83 948.072 4
 1 -6 17 7373.73 1154.75 6
 -1 -6 17 8372.4 1194.79 6
 -1 6 19 10200.1 1722.68 4
 1 -6 19 11253.1 1325.72 4
 1 -6 19 10658.9 1492.64 6
 -1 -6 19 7880.69 1052.91 4
 1 6 19 10258 1713.64 4
 -1 -6 19 11612.3 1552.33 6
 1 6 21 6360.41 1442.85 4
 1 -6 21 6700.26 1293.24 6
 -1 6 21 7433.42 1561.94 4
 -1 -6 21 5694.42 1142.66 6
 1 -6 23 669.092 405.367 6
 1 6 23 224.694 209.622 4
 -1 6 23 791.486 265.366 4
 -1 -6 23 1037.35 493.489 6
 1 -7 -24 20.775 458.728 5
 1 7 -22 3226.29 1092.77 5
 -1 7 -22 4681.09 1331.36 5
 1 -7 -22 3149.14 997.665 5
 -1 -7 -22 2414.75 833.154 5
 -1 -7 -20 1491.33 645.013 2
 1 7 -20 1322.44 619.476 5
 1 -7 -20 1654.58 640.48 2
 -1 7 -20 1286.7 786.995 5
 -1 7 -20 1237.29 428.48 3
 -1 -7 -20 1349.46 593.588 5
 1 7 -20 873.493 384.533 3
 1 -7 -20 962.081 494.12 5
 -1 -7 -18 11059 1645.25 2
 -1 7 -18 9634.21 1262.39 3
 -1 7 -18 10954.9 1704.31 5
 1 -7 -18 10303.1 1574.05 2
 1 7 -18 9178.95 1311.88 3
 1 7 -18 10860.2 1673.93 5
 1 -7 -18 10182.4 1523.45 5
 -1 -7 -18 9528.49 1514.06 5
 -1 -7 -16 7723.15 1272.58 5
 -1 7 -16 5619.59 947.877 3
 1 -7 -16 5650.62 1097.98 2
 -1 -7 -16 7528.04 1290.63 2
 1 -7 -16 7916.29 1208.92 5
 1 7 -16 7129.24 1269.23 5
 -1 7 -16 5863.5 1196.79 5
 1 7 -16 5558.25 959.386 3
 -1 7 -14 22416.6 1795.64 3
 1 -7 -14 23058.5 1960.76 5
 -1 -7 -14 23099 2113.74 2
 1 -7 -14 22012.5 1999.72 2
 -1 7 -14 25489.4 2235.03 5
 -1 -7 -14 23622 2011.13 5
 1 7 -14 20886.3 1816.54 3
 1 7 -14 24128.7 2188.49 5
 -1 7 -12 201.764 142.562 3
 -1 -7 -12 489.12 337.443 5
 -1 7 -12 378.775 284.332 5
 1 -7 -12 305.227 236.201 2
 1 7 -12 129.539 143.669 5
 1 -7 -12 266.793 235.076 5
 -1 -7 -12 727.303 354.791 2
 1 7 -12 235.35 286.811 3
 -1 7 -10 7037.97 944.906 3
 1 -7 -10 6876.22 833.728 5
 1 -7 -10 6213.16 969.125 2
 1 7 -10 6926.04 972.322 5
 1 7 -10 6383.8 789.9 4
 1 7 -10 6593.16 922.678 3
 -1 -7 -10 6683.38 977.919 2
 -1 7 -10 6368.65 929.789 5
 -1 -7 -10 7064.32 892.475 5
 -1 7 -8 2142.8 493.404 5
 1 -7 -8 2323.77 464.928 5
 -1 -7 -8 1763.47 466.029 5
 1 7 -8 2512.96 546.336 5
 -1 -7 -8 1600.55 467.274 2
 -1 7 -8 2167.55 428.742 4
 -1 7 -8 1471.41 442.034 3
 1 7 -8 1493.01 436.546 3
 1 7 -8 2022.36 391.971 4
 1 -7 -8 1851.64 537.957 2
 1 -7 -6 21565.2 1071.42 5
 -1 -7 -6 24420.9 1241.03 5
 1 -7 -6 22659.5 1769.96 2
 -1 7 -6 21354 1282.89 4
 1 7 -6 21332.5 1114.37 4
 -1 7 -6 21324.7 1674.66 3
 -1 7 -6 22032.2 1328.13 1
 -1 -7 -6 22506.3 1724.27 2
 -1 7 -6 21747.3 1353.82 5
 1 7 -6 19194.6 1535.2 3
 1 7 -6 22613.5 1412.7 5
 1 -7 -4 4212.76 602.189 1
 1 7 -4 4064.64 607.783 1
 -1 7 -4 4336.49 614.214 4
 -1 7 -4 3982.28 505.817 5
 1 -7 -4 4417.58 833.758 2
 1 7 -4 4457.69 553.058 5
 1 -7 -4 3985.93 343.219 5
 -1 7 -4 4248.92 579.282 1
 -1 -7 -4 4650.8 796.68 2
 -1 -7 -4 4054.01 425.564 5
 1 7 -4 3665.68 667.187 3
 -1 -7 -4 3563.72 373.82 8
 1 7 -4 3860.83 525.402 4
 -1 -7 -4 4192.22 628.339 1
 1 -7 -2 120498 2583.47 7
 -1 -7 -2 126662 4695.46 2
 -1 7 -2 121245 3051.17 1
 1 -7 -2 135867 5372.56 2
 1 -7 -2 121287 3125.79 1
 1 7 -2 122130 3261.2 1
 -1 7 -2 116730 2130.43 5
 1 7 -2 118351 2473.92 5
 -1 -7 -2 120053 3225.59 1
 -1 7 -2 124874 4238.61 6
 1 7 -2 123407 4899.36 6
 1 7 0 24648.1 1472.09 1
 -1 7 0 24089.7 1383.45 1
 -1 -7 0 23162.6 1389.97 1
 1 7 0 22357.5 856.712 7
 -1 7 0 24794.5 1027.92 7
 1 -7 0 29354.2 3106.95 6
 -1 -7 0 29482 3305.52 6
 -1 7 0 23922.5 2571.04 6
 1 -7 0 22526.5 1308.93 1
 1 7 0 25366.3 2988.23 6
 1 -7 0 24042.7 900.419 7
 -1 -7 0 23245.6 842.608 5
 -1 -7 2 119084 3079.86 1
 -1 7 2 117569 2671.62 7
 -1 -7 2 114355 2259.89 5
 -1 7 2 116585 3147.57 1
 1 -7 2 116305 2863.4 1
 1 7 2 119659 3249.99 1
 1 7 2 129906 4791.81 2
 -1 7 2 132800 5906.57 6
 1 7 2 117081 5386.19 6
 1 -7 2 113244 2023.45 5
 -1 -7 2 111339 4608.88 6
 1 -7 2 117705 4288.35 6
 1 7 2 116422 2593.02 7
 -1 7 4 3477.33 572.516 1
 -1 -7 4 4110.97 741.233 6
 1 7 4 4149.46 633.772 1
 1 -7 4 3123.13 455.84 1
 1 -7 4 3859.16 478.608 5
 -1 -7 4 3555.96 472.61 5
 -1 7 4 3263.43 533.195 7
 1 7 4 3523.01 551.234 7
 1 -7 4 3434.03 629.271 6
 -1 -7 4 3437.23 516.715 1
 1 -7 6 21838 1158.03 1
 1 -7 6 23587 1549.9 6
 -1 -7 6 21812.8 1368.55 5
 1 7 6 26338.5 1592.07 1
 -1 7 6 22789.1 1103.28 5
 -1 -7 6 24830.5 1334.81 1
 -1 -7 6 27922.8 1757.16 6
 1 -7 6 22753.6 1363.14 5
 -1 7 6 22865 1485.5 1
 -1 -7 6 24383.4 907.324 7
 1 -7 8 2142.23 404.58 4
 1 7 8 1818.12 546.638 1
 -1 -7 8 1716.28 423.88 6
 -1 -7 8 2094.57 347.011 7
 1 -7 8 2094.21 345.255 7
 -1 -7 8 2093.43 376.867 1
 1 -7 8 2540.23 520.117 6
 -1 -7 8 1719.59 322.823 4
 1 -7 8 1629.89 305.648 1
 -1 7 8 1884.26 391.187 5
 -1 7 8 1558.98 383.034 1
 1 -7 10 6254.54 530.424 1
 -1 -7 10 6659.92 656.548 4
 1 -7 10 5754 683.155 7
 -1 -7 10 6935.52 654.887 1
 -1 -7 10 7580.44 936.12 6
 1 -7 10 6861.3 919.898 6
 1 7 10 6585.35 1091.78 4
 -1 -7 10 5932.89 678.55 7
 -1 7 10 6239.7 819.303 1
 1 7 10 5660.88 790.152 1
 1 -7 10 6682.08 706.334 4
 -1 7 12 -91.152 312.19 4
 -1 -7 12 33.4173 146.994 6
 1 -7 12 373.671 300.421 6
 -1 -7 12 275.415 132.148 1
 1 -7 12 544.934 263.688 4
 1 7 12 179.582 296.743 4
 1 -7 12 186.939 84.8026 1
 1 7 12 357.884 369.818 1
 1 7 12 187.397 66.8193 8
 -1 -7 12 230.416 114.637 4
 -1 7 12 480.501 341.127 1
 -1 -7 14 21332.9 1806.05 6
 1 7 14 21842.4 1694.47 1
 1 -7 14 23904.6 1901.07 6
 -1 -7 14 25163 1535.89 4
 -1 7 14 20134.2 1582.01 1
 1 7 14 25044.4 2422.8 4
 1 -7 14 21379.8 1508.26 4
 -1 7 14 21230.7 2218.76 4
 -1 7 16 4763.08 788.914 1
 1 7 16 6635.56 1331.87 4
 1 -7 16 5688.17 1012.53 6
 1 -7 16 7034.27 929.381 4
 1 7 16 4681.42 805.872 1
 -1 -7 16 6823.11 870.748 4
 -1 7 16 6149.85 1298.54 4
 -1 -7 16 5885.06 1017.13 6
 -1 -7 18 5558.63 840.846 4
 -1 7 18 9085.74 1634.92 4
 -1 -7 18 9545.34 1365.19 6
 1 -7 18 6972.95 971.516 4
 1 7 18 10892.9 1782.9 4
 1 -7 18 9129.49 1365.68 6
 -1 7 20 1567.95 736.809 4
 -1 -7 20 2108.33 662.624 6
 1 7 20 1273.45 737.976 4
 1 -7 20 1155.61 502.465 6
 -1 -7 22 2843.79 897.884 6
 1 7 22 2364.55 966.516 4
 -1 7 22 3123.63 1134.24 4
 1 -7 22 3104.37 890.961 6
 -1 -8 -23 398.017 532.846 5
 1 -8 -23 777.958 497.587 5
 -1 -8 -21 -20.0291 379.171 2
 -1 8 -21 782.54 683.57 5
 1 -8 -21 1003.81 604.92 5
 -1 -8 -21 259.947 318.845 5
 1 8 -21 284.53 516.199 5
 1 -8 -21 529.706 346.634 2
 1 8 -21 454.858 355.543 3
 1 -8 -19 54.2211 207.123 5
 1 8 -19 -284.617 286.667 5
 -1 8 -19 -296.609 479.707 3
 -1 -8 -19 -83.3213 186.359 2
 -1 -8 -19 -275.003 445.392 5
 1 -8 -19 185.35 275.039 2
 1 8 -19 471.087 289.846 3
 -1 8 -19 -6.03319 294.392 5
 -1 -8 -17 7104.71 1321.84 5
 1 -8 -17 6029.83 1151.34 5
 -1 -8 -17 7139 1307.94 2
 1 -8 -17 8334.51 1404.01 2
 1 8 -17 6114.45 1301.37 5
 -1 8 -17 6557.07 1055.64 3
 1 8 -17 6038.68 1040.31 3
 -1 8 -17 5911.93 1187.58 5
 -1 -8 -15 19418.6 1873.22 5
 -1 -8 -15 17485.9 1945.11 2
 1 -8 -15 18293.9 1952.55 2
 1 8 -15 19441.9 2050.02 5
 1 8 -15 18562.2 1801.94 3
 1 -8 -15 20858.3 1933.8 5
 -1 8 -15 18831.7 1785.1 3
 -1 8 -15 22547.4 2224.82 5
 -1 -8 -13 15995.6 1758.74 2
 -1 -8 -13 16184.2 1566.37 5
 1 -8 -13 15663.6 1518.48 5
 1 8 -13 16691.1 1646.12 3
 1 8 -13 15206.3 1682.79 5
 1 -8 -13 16603.9 1789.33 2
 -1 8 -13 19846.8 1922.21 5
 -1 8 -13 17304.7 1653.04 3
 1 -8 -11 8866.57 1019.09 5
 1 8 -11 6884.48 876.729 4
 1 8 -11 9722.4 1243.54 5
 -1 8 -11 9549.39 1189.24 3
 -1 -8 -11 8879.89 1055.99 5
 -1 8 -11 9786.64 1216.45 5
 1 -8 -11 9255.24 1266.11 2
 1 8 -11 7500.07 1068.89 3
 -1 -8 -11 7653.96 1133.31 2
 -1 -8 -9 23332.4 1475.03 5
 -1 -8 -9 21664.3 1841.89 2
 1 -8 -9 22173.9 1406.37 5
 -1 8 -9 23545.7 1707.59 5
 1 8 -9 22315.2 1821.5 3
 1 -8 -9 21144.3 1831.12 2
 1 8 -9 21537.6 1365.63 4
 -1 8 -9 21220.3 1764.64 3
 1 8 -9 22353.5 1690.76 5
 -1 -8 -7 7918 741.501 5
 1 -8 -7 8096.52 1147.72 2
 -1 8 -7 8205.66 890.266 1
 -1 -8 -7 7302.32 1070.14 2
 -1 8 -7 8566.23 939.984 5
 1 8 -7 7956.65 743.907 4
 -1 8 -7 8100.62 1090.97 3
 1 8 -7 6667.61 959.574 3
 -1 8 -7 8329.77 850.468 4
 1 -8 -7 7470.79 685.458 5
 1 8 -7 9322.34 1010.47 5
 1 8 -5 16212.2 1524.11 3
 -1 8 -5 15216.2 1505.38 3
 -1 8 -5 14741.6 1196.27 4
 -1 -8 -5 15296.8 853.875 5
 -1 8 -5 14911.2 1180.24 1
 1 8 -5 14953.2 1073.17 4
 1 8 -5 14146.4 1202.32 1
 1 8 -5 16098 1147.25 5
 -1 -8 -5 15063.1 739.865 8
 -1 -8 -5 15002.1 1540.64 2
 1 -8 -5 11445.8 1407.69 2
 1 -8 -5 12546.6 574.94 8
 1 -8 -5 14991.1 759.324 5
 -1 8 -5 14838.8 1069.61 5
 1 8 -3 36225.2 1915.59 1
 -1 8 -3 36938.4 1831.33 1
 -1 -8 -3 35521.9 1066.36 5
 1 8 -3 35688.5 1504.42 5
 -1 -8 -3 36033.3 2550.46 2
 1 -8 -3 38370.4 2864.64 2
 -1 8 -3 35549.8 1372.48 5
 -1 8 -1 9717.58 960.773 1
 -1 8 -1 9276 551.073 5
 -1 -8 -1 9298.75 551.545 5
 -1 -8 -1 11088.9 1606.17 2
 1 8 -1 10685.6 1036.64 1
 1 8 -1 8975.47 467.033 7
 1 -8 -1 9674.03 1642.42 2
 -1 8 -1 11016.1 860.133 7
 -1 8 -1 9792.06 1456.85 6
 -1 8 1 10255.6 997.3 1
 1 -8 1 8658.39 483.724 5
 1 -8 1 9152.15 1519.85 6
 1 8 1 8930.47 670.156 7
 -1 -8 1 9064.19 587.49 5
 -1 8 1 9649.31 744.736 7
 -1 -8 1 8262.14 871.717 1
 1 -8 1 9576.77 501.94 7
 1 -8 1 9348.53 887.337 1
 -1 -8 1 8576 1758.44 6
 -1 8 1 11813.9 2009.98 6
 1 8 1 9492.54 984.035 1
 -1 -8 3 39041.6 1856.09 1
 1 -8 3 41417.5 2554.2 6
 1 8 3 39975.7 2004.88 1
 1 -8 3 37392.4 1724.6 1
 -1 -8 3 37432.2 2599.83 6
 -1 8 3 32700.4 2785.04 6
 -1 8 3 38346.7 1971.21 1
 1 8 3 37490.7 1692.87 7
 -1 8 3 38594.6 1736.57 7
 -1 -8 3 35212.7 1420.15 5
 1 -8 3 35192.1 1325.44 5
 1 8 5 15190.3 1235.09 7
 1 8 5 16437.9 1313.65 1
 1 -8 5 15904.5 1409.17 6
 -1 -8 5 14798.2 1072.31 5
 1 -8 5 14746.4 1033.18 5
 -1 8 5 15815.5 1306.48 1
 1 -8 5 14906.8 1058.67 1
 -1 -8 5 16173 1500.05 6
 -1 -8 5 15787.5 1155.54 1
 1 8 7 9471.99 1025.57 1
 -1 -8 7 9414.9 1146.49 6
 -1 -8 7 8210.68 575.085 7
 -1 -8 7 8580.11 836.547 1
 1 -8 7 7886.77 961.832 6
 1 -8 7 8377.15 599.003 7
 -1 8 7 8007.15 950.248 1
 1 -8 7 7423.62 713.746 1
 1 -8 9 19829.8 1256.28 4
 -1 -8 9 18480.2 1112.29 4
 1 8 9 20172.3 1550.09 1
 -1 -8 9 20064.4 1630.67 6
 1 -8 9 20128.9 1115.96 1
 1 -8 9 22400.7 1667.73 6
 -1 8 9 21597.2 1593.01 1
 -1 -8 9 21379.9 1148.66 7
 -1 -8 9 20183.1 1246.66 1
 -1 8 9 20470.1 1313.68 5
 1 -8 9 21544.4 1180.93 7
 -1 8 11 8837.05 1067.8 1
 -1 -8 11 8804.99 860.103 7
 -1 -8 11 8407.71 753.918 1
 -1 -8 11 9319.41 1129.85 6
 1 8 11 9415.22 1099 1
 -1 -8 11 9554.27 843.535 4
 1 -8 11 9339.73 905.905 7
 1 -8 11 8527.7 670.077 1
 1 -8 11 9345.28 895.227 4
 1 8 11 10032.7 1457.69 4
 1 -8 11 10152 1169.76 6
 1 -8 13 17656.5 1634.1 6
 1 -8 13 16912.2 1293.16 4
 -1 8 13 15222.2 1447.55 1
 -1 -8 13 16929.4 1611.43 6
 -1 -8 13 16817.9 1205.53 4
 -1 8 13 17640.2 2080.07 4
 1 8 13 15812.3 1461.28 1
 1 8 13 17719.2 2011.17 4
 -1 -8 15 19780.4 1839.85 6
 1 8 15 17371.9 2132.19 4
 1 8 15 18314.1 1625.32 1
 1 -8 15 21855.1 1577.35 4
 -1 -8 15 19858.3 1431.91 4
 -1 8 15 17067.2 1580.52 1
 -1 8 15 19380.8 2267.01 4
 1 -8 15 19984.4 1832.73 6
 1 -8 17 7416.69 1195.73 6
 -1 -8 17 6331.51 1121.02 6
 -1 8 17 7575.23 1500.33 4
 1 -8 17 5430.42 813.515 4
 -1 8 17 3973.67 763.643 1
 1 8 17 6285.23 1339.32 4
 1 8 17 4182.76 771.461 1
 -1 -8 17 5055.2 771.451 4
 1 -8 19 89.7173 224.349 6
 -1 -8 19 -266.622 357.924 6
 -1 8 19 285.702 299.978 4
 1 8 19 -455.093 425.87 4
 1 8 21 381.077 518.147 4
 -1 -8 21 947.135 409.953 6
 -1 8 21 681.519 455.463 4
 1 -8 21 47.1839 385.385 6
 1 8 23 910.029 736.098 4
 -1 8 23 279.352 357.412 4
 -1 -9 -24 759.876 435.591 5
 1 -9 -24 588.439 568.97 5
 1 -9 -22 7234.46 1551.4 2
 -1 -9 -22 7039.3 1509.05 5
 1 -9 -22 5558.95 1348.14 5
 -1 -9 -22 7117.23 1528.55 2
 1 -9 -20 1755.06 813.285 2
 -1 -9 -20 1842.81 778.504 2
 1 9 -20 1484.05 711.681 5
 1 9 -20 2359.79 764.705 3
 -1 9 -20 1243.86 638.364 5
 1 -9 -20 1744.72 769.518 5
 -1 -9 -20 1139.63 531.507 5
 -1 9 -20 563.309 240.709 3
 -1 9 -18 1381.05 494.303 3
 1 9 -18 2100.18 661.839 3
 -1 -9 -18 1659.28 631.575 5
 -1 9 -18 2280.49 740.418 5
 1 -9 -18 2333.9 776.483 2
 1 -9 -18 2312.35 799.34 5
 1 9 -18 1901.76 736.662 5
 -1 -9 -18 1431.57 594.051 2
 -1 9 -16 2041.33 647.99 3
 1 9 -16 2470.57 767.879 3
 1 9 -16 2184.02 761.63 5
 -1 -9 -16 2081.02 831.284 2
 -1 -9 -16 1455.19 634.122 5
 1 -9 -16 1961.22 710.889 2
 -1 9 -16 2397.86 749.841 5
 1 -9 -16 2080.84 597.548 5
 -1 9 -14 15485 1778.08 5
 -1 9 -14 14690.1 1641.78 3
 -1 -9 -14 15652.5 1625.63 5
 -1 -9 -14 14004.8 1771.33 2
 1 9 -14 15442 1690.47 3
 1 9 -14 14538.9 1724.63 5
 1 -9 -14 15975.5 1603.62 5
 1 -9 -14 15611.2 1835.38 2
 -1 9 -12 2258.56 652.211 5
 -1 -9 -12 2908.22 639.789 5
 1 9 -12 3367.72 798.457 5
 -1 9 -12 2142.58 568.029 3
 1 -9 -12 2508.28 663.746 2
 1 9 -12 2408.64 616.218 3
 1 -9 -12 2784.07 612.333 5
 -1 -9 -12 1467.13 526.791 2
 -1 9 -10 292.054 200.139 5
 1 9 -10 720.128 250.65 4
 -1 -9 -10 530.101 218.92 2
 -1 -9 -10 782.218 257.385 5
 1 -9 -10 484.308 244.692 5
 1 9 -10 150.337 259.914 5
 1 9 -10 743.983 373.359 3
 -1 9 -10 1290.51 495.658 3
 1 -9 -10 732.282 452.35 2
 -1 -9 -8 1534.55 556.509 2
 -1 9 -8 1782.15 456.405 5
 -1 9 -8 763.268 260.642 4
 -1 -9 -8 1398.35 338.997 5
 1 9 -8 1627.97 492.812 3
 1 -9 -8 1179.61 330.837 5
 1 9 -8 952.837 258.435 4
 1 -9 -8 1417.36 519.547 2
 -1 9 -8 933.424 248.083 1
 -1 9 -8 1092.12 365.312 3
 1 9 -8 1073.96 381.132 5
 -1 9 -6 42625.8 2139.4 4
 -1 -9 -6 41632.4 1545.88 5
 -1 -9 -6 41869.1 1149.85 8
 1 -9 -6 41381.9 2798.89 2
 1 9 -6 41602.7 1887.44 4
 1 9 -6 44671.8 2705.73 3
 1 -9 -6 42393.5 1425.46 5
 1 9 -6 47508.9 2123.28 5
 -1 9 -6 42304.9 2131.17 1
 -1 -9 -6 35762.6 2548.19 2
 -1 9 -6 43266.1 2746.25 3
 1 9 -6 43119 2222.31 1
 -1 9 -6 47808.3 2083.56 5
 -1 -9 -4 6003.44 473.338 5
 1 9 -4 5653.07 831.486 1
 -1 9 -4 5162.99 869.511 4
 -1 9 -4 6248.92 657.985 5
 1 -9 -4 5225.84 1102.26 2
 1 9 -4 6366.21 706.001 5
 1 9 -4 5413.53 963.888 3
 1 -9 -4 5552.14 370.124 5
 -1 -9 -4 6126.98 1090.58 2
 -1 9 -4 7224.84 872.523 1
 -1 9 -2 8621.15 627.824 5
 1 9 -2 10073 1075.7 1
 1 -9 -2 11660.9 1813.04 2
 -1 -9 -2 11291.8 1685.85 2
 -1 9 -2 9453.65 981.951 1
 -1 9 0 20386.1 1455.35 1
 -1 -9 0 22987.6 2482.94 2
 1 9 0 22542 1582.94 1
 -1 -9 0 19162.3 798.456 5
 -1 9 0 21440 1093.33 7
 1 -9 0 25005.6 3213.19 6
 -1 -9 0 22578 3310.51 6
 1 9 0 19193.7 899.13 7
 -1 -9 2 8399.39 1529.17 6
 1 9 2 7835.73 947.209 1
 1 -9 2 8607.95 1380.41 6
 -1 9 2 7305.09 736.659 7
 -1 9 2 8703.49 975.877 1
 1 -9 2 7538.37 376.92 7
 -1 -9 2 8259.48 644.59 5
 1 9 2 7800.68 730.833 7
 1 -9 2 7877.37 563.689 5
 -1 9 4 7698.76 864.47 7
 -1 -9 4 7124.35 1159.22 6
 1 9 4 6799.03 801.166 7
 1 -9 4 6876.85 660.833 5
 -1 -9 4 7070.45 701.534 5
 1 9 4 8437.74 1005.89 1
 -1 9 4 7115.84 899.605 1
 1 -9 4 7084.56 1070.22 6
 1 -9 6 39809.3 1827.03 1
 -1 9 6 42435.4 2264.45 1
 1 -9 6 41325.5 1036.98 7
 1 9 6 44080.6 2340.19 1
 -1 -9 6 41424.2 2556.58 6
 1 -9 6 42123 2445.62 6
 1 -9 8 761.427 336.667 6
 -1 9 8 1999.24 514.853 1
 -1 -9 8 870.861 271.061 1
 -1 -9 8 1132.22 232.804 7
 -1 -9 8 1912.5 569.851 6
 1 9 8 1468.7 379.553 1
 1 -9 8 1194.13 313.948 1
 1 -9 8 1528.61 270.619 7
 -1 9 10 1123.78 437.413 1
 1 -9 10 1178.18 441.712 6
 -1 -9 10 679.267 210.693 7
 1 -9 10 739.409 237.2 1
 -1 -9 10 566.704 231.16 1
 -1 -9 10 808.58 346.874 6
 1 -9 10 624.063 218.984 7
 1 9 10 779.72 390.818 1
 1 -9 12 2041.16 441.107 4
 -1 9 12 3302.93 716.607 1
 -1 -9 12 2137.04 408.731 4
 -1 -9 12 1764.8 549.866 6
 1 9 12 1787.35 523.407 1
 1 -9 12 1487.83 464.004 6
 1 9 12 3133.06 836.245 4
 -1 -9 12 2128.1 407.656 1
 1 9 14 13893.3 1452.95 1
 -1 9 14 14866.7 2019.78 4
 -1 -9 14 16428 1255.45 4
 1 9 14 16901.8 2086.22 4
 -1 -9 14 15271.4 1670.99 6
 1 -9 14 16504.7 1360.43 4
 -1 9 14 14489 1500.47 1
 1 -9 14 17439.7 1738.79 6
 1 -9 16 2312.88 688.776 6
 1 9 16 1767.47 597.877 4
 1 9 16 1027.16 397.523 1
 -1 9 16 1037.68 563.701 4
 -1 -9 16 1153.36 355.756 4
 -1 9 16 1884.4 544.366 1
 -1 -9 16 1449.07 587.56 6
 1 -9 16 1749.38 495.281 4
 1 -9 18 2942.06 792.815 6
 1 9 18 2241.61 830.566 4
 -1 9 18 2854.22 958.533 4
 -1 -9 18 2960.6 774.956 6
 1 -9 18 1136.44 359.688 4
 1 9 20 763.274 680.823 4
 -1 -9 20 1343.72 552.83 6
 -1 9 20 2419.36 983.321 4
 1 -9 20 768.698 424.65 6
 1 9 22 5839.74 1532.56 4
 -1 9 22 6577.95 1611.95 4
 -1 -9 22 7024.76 1374.87 6
 1 -9 22 6912.25 1373.94 6
 1 -10 -23 -403.077 521.733 5
 -1 -10 -23 365.802 465.541 5
 -1 -10 -21 400.212 669.176 2
 1 -10 -21 417.781 424.833 5
 -1 -10 -21 396.641 437.693 5
 1 -10 -21 600.156 529.939 2
 -1 10 -21 650.825 632.522 5
 1 10 -21 1044.83 668.764 5
 1 10 -21 403.474 354.698 3
 -1 10 -19 3017.84 798.142 3
 1 -10 -19 4049.77 1110.47 2
 1 10 -19 2503.36 794.173 3
 -1 -10 -19 2443.56 748.565 5
 -1 -10 -19 2738.93 908.686 2
 1 10 -19 2542.54 930.259 5
 -1 10 -19 2465.75 926.478 5
 1 -10 -19 3729.61 1001.11 5
 -1 -10 -17 1439.36 465.474 5
 1 10 -17 2104.99 775.43 3
 -1 -10 -17 2115.85 865.336 2
 -1 10 -17 1870.28 684.036 5
 1 -10 -17 2597.69 862.916 2
 1 -10 -17 1828.14 658.998 5
 1 10 -17 1681.95 634.606 5
 -1 10 -17 1985.28 701.875 3
 1 -10 -15 5785.65 1226.52 2
 -1 10 -15 7380.94 1345.19 5
 1 10 -15 6682.28 1213.74 3
 -1 -10 -15 5658.22 997.492 5
 1 -10 -15 5083.92 924.026 5
 -1 10 -15 6266.35 1150.81 3
 1 10 -15 5972.2 1186 5
 -1 -10 -15 6624.51 1332.27 2
 1 10 -13 11454.8 1501.91 3
 -1 -10 -13 12118.8 1346.89 5
 1 -10 -13 12044 1311.16 5
 1 -10 -13 10771.4 1563.72 2
 -1 -10 -13 11681.1 1629.69 2
 -1 10 -13 12254.4 1542.48 5
 1 10 -13 12572.4 1547.04 5
 -1 10 -13 12655.3 1550.28 3
 -1 10 -11 1147.63 439.08 3
 1 10 -11 1129.23 472.348 5
 1 -10 -11 1183.8 380.133 5
 -1 -10 -11 942.233 359.717 5
 1 10 -11 1063.72 407.494 3
 -1 -10 -11 520.096 254.178 2
 1 -10 -11 1428.97 543.988 2
 -1 10 -11 955.448 377.258 5
 -1 10 -9 3358.86 802.845 3
 -1 -10 -9 5529.41 702.298 5
 1 -10 -9 5621.68 712.919 5
 1 -10 -9 5389.34 1067.68 2
 -1 -10 -9 4987.05 1020.3 2
 -1 10 -9 5668.94 892.304 5
 1 10 -9 4168.63 631.201 4
 1 10 -9 3763.07 872.283 3
 1 10 -9 5730.39 886.887 5
 -1 -10 -7 1274.27 284.599 5
 1 10 -7 2161.74 512.646 5
 -1 -10 -7 2299.6 682.206 2
 -1 10 -7 2726.96 602.807 1
 -1 10 -7 1513.72 430.342 5
 1 -10 -7 1563.43 314.255 5
 -1 10 -7 1520.01 580.797 3
 1 10 -7 1554.51 376.216 4
 1 10 -7 1595.65 483.34 1
 1 -10 -7 1134.24 520.144 2
 1 10 -7 1753.69 632.918 3
 1 -10 -5 10927.5 1553.31 2
 -1 -10 -5 11374.7 822.923 8
 1 10 -5 13263.8 1539.41 3
 -1 10 -5 11382.7 1163.58 1
 -1 10 -5 11175.8 1268.75 4
 1 -10 -5 10931 598.56 5
 -1 -10 -5 9957.6 1462.59 2
 1 10 -5 10798.4 986.381 5
 -1 10 -5 12173.8 1012.94 5
 1 10 -5 11690 1239.79 1
 -1 -10 -5 11831.8 717.554 5
 1 10 -5 11289 1174.85 4
 -1 10 -3 70104.1 2877.07 1
 -1 -10 -3 66924.3 1399.79 5
 1 10 -3 72087.8 2352.81 5
 -1 10 -3 72663.9 2085.68 5
 -1 -10 -3 80176.7 4398.48 2
 1 -10 -3 80713 4782.65 2
 1 10 -3 70569.2 2998.22 1
 1 10 -1 4005.44 726.753 1
 1 10 -1 4433.03 404.401 7
 -1 10 -1 4298.05 743.663 1
 -1 -10 -1 3843.86 333.903 5
 -1 10 -1 4819.02 660.712 7
 1 -10 -1 5977.35 1325.28 2
 -1 -10 -1 5397.97 1281.12 2
 1 10 1 3709.42 484.522 7
 -1 10 1 4399.41 733.089 1
 -1 -10 1 4537.43 444.347 5
 -1 -10 1 3833.36 1179.08 6
 1 -10 1 5300.47 1303.32 6
 -1 10 1 5000.32 598.459 7
 1 -10 1 4209.35 355.855 5
 1 10 1 4092.38 740.197 1
 -1 10 3 69905.3 2538.22 7
 1 -10 3 68353.4 1937.53 5
 -1 10 3 77387 3099.87 1
 1 10 3 68478.3 2458.54 7
 -1 -10 3 69766.6 4175.13 6
 -1 -10 3 70325.9 2093.34 5
 1 10 3 73849.3 3073.85 1
 1 -10 3 69698.6 3942.7 6
 -1 -10 5 10907.9 1463.56 6
 1 10 5 14354.3 1372.91 1
 1 -10 5 11729.6 1447.75 6
 -1 -10 5 12913.3 1043.58 5
 1 -10 5 11367.2 941.542 5
 -1 10 5 14134.3 1358.01 1
 1 -10 7 1376.58 199.977 7
 1 10 7 1832.27 497.384 1
 -1 -10 7 1351.08 500.475 6
 -1 -10 7 1047.91 157.991 7
 1 -10 7 1510.56 482.142 6
 -1 10 7 1476.78 496.628 1
 -1 10 9 6668.22 1005.77 1
 -1 -10 9 4678.01 901.05 6
 1 10 9 4716.67 823.428 1
 1 -10 9 4793.19 887.471 6
 1 -10 9 4808.96 638.039 1
 1 -10 9 4421.88 479.909 7
 -1 -10 9 4350.25 457.79 7
 -1 10 11 1152.19 452.198 1
 1 -10 11 809.48 254.22 7
 -1 -10 11 902.785 231.075 7
 1 -10 11 783.177 391.707 6
 1 -10 11 1127.65 294.428 1
 -1 -10 11 1429.46 511.752 6
 -1 -10 11 774.233 264.188 1
 1 10 11 677.632 315.896 1
 1 -10 13 10981.6 1373.77 6
 -1 -10 13 11163.4 1413.99 6
 -1 10 13 13198.2 1489.95 1
 1 10 13 12509.2 1817.87 4
 1 10 13 12379.2 1433.31 1
 1 -10 13 11542.4 1135.42 4
 -1 10 15 4471.86 1136.16 4
 1 10 15 6496.22 1077.44 1
 1 -10 15 5970.37 852.32 4
 -1 -10 15 6404.54 1092.09 6
 -1 10 15 5705.43 1034.37 1
 1 -10 15 6243.02 1094.08 6
 -1 -10 15 3574.33 625.787 4
 1 10 15 6274.47 1351.59 4
 -1 10 17 1732.17 805.222 4
 1 -10 17 2505.96 732.42 6
 -1 10 17 1956.91 583.029 1
 1 -10 17 747.849 262.085 4
 1 10 17 1932.87 850.95 4
 1 10 17 1218.15 480.705 1
 -1 -10 17 1361.12 581.546 6
 1 -10 19 3665.38 974.522 6
 1 10 19 3022.53 1095.63 4
 -1 -10 19 2486.89 769.454 6
 -1 10 19 2662.9 1103.93 4
 1 -10 21 232.585 264.273 6
 -1 -10 21 -47.5422 292.293 6
 -1 10 21 808.189 668.941 4
 1 10 21 556.936 372.157 4
 1 -11 -20 2436.59 800.864 5
 1 11 -20 2179.44 902.775 5
 -1 11 -20 2426 1103.48 5
 -1 -11 -20 3534.93 1234.63 2
 1 11 -20 2961.29 1029.92 3
 -1 11 -20 2389.04 904.607 3
 -1 -11 -20 2637.93 836.015 5
 1 -11 -20 1843.76 946.692 2
 1 11 -18 3114.99 919.076 3
 1 11 -18 4546.73 1196.08 5
 1 -11 -18 3417.96 907.113 5
 -1 -11 -18 4707.29 1247.7 2
 -1 11 -18 4357.06 1179.87 5
 1 -11 -18 4159.05 1157.13 2
 -1 11 -18 4149.75 1036.73 3
 -1 -11 -18 3974.82 955.857 5
 -1 11 -16 770.583 458.627 3
 -1 11 -16 2184.41 711.58 5
 1 -11 -16 783.673 271.86 5
 1 11 -16 934.409 519.676 5
 1 11 -16 1321.53 539.257 3
 -1 -11 -16 277.766 164.449 5
 1 -11 -16 874.558 411.712 2
 -1 -11 -16 928.18 645.885 2
 1 11 -14 2309.55 649.436 3
 -1 -11 -14 4103.54 846.285 5
 -1 -11 -14 3937.69 1002.18 2
 -1 11 -14 4719.88 991.109 5
 1 -11 -14 3555.63 1007.17 2
 -1 11 -14 3614.53 865.198 3
 1 11 -14 3757.44 944.57 5
 1 -11 -14 3131.2 704.96 5
 1 11 -12 4122.4 880.834 5
 1 -11 -12 4028.53 715.964 5
 -1 -11 -12 3878.17 718.109 5
 1 -11 -12 2932.6 826.627 2
 -1 11 -12 3605.55 884.567 5
 -1 -11 -12 3669.3 907.335 2
 1 11 -12 3117.94 768.236 3
 -1 11 -12 2885.95 724.594 3
 1 -11 -10 3920.23 992.079 2
 1 11 -10 2782.15 793.658 3
 -1 11 -10 3454.09 775.992 5
 -1 11 -10 2922.84 787.936 3
 -1 -11 -10 2882.36 551.81 5
 1 -11 -10 2782.63 509.26 5
 1 11 -10 2227.19 597.136 5
 -1 -11 -10 3022.21 931.33 2
 -1 11 -8 2482.37 842.359 5
 -1 -11 -8 964.428 482.614 2
 1 11 -8 1167.43 353.484 4
 1 -11 -8 1458.57 666.268 2
 -1 11 -8 1668.66 746.229 3
 -1 11 -8 3156.83 734.895 1
 1 11 -8 1614.69 612.654 3
 1 -11 -8 1263.16 314.045 5
 -1 -11 -8 1093.51 282.922 5
 1 11 -8 945.996 356.717 5
 1 11 -6 2219.59 678.242 3
 -1 11 -6 2709.59 649.772 1
 1 11 -6 2137.92 496.306 5
 1 -11 -6 1661.79 260.201 8
 1 11 -6 2339.91 595.117 1
 -1 -11 -6 2147.6 347.278 8
 1 11 -6 2034.48 477.536 4
 1 -11 -6 2445.37 809.967 2
 -1 -11 -6 2192.93 347.854 5
 1 -11 -6 2283.48 305.903 5
 -1 11 -6 1820.99 676.947 3
 -1 11 -6 2930.54 564.393 5
 -1 -11 -6 1423.21 524.841 2
 1 -11 -6 1759.47 232.23 8
 -1 11 -4 13264.4 1338.05 1
 -1 11 -4 13079.1 994.045 5
 -1 -11 -4 12421.1 628.888 5
 1 11 -4 13517 1101 5
 1 -11 -4 13761.2 1983.63 2
 -1 -11 -4 14437.6 1938.77 2
 1 11 -4 14545.7 1436.7 1
 -1 -11 -2 30306.2 900.124 5
 -1 11 -2 32683.2 2106.83 1
 1 -11 -2 39666.9 3624.98 2
 -1 -11 -2 43728.2 3537.58 2
 1 11 -2 33088.5 2150.36 1
 -1 11 -2 33091.2 1398.98 5
 1 11 0 6597.83 590.187 7
 -1 11 0 6946.54 966.761 1
 -1 11 0 8070.86 774.061 7
 -1 -11 0 8710.2 1586.31 2
 1 -11 0 9011.11 2042.03 6
 1 -11 0 6443.03 1458.62 2
 -1 -11 0 6797.37 487.436 5
 -1 -11 0 7124.98 2010.91 6
 1 11 0 6939.43 995.592 1
 -1 -11 2 30496.8 1281.37 5
 -1 11 2 32757.6 2121.95 1
 1 11 2 34292 2188.64 1
 1 11 2 31148 1584.24 7
 1 -11 2 35258.8 3325.24 6
 -1 -11 2 33799.6 3347.01 6
 -1 11 2 31681.5 1672.96 7
 1 -11 2 29585.9 1141.63 5
 1 -11 4 11561 897.264 5
 -1 11 4 12515.7 1326 1
 1 -11 4 11504.6 1679.09 6
 -1 -11 4 11308.1 1673.34 6
 -1 -11 4 12128.8 956.629 5
 1 11 4 11397.5 1321.12 1
 1 11 6 1532.37 424.571 1
 1 -11 6 2260.44 648.965 6
 -1 11 6 2776.36 650.331 1
 -1 -11 6 1387.36 523.162 6
 1 -11 8 1212.93 204.514 7
 -1 -11 8 1132.29 445.979 6
 -1 11 8 1179.44 427.733 1
 1 11 8 1387.61 452.221 1
 -1 -11 8 1129.51 165.612 7
 1 11 10 3304.84 740.169 1
 -1 -11 10 2934.59 386.151 7
 1 -11 10 3931.38 871.802 6
 -1 -11 10 4621.05 955.34 6
 -1 11 10 3178.43 759.947 1
 1 -11 10 3065.59 405.107 7
 1 11 12 3729.33 814.53 1
 1 11 12 4162.77 1096.74 4
 -1 -11 12 4326.4 922.143 6
 -1 11 12 3240.17 778.973 1
 1 -11 12 3961.91 852.799 6
 -1 11 14 2360.79 785.516 4
 1 -11 14 4434.96 951.926 6
 -1 -11 14 3016.85 793.83 6
 1 11 14 3310.4 771.745 1
 -1 11 14 3316.11 808.102 1
 1 11 14 2334.32 897.217 4
 1 11 16 748.958 400.142 1
 1 -11 16 1317.51 568.248 6
 -1 11 16 1215.6 477.774 1
 -1 -11 16 468.223 280.026 6
 1 11 16 1077.48 618.841 4
 -1 11 16 985.782 661.157 4
 -1 -11 18 3064.24 871.997 6
 1 -11 18 4115.65 1050.73 6
 -1 11 18 1992.1 890.857 4
 1 11 18 3654.08 1194.37 4
 1 -11 20 2410.94 871.331 6
 -1 -11 20 2582.11 891.613 6
 -1 11 20 3911.1 1306.64 4
 1 11 20 2482.79 1061.5 4
 1 12 -21 3778.16 1256.98 5
 -1 12 -21 2145.46 974.455 5
 1 -12 -21 2774.64 1110.79 2
 1 12 -21 1440.85 709.536 3
 -1 12 -19 1437.09 836.241 5
 1 12 -19 1454.72 717.382 3
 1 -12 -19 2365.85 1036.67 2
 -1 12 -19 1709.99 868.224 3
 -1 -12 -19 1064.1 591.336 5
 -1 -12 -19 1315.86 825.216 2
 1 12 -19 2593.25 1051.96 5
 -1 -12 -17 2163.14 801.919 2
 1 -12 -17 1896.93 644.557 5
 1 12 -17 2113.01 796.76 5
 -1 -12 -17 2606.44 739.569 5
 1 12 -17 2667.67 841.33 3
 1 -12 -17 3462.4 1058.88 2
 -1 12 -17 2547.4 867.852 5
 -1 12 -17 1397.98 544.218 3
 -1 12 -15 715.048 298.711 3
 -1 -12 -15 492.585 267.803 5
 -1 12 -15 1575.2 637.219 5
 1 -12 -15 746.117 383.739 5
 -1 -12 -15 585.126 364.994 2
 1 12 -15 1054.58 640.499 5
 1 -12 -15 623.499 397.165 2
 1 12 -15 266.123 213.421 3
 1 -12 -13 3262.13 672.593 5
 1 12 -13 3260.7 854.814 5
 -1 -12 -13 2763.31 885.99 2
 1 12 -13 1848.93 646.57 3
 -1 -12 -13 2544.12 623.026 5
 -1 12 -13 2573.31 606.861 5
 -1 12 -13 2575.29 726.964 3
 1 -12 -13 1262.36 480.437 2
 1 -12 -11 2466.34 535.843 5
 -1 12 -11 3861.09 803.726 5
 -1 -12 -11 2952.89 587.822 5
 1 12 -11 1740.97 615.137 3
 -1 12 -11 1920.26 653.442 3
 1 12 -11 3222.57 755.882 5
 -1 -12 -11 1697.1 598.183 2
 1 -12 -11 2441.41 888.748 2
 1 12 -9 3277.45 716.727 5
 -1 12 -9 2896.54 679.397 1
 -1 12 -9 4362.4 1008.72 3
 1 -12 -9 3818.93 565.4 5
 -1 12 -9 3583.78 714.968 5
 1 -12 -9 4303.73 1100.07 2
 -1 -12 -9 3533.61 553.464 5
 -1 -12 -9 2744.77 921.158 2
 1 12 -9 4242.6 1022.21 3
 -1 -12 -7 1027.38 212.135 8
 1 12 -7 1787.43 508.994 1
 -1 -12 -7 123.881 259.683 2
 1 12 -7 1444.05 470.234 5
 1 12 -7 864.83 311.361 4
 -1 -12 -7 1376.57 275.548 5
 -1 12 -7 1334.21 467.801 5
 1 -12 -7 1370.43 258.524 5
 -1 12 -7 1212.83 461.986 1
 -1 12 -7 1138.47 546.061 3
 1 -12 -7 530.122 352.32 2
 1 12 -7 1213.8 524.304 3
 -1 -12 -5 15706.5 2077.07 2
 1 12 -5 19811.3 2149 3
 1 12 -5 19763.5 1836.41 1
 1 -12 -5 12052 1924.77 2
 1 12 -5 18136.4 1398.99 5
 -1 12 -5 14944.1 1495.55 1
 -1 12 -5 15662.5 1197.27 5
 -1 -12 -5 15392.5 760.521 5
 -1 12 -3 793.598 244.958 5
 1 -12 -3 389.815 435.263 2
 -1 -12 -3 528.407 123.962 5
 -1 12 -3 356.172 272.446 1
 -1 -12 -3 741.036 138.048 5
 -1 -12 -3 1119.78 645.611 2
 1 12 -1 9446.71 714.271 7
 -1 -12 -1 8193.66 467.742 5
 -1 12 -1 10035.2 1212.76 1
 1 12 -1 11082.6 1297.76 1
 -1 -12 -1 14021 2129.33 2
 -1 12 -1 10458.1 1127.86 7
 1 -12 -1 14083.2 2222.97 2
 -1 12 1 10185.3 929.601 7
 -1 12 1 10541.6 1277.95 1
 1 -12 1 8025.46 506.678 5
 1 12 1 10052.2 1243.88 1
 -1 -12 1 10599.7 2242.93 6
 -1 -12 1 9797.67 656.896 5
 1 -12 1 8673.59 1968.57 6
 1 12 1 9226.07 821.167 7
 -1 12 3 1000.24 463.509 1
 -1 -12 3 317.065 149.563 5
 1 -12 3 655.791 195.378 5
 1 12 3 679.688 280.178 7
 1 -12 3 938.51 700.196 6
 -1 -12 3 1617.81 1008.37 6
 -1 12 3 662.382 298.445 7
 -1 12 5 16146.7 1628.73 1
 -1 -12 5 19310.3 2280.19 6
 1 -12 5 15251.8 1922.67 6
 1 -12 5 16485.2 1167.79 5
 1 12 5 22373.1 1928.71 1
 -1 -12 7 1276.17 616.139 6
 1 -12 7 1302.8 550.407 6
 1 12 7 2137.52 687.611 1
 -1 12 7 1197.26 445.833 1
 -1 12 9 3243.01 761.748 1
 1 12 9 3854.5 847.583 1
 1 -12 9 2746.4 301.752 7
 1 -12 9 3355.08 828.607 6
 -1 -12 9 4363.53 957.22 6
 -1 -12 11 3145 854.408 6
 1 12 11 4637.01 942.503 1
 -1 12 11 3418.83 807.852 1
 1 -12 11 2898.04 721.298 6
 1 12 13 2389.27 880.939 4
 -1 -12 13 3280.04 920.993 6
 1 -12 13 1991.32 702.888 6
 -1 12 13 2293.01 658.156 1
 1 12 13 3327.19 821.801 1
 -1 12 15 1291.43 794.695 4
 -1 12 15 1480.34 692.076 1
 -1 -12 15 1721.92 657.37 6
 1 -12 15 959.1 462.018 6
 1 12 15 1038.33 439.397 1
 1 12 15 936.445 664.865 4
 -1 12 17 2247.39 706.896 1
 1 12 17 2273.42 895.218 4
 -1 12 17 2715.26 1092.32 4
 -1 -12 17 2131.21 791.444 6
 1 -12 17 1785.93 657.845 6
 1 12 17 2742.04 810.839 1
 -1 -12 19 1779.92 813.092 6
 -1 12 19 1366.96 701.845 4
 1 12 19 2403.56 1137.02 4
 1 -12 19 2080.64 836.679 6
 1 13 -20 3734.82 1187.63 3
 1 13 -20 6126.65 1517.66 5
 -1 13 -20 4832.18 1303.21 5
 1 -13 -20 4596.17 1500.2 2
 -1 -13 -20 3829.62 1289.46 2
 -1 13 -20 4006.62 1232.58 3
 1 13 -18 6529 1374.82 3
 -1 13 -18 5277.56 1283.4 5
 -1 13 -18 4045.65 1164.19 3
 1 -13 -18 8135.03 1779.42 2
 -1 -13 -18 5540.97 1438.99 2
 1 13 -18 7052.62 1463.11 5
 -1 13 -16 748.268 479.58 5
 1 13 -16 1177.89 586.137 3
 -1 13 -16 435.318 288.612 3
 -1 -13 -16 1247.85 648.742 2
 -1 -13 -16 832.981 438.319 5
 1 13 -16 1799.22 714.166 5
 1 -13 -16 1374 684.226 2
 1 13 -14 4227.16 1015.41 3
 1 -13 -14 4888.62 853.819 5
 -1 13 -14 4937.27 1026.49 5
 1 13 -14 6107.4 1163.69 5
 -1 -13 -14 3919.43 1095.4 2
 -1 -13 -14 4576.92 844.705 5
 -1 13 -14 3524.48 861.427 3
 1 -13 -14 3332.78 987.055 2
 -1 13 -12 81.6977 146.178 5
 -1 13 -12 -192.336 571.844 3
 -1 -13 -12 283.553 130.644 5
 1 13 -12 220.03 245.222 3
 -1 -13 -12 -181.787 454.145 2
 1 13 -12 504.536 384.627 5
 1 -13 -12 -152.852 554.969 2
 1 -13 -12 237.184 221.398 5
 -1 13 -10 1274.43 440.93 5
 1 -13 -10 750.455 252.605 5
 -1 -13 -10 529.774 220.96 5
 1 13 -10 825.485 386.24 3
 -1 -13 -10 697.703 296.89 2
 1 13 -10 1138.37 452.732 5
 1 -13 -10 467.63 406.551 2
 -1 13 -10 1095.07 453.119 3
 1 13 -8 643.49 323.863 1
 1 13 -8 597.129 257.589 3
 -1 -13 -8 512.908 190.279 5
 1 13 -8 943.456 394.775 5
 -1 -13 -8 612.336 508.379 2
 1 -13 -8 672.144 581.228 2
 1 -13 -8 478.956 183.543 5
 -1 13 -8 932.648 569.293 3
 -1 13 -8 1083.84 389.874 5
 -1 13 -8 264.297 374.243 1
 1 13 -6 2125.63 710.004 3
 1 13 -6 2135.04 600.122 1
 -1 -13 -6 1882.48 750.332 2
 -1 -13 -6 1361.07 343.235 8
 1 -13 -6 1597.74 210.489 5
 -1 13 -6 1542.6 509.625 1
 -1 -13 -6 2001.31 295.222 5
 -1 13 -6 1624.16 631.209 3
 1 13 -6 2598.95 569.712 5
 -1 13 -6 2003.9 496.523 5
 1 -13 -6 1980.92 788.498 2
 -1 -13 -4 10339.6 1775.32 2
 1 13 -4 8105.59 1262.85 1
 1 -13 -4 9102.8 1785.92 2
 -1 -13 -4 6933.76 384.593 5
 -1 13 -4 8567.5 844.515 5
 -1 13 -4 8156.39 1194.53 1
 -1 -13 -2 19459.8 2534.05 2
 1 -13 -2 20171.4 2730.89 2
 1 13 -2 14242.7 1548.22 1
 -1 13 -2 16949.9 1735.83 1
 1 13 0 -277.301 357.721 1
 -1 -13 0 372.994 522.447 2
 1 13 0 300.738 158.895 7
 1 -13 0 894.455 769.326 2
 1 -13 0 1359.31 1280.98 6
 -1 13 2 17077.7 1353.55 7
 -1 13 2 18667.7 1822.9 1
 1 13 2 13854.3 1134.39 7
 1 -13 2 15475.7 2535.28 6
 1 13 2 15113.8 1594.49 1
 -1 -13 2 14467.9 2484.71 6
 1 -13 2 13610.7 795.169 5
 -1 -13 2 14373.9 892.332 5
 1 13 4 5337.81 960.868 1
 1 -13 4 5646.76 1336.54 6
 -1 13 4 7406.84 1155.41 1
 1 -13 4 6649.91 696.7 5
 -1 -13 4 7879.93 1569.77 6
 -1 -13 4 6193.06 702.331 5
 1 13 6 2356.83 651.962 1
 -1 13 6 3126.95 789.342 1
 -1 -13 6 1333.2 479.606 6
 1 -13 6 2639.42 810.043 6
 1 -13 8 231.062 575.853 6
 -1 13 8 1632.8 701.741 1
 1 13 8 334.491 364.627 1
 -1 -13 8 834.007 464.731 6
 1 -13 10 927.73 512.629 6
 1 13 10 697.468 428.766 1
 -1 -13 10 1053.56 546.695 6
 -1 13 10 2066.21 740.749 1
 -1 -13 12 146.797 290.248 6
 1 -13 12 234.232 433.292 6
 1 13 12 218.236 372.074 1
 -1 13 12 372.073 339.345 1
 1 -13 14 5607.75 1161.55 6
 -1 13 14 4932.3 1076.44 1
 1 13 14 5363.02 1269.49 4
 -1 -13 14 5100.48 1102.63 6
 1 13 14 4147.49 922.577 1
 -1 -13 16 974.886 554.872 6
 -1 13 16 1369.59 613.495 1
 -1 13 16 461.665 475.128 4
 1 13 16 1360.76 606.49 1
 1 13 16 770.788 590.968 4
 1 -13 16 1798.79 773.276 6
 -1 -13 18 5354.94 1284.07 6
 1 -13 18 6698.62 1357.01 6
 -1 13 18 4216.55 1324.03 4
 -1 13 18 5461.44 1175.17 1
 1 13 18 5712.44 1417.74 4
 -1 -13 20 6149.55 1390.77 6
 1 13 20 4156.09 1310.5 4
 -1 13 20 3111.89 1192.2 4
 1 14 -21 338.895 307.259 3
 1 14 -19 1241.32 654.912 5
 -1 14 -19 702.372 429.986 3
 1 -14 -19 1432.02 916.099 2
 -1 14 -19 1657.79 787.43 5
 1 14 -19 613.233 497.262 3
 -1 -14 -19 1826.77 995.129 2
 1 -14 -17 892.417 580.306 2
 1 14 -17 641.742 503.704 5
 -1 -14 -17 658.919 566.913 2
 -1 14 -17 312.157 363.685 5
 1 14 -17 215.08 241.901 3
 -1 14 -17 157.755 422.126 3
 1 -14 -15 480.456 205.577 2
 -1 -14 -15 903.394 592.277 2
 -1 14 -15 -98.519 548.606 3
 1 14 -15 726.359 489.785 5
 1 14 -15 109.463 495.978 3
 -1 14 -15 917.173 456.206 5
 1 14 -13 1491.57 501.565 5
 -1 -14 -13 1293.43 526.026 2
 -1 14 -13 1787.53 672.739 3
 -1 14 -13 1348.87 445.549 5
 1 14 -13 766.144 288.784 3
 1 -14 -13 1560.53 651.893 2
 -1 14 -11 885.726 395.372 3
 -1 14 -11 916.613 380.201 5
 1 -14 -11 1127.51 314.563 5
 1 -14 -11 457.617 350.433 2
 -1 -14 -11 652.274 548.454 2
 -1 -14 -11 863.029 316.081 5
 1 14 -11 1026.81 574.938 3
 1 14 -11 899.445 388.492 5
 -1 -14 -9 4472.04 1183.57 2
 -1 14 -9 7265.06 1017.56 5
 1 -14 -9 3934.32 1131.87 2
 -1 -14 -9 6192.93 686.588 5
 -1 14 -9 5831.75 1026.18 1
 1 -14 -9 6488.6 653.349 5
 -1 14 -9 7114.13 1460.29 3
 1 14 -9 7403.98 1406.5 3
 1 14 -9 6952.06 1040.32 5
 1 14 -7 10063.2 1631.47 3
 -1 14 -7 8286.71 1514.43 3
 -1 -14 -7 9711.24 693.71 5
 -1 -14 -7 8542.63 1678.26 2
 1 14 -7 10399.9 1440.15 1
 1 14 -7 10185.1 1164.29 5
 -1 14 -7 10397.8 1128.64 5
 1 -14 -7 8647.17 535.193 5
 1 -14 -7 7529.14 641.316 8
 -1 -14 -7 6325.8 671.988 8
 -1 14 -7 11058.3 1466.1 1
 1 -14 -7 6803.49 1536.84 2
 1 14 -5 5829.4 1014.47 1
 1 -14 -5 7125.32 1588.42 2
 -1 -14 -5 6948.55 1500.03 2
 -1 14 -5 6194.86 1081.58 1
 1 14 -5 6641.68 891.563 5
 -1 14 -5 6882.82 848.275 5
 -1 -14 -5 4282.4 309.527 5
 1 14 -5 4978.18 1132.25 3
 -1 14 -3 21624.1 1975.66 1
 -1 -14 -3 26401.8 2983.83 2
 1 -14 -3 26144.4 3158.46 2
 1 14 -3 21435.6 2005.87 1
 -1 14 -1 7579.82 1177.98 1
 1 14 -1 8235.17 1230.68 1
 -1 14 -1 8867.48 1198.43 7
 1 14 -1 7489.58 780.8 7
 -1 -14 -1 9767.29 1874.16 2
 -1 -14 -1 6118.94 345.075 5
 1 -14 -1 9257.81 1889.96 2
 1 14 1 7434.78 1182.8 1
 1 -14 1 9977.35 2265.49 6
 -1 -14 1 8108 1641.21 2
 -1 -14 1 6267.3 529.004 5
 -1 -14 1 8889.71 1966.29 6
 -1 14 1 6934.88 1126.07 1
 1 14 1 7195.32 773.062 7
 1 -14 1 6419.77 446.355 5
 -1 14 1 7475.69 885.489 7
 1 -14 3 18587.3 1068.72 5
 -1 14 3 19542 1934.69 1
 1 14 3 22414.8 2057.9 1
 1 -14 3 21381.8 2764.6 6
 -1 -14 3 18322.2 1140.25 5
 -1 -14 3 20110.6 2802.9 6
 -1 -14 5 3803.82 1114 6
 1 14 5 6254.81 1108.5 1
 1 -14 5 4926.64 649.046 5
 -1 14 5 4547.32 940.104 1
 1 -14 5 5011.03 1212.31 6
 -1 14 7 10007.6 1383.21 1
 -1 -14 7 9758.62 1642.11 6
 1 14 7 10146.4 1438 1
 1 -14 7 9959.89 1587.14 6
 1 -14 9 7441.5 1304.53 6
 -1 14 9 7098.44 1199.11 1
 1 14 9 8141.44 1305.56 1
 -1 -14 9 7256.87 1377.19 6
 -1 -14 11 1303.99 629.149 6
 -1 14 11 862.257 357.986 1
 1 -14 11 801.902 447.151 6
 1 14 11 440.912 175.433 1
 -1 -14 13 1699.02 714.458 6
 -1 14 13 1396.03 529.158 1
 1 14 13 1390.49 690.75 4
 1 14 13 1003.1 535.345 1
 1 -14 13 2739.18 826.585 6
 1 -14 15 1038.88 598.904 6
 -1 -14 15 1278.44 617.368 6
 -1 14 15 564.043 326.15 4
 1 14 15 38.5147 290.268 4
 1 14 15 780.133 474.484 1
 -1 14 15 306.596 300.95 1
 1 14 17 -97.7283 302.375 4
 -1 -14 17 -65.217 240.03 6
 1 14 17 249.007 335.939 1
 1 -14 17 526.868 343.721 6
 -1 14 17 332.044 431.818 4
 -1 14 17 -102.101 253.745 1
 1 -14 19 1465.19 721.796 6
 1 14 19 279.446 504.011 4
 -1 14 19 1170.06 633.696 4
 -1 -14 19 1207.77 585.461 6
 -1 15 -20 1381.98 686.664 5
 1 15 -20 2348.82 914.241 5
 1 15 -20 3063.9 1075.13 3
 -1 15 -20 2054.39 965.12 3
 1 -15 -18 587.993 603.15 2
 -1 15 -18 1189.99 653.229 5
 -1 -15 -18 1356.19 775.225 2
 -1 15 -18 372.111 247.769 3
 1 15 -18 975.65 587.78 3
 1 15 -18 589.682 521.768 5
 1 15 -16 -151.646 394.361 3
 -1 -15 -16 203.907 544.809 2
 -1 15 -16 336.043 251.49 3
 1 -15 -16 -77.0475 475.058 2
 -1 15 -16 1075.64 651.88 5
 1 15 -16 1292.6 587.019 5
 1 -15 -14 513.873 376.272 2
 -1 15 -14 813.075 342.561 3
 -1 -15 -14 330.595 506.394 2
 1 15 -14 57.0056 394.135 3
 -1 15 -14 27.4486 317.391 5
 1 15 -14 9.42673 192.926 5
 1 -15 -12 3278.1 1084.12 2
 1 15 -12 3829.27 847.706 5
 -1 -15 -12 3313.56 1056.76 2
 -1 15 -12 4063.97 1035.9 3
 -1 15 -12 3367.88 855.87 5
 1 15 -12 4897.42 1147.45 3
 -1 15 -10 -169.276 396.027 3
 1 15 -10 131.469 160.535 5
 1 15 -10 -190.827 339.699 3
 1 -15 -10 -282.504 540.599 2
 -1 15 -10 -464.145 402.946 5
 -1 -15 -10 -279.846 653.323 2
 -1 15 -8 -53.886 283.54 1
 1 15 -8 150.465 308.098 1
 1 15 -8 702.679 340.562 5
 -1 15 -8 619.811 523.27 3
 -1 -15 -8 -253.29 434.798 2
 1 15 -8 850.388 608.967 3
 -1 15 -8 416.258 249.756 5
 1 -15 -8 362.388 519.523 2
 -1 -15 -6 4572.53 1234.02 2
 1 15 -6 3879.98 717.492 5
 1 15 -6 5921.74 1325.82 3
 -1 -15 -6 4430.43 684.792 8
 -1 15 -6 5179.69 1194.91 3
 1 15 -6 4758.23 1048.82 1
 -1 15 -6 5191.8 1000.23 1
 1 -15 -6 4836.08 1422.63 2
 -1 15 -6 5030.77 774.65 5
 1 15 -4 10140.4 1500.82 1
 -1 15 -4 8514.69 1283.28 1
 -1 -15 -4 11874 2036.47 2
 1 -15 -4 11079.2 2064.46 2
 -1 15 -2 1905.28 583.432 1
 1 15 -2 3442.24 932.596 1
 1 -15 -2 2973.93 1131.44 2
 -1 -15 -2 3904.48 1173.72 2
 1 15 0 1341.18 405.929 7
 1 -15 0 1917.24 784.084 2
 -1 15 0 415.173 203.692 7
 1 15 0 2084.18 878.269 1
 -1 15 0 699.996 453.283 1
 -1 -15 0 2101.65 973.493 2
 1 -15 2 2614.61 1005.36 6
 -1 15 2 2341.86 525.476 7
 1 -15 2 1889.82 298.886 5
 -1 15 2 2809.14 741.22 1
 -1 -15 2 2034.9 994.717 6
 1 15 2 2738.29 553.974 7
 1 15 2 4998.58 1087.21 1
 -1 -15 2 1992.61 344.777 5
 1 15 4 10605.4 1572.09 1
 -1 -15 4 8404.85 842.016 5
 1 -15 4 10090 1850.43 6
 -1 15 4 9131.15 1358.89 1
 1 -15 4 8279.64 794.193 5
 -1 -15 4 10919.7 1991.76 6
 1 15 6 5369.7 1128.64 1
 -1 -15 6 4217.47 1132.37 6
 1 -15 6 2479.25 805.701 6
 -1 15 6 3696.45 943.443 1
 1 15 8 256.529 255.38 1
 1 -15 8 81.1262 247.347 6
 -1 -15 8 4.21087 273.032 6
 -1 15 8 -137.114 340.948 1
 1 15 10 -296.955 358.554 1
 -1 15 10 157.882 188.013 1
 -1 -15 10 -153.245 432.722 6
 1 -15 10 -690.717 620.196 6
 1 -15 12 4627.3 1115.32 6
 -1 15 12 4235.19 1025.3 1
 1 15 12 3657.49 1019.24 1
 -1 -15 12 3553.52 1020.58 6
 -1 15 14 378.653 390.35 1
 1 15 14 1209.12 546.916 1
 -1 -15 14 716.353 529.232 6
 1 15 14 903.664 574.088 4
 1 -15 14 716.724 396.934 6
 -1 15 16 761.428 590.115 1
 -1 15 16 1289.31 702.496 4
 1 15 16 -43.1128 470.758 4
 1 15 16 441.834 505.001 1
 1 -15 16 238.144 352.683 6
 -1 -15 16 507.195 498.097 6
 -1 15 18 1082.22 533.687 1
 1 15 18 1755.73 820.706 4
 -1 -15 18 1407.39 719.737 6
 -1 15 18 904.205 761.842 4
 1 -15 18 508.296 354.639 6
 1 16 -19 1094.8 625.638 5
 -1 16 -19 924.654 480.265 5
 1 16 -19 86.5396 252.057 3
 -1 16 -19 661.807 218.217 3
 1 -16 -17 1422.02 748.86 2
 -1 -16 -17 1923.12 884.782 2
 -1 16 -17 2228.33 865.97 5
 1 16 -17 2122.95 826.858 3
 -1 16 -17 1071.94 529.469 3
 1 16 -17 2937.27 938.764 5
 -1 16 -15 15150.4 2307.52 3
 1 -16 -15 16060.2 2585.55 2
 1 16 -15 14944.5 2256.64 3
 1 16 -15 18789.7 2156.28 5
 -1 16 -15 22136.6 2337.39 5
 -1 -16 -15 12998.4 2371.74 2
 1 16 -13 430.34 402.353 5
 -1 16 -13 489.49 431.054 3
 1 -16 -13 -436.381 665.283 2
 1 16 -13 234.151 337.474 3
 -1 16 -13 387.87 334.794 5
 -1 -16 -13 -565.025 742.851 2
 1 16 -11 702.386 524.031 3
 1 -16 -11 1145.1 700.238 2
 1 16 -11 1652.38 632.47 5
 -1 16 -11 1801.72 735.283 3
 -1 -16 -11 354.602 292.559 2
 -1 16 -11 1410.32 442.265 5
 1 -16 -9 1759.53 866.712 2
 -1 16 -9 2695.29 790.841 1
 -1 16 -9 2259.39 555.791 5
 1 16 -9 1825.35 566.686 5
 1 16 -9 1752.05 725.729 3
 -1 16 -9 2297.08 909.016 3
 -1 -16 -9 1521.02 696.609 2
 1 16 -7 11832.2 1683.04 1
 -1 16 -7 11554.3 1226.14 5
 -1 -16 -7 11612.5 2121.05 2
 -1 16 -7 12925.4 1695.4 1
 1 16 -7 11633.9 1831.79 3
 1 -16 -7 8742.05 1889.06 2
 -1 16 -7 9388.84 1733.13 3
 1 16 -7 11052.5 1280.32 5
 1 -16 -5 4092.97 1310.02 2
 1 16 -5 4017.42 1078.09 3
 1 16 -5 3838.3 954.601 1
 -1 -16 -5 4419.92 1288.32 2
 -1 16 -5 4085.7 941.715 1
 -1 16 -3 2364.69 689.72 1
 1 16 -3 2647.04 779.452 1
 -1 -16 -3 2477.05 931.247 2
 1 -16 -3 1845.34 744.568 2
 1 16 -1 38177.3 2884.34 1
 -1 16 -1 40914.8 2943.41 1
 1 -16 -1 48168.2 4345.85 2
 -1 -16 -1 48673.7 4233.63 2
 1 -16 1 52021.9 4336.34 2
 -1 -16 1 43457.8 3889.78 2
 -1 16 1 37267.2 2841.99 1
 -1 -16 1 58041.5 5387.86 6
 1 -16 1 49008 4980.78 6
 1 16 1 39075 2923.05 1
 -1 -16 3 991.417 521.485 6
 -1 16 3 1569.41 633.272 1
 1 -16 3 2192.08 959.561 6
 1 16 3 2356.1 708.838 1
 -1 16 5 3497.8 876.762 1
 1 16 5 3604.41 910.898 1
 1 -16 5 5387.1 1395.62 6
 -1 -16 5 5704.28 1463.49 6
 -1 -16 7 11600.4 1935.93 6
 1 16 7 12442.9 1698.54 1
 1 -16 7 9903.87 1775.31 6
 -1 16 7 13045.5 1705.2 1
 1 16 9 1413.74 575.651 1
 -1 -16 9 1212.23 551.143 6
 1 -16 9 1724.94 673.797 6
 -1 16 9 1756.75 679.776 1
 -1 16 11 1090.75 583.729 1
 1 -16 11 1297.33 511.313 6
 -1 -16 11 1591.86 709.699 6
 1 16 11 1936.03 755.61 1
 -1 -16 13 511.481 428.426 6
 -1 16 13 182.255 204.205 1
 1 16 13 510.6 427.665 1
 1 -16 13 501.532 440.723 6
 -1 16 15 21053.2 2879.32 4
 1 -16 15 19837.6 2456.6 6
 -1 -16 15 18464.3 2433.76 6
 1 16 15 20570.5 2752.54 4
 -1 16 15 16634.7 2187.61 1
 1 16 15 16284.8 2135.66 1
 1 16 17 768.928 556.576 4
 1 16 17 2161.02 746.645 1
 -1 -16 17 1876.36 820.951 6
 -1 16 17 2173.75 859.392 1
 -1 16 17 2209.26 1054.03 4
 1 -16 17 2249.8 892.016 6
 -1 17 -20 -58.3176 239.621 3
 -1 17 -18 4579.82 1364.76 3
 -1 17 -18 4738.42 1221.3 5
 1 17 -18 4957.51 1413.8 3
 1 17 -18 7124.15 1461.46 5
 1 17 -16 2535.28 848.509 5
 1 -17 -16 1672.16 734.861 2
 -1 17 -16 1848.22 713.227 5
 -1 17 -16 1487.43 623.61 3
 -1 -17 -16 2736.69 1207.73 2
 1 17 -16 1043.99 682.926 3
 1 17 -14 4382.97 1110.88 5
 -1 17 -14 3946.01 941.266 5
 1 17 -14 3097.59 1035.12 3
 -1 17 -14 3917.97 1188.41 3
 1 -17 -14 2485.83 1134.15 2
 -1 -17 -14 1867.31 860.082 2
 -1 17 -12 -273.607 322.805 5
 -1 -17 -12 160.428 357.396 2
 -1 17 -12 -5.07691 288.191 3
 1 -17 -12 348.868 622.622 2
 1 17 -12 -271.831 214.975 3
 1 17 -12 26.7869 179.562 5
 -1 17 -10 3218.56 759.32 5
 -1 17 -10 4442.36 1224.92 3
 1 17 -10 4477.46 974.584 5
 -1 -17 -10 3633.24 1214.61 2
 1 -17 -10 3275.12 1118.64 2
 1 17 -10 6122.16 1394.82 3
 -1 -17 -8 852.536 595.972 2
 1 -17 -8 1219.26 865.303 2
 1 17 -8 1052.87 582.873 3
 1 17 -8 794.255 450.117 1
 -1 17 -8 1465.63 705.394 3
 -1 17 -8 744.428 326.833 5
 -1 17 -8 1633.56 613.471 1
 1 17 -8 643.474 306.204 5
 1 -17 -6 4713.04 1460.82 2
 1 17 -6 3880.75 1131.25 3
 -1 17 -6 3056.69 893.426 1
 -1 17 -6 3209 1034.85 3
 1 17 -6 1745.86 659.144 1
 -1 -17 -6 2478.59 973.809 2
 1 -17 -4 108.581 254.15 2
 1 17 -4 794.098 505.477 1
 -1 -17 -4 -152.24 629.363 2
 -1 17 -4 2.06465 403.862 1
 -1 17 -2 29279.4 2630.72 1
 -1 -17 -2 37214.4 3833.93 2
 1 -17 -2 42135.4 4220.73 2
 1 17 -2 29258.9 2637.74 1
 -1 17 0 18693.6 2108.49 1
 1 17 0 18902.7 2127.08 1
 -1 -17 0 24508.1 3023.48 2
 1 -17 0 25496.2 3141.17 2
 1 -17 2 35361.9 4144.94 6
 -1 -17 2 30888.7 3288.64 2
 -1 17 2 29839.9 2631.96 1
 1 -17 2 31628.2 3352.96 2
 -1 -17 2 36152.5 4186.65 6
 1 17 2 31458.4 2728.49 1
 1 -17 4 264.51 459.128 6
 -1 -17 4 235.117 288.37 6
 -1 17 4 1023.42 642.848 1
 1 17 4 -154.204 359.727 1
 1 -17 6 2409.04 924.599 6
 -1 17 6 3067.29 902.121 1
 1 17 6 1916.21 793.951 1
 -1 -17 6 2303.92 932.168 6
 -1 -17 8 198.008 248.939 6
 1 17 8 2374.59 769.447 1
 1 -17 8 729.537 442.18 6
 -1 17 8 1657.95 780.396 1
 -1 -17 10 4815.09 1217.13 6
 -1 17 10 7829.27 1491.22 1
 1 -17 10 4651.26 1205.35 6
 1 17 10 5933 1339.73 1
 -1 -17 12 138.691 205.953 6
 1 17 12 135.413 232.951 1
 1 -17 12 32.2137 262.215 6
 1 17 14 4213.52 1060.99 1
 1 17 14 2762.85 1025.41 4
 -1 17 14 4008.95 1095.84 1
 -1 -17 14 3780.82 1108.74 6
 1 -17 14 4848 1283.8 6
 1 17 16 678.021 537.764 4
 -1 -17 16 2097.8 951.967 6
 -1 17 16 2687.29 965.32 1
 1 -17 16 2493.95 945.169 6
 -1 17 16 1643.88 1028.98 4
 1 17 16 1762.64 773.672 1
 -1 17 18 4542.47 1175.96 1
 -1 18 -19 -200.768 348.878 3
 1 18 -19 2084 808.653 5
 -1 18 -19 2804.7 998.684 5
 1 18 -17 2410.66 893.289 3
 -1 18 -17 3794.65 1063.13 5
 1 18 -17 3894.42 1210.87 5
 -1 18 -17 3066.44 1201.66 3
 1 18 -15 244.425 424.164 5
 -1 18 -15 -202.83 423.244 3
 -1 -18 -15 192.519 441.19 2
 1 -18 -15 211.226 413.996 2
 -1 18 -15 16.2654 330.52 5
 1 18 -15 311.398 344.869 3
 -1 18 -13 1819.83 762.661 3
 -1 18 -13 2369.44 814.665 5
 1 18 -13 344.742 535.332 3
 -1 -18 -13 560.808 552.967 2
 1 -18 -13 489.173 568.771 2
 1 18 -13 1270.05 497.509 5
 -1 18 -11 1306.01 697.427 3
 -1 18 -11 1764.63 558.122 5
 1 -18 -11 1224.49 785.389 2
 -1 -18 -11 1688.96 905.421 2
 1 18 -11 2608.36 994.302 3
 1 18 -11 2370.09 708.283 5
 -1 18 -9 3437.16 1140.01 3
 1 18 -9 1523.21 514.62 5
 -1 18 -9 1570.72 518.429 5
 1 -18 -9 1093.24 605.535 2
 -1 -18 -9 2225.12 992.932 2
 -1 18 -9 2579.33 851.358 1
 1 18 -9 2562.57 955.409 3
 -1 18 -7 5192.56 1217.17 1
 1 -18 -7 5609.55 1601.16 2
 1 18 -7 5058.74 1129.87 1
 -1 -18 -7 6919.43 1707.76 2
 -1 18 -7 9104.75 1817.62 3
 1 18 -7 4434.68 1238.91 3
 1 18 -5 6939.03 1332.93 1
 -1 -18 -5 8205.26 1834.38 2
 1 18 -5 5286.34 1343 3
 1 -18 -5 6916.19 1637.47 2
 -1 18 -5 7182.69 1364.52 1
 1 -18 -3 5964.83 1521.22 2
 -1 -18 -3 4707.95 1346.35 2
 1 18 -3 2436.4 812.09 1
 -1 18 -3 5244.39 1181.42 1
 -1 -18 -1 11430.6 2096.68 2
 1 -18 -1 11792.4 2258.66 2
 -1 18 -1 7761.28 1412.03 1
 1 18 -1 7114.22 1351.48 1
 1 18 1 8841.5 1519.28 1
 1 -18 1 9222.45 1826.54 2
 -1 -18 1 9443.25 1878.91 2
 -1 18 1 8537.36 1531.56 1
 1 18 3 4159.73 989.837 1
 -1 18 3 4834.06 1094.73 1
 -1 -18 3 5717.79 1437.5 2
 1 -18 3 3838.1 1269.83 6
 -1 -18 3 3811.04 1276.53 6
 1 18 5 5934.33 1250.69 1
 -1 18 5 6606.37 1325.91 1
 -1 -18 5 6620.13 1593.58 6
 1 -18 5 6157.31 1612.13 6
 -1 -18 7 2764.45 1038.6 6
 1 18 7 5465.84 1228.37 1
 1 -18 7 6775.31 1539.12 6
 -1 18 7 6536.11 1345.73 1
 -1 -18 9 2099.97 814.364 6
 1 -18 9 661.087 468.466 6
 1 18 9 3768.33 1045.44 1
 -1 18 9 3289.97 971.686 1
 1 18 11 1118.16 636.025 1
 1 -18 11 1488.75 773.228 6
 -1 -18 11 445.684 319.151 6
 -1 18 11 2452.79 844.8 1
 -1 -18 13 953.255 524.717 6
 1 18 13 41.7606 385.002 1
 1 -18 13 2498.32 967.018 6
 -1 18 13 1686.13 760.642 1
 1 -18 15 93.4925 453.221 6
 -1 18 15 94.4304 207.987 1
 1 18 15 130.264 285.29 1
 -1 -18 15 -21.3476 356.584 6
 -1 18 17 2932.8 1052.18 1
 1 18 17 5007.12 1293.05 1
 1 19 -16 2505.99 1015.63 3
 -1 19 -16 3256.41 1160.14 3
 1 -19 -14 36.6487 767.834 2
 -1 19 -14 -610.302 762.998 3
 -1 -19 -14 330.954 519.349 2
 1 19 -14 -133.035 601.042 3
 1 19 -12 -75.4141 644.477 3
 1 -19 -12 -386.335 723.601 2
 -1 -19 -12 617.778 324.778 2
 -1 19 -12 661.34 538.635 3
 -1 -19 -10 536.061 469.656 2
 -1 19 -10 1843.96 911.474 3
 1 -19 -10 991.664 637.763 2
 1 19 -10 2320.09 961.409 3
 1 -19 -8 643.956 543.064 2
 1 19 -8 999.892 546.709 1
 -1 19 -8 2259.73 997.07 3
 -1 19 -8 2086.65 836.934 1
 -1 -19 -8 1467.16 852.831 2
 1 19 -8 2994.55 1006.58 3
 -1 19 -6 4580.26 1138.27 1
 -1 19 -6 7956.37 1779.23 3
 -1 -19 -6 6207.79 1677.09 2
 1 19 -6 6161.93 1356.87 1
 1 19 -6 7459.84 1692.52 3
 1 -19 -6 5250.14 1660.23 2
 1 19 -4 886.956 582.628 3
 1 -19 -4 -187.198 576.429 2
 -1 19 -4 923.325 359.34 1
 1 19 -4 -27.7366 224.613 1
 -1 -19 -2 7794.9 1789.76 2
 1 -19 -2 8250.01 1920.16 2
 -1 19 -2 5059.06 1143.21 1
 1 19 -2 7318.14 1466.1 1
 1 19 0 6308.88 1308.19 1
 -1 -19 0 10777 2032.1 2
 1 -19 0 10021.5 2012.2 2
 -1 19 0 5550.74 1262.48 1
 1 19 2 8754.09 1586.55 1
 1 -19 2 9140.77 1871.4 2
 -1 19 2 6042.47 1269.61 1
 -1 -19 2 7997.11 1754.37 2
 1 -19 2 8950.76 2146.2 6
 -1 -19 4 711.696 715.095 6
 -1 -19 4 1663.1 763.438 2
 1 -19 4 1587.6 877.296 6
 -1 19 4 265.476 444.339 1
 1 19 4 1200.99 651.405 1
 -1 -19 6 5569.75 1460.06 6
 1 19 6 5519.58 1298.59 1
 1 -19 6 4913.91 1389.51 6
 -1 19 6 6241.5 1351.87 1
 -1 -19 8 1334.5 659.047 6
 -1 19 8 1309.72 563.11 1
 1 -19 8 236.554 393.651 6
 1 19 8 2088.88 806.531 1
 1 19 10 420.011 466.764 1
 -1 19 10 1071.89 630.125 1
 -1 -19 10 1539.11 763.017 6
 1 -19 10 2016.81 805.961 6
 -1 -19 12 144.868 329.516 6
 -1 19 12 -526.156 556.339 1
 1 -19 12 -371.846 648.798 6
 1 19 12 -493.036 350.893 1
 1 -19 14 -105.403 503.423 6
 1 19 14 459.775 322.033 4
 1 19 14 -425.251 406.432 1
 -1 -19 14 -257.279 540.8 6
 -1 19 14 214.113 463.897 1
 -1 19 16 2822.15 1027.43 1
 1 19 16 4596.25 1272.79 1
 -1 19 18 4898.05 1351.92 1
 1 20 -15 693.096 627.407 3
 -1 20 -15 7.78497 504.158 3
 -1 20 -13 527.829 483.615 3
 1 20 -13 -664.455 755.778 3
 1 -20 -13 -272.49 432.456 2
 -1 -20 -11 2112.54 1099.17 2
 1 20 -11 3798.44 1212.5 3
 1 -20 -11 1767.92 890.83 2
 -1 20 -11 1957.83 908.389 3
 -1 -20 -9 -366.06 606.934 2
 -1 20 -9 138.659 282.765 3
 1 20 -9 -244.894 604.381 3
 -1 20 -9 778.726 551.486 1
 1 -20 -9 -474.197 488.805 2
 -1 -20 -7 11740.5 2295.75 2
 1 20 -7 9901.98 1771.41 1
 1 20 -7 14154.3 2361.65 3
 1 -20 -7 10937.5 2389.79 2
 -1 20 -7 11530.4 1877.63 1
 -1 20 -7 12017 2206.43 3
 1 20 -5 8896.61 1723.29 1
 -1 -20 -5 9105.79 1999.32 2
 -1 20 -5 10063.1 2090.09 3
 1 -20 -5 9474.72 2160.62 2
 1 20 -5 10108.6 1955.58 3
 -1 20 -5 8459.94 1594.44 1
 1 20 -3 3560.75 994.21 1
 1 -20 -3 5439.89 1473.4 2
 -1 -20 -3 4055.39 1222.89 2
 -1 20 -3 3350.38 959.741 1
 1 -20 -1 402.081 463.754 2
 -1 20 -1 162.973 231.213 1
 1 20 -1 -487.868 402.582 1
 -1 -20 -1 107.259 299.669 2
 1 -20 1 -376.045 378.085 2
 1 20 1 94.3683 270.125 1
 -1 20 1 -69.3968 415.579 1
 -1 -20 1 -285.044 322.983 2
 1 -20 3 4050.62 1568.38 6
 1 -20 3 4120.44 1164.04 2
 -1 -20 3 2563.93 957.362 2
 -1 20 3 2590.2 896.657 1
 -1 -20 3 3121.35 1294.45 6
 1 20 3 4239.61 1073.96 1
 -1 20 5 9623.08 1678.6 1
 -1 -20 5 4971.12 1573.04 6
 1 20 5 7808.73 1524 1
 1 -20 5 9168.93 1981.57 6
 -1 20 7 10006.3 1772.51 1
 1 20 7 9287.08 1729.84 1
 -1 -20 7 6666.94 1731.71 6
 1 -20 7 7471.19 1740.91 6
 1 -20 9 130.775 303.532 6
 -1 -20 9 -543.773 553.135 6
 1 20 9 -25.1795 371.715 1
 -1 20 9 425.783 540.808 1
 -1 20 11 3299.77 965.269 1
 1 -20 11 2157.05 865.13 6
 1 20 11 1363.97 651.811 1
 -1 -20 11 2686.17 1016.62 6
 1 -20 13 485.557 530.086 6
 -1 -20 13 465.288 432.844 6
 1 20 13 264.126 241.679 1
 -1 20 13 1421.21 729.36 1
 1 20 15 145.714 405.898 1
 -1 20 15 554.492 496.537 1
 -1 20 17 4237.97 1263.78 1
 1 20 17 1632.03 904.52 1
 -1 21 -14 1576.9 844.657 3
 1 21 -12 1463.4 760.424 3
 1 -21 -12 -461.06 550.402 2
 -1 -21 -12 -460.813 828.854 2
 -1 21 -12 -237.741 296.93 3
 -1 -21 -10 2349.78 1112.36 2
 -1 21 -10 1956.61 1120.89 3
 1 21 -10 673.671 774.312 3
 1 -21 -10 2230.49 1008.29 2
 1 -21 -8 1296.48 799.701 2
 1 21 -8 -35.988 304.73 3
 -1 -21 -8 591.615 464.337 2
 -1 21 -8 573.74 702.641 3
 -1 21 -8 379.066 474.833 1
 1 21 -6 5957.15 1646.24 3
 1 21 -6 3851.53 1119.68 1
 -1 -21 -6 5407.72 1618.51 2
 1 -21 -6 3709.31 1400.56 2
 -1 21 -6 2744.28 972.037 1
 -1 21 -6 6376.77 1686.59 3
 1 21 -4 1255.51 643.09 1
 -1 21 -4 3015.21 1040.83 1
 1 21 -4 3581.01 1219.57 3
 -1 -21 -4 3550.58 1115.59 2
 1 -21 -4 2208.87 1041.23 2
 1 -21 -2 11403.5 2238.19 2
 1 21 -2 9369.02 1797.14 1
 -1 21 -2 7389.36 1546.73 1
 -1 -21 -2 10343.3 2124.77 2
 1 -21 0 2494.77 1045.9 2
 -1 21 0 2766.02 1023.97 1
 -1 -21 0 4053.95 1347.01 2
 1 21 0 2831.62 995.652 1
 -1 21 2 8576.78 1725.32 1
 -1 -21 2 10632.2 2061.41 2
 1 21 2 8040.4 1626.41 1
 1 -21 2 9936.81 2009.07 2
 1 -21 4 2557.27 1069.57 2
 1 -21 4 1790.47 885.091 6
 1 21 4 2458.68 913.783 1
 -1 21 4 1631.99 872.989 1
 -1 -21 4 2082.82 919.133 2
 -1 -21 4 1384.27 1094.12 6
 1 21 6 4642.38 1238.81 1
 -1 21 6 4442.44 1203.78 1
 -1 -21 6 3405.31 1396.67 6
 1 -21 6 3471.54 1321.04 6
 1 -21 8 -33.7314 437.49 6
 1 21 8 297.351 470.451 1
 -1 -21 8 122.425 320.275 6
 -1 -21 10 1574.43 857.169 6
 1 -21 10 2232.11 982.274 6
 1 21 10 571.583 595.465 1
 -1 21 10 1429.29 684.375 1
 -1 21 12 785.807 561.739 1
 1 -21 12 790.827 518.549 6
 -1 -21 12 614.569 628.695 6
 1 21 14 2854.28 1049.91 1
 -1 21 14 3098.39 1136.95 1
 -1 22 -11 2301.75 975.894 3
 1 22 -11 1036.91 637.371 3
 1 -22 -9 1140.17 794.873 2
 -1 22 -9 800.713 941.534 3
 -1 -22 -9 421.982 387.384 2
 -1 22 -9 -441.882 383.904 1
 1 22 -9 -279.571 675.697 3
 -1 -22 -7 1764.87 858.316 2
 1 -22 -7 2874.5 1277.79 2
 -1 22 -7 2613.48 1054.4 3
 -1 22 -7 2229.91 845.637 1
 1 22 -7 3789.33 1149 1
 1 22 -7 3049.69 1249.55 3
 -1 22 -5 5425.7 1307.96 1
 1 22 -5 4409 1222.98 1
 1 -22 -5 6242.22 1766.64 2
 -1 -22 -5 5030.66 1559.9 2
 1 22 -5 5003.27 1524.35 3
 -1 22 -5 5662.95 1570.5 3
 -1 22 -3 -147.373 620.058 1
 -1 -22 -3 -637.38 808.057 2
 1 22 -3 232.345 514.108 3
 1 -22 -3 487.017 451.698 2
 1 22 -3 474.527 435.793 1
 1 22 -1 3209.08 1094.22 1
 -1 -22 -1 2239.17 887.743 2
 1 -22 -1 3178.63 1267.3 2
 -1 22 -1 3504.58 1164.51 1
 -1 -22 1 3565.99 1290.19 2
 -1 22 1 3511.28 1081.28 1
 1 22 1 3577.68 1141.25 1
 1 -22 1 4149.79 1402.6 2
 -1 -22 3 999.437 714.017 2
 1 -22 3 611.545 595.259 2
 1 22 3 -801.773 617.977 1
 -1 22 3 972.378 620.145 1
 1 22 5 4122.47 1164.06 1
 -1 -22 5 6291.42 1861.46 6
 1 -22 5 5328.07 1567.68 6
 -1 22 5 4316.18 1151.18 1
 -1 -22 5 6295.29 1582.59 2
 1 -22 5 4384.91 1295.23 2
 1 -22 7 1927.69 898.369 6
 -1 -22 7 2202.06 1062.18 6
 -1 22 7 2257.03 860.882 1
 1 22 7 2146.04 916.69 1
 -1 22 9 1047.83 596.329 1
 -1 -22 9 960.71 624.196 6
 1 22 9 212.805 557.822 1
 1 -22 9 480.133 557.123 6
 -1 22 11 3065.72 1090.1 1
 1 22 11 1161.68 840.028 1
 -1 23 -8 863.259 544.486 1
 1 -23 -8 285.385 321.725 2
 -1 -23 -8 152.139 375.716 2
 -1 23 -8 1079.9 695.719 3
 1 23 -8 1415.92 896.404 3
 -1 23 -6 1426.06 911.731 3
 1 -23 -6 1069.58 934.745 2
 -1 23 -6 847.341 636.554 1
 -1 -23 -6 1243.82 910.68 2
 1 23 -6 -365.81 353.735 1
 1 23 -6 1012.18 797.37 3
 -1 -23 -4 1060.68 723.887 2
 -1 23 -4 1477.13 905.276 1
 1 -23 -4 -279.31 465.389 2
 1 23 -4 298.605 583.8 1
 -1 23 -4 1901.18 922.52 3
 1 23 -4 539.163 408.133 3
 1 23 -2 4182.53 1265.78 1
 -1 -23 -2 2068.05 983.543 2
 1 -23 -2 2786.08 1223.96 2
 -1 23 -2 1791.39 709.519 1
 -1 -23 0 1478.87 1120.49 2
 1 23 0 1914.98 1003.8 1
 -1 23 0 -125.621 387.979 1
 1 -23 0 1943.65 1148.61 2
 -1 23 2 1573.41 746.661 1
 -1 -23 2 3087.87 1127.94 2
 1 -23 2 1820.31 801.297 2
 1 23 2 2895.76 1008.29 1
 -1 -23 4 705.62 561.236 2
 1 23 4 323.983 348.585 1
 -1 23 4 611.77 539.919 1
 1 -23 4 1158.18 561.559 2
 1 23 6 -408.468 505.507 1
 1 -23 6 90.9065 365.752 6
 1 -23 6 202.719 385.69 2
 -1 -23 6 580.176 454.009 6
 -1 23 6 1178.71 757.502 1
 -1 -23 6 195.014 490.934 2
 -1 23 8 878.291 563.871 1
 -1 -23 8 1419.69 696.659 6
 1 23 8 3.3197 613.657 1
 1 -23 8 640.153 378.167 6
 -1 24 -7 -287.349 422.485 1
 1 24 -5 2836.71 1195.83 3
 -1 24 -5 3281.69 1120.35 1
 -1 -24 -5 2644.17 1167.88 2
 -1 24 -5 3447.41 1433 3
 1 24 -5 2282.9 951.57 1
 1 -24 -5 2711.2 1320.2 2
 -1 -24 -3 3942.52 1384.71 2
 1 -24 -3 5580.81 1754.64 2
 1 24 -3 7512.87 1872.74 3
 1 24 -3 5137.67 1396.02 1
 -1 24 -3 4725.37 1370.35 1
 1 24 -1 3383.1 1146.9 1
 1 -24 -1 3358.09 1305.3 2
 -1 -24 -1 4602.78 1445.95 2
 -1 24 -1 3449.4 1181.38 1
 1 24 1 3033.62 1239.05 1
 1 -24 1 2018.09 1028.84 2
 -1 24 1 4195.5 1323.34 1
 -1 -24 1 4440.82 1488.58 2
 -1 -24 3 7069.4 1740.98 2
 1 24 3 4918.7 1359.76 1
 -1 24 3 7009.5 1646.05 1
 1 -24 3 6235.52 1630.23 2
 -1 -24 5 3258.1 1244.46 2
 -1 24 5 2741.77 960.512 1
 1 -24 5 4529.1 1563.97 6
 1 -24 5 3812.29 1193.11 2
 1 24 5 2674.96 1066.56 1
 1 -24 7 1951.77 787.222 2
 -1 -24 7 564.722 385.517 2
 -1 25 -6 -2.44247 369.718 1
 -1 25 -4 757.849 539.418 1
 1 25 -4 -324.393 568.083 1
 1 25 -2 1996.5 995.954 1
 -1 25 -2 1535.64 906.004 1
 -1 -25 0 6698.44 1747.27 2
 -1 25 0 2957.44 1056.47 1
 1 25 0 3968.72 1242.81 1
 -1 -25 2 581.658 612.123 2
 -2 0 -22 7198.45 1510.51 5
 2 0 -22 5699.28 1412.43 5
 -2 0 -20 2776.4 934.669 5
 2 0 -20 1395.8 636.851 5
 2 0 -18 3884.12 736.886 3
 2 0 -18 2476.79 759.677 5
 -2 0 -18 3113.88 906.383 5
 2 0 -16 37927.2 2129.37 3
 2 0 -16 39764.5 2869.97 5
 -2 0 -16 37361.4 1892.99 3
 -2 0 -16 38088.4 2916.53 5
 2 0 -14 17640.3 1765.43 5
 -2 0 -14 17360.1 1786.39 5
 -2 0 -14 16931.6 1182.18 3
 2 0 -14 15539.9 1279.61 3
 2 0 -12 12598.1 1060.22 3
 -2 0 -12 13784.8 1426.1 5
 2 0 -12 13929.5 1388.58 5
 -2 0 -12 12936.7 934.649 3
 2 0 -10 298.469 145.212 3
 -2 0 -10 335.431 270.594 5
 2 0 -10 166.348 221.124 5
 -2 0 -10 241.891 103.239 3
 2 0 -8 52255.6 2224.93 5
 -2 0 -8 49698.1 2174.16 4
 -2 0 -8 50700.9 2220.54 5
 -2 0 -8 47531.6 1409.3 3
 2 0 -8 47330.3 1704.26 3
 -2 0 -6 58066.4 2012.11 4
 2 0 -6 56773.2 1659.37 3
 2 0 -6 56508.6 1982.53 5
 -2 0 -6 54657.8 1260.37 3
 2 0 -6 56307.2 1676.64 2
 2 0 -6 55452.9 2040.92 7
 -2 0 -6 57236.1 2031.07 5
 2 0 -4 20496.8 1019.68 7
 -2 0 -4 20027.2 968.957 4
 -2 0 -4 20301.6 1002.35 5
 2 0 -4 20841 805.047 2
 -2 0 -4 20488 905.27 2
 2 0 -4 21075.5 992.498 5
 -2 0 -4 18996.7 560.068 3
 2 0 -4 20425.6 844.643 3
 -2 0 4 19365.5 959.64 5
 2 0 4 22066.3 924.885 2
 2 0 4 19582.7 566.724 3
 -2 0 4 21174.1 1009.99 7
 2 0 4 19531.4 925.863 4
 2 0 4 19826.1 831.541 8
 2 0 4 20974.6 1000.25 5
 -2 0 4 21634.4 859.729 3
 -2 0 4 21012.4 810.284 2
 -2 0 6 56132.7 1967.04 7
 2 0 6 56373.1 1282.56 3
 -2 0 6 53134 1758.53 4
 -2 0 6 56680 1658.92 2
 -2 0 6 55237 1938.68 5
 -2 0 6 56134 1632.39 3
 2 0 6 54861.7 1764.56 2
 2 0 6 55399.6 1947.32 5
 2 0 6 57204.8 1880.46 4
 -2 0 8 50695 1770.37 3
 -2 0 8 52425.9 2005.13 4
 2 0 8 53308.9 2080.61 4
 -2 0 8 54667 1915.49 2
 2 0 8 51302.1 1488.11 3
 -2 0 8 50202.5 1353.88 1
 -2 0 10 380.512 123.487 1
 2 0 10 76.4631 210.918 4
 2 0 10 190.113 68.3663 3
 -2 0 10 278.79 240.04 4
 -2 0 12 12756 792.79 1
 -2 0 12 12984.5 1207.19 4
 2 0 12 13812.9 981.144 3
 2 0 12 14146 1295.2 4
 -2 0 14 15314.5 870.591 1
 -2 0 14 16368.9 1476.37 4
 2 0 14 17577.9 1565.91 4
 -2 0 16 35280.2 2322.9 4
 2 0 16 36066.6 2434.81 4
 -2 0 18 3332 727.572 4
 2 0 18 4253.98 857.421 4
 -2 0 20 1962.93 583.034 4
 2 0 20 2608.37 699.259 4
 2 0 22 6978.93 1295.89 4
 -2 0 22 5342.32 1076.13 4
 2 0 24 8616.53 1494.81 4
 2 1 -23 6002.8 1514.67 5
 2 -1 -23 4756.11 1337.54 5
 -2 1 -23 5841.51 1503.42 5
 -2 -1 -23 7360.55 1669.22 5
 2 -1 -21 227.691 363.142 5
 -2 -1 -21 116.128 393.842 5
 -2 1 -21 987.093 588.059 5
 2 1 -21 1497.27 750.776 5
 2 1 -19 6351.97 1287.16 5
 2 -1 -19 5681.19 1220.06 5
 -2 1 -19 5909.53 1277.81 5
 2 1 -19 6239.74 953.119 3
 -2 -1 -19 4819.81 1173.16 5
 -2 1 -19 6172.21 869.937 3
 2 1 -17 21083.4 2230.6 5
 -2 -1 -17 20694.5 2191.4 5
 -2 1 -17 24387.4 2428.49 5
 2 1 -17 22519.7 1745.8 3
 -2 1 -17 23090.9 1555.05 3
 2 -1 -17 24708.6 2347.73 5
 2 -1 -15 4247.47 713.514 3
 -2 1 -15 4977.1 702.751 3
 -2 1 -15 4599.56 994.642 5
 2 -1 -15 5246.96 1039.45 5
 2 1 -15 4671.76 752.09 3
 -2 -1 -15 5172.91 1030.93 5
 2 1 -15 4703.84 934.912 5
 -2 1 -13 18933.9 1216.05 3
 2 -1 -13 21018.4 1420.24 3
 -2 -1 -13 22076.6 1887.9 5
 -2 1 -13 21268.1 1898.93 5
 2 1 -13 21463.9 1463.93 3
 2 1 -13 22922.7 1944.26 5
 2 -1 -13 19279.4 1748.26 5
 -2 1 -11 2041.45 352.173 3
 2 1 -11 1808.35 453.663 5
 -2 -1 -11 2326.87 586.017 5
 2 -1 -11 2270.72 466.993 3
 2 1 -11 2594.77 460.07 3
 2 -1 -11 1880.23 401.127 2
 -2 1 -11 2453.97 610.482 5
 2 -1 -11 1941.71 462.298 5
 -2 -1 -11 1908.5 339.356 3
 2 1 -9 9099.23 990.236 5
 2 -1 -9 8333.6 751.835 3
 -2 -1 -9 9510.36 1036.18 5
 -2 1 -9 8972.58 674.773 3
 -2 1 -9 9797.67 1048.99 5
 -2 -1 -9 9036.38 649.056 3
 2 -1 -9 8608.59 955.592 5
 -2 -1 -9 9209.85 507.996 1
 -2 -1 -9 9737.71 948.118 2
 2 1 -9 9352.23 815.202 3
 2 -1 -9 10589.8 924.438 2
 2 -1 -7 10443 748.339 3
 -2 1 -7 9821.2 613.529 3
 2 -1 -7 11644.2 954.919 5
 -2 -1 -7 11769.9 913.381 2
 -2 -1 -7 10368.6 530.18 1
 -2 1 -7 10758.2 922.841 4
 -2 -1 -7 11053.7 997.816 4
 -2 -1 -7 10252.7 588.189 3
 -2 -1 -7 11566.7 984.397 5
 2 -1 -7 10263.3 794.446 2
 2 1 -7 10703.1 939.749 5
 2 1 -7 10195.8 775.361 3
 -2 1 -7 11977.6 1023.02 5
 -2 -1 -5 8042.2 440.941 1
 -2 1 -5 8203.17 674.019 4
 2 -1 -5 9594.09 719.057 5
 -2 -1 -5 8094.65 704.043 5
 -2 -1 -5 8751.84 675.99 2
 2 -1 -5 7498.63 556.147 3
 2 1 -5 7958.44 686.51 7
 2 1 -5 7531.69 582.874 3
 -2 -1 -5 9316.98 777.636 4
 2 -1 -5 8926.46 775.555 7
 -2 1 -5 8590.61 738.218 5
 -2 1 -5 7814.91 457.477 3
 2 -1 -5 7587.74 582.747 2
 2 1 -5 9135.52 740.783 5
 2 1 -3 39711.8 1256.55 5
 -2 -1 -3 39560.1 1270.98 5
 2 -1 -3 38307.3 1000.29 2
 -2 -1 -3 39152.4 1140.31 2
 2 -1 -3 37862.9 1140.75 5
 2 -1 -3 39957.1 1324.27 7
 2 -1 -3 39976.3 1064.58 3
 -2 -1 -3 38768.7 1261.01 4
 2 1 -3 38577.9 1081.89 3
 -2 1 -3 39469 1271.7 5
 -2 1 -3 39626.3 1174.1 4
 2 1 -3 38666 1163.71 7
 2 1 3 41624.9 1156.09 2
 2 -1 3 38326.9 1222.78 5
 2 -1 3 39730.9 1114.2 4
 -2 1 3 39059.9 1029.65 2
 -2 1 3 40266.4 991.343 1
 2 1 3 39431.6 979.41 1
 -2 1 3 40313.7 1316.78 7
 -2 -1 3 37872.2 1245.03 5
 2 1 3 37178.6 923.286 8
 -2 1 3 37121.3 1129.37 5
 -2 -1 3 38544.9 875.571 4
 -2 -1 3 39080.7 1090.88 3
 2 1 3 39637.3 1261.19 4
 -2 1 3 38233.6 1050.94 3
 -2 -1 3 38187.8 992.687 6
 2 -1 3 36012.5 910.068 3
 -2 -1 3 40568.5 1166.1 7
 2 -1 5 8181.82 635.411 2
 2 -1 5 8397.31 495.174 3
 2 1 5 8057.01 538.999 8
 -2 1 5 8861.29 536.689 1
 2 1 5 9092.79 675.548 2
 -2 -1 5 8248.03 563.671 4
 2 1 5 8697 709.358 5
 -2 -1 5 8864.15 620.014 3
 2 1 5 8796.48 733.013 4
 -2 -1 5 7802.33 688.7 5
 -2 1 5 8367.96 678.582 5
 -2 -1 5 9471.53 714.334 7
 -2 1 5 9362.16 635.849 2
 2 1 5 8460.28 479.097 1
 -2 -1 5 8995.12 589.036 2
 -2 1 5 9282.6 765.249 7
 2 -1 5 9220.08 668.624 4
 -2 1 5 8379.92 588.261 3
 2 -1 5 8410.62 704.335 5
 2 1 5 8677.3 438.141 3
 -2 -1 7 13269.3 881.107 4
 -2 1 7 14028.5 916.94 2
 -2 1 7 12164.7 706.997 1
 2 1 7 13040.1 998.336 5
 2 -1 7 12127 995.705 5
 2 1 7 13178.2 1043.36 4
 -2 -1 7 12721.9 842.418 2
 2 -1 7 13372.9 922.323 2
 2 1 7 13213.4 670.635 3
 2 1 7 12161.3 772.732 8
 -2 1 7 12161.3 805.698 3
 -2 1 7 12484.7 974.652 5
 2 1 7 12631.7 618.229 1
 -2 1 7 12145.1 1014.1 7
 -2 1 7 13213.3 1038.35 4
 2 -1 7 12593.5 713.643 3
 2 1 7 13815.3 967.708 2
 2 -1 7 13905.1 957.024 4
 -2 -1 7 10906.4 948.337 5
 -2 -1 7 13267.7 873.766 3
 -2 -1 7 11835.2 943.992 7
 -2 1 9 8496.72 756.159 3
 2 1 9 8471.04 537.87 1
 -2 -1 9 8172.66 750.828 3
 2 -1 9 8369.79 668.879 3
 2 1 9 7735.83 898.039 4
 2 1 9 8391.31 728.283 8
 -2 -1 9 8704.1 813.072 4
 2 -1 9 9106.87 895.535 4
 -2 1 9 7777.18 622.501 1
 2 1 9 8832.79 645.57 3
 -2 1 9 8893.09 944.696 4
 -2 1 11 2342.57 367.947 1
 2 1 11 2485.32 306.639 1
 -2 -1 11 1770.74 423.891 4
 2 -1 11 1881.92 420.911 4
 -2 -1 11 2036.76 283.603 1
 2 1 11 1912.78 346.198 3
 -2 1 11 2750.73 601.131 4
 2 1 11 3418.58 649.631 4
 2 1 11 1765.06 348.236 8
 2 -1 11 2056.57 367.309 3
 -2 1 13 20144.3 1079.69 1
 2 -1 13 21340.5 1607.32 4
 -2 -1 13 19652.6 920.218 1
 2 1 13 19617.2 838.727 1
 -2 1 13 19767.3 1653.54 4
 2 1 13 19553 1648.83 4
 -2 -1 13 19272.1 1484.75 4
 -2 1 15 2520.23 383.213 1
 -2 -1 15 4572.23 772.893 4
 2 1 15 3222.44 750.126 4
 -2 1 15 3923.83 803.07 4
 2 -1 15 3581.93 730.005 4
 -2 -1 15 2327.1 310.979 1
 2 -1 17 23474.4 1935.14 4
 2 1 17 20763.1 1986.77 4
 -2 1 17 22959.3 2006.44 4
 -2 -1 17 23741.6 1901.03 4
 -2 -1 19 4871.66 912.741 4
 -2 1 19 4491.16 942.213 4
 2 -1 19 5517.44 1033.87 4
 2 1 19 6694.87 1160.15 4
 2 1 21 1684.17 672.781 4
 2 -1 21 1439.72 540.211 4
 -2 1 21 1142.72 518.203 4
 -2 -1 21 1096.03 513.37 4
 -2 1 23 5742.49 1195.51 4
 -2 -1 23 6598.22 1294.79 6
 2 -1 23 7290.39 1295.4 4
 2 1 23 6645.05 1301.67 4
 2 1 25 120.2 340.069 4
 -2 2 -22 1073.43 724.946 5
 2 2 -22 1079.53 661.039 5
 2 -2 -22 834.054 588.158 5
 -2 -2 -22 271.941 289.236 5
 -2 2 -20 1734.44 735.237 5
 2 2 -20 1802.67 571.571 3
 2 2 -20 2341.99 1018.52 5
 2 -2 -20 1359.77 647.916 5
 -2 -2 -20 2311 838.865 5
 -2 -2 -18 5689.23 1236.92 5
 -2 2 -18 5923.5 1227.19 5
 2 2 -18 5393.61 883.423 3
 2 -2 -18 4608.43 1057.1 5
 2 2 -18 4176.98 1009.97 5
 -2 2 -18 4629.52 732.642 3
 2 2 -16 5167.78 1009.69 5
 -2 2 -16 3776.88 640.185 3
 2 -2 -16 4586.67 948.022 5
 -2 2 -16 3197.61 951.429 5
 -2 -2 -16 3708.91 1022.17 5
 2 2 -16 3709.29 742.351 3
 -2 2 -14 6467.74 763.419 3
 -2 -2 -14 5836.21 1060.39 5
 -2 2 -14 7092.6 1158.99 5
 2 2 -14 7842.1 1203.79 5
 2 -2 -14 6579.78 1055.31 5
 2 2 -14 6128.64 825.193 3
 2 -2 -12 34298.9 2194.88 5
 2 -2 -12 34571.6 1990.83 2
 -2 2 -12 35180.7 2331.97 5
 -2 -2 -12 34739.4 2277.88 5
 -2 -2 -12 35276.2 2138.38 2
 2 2 -12 35401 2347.1 5
 -2 2 -12 32646.2 1570.62 3
 2 2 -12 33414.3 1799.95 3
 2 -2 -10 7808.81 767.027 3
 -2 2 -10 6957.55 658.138 3
 2 2 -10 7226.1 782.718 3
 2 -2 -10 8002.33 865.339 2
 -2 -2 -10 8667.89 1052.36 5
 -2 2 -10 7521 978.007 5
 2 2 -10 9835.22 1104.26 5
 -2 -2 -10 7715.5 895.482 2
 -2 -2 -10 7166.27 550.639 1
 2 -2 -10 6770.35 888.022 5
 2 -2 -8 52497.7 1792.49 3
 -2 2 -8 56469.1 2359.95 5
 -2 -2 -8 53017.2 2109.82 2
 2 2 -8 54295.3 1905.79 3
 -2 -2 -8 52201.2 1480.46 1
 -2 2 -8 52598.6 1633.81 3
 -2 -2 -8 53555.6 2262.72 5
 2 -2 -8 53442.8 2005.99 2
 2 2 -8 60993.8 2446.29 5
 -2 2 -8 55353.5 2208.9 4
 2 -2 -8 54495.2 2192.73 5
 2 -2 -6 52957.1 1838.18 5
 -2 2 -6 54027.2 2015.9 5
 2 -2 -6 52479.7 1727.36 2
 -2 -2 -6 58323.1 1952.63 2
 2 2 -6 53816.5 1716.75 3
 -2 2 -6 54230 1863.87 4
 2 2 -6 62084.4 2212.42 5
 -2 2 -6 49830.1 1418.67 3
 -2 -2 -6 49627 1365.8 1
 2 -2 -6 54490.8 2156.49 7
 -2 -2 -6 55172.7 1977.76 5
 2 2 -6 55021.3 1673.62 4
 2 -2 -4 6135.63 605.651 7
 2 -2 -4 5844.94 488.218 2
 -2 -2 -4 5825.24 400.872 8
 -2 -2 -4 6198.34 537.875 2
 -2 -2 -4 6363.25 580.207 5
 -2 -2 -4 6098.8 465.825 1
 2 2 -4 6959.52 608.879 5
 2 2 -4 6333.02 407.791 4
 2 2 -4 6433.95 525.088 7
 2 -2 -4 6082.26 508.176 5
 2 -2 -4 6346.73 473.292 1
 -2 2 -4 5474.24 442.03 3
 -2 2 -4 6020.35 521.755 4
 -2 2 -4 5298.3 511.324 5
 2 2 -4 5514.34 496.247 3
 -2 2 -2 3010.34 302.119 5
 -2 -2 -2 3187.03 320.886 2
 2 -2 -2 3109.22 344.803 7
 2 2 2 4197.83 389.869 1
 -2 -2 2 5557.6 483.038 6
 2 2 2 2553.72 207.904 8
 -2 -2 2 3530.31 348.861 3
 -2 2 2 3113.88 352.426 2
 -2 -2 2 5506.49 363.825 7
 2 -2 2 2864.65 285.425 4
 2 -2 2 2522.8 209.047 1
 -2 2 2 2753.09 247.744 5
 -2 2 2 2299.98 271.525 1
 -2 -2 4 6256.13 513.986 3
 2 2 4 6327 379.224 8
 2 -2 4 6558.34 571.537 5
 -2 2 4 6173.17 510.955 2
 -2 2 4 6447.3 611.662 7
 -2 -2 4 7026.7 610.396 5
 2 -2 4 5989.88 467.852 4
 -2 -2 4 6355.42 369.557 4
 2 2 4 6619.4 628.364 4
 -2 -2 4 7054.47 531.763 7
 2 2 4 6260.54 485.926 1
 -2 2 4 6234.05 507.213 5
 2 2 4 6531.64 542.513 2
 -2 2 4 6441.16 491.479 1
 -2 2 4 6392.82 493.161 3
 -2 -2 4 6534.76 513.533 6
 2 2 6 49111 1314.42 8
 -2 -2 6 53251.8 1703.57 3
 -2 2 6 52263.1 1700.9 2
 2 2 6 53016 2078.07 4
 2 2 6 51443.5 1846.88 5
 2 2 6 50435 1416.13 1
 -2 2 6 52989.5 2055.12 7
 -2 -2 6 52854.6 1451.08 4
 -2 2 6 51262.4 1797.12 5
 2 2 6 48557.5 1215.82 3
 2 -2 6 48630.3 1480.81 3
 -2 2 6 50762.9 1583.8 3
 -2 2 6 49683.9 1495.22 1
 2 -2 6 52158.6 1657.56 4
 -2 -2 6 54593.3 2048.58 5
 2 2 6 54173.5 1836.15 2
 -2 -2 6 59887.3 1903.79 7
 2 -2 6 51112.3 1904.29 5
 -2 -2 8 58245.6 2168.34 7
 -2 -2 8 55703 1938.12 3
 2 2 8 54432.4 1626.82 8
 -2 -2 8 53379.5 1883.88 2
 2 2 8 54797 2357.96 4
 2 -2 8 52469.9 1697.79 3
 -2 2 8 53240.6 1674.62 1
 2 2 8 52251.8 1493.31 3
 -2 2 8 57699 2043.72 2
 2 2 8 52647 1540.18 1
 -2 -2 8 54325.9 1779.43 4
 -2 2 8 56369.5 1857.21 3
 2 -2 8 55210.1 1974.18 4
 2 2 10 7273.2 955.266 4
 -2 2 10 6560.92 636.141 1
 2 -2 10 6885.72 778.842 4
 2 2 10 7315.48 600.527 1
 -2 -2 10 7450.05 763.763 4
 -2 2 10 6789.64 929.923 4
 2 2 10 6891.37 658.043 8
 2 -2 10 6885.77 685.442 3
 2 2 10 7001.58 620.168 3
 -2 2 12 34219.4 1510.76 1
 2 -2 12 32851.9 1869.65 4
 -2 -2 12 32206 1095.74 1
 2 2 12 32290.5 1579.33 8
 2 2 12 34290.6 2215.04 4
 2 2 12 33423.5 1343.45 1
 2 2 12 35100.9 1547.52 3
 -2 -2 12 34850.5 1818.15 4
 -2 2 12 32334.5 2156.74 4
 -2 -2 14 5479.27 775.435 4
 2 -2 14 6252.5 899.456 4
 2 2 14 6373.3 585.485 1
 -2 2 14 5125.4 915.297 4
 -2 2 14 5765.73 644.097 1
 -2 -2 14 5415.19 446.175 1
 2 2 14 7278.13 1092.68 4
 2 2 16 3798.13 835.603 4
 -2 2 16 4349.2 907.509 4
 -2 2 16 2037.56 384.613 1
 2 -2 16 5057.82 826.907 4
 -2 -2 16 4554.48 807.315 4
 2 -2 18 4608.27 859.384 4
 2 2 18 4373.76 924.552 4
 -2 2 18 5400.95 1062.75 4
 -2 -2 18 4489.67 835.974 4
 2 -2 20 2109.45 644.758 4
 -2 2 20 1660.12 631.698 4
 2 2 20 1009.63 444.091 4
 -2 -2 20 2330.34 610.258 4
 2 2 22 677.744 542.222 4
 -2 -2 22 1515.23 598.931 6
 -2 -2 22 518.217 347.8 4
 -2 2 22 898.042 376.02 4
 2 -2 22 1172.04 480.492 4
 2 -2 24 4191.44 954.808 4
 -2 2 24 3280.55 993.882 4
 2 2 24 2865.98 957.667 4
 -2 -2 24 3572.72 1001.31 6
 -2 -3 -23 1812.93 652.547 5
 -2 3 -23 3770.21 1196.68 5
 2 -3 -23 1676.36 776.215 5
 2 3 -23 2300.61 880.648 5
 2 3 -21 2068.57 830.666 5
 -2 3 -21 1771.84 704.217 5
 -2 -3 -21 539.136 309.505 5
 2 3 -21 1483.77 480.138 3
 2 -3 -21 1661.74 787.156 5
 -2 -3 -19 385.82 489.177 5
 2 3 -19 68.1676 468.536 5
 -2 3 -19 233.944 275.064 3
 2 -3 -19 257.672 231.356 5
 2 3 -19 -130.046 302.928 3
 -2 3 -19 36.2258 366.922 5
 -2 3 -17 1597.04 675.686 5
 -2 -3 -17 863.073 474.783 5
 2 -3 -17 1584.22 642.73 5
 -2 3 -17 1883.2 511.491 3
 2 3 -17 1055.2 395.207 3
 2 3 -17 1169.47 536.376 5
 -2 3 -15 9526.14 1408.43 5
 2 3 -15 7544.84 1229.38 5
 -2 -3 -15 9076.3 1342.15 5
 2 3 -15 7812.6 995.373 3
 2 -3 -15 7373.41 1068.77 2
 2 -3 -15 8337.97 1248.15 5
 -2 -3 -15 8142.53 1145.17 2
 -2 3 -15 9518.82 998.687 3
 -2 3 -13 14195.9 1116.76 3
 -2 -3 -13 16217.9 1524.89 2
 -2 -3 -13 16287.3 1628.88 5
 -2 3 -13 16315.2 1711.9 5
 2 -3 -13 16489.9 1479.25 2
 2 3 -13 14412.1 1249.88 3
 2 -3 -13 15784.3 1552.15 5
 2 3 -13 17729 1720.17 5
 -2 3 -11 880.89 347.298 5
 -2 -3 -11 707.854 182.159 1
 -2 -3 -11 690.813 342.83 2
 2 -3 -11 1008.87 408.186 5
 2 3 -11 746.353 354.404 5
 2 3 -11 727.411 306.216 3
 2 -3 -11 697.188 293.347 2
 -2 -3 -11 567.031 351.296 5
 -2 3 -11 713.716 235.346 3
 -2 -3 -9 5222.59 729.438 2
 -2 -3 -9 4693.3 717.583 5
 2 3 -9 5413.41 670.576 4
 2 -3 -9 4663.62 687.698 5
 -2 3 -9 5152.16 789.286 5
 -2 -3 -9 5010.8 537.243 1
 -2 3 -9 4484.72 533.762 3
 2 3 -9 4859.8 747.952 5
 2 -3 -9 5143.24 677.475 2
 2 3 -9 5245.92 659.419 3
 2 3 -7 20936.5 1353.73 5
 -2 3 -7 19114.3 1034.01 3
 2 3 -7 19046.7 1144.1 3
 -2 -3 -7 19781.5 1262.2 5
 -2 3 -7 21167.2 1258.86 4
 2 -3 -7 20509.9 1042.59 1
 -2 3 -7 19890.8 1332.14 5
 2 3 -7 18571.7 1027.71 4
 -2 -3 -7 19270.7 999.471 1
 2 -3 -7 20220.5 1216.47 5
 -2 -3 -7 20072.2 1261.1 2
 2 -3 -7 20593.6 1221.13 2
 -2 3 -5 29813.5 821.114 1
 2 -3 -5 30307.4 1212.03 1
 2 -3 -5 31528.1 1351.83 2
 2 3 -5 33128.5 1481.97 5
 2 -3 -5 31279.8 1251.12 5
 -2 -3 -5 31423.6 1235.6 1
 -2 3 -5 32408 1309.55 3
 -2 -3 -5 32086.6 1379.13 5
 -2 3 -5 32802.2 1323.88 4
 2 -3 -5 30540.9 1538.92 7
 2 3 -5 31242.7 1018.21 4
 -2 3 -5 31926.6 1437.69 5
 -2 -3 -5 31285.5 1391.43 2
 -2 -3 -5 30997.3 959.926 8
 2 3 -5 33216.6 1380.07 3
 -2 -3 -3 25554.4 1119.17 2
 2 -3 -3 25914.1 1207.85 2
 2 3 -3 27495.4 1171.57 3
 -2 3 -3 26464.7 1056.62 4
 2 -3 -3 25286.4 845.518 5
 -2 3 -3 24825.3 797.041 1
 2 3 -3 24754.3 1089.35 5
 -2 -3 -3 25332.7 1085.81 1
 2 3 -3 25570.7 1160.97 6
 -2 3 -3 25557.9 1025.91 5
 2 -3 -3 24962.7 1029.27 1
 2 3 -3 25918.6 820.82 7
 -2 -3 -3 24552.7 724.607 8
 2 -3 -3 26462.7 1184.72 7
 -2 3 -1 5320.26 329.809 5
 2 -3 -1 5098.24 414.795 7
 2 -3 -1 5474.33 809.708 2
 2 -3 -1 6016.31 469.147 1
 2 3 -1 5069.25 499.038 3
 -2 3 -1 5230 461.039 6
 -2 3 -1 5479.4 412.915 1
 2 3 -1 5192.03 480.174 1
 2 3 -1 4428.8 757.098 6
 -2 -3 -1 4827.31 508.013 2
 -2 -3 -1 5247.69 499.511 1
 2 -3 1 4907.96 445.057 6
 2 -3 1 5273.31 457.666 7
 -2 3 1 4444.55 788.86 6
 2 3 1 5159.24 532.363 2
 -2 3 1 5578.65 453.226 1
 2 -3 1 5117.8 387.494 1
 2 3 1 5502.82 492.328 1
 -2 -3 1 4376.46 716.048 6
 -2 -3 1 5939.42 510.492 1
 -2 3 3 26064.2 1062.41 1
 -2 -3 3 23930.6 1118.55 6
 2 3 3 24896.9 1077.29 2
 -2 -3 3 24679.1 1078.13 5
 -2 -3 3 22609.1 946.81 1
 2 -3 3 23520.9 965.112 6
 -2 3 3 23801.3 819.65 5
 -2 -3 3 25080 798.703 7
 2 3 3 23965.4 664.922 8
 -2 -3 3 24813.6 1109.77 3
 -2 3 3 25925.2 1182.27 2
 2 -3 3 23459.7 748.446 1
 -2 3 3 24005.2 1134.39 7
 2 -3 3 23735.9 929.273 4
 2 3 3 23896.4 1047.14 1
 2 -3 3 23771.5 985.125 5
 -2 -3 5 29204.9 1400.51 5
 -2 3 5 30226.5 1211.62 3
 2 -3 5 29150.3 705.839 1
 2 -3 5 29141.2 1342.14 5
 2 3 5 30146.4 826.305 8
 2 -3 5 31900 1193.69 4
 2 3 5 33429.8 1397.15 2
 -2 3 5 31400.9 1256.16 1
 -2 -3 5 31815.2 1319.47 6
 -2 3 5 29550.3 1205.85 5
 -2 3 5 33939.4 1395.89 2
 -2 3 5 29993.7 1496.26 7
 -2 -3 5 31677.4 1189.6 7
 2 3 5 29590.7 1204.39 1
 2 3 5 33287.3 1621.87 4
 -2 -3 5 30595.5 894.583 4
 -2 -3 5 30863.6 1318.99 3
 2 -3 7 19519.1 1117.33 3
 2 3 7 19321.8 888.228 3
 2 -3 7 21334.2 1116.94 4
 -2 3 7 20108.9 1087.23 1
 -2 3 7 19255.4 1190.26 5
 -2 -3 7 20060.1 1160.03 6
 -2 -3 7 20949.3 1184.52 3
 -2 -3 7 20770.2 1168.5 7
 -2 3 7 19607.2 1188.83 2
 -2 -3 7 20517 940.132 4
 2 3 7 20506 824.57 8
 2 3 7 19616 1406.29 4
 -2 3 7 20728.5 1103.01 3
 2 3 7 18864.7 1005.16 1
 2 3 7 20553.2 1272.21 5
 -2 3 9 5689.2 625.188 1
 2 -3 9 5858.76 662.674 3
 2 3 9 4690.3 490.273 3
 2 -3 9 5836.94 670.85 4
 2 3 9 5741.47 833.655 4
 2 3 9 4881.02 536.027 1
 -2 -3 9 5002.12 561.433 4
 -2 -3 9 5282.73 677.542 7
 2 3 9 5010.82 476.01 8
 -2 -3 9 5707.94 695.511 6
 -2 -3 11 388.062 222.588 4
 2 3 11 761.259 240.157 1
 -2 3 11 989.424 433.316 4
 2 -3 11 921.086 323.608 4
 2 3 11 650.793 202.241 8
 2 3 11 852.919 425.192 4
 -2 3 11 795.648 268.788 1
 2 3 11 745.38 206.489 3
 2 3 13 15804.7 1038.8 1
 -2 -3 13 14662.7 746.48 1
 2 3 13 15341.6 1052.89 8
 -2 3 13 17111.5 1169.09 1
 -2 -3 13 14850.9 709.823 1
 2 -3 13 16148.4 1360.71 4
 -2 -3 13 17815.3 1318.38 4
 2 3 13 16042 1650.84 4
 -2 3 13 16605.8 1660.22 4
 2 -3 15 10216.3 1141.54 4
 2 3 15 5851.27 636.112 1
 2 3 15 10069.2 1392.13 4
 -2 3 15 8313.51 1247.41 4
 -2 -3 15 10422.2 1101.83 4
 -2 3 15 8055.69 811.826 1
 2 -3 17 821.974 345.045 4
 -2 -3 17 966.5 448.202 6
 -2 -3 17 1884.16 530.239 4
 2 3 17 2054.35 671.568 4
 -2 3 17 1668.67 611.518 4
 2 3 19 301.682 363.916 4
 2 -3 19 426.083 298.852 4
 -2 3 19 496.835 452.438 4
 -2 -3 19 -27.5774 129.842 4
 -2 -3 19 664.568 395.587 6
 -2 -3 21 2042.96 595.583 4
 -2 3 21 1048.01 360.425 4
 2 -3 21 1957.15 619.531 4
 2 3 21 752.069 214.794 4
 -2 -3 21 1957.69 677.192 6
 2 -3 23 3268.05 921.981 6
 2 3 23 4697.49 1169.37 4
 -2 3 23 2765.91 753.453 4
 -2 -3 23 2428.25 849.454 6
 2 -3 23 3493.88 829.276 4
 2 3 25 18.9154 395.602 4
 -2 3 25 47.053 223.125 4
 2 -4 -22 4588.32 1208.3 5
 -2 4 -22 3638.83 1090.75 5
 -2 -4 -22 3099.61 993.218 5
 2 4 -22 4191.13 1253.89 5
 -2 4 -20 1267.93 460.992 5
 2 4 -20 1375.93 529.086 3
 2 4 -20 1214.29 534.694 5
 2 -4 -20 1211.6 663.895 5
 -2 -4 -20 1505 718.15 5
 -2 4 -18 898.107 644.369 5
 -2 4 -18 256.66 191.34 3
 2 -4 -18 397.975 464.218 5
 2 4 -18 881.262 431.605 3
 -2 -4 -18 818.722 615.38 5
 2 4 -18 324.83 214.142 5
 2 -4 -16 1593.66 499.554 2
 -2 4 -16 2004.08 649.072 5
 2 4 -16 1460.88 622.591 5
 2 4 -16 1558.38 465.18 3
 -2 4 -16 1302.17 323.814 3
 -2 -4 -16 1631.19 529.983 2
 2 -4 -16 809.948 425.178 5
 -2 -4 -16 1250.4 541.208 5
 -2 -4 -14 4000.19 802.917 2
 -2 4 -14 3113.13 736.943 5
 -2 4 -14 2884.23 541.761 3
 2 -4 -14 3087.69 676.246 2
 -2 -4 -14 4745.16 1002.54 5
 2 -4 -14 2906.89 680.044 5
 2 4 -14 2908.36 594.315 3
 2 4 -14 3599.83 761.371 5
 2 4 -12 18925.9 1426.18 3
 -2 -4 -12 17514.7 1580.53 2
 2 -4 -12 18253.9 1580.66 5
 -2 -4 -12 19928.1 1842.66 5
 -2 -4 -12 18396.9 1195.78 1
 -2 4 -12 17808.2 1282.73 3
 2 4 -12 19576.3 1772.97 5
 -2 4 -12 18316.9 1700.03 5
 2 -4 -12 18221.6 1533.6 2
 -2 4 -10 10617.2 933.748 3
 -2 -4 -10 15803 1515.84 5
 2 4 -10 11589.9 1044.79 4
 -2 -4 -10 11526.7 1203.27 2
 -2 4 -10 11533.9 1234.62 5
 2 -4 -10 13178.7 1201.54 5
 -2 -4 -10 11918 944.573 1
 2 -4 -10 12958.9 1164.9 2
 2 4 -10 11469.5 1247.32 5
 2 4 -10 12975.3 1119.77 3
 -2 -4 -8 2883.19 534.256 2
 2 -4 -8 2708.59 512.359 2
 -2 -4 -8 2764.7 436.579 1
 -2 4 -8 2591.52 527.826 5
 -2 -4 -8 2651.82 504.601 5
 -2 4 -8 2412.89 408.967 3
 2 -4 -8 2760.59 429.877 1
 -2 4 -8 2387.68 460.447 4
 2 4 -8 2615.53 470.58 3
 2 4 -8 2778.57 563.188 5
 2 -4 -8 2521.36 462.892 5
 2 4 -8 2572.83 419.45 4
 2 -4 -6 33241.8 1748.71 7
 -2 4 -6 31746.4 1563.46 5
 -2 -4 -6 30741.9 1375.84 1
 -2 -4 -6 28631.1 1413.28 5
 2 -4 -6 30119.1 1512.85 2
 -2 4 -6 28686.7 1436.23 3
 2 4 -6 30882.8 1576.94 5
 -2 -4 -6 31261.8 1587.26 2
 2 4 -6 29715.2 1126.99 4
 2 4 -6 31966.5 1547.74 3
 2 -4 -6 29598 1319.44 5
 -2 4 -6 29073.1 1005.1 1
 -2 4 -6 32076.2 1444.96 4
 2 -4 -6 30254.5 1367.85 1
 2 -4 -4 90925.6 2267.78 1
 2 -4 -4 93892 2540.21 7
 -2 4 -4 81036.1 2469.86 3
 2 4 -4 90974 1713.92 7
 2 4 -4 96178.9 2537.21 3
 -2 -4 -4 88431.9 1450.31 8
 -2 4 -4 91285 2229.66 5
 -2 -4 -4 89601.1 2111.26 5
 -2 -4 -4 92379.8 2504.57 2
 2 4 -4 92154.4 1471.35 4
 -2 4 -4 84271.8 1749.44 1
 2 -4 -4 89002.8 2572.37 2
 2 -4 -4 89418.6 1809.4 5
 -2 4 -4 89840.7 2180.87 4
 2 4 -4 92183.7 2354.26 5
 2 4 -4 91188.3 2492.81 6
 -2 -4 -4 88437.1 2273.19 1
 -2 -4 -2 32481.9 1476.93 2
 -2 4 -2 32564.8 1015.72 5
 -2 4 -2 32390.3 1316.11 6
 2 4 -2 32563.6 1218.61 5
 -2 -4 -2 32950.4 1043.4 8
 2 4 -2 33748.9 1498.44 3
 2 -4 -2 33647.2 793.649 8
 2 4 -2 29898.4 1742.32 6
 2 -4 -2 35097.9 1315.45 1
 2 -4 -2 28317.4 1769.47 2
 -2 4 -2 32959.8 1156.3 1
 2 -4 -2 34578.9 1258.88 7
 -2 4 -2 33661.1 1441.23 4
 -2 -4 -2 34642.9 1405.12 1
 2 4 -2 33263.9 1383.28 1
 -2 -4 0 3510.56 447.374 1
 2 4 0 2791.09 989.563 6
 2 -4 0 3111.58 694.543 6
 2 -4 0 3573.68 337.613 7
 -2 4 0 3263.55 394.547 7
 -2 -4 0 3790.19 727.939 2
 2 4 0 3606.44 452.811 1
 -2 4 0 3751.07 416.121 1
 -2 4 0 3754.46 637.376 6
 -2 -4 0 3421.64 924.097 6
 2 -4 0 3245.58 376.375 1
 -2 -4 2 31753.6 1157.95 5
 -2 4 2 34504.8 1290.31 7
 2 -4 2 31672.7 1002.24 5
 2 -4 2 34707.1 1371.64 6
 -2 -4 2 35213.8 1375.54 1
 2 4 2 34269.5 1387.32 1
 2 -4 2 32585.9 1098.9 1
 -2 4 2 36602 1343.14 1
 2 4 2 34801.9 1497.55 2
 -2 -4 2 29298.1 1708.71 6
 -2 4 2 30860.4 1809.91 2
 2 4 4 91616.3 2387.37 2
 -2 4 4 90422.5 2500.24 7
 -2 4 4 92326 2280.06 1
 -2 -4 4 92030 1673.11 7
 2 -4 4 86541.4 2129.66 5
 -2 -4 4 86142.2 2274.78 5
 2 -4 4 84926.8 1629.17 1
 -2 -4 4 93437.4 2491.46 6
 2 -4 4 87369.2 1991.13 4
 -2 -4 4 83955.4 2066.31 1
 2 -4 4 89402.5 2208.98 6
 -2 4 4 90540.2 2518.13 2
 -2 4 4 88471.1 1780.83 5
 -2 -4 4 87873.3 1417.13 4
 -2 -4 4 92455.7 2482.5 3
 2 4 4 89241.6 1339.53 8
 2 4 4 89445.3 2289.25 1
 -2 -4 6 27861.8 1162.01 1
 -2 -4 6 29223.7 1526.86 5
 -2 4 6 28524.9 1463.6 2
 2 -4 6 28316.1 1226.56 4
 2 4 6 31970.9 1798.96 4
 -2 4 6 30537.1 1658.46 7
 2 4 6 29408.7 1353.38 1
 -2 -4 6 30199.7 1230.92 7
 2 4 6 28924.7 815.538 8
 2 4 6 30100.8 1497.02 2
 -2 -4 6 29321.6 1457.32 3
 2 -4 6 26943.7 818.964 1
 -2 -4 6 28845.3 960.961 4
 -2 4 6 28466.8 1291.57 5
 2 -4 6 30121.3 1412.35 6
 2 -4 6 28612.8 1464.31 5
 -2 -4 6 30762.6 1470.14 6
 -2 4 6 30654.1 1394.63 1
 2 -4 8 2678.08 214.393 1
 2 4 8 3104.29 625.852 4
 2 4 8 3063.77 312.458 8
 2 4 8 2801.37 381.8 3
 -2 -4 8 2768.84 441.28 7
 -2 -4 8 2805.35 366.921 4
 -2 -4 8 3135.27 377.09 1
 -2 4 8 2903.42 483.392 5
 -2 4 8 3011.16 477.103 1
 2 -4 8 3128.9 443.229 4
 2 4 8 3205.52 473.118 1
 -2 4 8 2424.8 415.072 3
 2 -4 8 2599.51 486.053 3
 -2 -4 8 3047.11 520.598 6
 2 -4 10 13005.4 1036.41 4
 -2 -4 10 11437.8 736.313 1
 2 4 10 12498.1 748.664 8
 -2 4 10 11902.2 984.389 1
 2 4 10 10645.1 840.595 3
 -2 -4 10 12047.2 880.723 4
 2 4 10 12189.7 1075 1
 2 4 10 12368.6 1412.36 4
 -2 -4 10 13547.4 1142.64 6
 2 4 12 20675.4 1919.36 4
 -2 4 12 16962.1 1220.44 1
 -2 -4 12 18037.4 1453.22 6
 -2 -4 12 17507.6 885.813 1
 -2 4 12 17811.3 1769.99 4
 -2 -4 12 18414.4 1229.5 4
 2 4 12 17555.8 994.275 8
 2 -4 12 19696.6 1369.08 4
 2 4 12 20014 1328.01 1
 -2 -4 14 3190.55 339.461 1
 -2 4 14 3548.87 586.363 1
 2 -4 14 2983.75 595.349 4
 -2 -4 14 3829.06 714.69 6
 -2 -4 14 2872.99 298.461 1
 2 4 14 2989.14 462.052 8
 -2 -4 14 3343.3 561.508 4
 -2 4 14 2344.42 396.461 8
 -2 4 14 3987.98 855.082 4
 2 4 14 3900.55 583.473 1
 2 4 14 3940.6 896.254 4
 2 -4 16 1416.04 375.337 4
 2 4 16 986.572 300.586 1
 2 4 16 2118.47 666.389 4
 -2 -4 16 1252.09 391.64 4
 -2 4 16 1056.35 459.78 4
 -2 -4 16 1568.47 454.599 6
 -2 4 16 609.27 236.845 1
 -2 -4 18 369.89 237.928 4
 2 4 18 -252.112 258.92 4
 -2 4 18 702.908 516.818 4
 -2 -4 18 223.704 327.185 6
 2 -4 18 524.634 399.293 4
 -2 -4 20 1585.83 622.288 6
 -2 4 20 1388.42 633.866 4
 2 -4 20 1312.74 473.399 4
 -2 -4 20 1205.1 448.337 4
 2 4 20 1642.25 642.336 4
 2 -4 20 1626.75 623.052 6
 2 -4 22 2955.98 765.141 4
 2 4 22 4021.2 1049.89 4
 2 -4 22 3946.54 1040.26 6
 -2 -4 22 3537.71 861.87 6
 -2 4 22 3012.77 897.184 4
 -2 4 24 -331.125 455.774 4
 2 4 24 -250.71 401.807 4
 2 -5 -23 481.172 403.337 5
 -2 -5 -23 213.678 256.403 5
 2 5 -21 7517.9 1567.61 5
 -2 -5 -21 6826.57 1424.16 5
 2 -5 -21 6755.68 1458.02 5
 2 5 -21 5603.25 1032.68 3
 -2 5 -21 7233.32 1499.08 5
 2 -5 -19 7454.22 1384.38 5
 2 5 -19 6427.46 1337.73 5
 -2 5 -19 5872.97 1279.09 5
 -2 5 -19 7959.03 1107.26 3
 -2 -5 -19 9906.96 1652.11 5
 2 5 -19 6861.95 1090.99 3
 2 5 -17 5940.92 1199.46 5
 -2 -5 -17 5364.42 1108.15 5
 2 -5 -17 5407.13 1122.09 5
 2 -5 -17 6248.33 1092.19 2
 2 5 -17 6319.05 1021.17 3
 -2 5 -17 6127.77 911.052 3
 -2 5 -17 4859.16 1076.52 5
 -2 -5 -17 7274.25 1250.34 2
 -2 5 -15 1590.06 574.464 5
 2 5 -15 1133.81 388.418 3
 -2 5 -15 651.159 219.513 3
 -2 -5 -15 1321.17 512.375 5
 2 5 -15 1376.43 535.176 5
 -2 -5 -15 1268.72 482.451 2
 2 -5 -15 1131.86 458.409 2
 2 -5 -15 1163.08 474.203 5
 -2 -5 -13 4365.41 646.028 1
 2 5 -13 4686.94 930.914 5
 -2 -5 -13 4459.13 848.589 5
 -2 5 -13 5194.69 746.854 3
 2 5 -13 4644.26 738.536 3
 2 -5 -13 4056.73 776.536 5
 2 -5 -13 4171.39 796.6 2
 -2 -5 -13 4395.67 871.326 2
 -2 5 -13 4837.08 901.492 5
 -2 -5 -11 5240.4 688.291 1
 2 5 -11 5472.4 914.991 5
 -2 5 -11 4168.15 642.647 3
 -2 -5 -11 3923.42 745.425 2
 2 -5 -11 4831.16 787.435 2
 2 5 -11 5184.85 720.22 4
 -2 5 -11 4906.42 868.04 5
 -2 -5 -11 4653.86 790.086 5
 2 5 -11 5245.34 775.726 3
 2 -5 -11 5123.78 822.237 5
 2 -5 -9 18157.4 1246.32 1
 2 -5 -9 17873.1 1341.4 5
 -2 -5 -9 16881 1323.79 5
 2 5 -9 17176.9 1313.86 3
 -2 5 -9 17743.3 1458.2 5
 -2 -5 -9 16757.3 1179.89 1
 2 5 -9 16143.8 1401.8 5
 -2 -5 -9 18727.6 1458.41 2
 -2 5 -9 15631.3 1186.55 3
 2 5 -9 17003.8 1137 4
 2 -5 -9 17302.6 1389.89 2
 2 5 -7 8173.14 926.779 5
 -2 -5 -7 8147.49 900.914 2
 -2 5 -7 7873.78 787.401 4
 2 5 -7 7878.14 849.342 3
 2 5 -7 8160.12 659.643 4
 -2 -5 -7 7595.97 778.872 1
 2 -5 -7 7487.85 769.277 1
 -2 5 -7 7840.79 833.538 3
 -2 5 -7 7471.43 595.498 1
 -2 5 -7 8280.73 891.557 5
 2 -5 -7 9439.07 970.233 2
 2 -5 -7 7568.53 732.04 5
 -2 -5 -7 6582.3 721.253 5
 2 5 -5 42617.9 1196.48 4
 2 -5 -5 42055.8 2005.45 2
 -2 5 -5 41153.3 1683.79 5
 -2 5 -5 38510.3 1898.95 3
 2 5 -5 43270.2 1923.87 6
 -2 -5 -5 42366.3 1578.38 5
 2 5 -5 44316 1945.39 3
 2 -5 -5 45604.6 1959.85 7
 2 -5 -5 42819.1 1727.8 1
 -2 -5 -5 40027.2 1691.65 1
 -2 -5 -5 42797.2 1925.23 2
 2 -5 -5 42924.4 1396.18 5
 2 5 -5 42312.9 1788.95 5
 -2 5 -5 42566.6 1635.04 4
 -2 -5 -5 40601.8 1027.98 8
 -2 5 -5 39100.3 1366.81 1
 2 -5 -3 12225.7 534.503 5
 -2 5 -3 11153.2 882.681 4
 2 -5 -3 11566.3 445.357 8
 2 5 -3 11695.8 823.875 5
 2 -5 -3 12813.9 882.824 7
 2 -5 -3 12199 882.391 1
 2 5 -3 10815.6 667.199 4
 2 5 -3 11232.6 885.859 1
 -2 -5 -3 11260.1 1002.8 2
 -2 -5 -3 12053.8 913.67 1
 -2 5 -3 12580.4 743.616 5
 -2 5 -3 11368.7 887.267 6
 2 5 -3 12209 1026.15 3
 -2 -5 -3 11329.4 619.414 8
 2 5 -3 10120.5 1030.14 6
 2 -5 -3 10524 1110.89 2
 -2 5 -3 11557.9 757.962 1
 -2 -5 -1 7570.24 719.054 1
 2 -5 -1 8580.84 1402.47 2
 2 -5 -1 6647.63 516.983 7
 -2 5 -1 5007.08 668.194 7
 2 5 -1 7164.89 701.178 1
 -2 5 -1 6358.88 796.815 6
 2 5 -1 5635.71 1154.8 6
 2 -5 -1 6460.38 606.961 1
 2 -5 -1 8493.68 1638.33 6
 -2 5 -1 7429.09 626.992 1
 -2 5 -1 7155.55 392.445 5
 -2 -5 -1 7710.97 969.703 2
 2 -5 1 6250.87 856.508 6
 2 5 1 6816.51 686.376 1
 -2 -5 1 6399.25 523.774 5
 2 -5 1 6250.74 438.785 7
 2 -5 1 6136.91 555.188 1
 -2 5 1 6720.78 637.986 1
 -2 5 1 7220.22 1309.46 6
 2 -5 1 6645.69 385.86 5
 -2 -5 1 6374.79 1244.49 6
 -2 5 1 6978.88 566.908 7
 2 5 1 7005.82 1294.63 6
 2 5 1 7143.84 979.604 2
 -2 -5 1 6442.86 663.434 1
 2 5 3 13409.5 954.142 1
 -2 5 3 12412.3 882.415 7
 2 -5 3 13190.9 777.937 1
 -2 5 3 12967.2 1190.65 2
 -2 -5 3 13136.3 1164.34 6
 -2 5 3 12920.4 919.745 1
 2 -5 3 13251.8 944.406 6
 2 5 3 15059.9 1074.22 2
 -2 5 3 12136.8 519.255 5
 2 -5 3 12897.7 751.456 5
 -2 -5 3 13969.7 860.386 5
 -2 -5 3 13760.2 932.818 1
 -2 -5 5 42381.8 1890.99 3
 2 -5 5 41273.8 1273.68 1
 -2 5 5 42387.6 1376.84 5
 2 5 5 42241.4 1749.43 1
 2 -5 5 45068.5 1769.99 6
 -2 5 5 47687.5 2018.77 2
 2 -5 5 41234.2 1648.76 5
 2 5 5 42537.6 1833.71 2
 -2 -5 5 42296.9 1751.15 5
 -2 -5 5 46814.8 1959.36 6
 2 -5 5 42348.2 1526.19 4
 -2 -5 5 45330 1263.83 7
 2 5 5 41822.5 959.263 8
 -2 5 5 45898.6 1800.3 1
 -2 -5 5 41548.9 1142.75 4
 -2 5 5 44678.2 1960.58 7
 -2 -5 5 42614.6 1613.55 1
 -2 5 7 9212.17 855.824 1
 2 -5 7 7977.78 507.722 1
 -2 -5 7 8553.85 703.498 1
 -2 -5 7 8545.72 573.754 4
 -2 5 7 8109.34 750.738 5
 2 -5 7 7346.43 764.551 6
 2 -5 7 8217.11 715.014 4
 -2 -5 7 8178.95 680.579 7
 2 5 7 8199.44 792.759 1
 2 5 7 8233.66 432.998 8
 -2 -5 7 8408.2 841.987 6
 2 5 7 9433.43 1092.67 4
 -2 -5 9 16285.7 965.601 1
 -2 -5 9 16353.7 1132.12 7
 -2 5 9 16099.5 578.319 8
 2 -5 9 14642.8 587.169 1
 -2 5 9 16819.9 1203.16 1
 2 5 9 17335.1 1191.53 1
 2 5 9 15249.9 994.561 3
 -2 -5 9 18239.4 1324.51 6
 2 -5 9 16304.9 1243.93 6
 2 5 9 15933.6 1523.53 4
 -2 -5 9 17460.5 956.883 4
 2 -5 9 16330.9 1092.16 4
 2 5 9 16258.9 706.273 8
 -2 -5 11 4677.1 552.962 4
 -2 -5 11 4706.65 500.727 1
 2 5 11 4392.71 423.503 8
 -2 -5 11 4364.66 699.245 6
 2 -5 11 3995.53 673.859 6
 2 5 11 4817.42 656.628 1
 -2 5 11 4980.04 411.599 8
 -2 5 11 4937.97 696.343 1
 2 -5 11 4919.08 661.388 4
 2 5 11 3783.16 763.728 4
 -2 -5 13 4247.95 760.915 6
 -2 -5 13 5158.89 678.942 4
 -2 5 13 4121.6 913.448 4
 -2 -5 13 4358.65 447.372 1
 2 5 13 3269.67 567.75 1
 2 -5 13 4101.18 739.207 6
 -2 5 13 4747.12 474.435 8
 2 5 13 4588.56 494.441 8
 2 5 13 3850.61 898.829 4
 2 -5 13 4751.55 721.954 4
 -2 5 13 4714.54 716.549 1
 -2 -5 15 2009.09 460.47 4
 2 5 15 1634.54 555.758 4
 -2 -5 15 1672.19 527.571 6
 2 -5 15 940.021 339.921 6
 2 5 15 1718.24 423.397 1
 2 -5 15 1169.08 342.969 4
 -2 5 15 1559.51 701.552 4
 -2 5 15 1552.98 415.341 1
 -2 -5 17 5482.28 965.49 6
 -2 -5 17 6165.87 866.496 4
 -2 5 17 3849.89 665.847 1
 -2 5 17 4032.87 990.291 4
 2 5 17 6255.1 1231.52 4
 2 -5 17 5354.46 977.499 6
 2 -5 17 5567.37 883.613 4
 2 5 19 5616.86 1225.23 4
 2 -5 19 5956.35 1116.72 6
 -2 -5 19 4276.81 758.395 4
 2 -5 19 7215.94 1074.96 4
 -2 5 19 7559.65 1425.26 4
 -2 -5 19 6684.76 1166.44 6
 -2 5 21 5568.4 1332.52 4
 -2 -5 21 6154.43 1177.05 6
 2 -5 21 5251.47 1097.81 6
 2 5 21 5171.92 1210.08 4
 2 -5 21 5322.09 985.52 4
 2 -5 23 -402.239 344.856 6
 2 5 23 -52.8949 255.548 4
 -2 5 23 -1498.22 704.617 4
 -2 -5 23 -967.87 553.493 6
 2 -6 -24 949.731 621.589 5
 -2 6 -22 969.993 630.143 5
 2 6 -22 -601.739 601.072 5
 2 -6 -22 220.159 415.872 5
 -2 -6 -22 194.65 260.928 5
 -2 -6 -20 543.629 541.354 5
 2 6 -20 141.407 349.474 5
 -2 6 -20 -60.5388 371.065 5
 2 6 -20 45.7929 248.86 3
 2 -6 -20 -239.347 457.853 5
 -2 -6 -18 2578.91 838.347 2
 2 6 -18 3441.3 797.083 3
 -2 -6 -18 2158.37 793.923 5
 2 -6 -18 3532.9 898.916 2
 -2 6 -18 2368.42 860.993 5
 2 6 -18 1771.39 696.846 5
 -2 6 -18 2077.22 617.607 3
 2 -6 -18 2173.33 714.414 5
 -2 -6 -16 7307.35 1258.84 5
 -2 6 -16 9153.43 1534.1 5
 2 6 -16 7641.46 1085.62 3
 2 6 -16 8652.98 1438.12 5
 2 -6 -16 7424.12 1202.74 2
 2 -6 -16 7654.82 1227.2 5
 -2 -6 -16 8445.14 1297.74 2
 -2 6 -16 8621.07 1075.13 3
 2 -6 -14 18313.8 1727.17 5
 2 6 -14 17773.3 1881.1 5
 2 -6 -14 17798.7 1761.83 2
 -2 -6 -14 16389.7 1705.94 2
 -2 6 -14 17790.7 1492.08 3
 -2 -6 -14 15394.1 1628.11 5
 -2 6 -14 21763.5 2099.67 5
 2 6 -14 17939.8 1604.94 3
 2 6 -12 9855.94 1262.9 5
 2 -6 -12 9116.84 1100.26 5
 -2 6 -12 8711.34 1011.85 3
 -2 -6 -12 9034.47 1131.15 5
 -2 -6 -12 8558.19 1167.24 2
 -2 6 -12 10974.7 1383.75 5
 2 -6 -12 9148.82 1172.64 2
 2 6 -12 8323.68 1033.95 3
 2 6 -10 1939.96 567.102 5
 -2 6 -10 2279.73 593.108 5
 2 6 -10 1896.77 405.671 4
 -2 -6 -10 1536.71 467.466 2
 2 -6 -10 1928.97 552.739 2
 -2 -6 -10 1502.82 392.339 5
 2 -6 -10 1668.8 471.436 5
 2 6 -10 1979.3 481.128 3
 -2 6 -10 1445.6 429.815 3
 2 -6 -8 7007.45 918.976 2
 -2 6 -8 6637.94 878.436 3
 2 6 -8 7404.51 922.212 5
 -2 -6 -8 6599.3 785.331 5
 -2 -6 -8 7050.73 804.6 1
 -2 -6 -8 6146.68 858.552 2
 2 -6 -8 7142.61 753.047 5
 2 6 -8 6154.62 813.762 3
 -2 6 -8 9857.59 1020.24 5
 2 6 -8 6230.24 631.975 4
 -2 6 -8 7538.01 824.398 4
 -2 6 -6 28357.5 1572.26 5
 -2 -6 -6 24686.9 1294.27 5
 -2 -6 -6 23683.3 1437.99 1
 -2 -6 -6 23801 803.212 8
 -2 6 -6 27182.1 1320.13 1
 2 6 -6 27123.8 1091.55 4
 2 -6 -6 27843.6 1233.32 5
 2 -6 -6 25476.9 1723.18 2
 2 -6 -6 25577.7 1475.75 1
 -2 -6 -6 27229.7 1690.28 2
 2 6 -6 26119.4 1537.35 5
 -2 6 -6 23924.3 1642.71 3
 -2 6 -6 27810.9 1447.85 4
 2 6 -6 26794.9 1688.97 3
 -2 6 -4 35662.8 1460.73 5
 2 -6 -4 35843.9 1673.08 7
 -2 -6 -4 35962.2 1119.39 8
 2 -6 -4 35109.8 1655.04 1
 2 6 -4 33270 1646.88 1
 2 6 -4 34662.1 1542.9 5
 2 6 -4 33131.1 1197.4 4
 2 -6 -4 35006.5 1059.21 5
 -2 -6 -4 35699.8 1962.94 2
 2 6 -4 31012.2 1863.92 6
 2 -6 -4 32398.4 2039.3 2
 -2 -6 -4 33536.7 1304.51 5
 -2 -6 -4 34832 1697.88 1
 -2 6 -4 35982.3 1675.96 4
 -2 6 -4 39336 1842.72 6
 2 6 -4 32807 1837.17 3
 -2 6 -4 35919.5 1498.64 1
 2 -6 -2 37529.3 2747.21 2
 2 6 -2 37923.2 1763.51 1
 2 6 -2 37126.8 1472.93 5
 -2 -6 -2 36150.1 1699.06 1
 2 -6 -2 37588.9 1440.66 7
 -2 -6 -2 35214 2091.91 2
 2 6 -2 33637.8 2489.05 6
 2 -6 -2 36192.6 1597.46 1
 -2 6 -2 35647.4 1121.05 5
 -2 6 -2 36384.7 1535.11 1
 -2 6 -2 40343.1 1996.01 6
 2 -6 0 8646.31 1575.34 6
 2 6 0 7484.9 1752.91 6
 2 -6 0 6236.26 625.079 1
 -2 -6 0 8205.17 799.955 1
 -2 6 0 7015.91 648.201 7
 -2 -6 0 7506.56 1657.41 6
 -2 -6 0 10525.9 1404.37 2
 -2 6 0 10759.7 1428.65 6
 2 -6 0 7252.91 514.089 7
 2 6 0 7207.55 760.136 1
 -2 6 0 7833.17 722.562 1
 2 -6 2 39552.9 1126.49 7
 -2 6 2 38555.1 1670.03 1
 2 6 2 37806.1 1730.41 1
 -2 6 2 39144.5 2941.24 6
 2 -6 2 34530.2 1097.59 5
 2 -6 2 39829.3 2089.46 6
 -2 -6 2 34417.1 2416.88 6
 2 -6 2 35435.9 1429.81 1
 -2 -6 2 34734.4 1297.17 5
 2 6 2 35917.3 2132.2 2
 -2 6 2 39081.4 1521.42 7
 -2 -6 2 37083.6 1675.78 1
 2 6 4 36108.3 1829.04 2
 -2 -6 4 35991 1607.2 1
 -2 6 4 31980.1 1965.4 2
 -2 6 4 36550.2 1723.84 7
 -2 -6 4 32354.5 1472.81 5
 -2 -6 4 32129.4 839.003 7
 -2 6 4 34703.2 1661.68 1
 -2 6 4 32992.7 1003.84 5
 2 -6 4 34460.8 1345.91 1
 2 6 4 32622.7 1656.39 1
 -2 -6 4 35369.4 1998.07 6
 2 -6 4 37391.3 1764.68 6
 2 -6 4 34311.5 1392.43 5
 -2 -6 6 24504.2 1461.95 5
 -2 6 6 26178.7 1196.6 5
 2 -6 6 26106 1299.32 4
 2 6 6 24203.9 1442.12 1
 -2 -6 6 27572.2 1656.24 6
 -2 -6 6 27184.9 1051.09 7
 2 -6 6 26055.5 1490.72 5
 2 -6 6 24992 1087.8 1
 -2 6 6 24581.4 1469.89 1
 2 -6 6 27608.6 1556.29 6
 -2 -6 6 25073.1 1327.81 1
 -2 6 8 6955.69 719.905 5
 -2 -6 8 6958.66 662.212 7
 2 -6 8 6444.53 668.257 4
 -2 -6 8 6042.07 644.886 1
 -2 -6 8 6355.03 811.908 6
 2 6 8 6813.95 791.99 1
 2 6 8 6133.77 371.878 8
 2 6 8 6865.11 1062.4 4
 2 -6 8 7163.58 839.234 6
 2 -6 8 6560.39 518.945 1
 -2 6 8 7126.4 814.802 1
 -2 -6 8 6593.73 552.671 4
 2 -6 10 2110.84 259.864 1
 2 -6 10 2401.68 509.805 6
 2 6 10 1890.02 522.695 4
 -2 -6 10 1937.1 458.757 6
 2 -6 10 2099.76 408.158 4
 2 6 10 1526.08 405.276 1
 2 6 10 1932.69 238.178 8
 -2 -6 10 2188.37 383.839 1
 -2 6 10 1396.33 383.532 1
 -2 -6 10 2332.15 371.648 4
 -2 -6 10 2006.14 404.054 7
 -2 6 12 7515.11 441.268 8
 2 6 12 8793.15 572.931 8
 -2 -6 12 8629.8 808.346 4
 -2 -6 12 7898.37 666.893 1
 -2 6 12 8770.29 1318.13 4
 2 6 12 9429.77 1339.98 4
 2 -6 12 9493.18 1096.7 6
 -2 6 12 8556.68 958.204 1
 -2 -6 12 8715.47 1056.04 6
 2 6 12 7640.96 895.404 1
 2 -6 12 9519.41 956.177 4
 2 6 14 18134.1 1975.35 4
 2 6 14 16130.3 1346.2 1
 -2 6 14 14697.8 1331.56 1
 2 -6 14 15834.2 1345.69 4
 -2 -6 14 17142.1 1249.77 4
 2 -6 14 18739.9 1669.03 6
 -2 6 14 16362.3 1933.11 4
 -2 -6 14 17310.5 1596.59 6
 -2 -6 16 6766.32 851.303 4
 -2 6 16 5723.77 821.902 1
 2 -6 16 7079.61 1095.55 6
 2 6 16 6777.23 1311.57 4
 -2 6 16 7566.42 1379.63 4
 2 -6 16 8056.97 1017.18 4
 2 6 16 4311.07 702.856 1
 -2 -6 16 7567.19 1120.21 6
 2 -6 18 3288.04 843.138 6
 2 6 18 2076.72 711.997 4
 -2 -6 18 1350.54 400.774 4
 -2 -6 18 2460.33 694.461 6
 -2 6 18 3091.72 936.006 4
 2 -6 18 2791.67 650.752 4
 2 -6 20 521.404 441.389 6
 -2 6 20 148.271 529.383 4
 2 -6 20 210.445 263.259 4
 2 6 20 1006.78 478.007 4
 -2 -6 20 330.616 324.343 6
 2 -6 22 327.933 392.748 6
 2 6 22 -558.894 405.327 4
 -2 -6 22 551.182 557.659 6
 -2 6 22 1298.34 790.701 4
 -2 6 24 -203.081 580.818 4
 -2 -7 -23 1010.81 552.94 5
 2 -7 -23 1459.62 699.658 5
 2 7 -21 1779.06 609.848 3
 2 7 -21 1642.77 685.469 5
 -2 -7 -21 1399.85 834.79 5
 2 -7 -21 3191.2 988.977 2
 2 -7 -21 2302.14 825.782 5
 -2 7 -21 2012.7 755.591 5
 2 -7 -19 548.225 453.847 2
 2 -7 -19 596.617 339.192 5
 -2 -7 -19 1054.14 608.916 2
 2 7 -19 897.482 414.837 3
 -2 -7 -19 579.768 432.437 5
 -2 7 -19 562.685 177.712 3
 -2 7 -19 262.929 354.963 5
 2 7 -19 650.933 442.097 5
 -2 7 -17 361.975 272.361 5
 -2 7 -17 185.859 268.714 3
 -2 -7 -17 -171.72 370.097 5
 2 7 -17 254.664 316.946 5
 -2 -7 -17 99.5937 369.479 2
 2 7 -17 182.252 194.891 3
 2 -7 -17 308.728 193.147 2
 2 -7 -17 76.6808 262.649 5
 -2 -7 -15 8312.11 1255.36 5
 2 7 -15 9795.8 1458.86 5
 -2 -7 -15 9119.55 1367.58 2
 2 -7 -15 8909.95 1312.17 2
 -2 7 -15 11062.5 1507.25 5
 2 -7 -15 9270.81 1297.18 5
 -2 7 -15 8231.49 1118.69 3
 2 7 -15 9010.56 1252.27 3
 -2 -7 -13 633.578 342.757 5
 2 7 -13 725.728 451.793 5
 2 -7 -13 1030.72 428.821 2
 -2 7 -13 571.616 426.085 5
 2 7 -13 1056.95 431.564 3
 -2 7 -13 637.464 301.792 3
 -2 -7 -13 744.649 382.702 2
 2 -7 -13 432.658 270.831 5
 2 -7 -11 6340.94 965.799 2
 -2 7 -11 6810.66 933.152 3
 2 7 -11 7289.94 1076.57 5
 -2 7 -11 7810.87 1082.56 5
 2 7 -11 8576.79 1083.09 3
 -2 -7 -11 7441.4 1096.42 2
 2 -7 -11 7283.92 898.648 5
 -2 -7 -11 7325.56 971.906 5
 2 7 -11 6912.5 836.914 4
 -2 -7 -9 5561.17 859.508 2
 2 7 -9 4878.24 784.519 5
 2 7 -9 4840.35 603.33 4
 -2 7 -9 5303.14 829.006 5
 2 -7 -9 4101.58 745.094 2
 2 -7 -9 5535.19 694.93 5
 2 7 -9 4940.09 809.688 3
 -2 -7 -9 5038.51 739.391 5
 -2 7 -9 4796.67 766.784 3
 2 7 -7 21456.1 1102.54 4
 -2 -7 -7 22551.8 1701.58 2
 2 7 -7 24456.6 1599.37 5
 2 7 -7 20320.7 1585.86 3
 -2 7 -7 22209.5 1394.58 4
 -2 -7 -7 20036 1245.17 5
 -2 7 -7 22166.5 1466.81 5
 2 -7 -7 21510.3 1194.65 5
 -2 -7 -7 18594.6 687.298 8
 -2 7 -7 20279 1235.31 1
 -2 7 -7 19381.5 1589.87 3
 2 -7 -7 21712.9 1731.33 2
 2 -7 -5 10378.9 658.32 5
 -2 7 -5 11510.4 910.556 5
 -2 7 -5 10898.3 903.723 1
 2 7 -5 10663.1 735.16 4
 -2 -7 -5 11067.9 798.087 5
 2 7 -5 11287.2 1198.25 3
 2 -7 -5 10289.3 1223.01 2
 -2 -7 -5 11303.5 623.312 8
 -2 7 -5 10857 982.948 4
 -2 -7 -5 11223 1192.61 2
 2 7 -5 11021.9 970.189 5
 -2 -7 -3 16295.1 1232.64 1
 2 -7 -3 16283.4 1793.35 2
 2 -7 -3 15182.1 1126.02 1
 -2 7 -3 15782.9 875.473 5
 2 7 -3 17620.2 1497.44 3
 2 7 -3 15707 1242.18 1
 2 7 -3 16316 1044.68 5
 -2 7 -3 15627.4 1307.97 6
 2 -7 -3 16271 1063.95 7
 -2 7 -3 15655.6 1084.9 1
 2 7 -3 15539.5 1649.14 6
 -2 -7 -3 15487.7 1460.04 2
 -2 7 -1 33025.4 915.785 5
 2 -7 -1 41235.1 3322.46 2
 2 7 -1 35129 3346.8 6
 2 -7 -1 31393.7 1558.1 1
 2 -7 -1 46823.2 4386.35 6
 -2 7 -1 34532.5 2341.81 6
 2 7 -1 31302.2 795.59 7
 -2 -7 -1 32071.1 1709.29 1
 -2 -7 -1 38493.6 2667.03 2
 -2 7 -1 34103.6 1610.47 1
 2 7 -1 32761.2 1743.38 1
 2 -7 -1 35003.9 1309.25 7
 -2 7 -1 38466.6 1934.41 7
 -2 7 1 36915.3 1460.06 7
 -2 -7 1 32145.3 1215.51 5
 2 -7 1 38032.7 2728.31 6
 2 -7 1 31749.8 895.45 5
 -2 7 1 35434.8 1708.01 1
 -2 7 1 36574.7 3184.48 6
 -2 -7 1 37124.8 1793.11 1
 -2 -7 1 39882.8 3348.03 6
 2 -7 1 35404.1 1052.72 7
 2 7 1 33469.7 1752.49 1
 2 -7 1 32135.6 1515.67 1
 2 -7 3 14937.6 840.88 5
 2 7 3 12823.5 1292.55 2
 -2 -7 3 15020.5 1123.86 1
 2 -7 3 14666.7 983.135 1
 -2 7 3 15332.3 1675.35 2
 -2 -7 3 14464.3 1537.41 6
 -2 7 3 12511.8 1557.85 6
 -2 7 3 17584.8 1158.78 7
 2 -7 3 15705.5 725.677 7
 2 -7 3 15269 1340.26 6
 -2 7 3 14454.9 1136.26 1
 -2 -7 3 13871.9 919.14 5
 2 7 3 13601.6 1123.9 1
 -2 -7 5 10619.8 926.655 1
 2 -7 5 11293.7 1056.05 6
 -2 7 5 10627.1 1019.1 7
 -2 -7 5 10505.6 1152.85 6
 2 -7 5 11510.8 845.911 1
 -2 -7 5 9760.89 497.706 7
 -2 7 5 11924.9 1078.7 1
 -2 -7 5 10526.8 912.011 5
 2 7 5 10850.5 1007.56 1
 2 -7 5 10503.4 855.141 5
 -2 7 5 9466.44 609.711 5
 2 7 7 23728.7 1543.37 1
 -2 7 7 22565.1 1187.73 5
 -2 7 7 24793.2 1581.51 1
 -2 -7 7 24464.9 1388.75 1
 2 -7 7 26001 1622.26 6
 2 -7 7 22672.4 1121.02 1
 2 -7 7 24511.6 1340.78 4
 -2 -7 7 23870.4 1049.42 7
 -2 -7 7 25314.7 1712.8 6
 -2 -7 9 4660 563.691 7
 2 -7 9 4401.45 718.859 6
 2 7 9 5321.43 988.876 4
 2 -7 9 4406.08 580.62 4
 2 7 9 3935.73 293.847 8
 -2 -7 9 4091.42 479.777 4
 -2 -7 9 4155.67 564.095 1
 -2 -7 9 4235.92 733.477 6
 -2 7 9 4687.66 713.61 1
 2 -7 9 4138.72 440.136 1
 2 7 9 4452.24 702.65 1
 2 7 11 7934.35 968.157 1
 -2 -7 11 8188.56 744.947 1
 2 -7 11 8131.63 1035.03 6
 -2 -7 11 8714.08 1064.49 6
 2 -7 11 7770.02 832.603 4
 -2 -7 11 7895.71 722.301 4
 -2 7 11 7598.35 943.955 1
 2 7 11 7843.38 448.91 8
 2 7 11 10260 1410.62 4
 2 -7 11 7431.04 512.965 1
 -2 -7 13 985.474 324.416 4
 -2 7 13 691.301 393.616 4
 2 7 13 1123.01 394.551 1
 2 -7 13 959.605 412.216 6
 2 -7 13 841.102 290.026 4
 -2 7 13 967.764 336.531 1
 -2 -7 13 962.146 444.57 6
 2 7 13 688.278 307.301 4
 2 7 15 8435 1461.27 4
 -2 7 15 7957.48 1454.55 4
 -2 7 15 8278.82 1050.39 1
 -2 -7 15 8861.73 921.048 4
 2 -7 15 9094.14 1239.26 6
 2 -7 15 8872.76 1034.14 4
 -2 -7 15 10342.1 1308.14 6
 2 7 15 8037.18 1007.23 1
 -2 -7 17 429.248 251.881 6
 2 -7 17 48.456 172.817 4
 -2 7 17 -42.5378 132.293 1
 -2 -7 17 193.378 165.925 4
 2 -7 17 948.327 460.458 6
 -2 7 17 -195.659 507.543 4
 2 7 17 41.8821 389.39 4
 2 -7 19 934.549 504.964 6
 2 -7 19 679.863 320.547 4
 2 7 19 1657.82 695.367 4
 -2 7 19 139.795 202.376 4
 -2 -7 19 791.246 395.851 6
 2 7 21 601.232 406.321 4
 2 -7 21 1099.9 558.692 6
 -2 7 21 1213.69 688.209 4
 -2 -7 21 778.586 471.41 6
 -2 -7 23 900.904 540.138 6
 2 7 23 525.743 348.543 4
 -2 7 23 999.043 723.595 4
 2 -8 -24 866.787 443.955 5
 -2 -8 -22 -19.5584 479.545 5
 -2 8 -22 295.538 552.075 5
 2 8 -22 964.05 714.713 5
 2 -8 -22 738.102 559.38 5
 2 -8 -22 499.098 294 2
 2 8 -22 -168.23 263.676 3
 -2 -8 -20 993.896 699.526 2
 2 -8 -20 1134.51 634.405 2
 2 8 -20 408.201 311.005 3
 2 -8 -20 1019.13 465.625 5
 -2 8 -20 800.238 558.156 5
 -2 -8 -20 752.346 490.96 5
 2 8 -20 -58.6313 291.832 5
 -2 8 -20 343.218 228.849 3
 -2 8 -18 596.853 189.297 3
 -2 -8 -18 1365.47 583.518 2
 2 8 -18 505.031 253.086 3
 2 -8 -18 893.228 491.166 5
 -2 -8 -18 950.261 575.855 5
 2 8 -18 1041.7 587.691 5
 -2 8 -18 945.833 535.763 5
 2 -8 -18 1293.8 623.904 2
 -2 8 -16 5172.65 927.811 3
 2 -8 -16 4859.15 968.949 5
 -2 8 -16 4618.01 1007.67 5
 2 8 -16 4461.79 967.352 3
 -2 -8 -16 5018.76 1030.43 5
 2 8 -16 4642.96 1040.91 5
 2 -8 -16 4200.03 1005.15 2
 -2 -8 -16 5157.85 1106.53 2
 -2 8 -14 9057.7 1407.57 5
 -2 -8 -14 8419.34 1352.01 2
 -2 -8 -14 8086.66 1189.22 5
 -2 8 -14 8124.19 1120.19 3
 2 -8 -14 8851.71 1335.31 2
 2 8 -14 10326.1 1450.08 5
 2 8 -14 8443.26 1208.2 3
 2 -8 -14 7815.51 1122.17 5
 2 -8 -12 338.939 306.81 2
 -2 8 -12 -28.3908 164.623 5
 -2 -8 -12 -114.981 193.207 2
 2 8 -12 110.786 141.683 4
 2 8 -12 212.322 270.973 5
 2 -8 -12 301.037 278.208 5
 -2 8 -12 368.038 260.779 3
 -2 -8 -12 324.501 305.147 5
 2 8 -12 -43.0889 135.639 3
 2 -8 -10 7513.67 1127.39 2
 -2 -8 -10 7407.12 1131.44 2
 2 8 -10 7709.43 1055.08 5
 2 8 -10 7348.45 1061.03 3
 2 8 -10 7456.59 811.236 4
 -2 8 -10 7977.67 1053.33 5
 -2 8 -10 6785.95 1009.32 3
 2 -8 -10 7562.54 914.633 5
 -2 -8 -10 6850.23 877.529 5
 2 8 -8 9893.81 1213.48 3
 2 -8 -8 9812.69 906.45 5
 2 -8 -8 9023.03 1251.72 2
 2 8 -8 10027 1105.83 5
 -2 -8 -8 11412.1 1324.58 2
 -2 8 -8 8222.03 1148.59 3
 -2 -8 -8 10471 967.263 5
 -2 8 -8 8094.59 864.654 1
 2 8 -8 8647.15 764.004 4
 -2 8 -8 10142.2 1064.15 5
 -2 -8 -6 2218.19 607.692 2
 -2 8 -6 2526.91 490.495 4
 -2 8 -6 2567.83 496.504 1
 2 8 -6 1905.4 515.492 3
 2 8 -6 2258.42 366.53 4
 2 -8 -6 2123.87 630.497 2
 -2 -8 -6 2706.63 428.615 5
 2 8 -6 2521.07 489.974 5
 -2 8 -6 2205 447.91 5
 2 -8 -6 3009.53 442.223 5
 -2 8 -6 2378.69 617.115 3
 -2 -8 -6 2051.38 271.242 8
 2 -8 -4 2802.77 825.658 2
 2 8 -4 4570.97 801.098 3
 2 -8 -4 4540.17 617.399 7
 2 -8 -4 4308.34 335.922 5
 2 8 -4 4466.79 699.696 1
 -2 -8 -4 4587.72 477.164 5
 -2 8 -4 4998.74 671.65 1
 -2 -8 -4 3375.95 721.9 2
 -2 8 -4 5131.67 563.721 5
 -2 -8 -4 3450.31 457.325 8
 2 -8 -4 3994.53 346.767 8
 2 8 -4 4312.9 579.348 5
 -2 8 -4 3391.29 626.636 4
 -2 8 -2 15680.2 1178.9 1
 2 -8 -2 17294 2227.7 2
 -2 -8 -2 17478.7 1852.73 2
 -2 8 -2 15510.8 779.432 5
 2 -8 -2 16559.5 1030.13 7
 2 8 -2 15044.1 1262.76 1
 -2 8 0 12887.4 944.162 7
 2 -8 0 12860.1 746.382 7
 -2 -8 0 15363.5 1985.66 2
 -2 8 0 15584 1984.83 6
 2 -8 0 16330.8 2361.47 6
 -2 -8 0 17609.7 2701.95 6
 2 8 0 13488.3 712.857 7
 -2 -8 0 12950.3 771.518 5
 -2 8 0 13817.1 1147.29 1
 2 8 0 13732.4 1205.28 1
 2 -8 0 12759.1 1046.16 1
 2 -8 2 16739.9 1768.06 6
 2 -8 2 16340.1 790.533 5
 -2 -8 2 16726.1 955.776 5
 2 8 2 15178 985.198 7
 -2 8 2 17627.6 1133.13 7
 -2 8 2 17381.9 2316.13 6
 -2 -8 2 17757.1 2124.72 6
 2 8 2 16250.3 1296.57 1
 -2 -8 2 18190.8 1313.24 1
 2 -8 2 16769.1 672.511 7
 -2 8 2 17398 1287.79 1
 2 -8 2 15858.1 1126.58 1
 -2 8 4 5044.21 716.768 1
 -2 -8 4 4402.14 637.016 1
 2 -8 4 4243.97 557.412 1
 2 -8 4 3845.88 371.523 7
 -2 -8 4 4553.32 582.45 5
 -2 -8 4 5044.26 926.663 6
 2 -8 4 5574.25 843.472 6
 2 -8 4 4040.97 492.508 5
 2 8 4 4692.67 732.003 1
 2 8 4 4322.41 615.948 7
 -2 8 4 4594.03 657.51 7
 -2 -8 6 2761.15 506.172 1
 -2 8 6 3195.28 624.754 1
 -2 -8 6 2716.64 282.641 7
 2 -8 6 2387.9 522.132 6
 -2 8 6 2855.54 388.703 5
 2 -8 6 2343.36 427.555 5
 -2 -8 6 3346.83 700.777 6
 2 8 6 3404.32 618.412 1
 2 -8 6 3105.7 470.697 1
 2 8 8 8154.36 992.182 1
 -2 -8 8 10013.4 722.472 7
 -2 8 8 9149.76 820.937 5
 -2 -8 8 8891.46 876.917 1
 2 -8 8 9552.67 775.899 1
 2 -8 8 9506.04 1083.32 6
 -2 8 8 11628.2 1250.12 1
 -2 -8 8 9390.75 1132.99 6
 -2 -8 10 6688.57 961.091 6
 2 -8 10 7511.43 635.961 1
 -2 -8 10 6823.96 750.846 1
 2 8 10 6986.04 935.183 1
 2 8 10 8053.18 1263.99 4
 -2 -8 10 7967.68 718.659 4
 -2 8 10 7905.83 1028.9 1
 2 -8 10 8003.91 857.489 4
 2 -8 10 7280.14 757.029 7
 -2 -8 10 7474.66 745.138 7
 2 -8 10 8144.45 1039.56 6
 -2 8 12 291.796 225.816 1
 2 8 12 183.547 186.762 4
 -2 -8 12 139.826 89.4116 4
 2 -8 12 251.612 119.106 1
 2 -8 12 -13.5031 181.972 6
 2 8 12 81.8957 41.9716 8
 2 8 12 23.0201 144.728 1
 -2 -8 12 147.639 226.353 6
 -2 -8 12 207.193 161.811 1
 2 -8 12 140.286 155.363 4
 -2 8 14 6848.52 1015.87 1
 -2 -8 14 8142.39 1168.42 6
 2 -8 14 7169.38 1070.33 6
 -2 8 14 6752.25 1344.6 4
 2 -8 14 8760.45 994.109 4
 -2 -8 14 9632.36 912.45 4
 2 8 14 6762.38 1297.94 4
 2 8 14 7353.17 1007.97 1
 -2 -8 16 3850.64 873.447 6
 -2 8 16 5013.68 1178.54 4
 2 8 16 5186.85 1250.45 4
 -2 -8 16 3124.94 563.208 4
 2 -8 16 3891.14 852.768 6
 2 -8 16 4600.14 787.113 4
 -2 8 16 4105.58 809.664 1
 2 8 16 2044.2 528.295 1
 2 -8 18 1174.2 466.202 6
 2 -8 18 897.047 348.592 4
 -2 -8 18 832.994 359.924 6
 2 8 18 1300.17 729.93 4
 -2 8 18 921.349 423.982 4
 -2 -8 20 507.218 411.895 6
 2 -8 20 148.277 308.04 6
 -2 8 20 105.107 228.637 4
 2 8 20 406.182 399.01 4
 2 -8 22 -383.504 446.224 6
 -2 -8 22 586.76 450.662 6
 2 8 22 859.835 583.65 4
 -2 8 22 234.983 513.615 4
 -2 -9 -23 858.256 599.328 5
 2 -9 -23 1114.56 608.716 5
 -2 -9 -21 1929.79 798.633 2
 2 -9 -21 465.859 656.628 2
 -2 -9 -21 682.434 363.392 5
 2 9 -21 2031.44 716.118 5
 2 9 -21 559.839 231.595 3
 -2 9 -21 1872.92 859.802 5
 2 -9 -21 1058.86 621.886 5
 -2 9 -19 -84.1163 481.745 5
 -2 9 -19 -44.8 433.086 3
 -2 -9 -19 515.493 255.863 5
 2 9 -19 212.401 660.601 5
 2 9 -19 685.375 358.678 3
 2 -9 -19 514.529 567.877 2
 -2 -9 -19 671.083 474.189 2
 2 -9 -19 221.891 286.021 5
 2 9 -17 4732.97 1033.45 3
 2 9 -17 4266.73 1096.51 5
 -2 9 -17 5296.87 1007.01 3
 2 -9 -17 3535.58 862.853 5
 -2 -9 -17 3195.69 966.837 2
 -2 9 -17 2919.93 878.238 5
 2 -9 -17 5370.91 1169.21 2
 -2 -9 -17 3784.23 903.287 5
 2 -9 -15 212.152 280.728 5
 -2 -9 -15 630.219 384.807 5
 2 9 -15 572.535 421.578 5
 2 9 -15 791.637 463.196 3
 2 -9 -15 531.079 274.166 2
 -2 9 -15 603.104 195.719 5
 -2 9 -15 110.829 134.679 3
 -2 -9 -15 599.031 458.343 2
 -2 9 -13 10409.8 1393.34 5
 -2 -9 -13 11386.6 1341.08 5
 -2 9 -13 10039.9 1299.11 3
 2 9 -13 11270.7 1483.61 5
 2 9 -13 10651.6 1379.31 3
 2 -9 -13 10398.6 1451.32 2
 -2 -9 -13 10317 1463.38 2
 2 -9 -13 10639.3 1235.23 5
 2 9 -11 989.35 456.938 5
 2 9 -11 696.253 251.089 4
 2 9 -11 825.129 359.411 3
 -2 9 -11 627.819 321.606 3
 -2 -9 -11 1330.28 454.582 5
 -2 9 -11 985.265 337.855 5
 -2 -9 -11 853.724 384.662 2
 2 -9 -11 1058.43 444.319 2
 2 -9 -11 584.528 263.264 5
 -2 -9 -9 3204.84 583.555 5
 -2 9 -9 2705.84 503.059 1
 -2 -9 -9 3064.16 744.068 2
 2 -9 -9 2992.89 484.194 5
 -2 9 -9 3365.99 748.798 3
 -2 9 -9 2769.26 630.712 5
 2 9 -9 2591.73 621.815 5
 2 9 -9 2578.65 722.012 3
 2 -9 -9 3048.3 743.823 2
 2 9 -9 2306.04 441.84 4
 -2 -9 -7 2720.69 443.684 5
 -2 9 -7 2336.98 474.431 5
 -2 -9 -7 2122.44 250.323 8
 -2 -9 -7 2387.83 650.433 2
 -2 9 -7 2032.9 446.909 1
 2 9 -7 3117.23 589.811 5
 -2 9 -7 2630.49 678.67 3
 2 -9 -7 2266.81 704.522 2
 2 -9 -7 2912.85 400.953 5
 2 9 -7 2244.19 626.076 3
 2 9 -7 2613.46 429.765 4
 2 9 -5 9472.35 1077.61 1
 -2 -9 -5 7938.16 668.543 8
 2 -9 -5 7657.19 455.979 8
 -2 9 -5 8558.44 1052.62 4
 2 9 -5 9161.8 896.195 4
 -2 9 -5 8332.83 928.119 1
 2 9 -5 9222.55 930.415 5
 2 -9 -5 6805.56 1193.05 2
 2 -9 -5 9269.38 564.799 5
 2 9 -5 9562.57 1255.52 3
 -2 -9 -5 8579.02 691.618 5
 -2 9 -5 9413.61 859.055 5
 -2 -9 -5 7595.71 1171.87 2
 -2 9 -3 31446.5 1775.04 1
 2 9 -3 33525.9 1650.7 5
 -2 9 -3 30519.7 1290.71 5
 -2 -9 -3 32133.1 2555.19 2
 2 -9 -3 34452.9 3033.96 2
 2 9 -3 32297 1961.69 1
 2 -9 -3 31789.1 1574.24 7
 -2 9 -1 2227.92 272.477 5
 2 -9 -1 3733.74 1034.92 2
 2 9 -1 2954.92 598.169 1
 -2 9 -1 2422.5 505.737 1
 -2 -9 -1 3300.61 947.119 2
 -2 -9 -1 2178.34 326.055 5
 2 9 -1 2351.94 253.94 7
 2 -9 -1 4759.51 1449.44 6
 -2 9 -1 3648.68 639.852 7
 2 -9 -1 2347.01 352.989 7
 2 9 1 1601.81 297.45 7
 -2 -9 1 2441.69 1079.29 6
 2 -9 1 2521.17 931.081 6
 2 -9 1 1762.94 254.148 7
 2 9 1 2444.68 582.043 1
 2 -9 1 1776.33 222.175 5
 -2 9 1 1592.2 416.913 1
 -2 -9 1 1715.45 294.381 5
 -2 9 1 1977.17 390.333 7
 -2 9 3 35132.2 1775.7 7
 -2 -9 3 29806.5 2693.59 6
 2 -9 3 30132 1239.04 5
 2 -9 3 31832.4 855.402 7
 2 -9 3 34528.9 2450.9 6
 -2 9 3 36815.6 2027.73 1
 2 9 3 33923.2 2062.93 1
 -2 -9 3 33158.4 1478.59 5
 2 9 3 34708.3 1687.79 7
 2 -9 5 8653.66 802.677 5
 -2 -9 5 9630.36 1329.58 6
 -2 -9 5 9005.48 872.655 5
 -2 9 5 10129.5 1102.13 1
 2 -9 5 7902.91 549.849 7
 2 -9 5 7614.27 1053.97 6
 2 -9 5 8754.3 858.023 1
 2 9 5 12008.1 1219.44 1
 -2 -9 7 3028.2 744.918 6
 2 9 7 3075 652.808 1
 2 -9 7 3501.83 688.258 6
 2 -9 7 2684.73 464.67 1
 -2 -9 7 2345.95 280.064 7
 -2 9 7 2454.72 529.293 1
 2 -9 9 3687.23 725.098 6
 2 -9 9 2920.15 452.248 1
 -2 -9 9 3817.78 813.242 6
 -2 -9 9 2590.15 485.933 1
 -2 9 9 2386.13 427.748 5
 -2 9 9 2794.73 571.817 1
 -2 -9 9 2759.23 399.678 7
 2 9 9 3454.36 766.27 1
 -2 9 11 732.066 338.215 1
 2 -9 11 1214.46 357.011 4
 2 -9 11 1059.19 396.303 6
 2 -9 11 840.961 242.555 1
 2 -9 11 600.654 207.9 7
 2 9 11 2028.42 641.107 1
 -2 -9 11 1015.67 443.879 6
 -2 -9 11 834.768 248.559 1
 2 9 11 1389.05 625.615 4
 -2 -9 11 789.277 259.96 7
 -2 9 13 10281.2 1254.62 1
 2 9 13 12173.6 1746.18 4
 2 -9 13 10345.9 1060.93 4
 -2 -9 13 10806.8 935.725 4
 -2 -9 13 9166.97 1269.73 6
 2 -9 13 11347.8 1354.72 6
 2 9 13 10486.3 1267.31 1
 2 -9 15 357.046 272.1 4
 -2 -9 15 168.794 123.305 4
 2 9 15 382.552 363.46 1
 -2 9 15 763.804 488.448 4
 2 -9 15 -200.967 195.318 6
 -2 9 15 532.751 379.073 1
 -2 -9 15 199.141 263.205 6
 2 9 15 94.0687 306.24 4
 2 -9 17 4828.66 1009.98 6
 2 -9 17 1671.24 453.434 4
 -2 -9 17 3327.6 802.459 6
 -2 9 17 3511.45 1023.38 4
 2 9 17 1881.87 584.543 1
 -2 9 17 2353.47 631.772 1
 2 9 17 3529.09 1142.57 4
 2 9 19 26.7258 262.926 4
 2 -9 19 729.266 444.989 6
 -2 -9 19 659.349 438.741 6
 -2 9 19 622.272 580.957 4
 2 -9 21 613.139 354.053 6
 2 9 21 1345.05 693.64 4
 -2 9 21 1135.81 617.61 4
 -2 -9 21 963.944 575.548 6
 2 -10 -22 1955.98 918.851 2
 2 10 -22 1450.83 602.344 3
 -2 -10 -22 802.026 481.497 5
 2 -10 -22 1061.99 615.988 5
 -2 10 -20 1269.36 693.019 5
 2 -10 -20 1477.67 703.849 2
 -2 -10 -20 1237.02 648.75 2
 2 10 -20 750.105 491.957 3
 2 -10 -20 763.321 531.044 5
 -2 10 -20 690.431 269.21 3
 2 10 -20 479.556 407.094 5
 -2 -10 -20 1272.67 584.819 5
 2 -10 -18 3361.41 1031.23 2
 2 -10 -18 3548.34 874.582 5
 2 10 -18 4100.89 1018.23 5
 -2 10 -18 2333.83 817.161 5
 -2 -10 -18 2827.88 899.922 2
 2 10 -18 3540.38 920.707 3
 -2 -10 -18 3489.2 896.562 5
 -2 10 -18 3492.52 915.843 3
 -2 10 -16 726.06 398.139 5
 -2 -10 -16 2401.84 860.917 2
 2 -10 -16 687.366 372.68 5
 2 -10 -16 2425.75 763.145 2
 2 10 -16 2200.5 719.891 5
 -2 -10 -16 543.224 437.051 5
 -2 10 -16 1199.47 500.496 3
 2 10 -16 1742.01 644.941 3
 -2 -10 -14 12591.6 1478.94 5
 2 10 -14 12719 1651.34 5
 2 10 -14 11374.4 1573.08 3
 -2 -10 -14 11434.2 1641.18 2
 2 -10 -14 12676.1 1726.72 2
 -2 10 -14 13178.7 1619.11 5
 -2 10 -14 13141.9 1598.03 3
 2 -10 -14 13468.5 1458.79 5
 2 -10 -12 22728.1 1696.79 5
 -2 10 -12 21931.9 1948.5 5
 2 -10 -12 21965.9 2186.06 2
 -2 -10 -12 21731.3 2165.15 2
 -2 10 -12 21129.4 1988.36 3
 -2 -10 -12 22778.3 1767.5 5
 2 10 -12 22425.7 2031.91 5
 2 10 -12 19977.9 1979.71 3
 2 10 -10 4843.94 958.001 3
 -2 -10 -10 3456.86 807.143 2
 2 -10 -10 3374.08 863.911 2
 2 -10 -10 3288.19 566.841 5
 2 10 -10 4766.82 848.035 5
 -2 -10 -10 4447.74 702.668 5
 -2 10 -10 2989.4 732.51 3
 2 10 -10 3382.96 576.872 4
 -2 10 -10 4981.81 901.173 5
 -2 10 -8 9815.64 1402.91 3
 2 10 -8 8889.37 855.099 4
 -2 10 -8 9601.51 1086.27 1
 2 -10 -8 11339.8 887.489 5
 2 10 -8 12301.1 1248.95 5
 2 -10 -8 10202.3 1508.55 2
 2 10 -8 10271.1 1347.97 3
 -2 -10 -8 10712.5 951.718 5
 -2 -10 -8 9488.21 1367.98 2
 -2 10 -8 12869.4 1263.77 5
 2 -10 -6 3746.03 404.983 5
 -2 10 -6 4639.79 998.043 3
 -2 -10 -6 3584.87 442.908 8
 2 -10 -6 3699.75 904.882 2
 2 10 -6 4485.13 915.287 3
 -2 10 -6 4873.13 683.956 5
 2 10 -6 4215.67 671.23 5
 -2 10 -6 4187.56 711.274 1
 2 10 -6 4556.19 790.095 1
 2 10 -6 4062.56 623.173 4
 -2 -10 -6 3316.17 828.485 2
 -2 -10 -6 4273.04 506.069 5
 2 10 -4 30654.2 2323.7 3
 2 10 -4 31321.7 2044.83 1
 2 -10 -4 30200.3 2822.11 2
 2 10 -4 31455.1 1701.3 5
 -2 10 -4 31082.4 1449.09 5
 -2 -10 -4 30678.8 2577.65 2
 -2 -10 -4 29333.9 1170.16 5
 -2 10 -4 29742.7 1882.16 1
 -2 10 -2 20189.2 1518.12 1
 2 -10 -2 19372.7 1177.11 7
 -2 -10 -2 24614.7 2454.96 2
 2 10 -2 18439.7 1569.31 1
 2 -10 -2 24009.2 2820.05 2
 -2 10 -2 17416.5 887.302 5
 -2 -10 0 11169 2273.65 6
 2 10 0 8762.15 1056.64 1
 2 10 0 7014.24 578.462 7
 2 -10 0 10301.9 2075.4 6
 -2 -10 0 10009 1679.28 2
 -2 -10 0 7155.53 570.697 5
 2 -10 0 7459.02 602.848 7
 -2 10 0 8046.52 1003.56 1
 -2 10 0 7226.94 776.873 7
 2 -10 2 22873.9 2396.28 6
 2 -10 2 19863.5 758.187 7
 -2 10 2 21834.8 1628.39 1
 2 -10 2 19052.9 882.134 5
 -2 -10 2 18235.9 2460.64 6
 -2 10 2 20865.7 1343.16 7
 2 10 2 20236.4 1617.09 1
 2 10 2 19974.9 1219.45 7
 -2 -10 2 19874.9 1088.62 5
 2 -10 4 30187.6 1404.84 5
 2 -10 4 34038.5 2465.54 6
 -2 -10 4 31563.1 1576.44 5
 -2 -10 4 28744.2 2568.4 6
 2 -10 4 29952.8 745.057 7
 2 10 4 32391.7 2066.94 1
 2 10 4 31924.9 1798.62 7
 -2 10 4 34717.3 2107 1
 2 10 6 5021.18 802.6 1
 -2 -10 6 3983.01 910.39 6
 -2 10 6 4513.58 809.629 1
 2 -10 6 3517.09 363.436 7
 2 -10 6 3991.2 815.404 6
 -2 -10 8 11995.9 1455.41 6
 2 10 8 10614 1227 1
 -2 10 8 11537.8 1319.36 1
 -2 -10 8 10725.2 622.024 7
 2 -10 8 12961.9 1397.67 6
 -2 -10 10 4133.04 501.097 7
 -2 10 10 4643.16 869.921 1
 -2 -10 10 4556.73 894.051 6
 2 -10 10 4205.15 527.904 7
 2 -10 10 3806.25 553.545 1
 2 10 10 3347.38 741.78 1
 2 -10 10 3694.86 793.757 6
 2 10 12 23195.9 2365.64 4
 2 -10 12 21904.6 1902.81 6
 -2 -10 12 22664.4 1997.7 6
 -2 10 12 21335.7 1856.22 1
 2 10 12 22931.4 1938.37 1
 -2 -10 14 15263.3 1724.36 6
 2 10 14 10410 1334.53 1
 2 -10 14 12305.9 1228.91 4
 2 -10 14 11047.3 1436.14 6
 -2 10 14 10779.4 1359.02 1
 2 10 14 10830.4 1705.61 4
 -2 -10 16 1684.83 553.947 6
 2 10 16 259.365 129.658 1
 -2 10 16 1152.2 462.568 1
 2 -10 16 1498.59 571.525 6
 -2 10 16 911.661 616.319 4
 2 10 16 1271.69 656.426 4
 2 -10 16 1013.1 349.491 4
 -2 -10 18 3083.98 907.947 6
 -2 10 18 2031.25 820.274 4
 2 -10 18 2672.64 835.479 6
 2 10 18 3105.55 1026.35 4
 -2 10 20 1184.52 1033.77 4
 -2 -10 20 339.368 240.963 6
 2 -10 20 675.722 460.039 6
 2 10 20 490.926 388.285 4
 -2 10 22 1556.04 818.817 4
 -2 -11 -21 5311.28 1425.25 2
 -2 -11 -21 3361.56 998.152 5
 -2 11 -21 6115 1398.35 5
 2 -11 -21 3833.05 1165.28 2
 2 11 -21 5257.13 1422.29 5
 2 11 -21 4403.76 1141.6 3
 -2 -11 -19 13610.1 2146.66 2
 -2 -11 -19 15985.3 2031.76 5
 2 11 -19 16698.3 2255.99 5
 -2 11 -19 14846.6 1934.7 3
 2 -11 -19 12663.5 2038.03 2
 2 -11 -19 14701.5 1867.76 5
 -2 11 -19 16169.6 2226.77 5
 2 11 -19 15302.5 2004.14 3
 -2 -11 -17 5487.97 1301.65 2
 2 11 -17 5160.67 1132 3
 -2 11 -17 4599.12 1056.86 3
 2 11 -17 5315.51 1188.96 5
 2 -11 -17 5172.85 1027.91 5
 -2 -11 -17 4167 943.27 5
 -2 11 -17 5856.08 1251.65 5
 2 -11 -17 5071.43 1305.37 2
 2 -11 -15 2295.06 835.016 2
 -2 11 -15 1189.02 449.788 3
 -2 -11 -15 1686.66 737.505 2
 2 11 -15 2040.32 688.358 5
 -2 -11 -15 1859.97 533.234 5
 2 11 -15 1786.03 636.045 3
 2 -11 -15 1608.56 518.316 5
 -2 11 -15 2528.1 759.821 5
 2 11 -13 2411.22 728.117 5
 -2 11 -13 918.687 248.822 3
 2 -11 -13 1785.27 661.824 2
 -2 -11 -13 1916.16 544.156 5
 -2 11 -13 1315.36 476.233 5
 2 11 -13 1241.33 386.739 3
 -2 -11 -13 1405.63 568.967 2
 2 -11 -13 3154.63 673.784 5
 2 11 -11 15644.9 1783.75 3
 2 -11 -11 15931.6 1317.68 5
 -2 11 -11 17270.6 1683.07 5
 -2 -11 -11 17302 1442.24 5
 2 11 -11 19503.3 1812.04 5
 -2 11 -11 14827.9 1773.96 3
 -2 -11 -11 16040.5 1935.67 2
 2 -11 -11 16514.2 1981.52 2
 -2 11 -9 4243.95 768.706 5
 2 -11 -9 3650.52 925.916 2
 2 11 -9 2953.38 668.948 5
 -2 11 -9 3885.95 959.802 3
 -2 -11 -9 3416.13 910.396 2
 2 11 -9 2032.9 425.905 4
 2 -11 -9 3157.93 503.141 5
 -2 -11 -9 3297.31 563.63 5
 2 11 -9 3408.82 816.062 3
 -2 11 -9 3316.95 698.406 1
 -2 -11 -7 3428.27 399.917 8
 -2 -11 -7 2979.24 853.19 2
 2 -11 -7 4666.55 490.076 5
 2 11 -7 3827.69 679.731 5
 -2 11 -7 4192.34 742.354 1
 -2 11 -7 4068.82 924.64 3
 -2 -11 -7 4219.11 550.07 5
 2 -11 -7 3371.79 858.241 2
 2 11 -7 4203.13 642.333 4
 -2 11 -7 4802.72 719.886 5
 2 11 -7 4236.03 882.608 3
 -2 -11 -5 698.866 250.547 8
 -2 -11 -5 1134.06 460.517 2
 2 11 -5 1113.19 372.408 5
 2 -11 -5 861.264 200.15 8
 2 -11 -5 752.524 135.486 5
 2 11 -5 582.688 256.919 4
 2 -11 -5 1769.41 710.594 2
 -2 11 -5 995.283 292.02 5
 2 11 -5 780.801 276.381 1
 -2 -11 -5 884.573 208.18 5
 2 11 -5 1274.53 546.754 3
 -2 11 -5 415.388 306.286 1
 2 -11 -3 138549 6723.47 2
 -2 11 -3 111320 3836.94 1
 -2 11 -3 110898 2568.99 5
 -2 -11 -3 129527 5708.93 2
 2 11 -3 109911 3999.23 1
 2 -11 -1 12823.6 2110.27 2
 -2 11 -1 12606 1347.17 7
 -2 11 -1 8881.03 1095.37 1
 2 11 -1 8497.75 550.324 7
 -2 -11 -1 9228.46 622.014 5
 -2 -11 -1 13550.7 1959.95 2
 2 11 -1 9178.81 1166.42 1
 -2 -11 1 6408.16 1760.73 6
 -2 11 1 11632.1 1243.49 1
 -2 -11 1 9455.81 701.69 5
 2 11 1 10032.5 812.946 7
 -2 11 1 9595.05 916.949 7
 2 -11 1 11984.5 2081.15 6
 2 -11 1 8946.84 521.13 5
 2 11 1 10031.3 1194.97 1
 2 -11 1 9092.75 609.058 7
 2 11 3 108813 4017.04 1
 -2 11 3 113373 4010.06 1
 2 -11 3 102427 2383.03 5
 -2 -11 3 113821 5794.74 6
 2 -11 3 101043 1432.46 7
 2 -11 3 110450 5213.37 6
 -2 -11 3 109184 2780.64 5
 2 11 3 107323 3153.68 7
 -2 11 3 115719 3451.68 7
 -2 11 5 1118.49 435.402 1
 -2 -11 5 794.879 493.038 6
 2 -11 5 1033.81 281.888 5
 2 -11 5 1338.03 500.74 6
 2 11 5 673.981 349.641 1
 -2 -11 7 2636.16 732.147 6
 2 11 7 4893.18 865.135 1
 2 -11 7 4367.87 884.419 6
 2 -11 7 3441.69 363.379 7
 -2 11 7 3717.56 755.975 1
 2 -11 7 3916.61 331.258 7
 2 -11 9 3451.98 401.527 7
 2 11 9 4884.8 889.275 1
 -2 11 9 3965.29 830.891 1
 2 -11 9 4207.16 897.523 6
 -2 -11 9 3837.44 915.841 6
 -2 -11 9 3228.91 352.754 7
 2 -11 11 18293.7 1791 6
 2 11 11 15673.9 1661.34 1
 -2 11 11 16373.4 1672.71 1
 -2 -11 11 18113.1 1879.56 6
 2 11 11 16558.1 1997.76 4
 -2 -11 13 2070.44 652.751 6
 2 11 13 2169.94 639.936 1
 -2 11 13 2641.77 700.849 1
 2 11 13 1892.18 748.173 4
 2 -11 13 1106.02 406.512 6
 -2 11 15 936.514 360.181 4
 -2 -11 15 1704.87 551.459 6
 2 -11 15 1615.74 554.473 6
 2 11 15 1300.59 601.169 4
 2 11 15 577.17 140.985 1
 -2 11 15 1862.58 648.189 1
 2 11 17 5872.54 1437.62 4
 -2 11 17 5939.86 1450.04 4
 2 -11 17 4184.22 993.094 6
 2 11 17 4074.77 881.026 1
 -2 -11 17 3902.53 896.428 6
 -2 11 17 5087.28 1025.89 1
 -2 -11 19 13790 1918.6 6
 2 11 19 13851 2266.63 4
 2 -11 19 17103.1 2090.28 6
 -2 11 19 12349.5 2170.38 4
 2 -11 21 4146.9 1087.9 6
 -2 11 21 3382.18 1170.81 4
 2 11 21 4614.56 1433.67 4
 -2 -11 21 4219.93 1110.47 6
 2 12 -22 -136.381 283.303 3
 2 -12 -20 853.254 808.016 2
 -2 -12 -20 664.871 623.967 2
 -2 12 -20 1256.11 735.228 3
 2 12 -20 216.655 529.759 3
 2 12 -20 -729.77 658.527 5
 -2 12 -20 -174.16 425.415 5
 2 12 -18 2857.91 887.187 3
 -2 12 -18 2036.24 677.141 3
 2 -12 -18 3073.65 823.802 5
 -2 12 -18 2087.35 813.695 5
 2 -12 -18 3431.38 1114.99 2
 2 12 -18 2462.14 889.737 5
 -2 -12 -18 2946.83 1058.86 2
 -2 -12 -18 3038.37 872.489 5
 -2 -12 -16 4791.84 1250.61 2
 -2 12 -16 5171.47 1139.3 3
 2 12 -16 5597.85 1167.23 5
 2 -12 -16 6232.14 1055.91 5
 -2 -12 -16 5408.83 1049.25 5
 -2 12 -16 4642.8 1059.27 5
 2 12 -16 5653.54 1228.45 3
 2 -12 -16 4314.54 1200.23 2
 2 12 -14 3179.12 854.235 3
 2 -12 -14 3553.94 722.795 5
 -2 12 -14 3090.58 881.203 3
 -2 12 -14 3041.7 820.692 5
 -2 -12 -14 2886.03 912.549 2
 2 -12 -14 3573.82 1032.15 2
 2 12 -14 3265.93 838.654 5
 -2 -12 -14 4126.24 825.094 5
 -2 -12 -12 16982.3 1516.69 5
 -2 -12 -12 16328.2 2113.72 2
 -2 12 -12 17769.8 1789.72 5
 2 12 -12 14500.9 1866.13 3
 2 12 -12 18907 1895.08 5
 2 -12 -12 16966.9 1428.35 5
 -2 12 -12 16106.8 1936.75 3
 2 -12 -12 16088.6 2092.3 2
 -2 -12 -10 3515.07 937.918 2
 -2 12 -10 2897.79 644.406 1
 -2 12 -10 2716.94 746.45 3
 2 -12 -10 2317.07 781.22 2
 2 -12 -10 4008.72 579.989 5
 -2 -12 -10 3065.12 565.651 5
 2 12 -10 1871.81 630.791 3
 -2 12 -10 3217.43 695.93 5
 2 12 -10 3460.96 721.896 5
 -2 12 -8 10216.2 1119.64 5
 -2 -12 -8 9943.71 891.712 5
 -2 -12 -8 9487.58 1528.27 2
 2 12 -8 10836.4 1257.02 5
 2 12 -8 11280.9 1562.38 3
 -2 12 -8 9130.74 1179.63 1
 -2 -12 -8 7917.19 491.221 8
 2 12 -8 7685.86 897.473 4
 -2 12 -8 9688.32 1530.83 3
 2 -12 -8 11381 832.274 5
 2 -12 -8 6794.31 1366.46 2
 2 12 -6 11590.8 1595.6 3
 2 -12 -6 10534.2 584.288 5
 -2 -12 -6 9232.87 856.615 8
 2 12 -6 7958.93 1046.01 4
 -2 -12 -6 11832.2 836.307 5
 -2 12 -6 10856.2 1027.15 5
 2 -12 -6 9620.44 603.914 8
 -2 12 -6 10596 1249.46 1
 -2 -12 -6 7633.32 1417.65 2
 2 -12 -6 9752.46 1695.91 2
 2 12 -6 10050.8 1302.93 1
 2 12 -6 12442.9 1233.55 5
 2 -12 -4 93533.9 5559.09 2
 -2 12 -4 85436.1 2539.21 5
 -2 -12 -4 83518.8 1882.74 5
 2 12 -4 86066.6 4321.25 3
 -2 -12 -4 97129 5097.96 2
 -2 12 -4 88122.6 3613.32 1
 2 12 -4 86299.2 3815.85 1
 -2 12 -2 31381.2 1310.4 5
 -2 -12 -2 29456.8 1090.94 5
 2 12 -2 30889 2203.56 1
 2 -12 -2 40437.9 3906.15 2
 -2 -12 -2 42090.7 3492.81 2
 -2 12 -2 33085.3 2187.25 1
 -2 12 0 9778.99 1030.59 7
 -2 -12 0 8114.55 616.173 5
 2 12 0 8223.41 677.431 7
 2 12 0 8823.74 1185.46 1
 -2 -12 0 9223.72 1686.39 2
 2 -12 0 11135.2 1964.68 2
 -2 12 0 8571.94 1122.56 1
 2 -12 0 11339.1 2318.01 6
 -2 12 2 33352.5 2248.27 1
 2 -12 2 39934.9 3617.18 6
 2 12 2 33348.2 2301.6 1
 2 -12 2 32004 1188.51 5
 -2 -12 2 32025.4 1426.26 5
 2 12 2 30764.9 1606.81 7
 -2 12 2 35443 1898.6 7
 -2 -12 2 33814 3565.35 6
 -2 12 4 90769.4 3754.36 1
 2 -12 4 79983.1 2370.87 5
 2 -12 4 88498.9 4635.98 6
 2 12 4 90790.5 3875.57 1
 -2 -12 4 82363.4 2641.02 5
 -2 -12 4 97436.1 5308.36 6
 2 12 6 14622.4 1626.7 1
 2 -12 6 10846.9 1470.4 6
 -2 12 6 11059 1332.55 1
 -2 -12 6 11134.4 1643.59 6
 -2 12 8 11793.4 1452.42 1
 2 -12 8 9409.14 1351.01 6
 2 12 8 11825 1407.44 1
 2 -12 8 8844.62 496.562 7
 -2 -12 8 11499.6 1608.77 6
 2 -12 8 8646.25 555.672 7
 -2 -12 10 3008.31 848.771 6
 -2 12 10 3316.72 800.529 1
 2 -12 10 2735.08 763.037 6
 2 12 10 3066.72 774.925 1
 -2 12 12 17936.7 1842.86 1
 2 -12 12 16359.7 1813.12 6
 -2 -12 12 18750.5 2018.84 6
 2 12 12 20972.5 2035.51 1
 2 12 12 21159.6 2372.88 4
 -2 -12 14 3778.2 942.135 6
 2 12 14 3218.03 970.942 4
 2 -12 14 2546.3 724.315 6
 2 12 14 4896.2 984.14 1
 -2 12 14 3620.85 832.164 1
 2 12 16 4919.73 1300.79 4
 2 12 16 3400.37 872.138 1
 -2 12 16 4997.73 1046.38 1
 2 -12 16 4714.6 1046.02 6
 -2 12 16 4834.86 1279.24 4
 -2 -12 16 5036.01 1122.64 6
 -2 12 18 2980.63 831.622 1
 2 12 18 3423.77 1114.73 4
 -2 12 18 2424.34 1091.96 4
 2 -12 18 1606.14 703.673 6
 -2 -12 18 3652.69 991.892 6
 2 12 20 1708 922.355 4
 -2 -12 20 1180.03 731.739 6
 -2 12 20 -362.37 451.086 4
 2 -12 20 345.506 404.025 6
 2 13 -21 3651.38 1062.05 3
 2 13 -19 4211.13 1166.37 5
 -2 -13 -19 2908.67 1149.35 2
 2 13 -19 2842.44 1030.33 3
 -2 13 -19 2704.99 1041.62 3
 -2 13 -19 3749.68 1102.38 5
 2 -13 -19 3945.14 1331.07 2
 2 -13 -17 5117.4 1394.93 2
 2 13 -17 5645.15 1224.9 5
 -2 13 -17 6244.13 1288.54 5
 -2 13 -17 4670.8 1132.78 3
 2 13 -17 5647.03 1271.4 3
 -2 -13 -17 5628.08 1444.29 2
 -2 13 -15 1560.11 661.336 5
 -2 -13 -15 1596.7 707.58 2
 -2 -13 -15 1478.33 506.45 5
 2 -13 -15 1049.22 381.844 5
 -2 13 -15 1404.42 582.906 3
 2 13 -15 1584.46 660.31 5
 2 13 -15 849.615 545.767 3
 2 -13 -15 1575.35 734.999 2
 -2 13 -13 9775.74 1375.85 5
 -2 13 -13 7265.5 1348.57 3
 2 -13 -13 7860.35 1002.62 5
 2 13 -13 7350.02 1384.1 3
 -2 -13 -13 7035.95 1455.79 2
 -2 -13 -13 9818.08 1194.03 5
 2 -13 -13 7286.06 1509.47 2
 2 13 -13 10004.4 1472.39 5
 2 13 -11 -125.161 344.269 3
 2 -13 -11 -70.816 234.509 2
 -2 13 -11 303.461 340.37 5
 -2 -13 -11 110.567 278.307 2
 2 -13 -11 326.234 177.268 5
 -2 -13 -11 255.896 89.0076 5
 2 13 -11 592.923 415.786 5
 -2 13 -11 -69.7238 372.005 3
 -2 -13 -9 532.28 488.322 2
 -2 13 -9 1700.48 511.847 5
 -2 -13 -9 1032.84 281.695 5
 -2 13 -9 1322.66 436.57 1
 2 -13 -9 1168.92 278.174 5
 -2 13 -9 1203.99 550.546 3
 2 13 -9 180.323 191.696 3
 2 13 -9 1779.79 621.636 5
 2 -13 -9 426.484 342.863 2
 2 -13 -7 1029.35 162.526 8
 -2 13 -7 1896.64 521.442 5
 -2 -13 -7 601.159 524.104 2
 -2 -13 -7 1270.66 284.594 5
 2 -13 -7 1556.59 253.098 5
 -2 13 -7 2330.22 801.07 3
 2 13 -7 2228.44 791.38 3
 -2 13 -7 2655.68 705.026 1
 -2 -13 -7 1059.85 280.691 8
 2 13 -7 1704.16 541.315 5
 2 13 -7 1049.39 395.22 4
 2 13 -7 985.823 434.824 1
 2 -13 -7 835.042 583.615 2
 2 -13 -7 888.463 183.626 8
 -2 -13 -5 23704.7 1533.38 8
 2 13 -5 25183.7 2413.86 3
 -2 13 -5 26043.3 2057.3 1
 -2 -13 -5 22653.4 2608.66 2
 -2 13 -5 23646.7 1453.16 5
 -2 -13 -5 24040.6 1020.62 5
 2 13 -5 22179.4 1977.73 1
 2 13 -5 24431.3 1719.1 5
 2 -13 -5 24671.2 2878.46 2
 -2 -13 -3 27463.1 2864.32 2
 -2 13 -3 24165.1 2010.89 1
 2 -13 -3 28583.3 3251.16 2
 -2 13 -3 21157.5 1221.79 5
 -2 -13 -3 20470 901.971 5
 2 13 -3 20318.3 1914.9 1
 -2 -13 -3 19027.4 820.812 5
 2 -13 -1 25902.5 3235.88 2
 -2 -13 -1 21805.6 915.936 5
 -2 -13 -1 29273.1 3065.25 2
 -2 13 -1 26882.7 2253.51 7
 2 13 -1 19644.2 965.89 7
 -2 13 -1 24943.6 1999.53 1
 2 13 -1 18983 1816.75 1
 -2 -13 1 25589.9 3353.94 6
 -2 -13 1 21499.8 1079.37 5
 -2 13 1 23316.5 1594.21 7
 -2 13 1 22551.4 1961.62 1
 -2 -13 1 24357.4 2713.36 2
 2 -13 1 24097.1 3124.95 6
 2 13 1 21994.4 1945.55 1
 2 13 1 20686.7 1250.6 7
 -2 -13 3 24616.3 2983.97 6
 2 -13 3 23435.1 2757.55 6
 -2 13 3 25700.5 2086.77 1
 -2 -13 3 22078 1291.81 5
 2 13 3 22921.2 1990.88 1
 2 -13 3 22339.8 1141.79 5
 2 13 3 21996.5 1515.24 7
 2 -13 5 22476.3 1377.17 5
 2 -13 5 21554.4 2299.42 6
 2 13 5 25970 2155.58 1
 -2 -13 5 24600.1 2760.81 6
 -2 13 5 27061.3 2149.07 1
 2 13 7 1586.69 637.312 1
 2 -13 7 1220.28 515.113 6
 -2 13 7 1727.7 573.793 1
 -2 -13 7 891.359 473.235 6
 2 13 9 2007.1 658.853 1
 2 -13 9 1564.73 619.382 6
 -2 13 9 1504.01 530.658 1
 -2 -13 9 1455.88 645.682 6
 -2 -13 11 84.4582 195.367 6
 2 -13 11 552.398 363.099 6
 2 13 11 534.778 298.414 1
 -2 13 11 225.536 365.991 1
 -2 -13 13 8659.92 1452.39 6
 2 -13 13 8627.89 1415.17 6
 2 13 13 10004.4 1684.85 4
 -2 13 13 7380.15 1263.62 1
 2 13 13 9792.63 1435.35 1
 2 -13 15 2193.52 804.575 6
 -2 13 15 971.717 575.33 4
 2 13 15 3217.54 831.078 1
 -2 -13 15 1326.67 536.613 6
 2 13 15 346.506 294.664 4
 -2 13 15 2143.65 707.684 1
 -2 -13 17 4833.18 1170.91 6
 2 13 17 4446.65 1029.37 1
 -2 13 17 5070.69 1126.69 1
 2 -13 17 5065.18 1167.82 6
 -2 13 17 5209.79 1395.47 4
 2 13 17 4295.66 1220.23 4
 2 13 19 3970.91 1253.03 4
 -2 13 19 1940.69 792.24 4
 2 -13 19 4836.24 1271.9 6
 -2 -13 19 5031.83 1265.05 6
 2 14 -20 1394.49 855.808 3
 -2 14 -20 118.897 305.452 3
 2 14 -20 48.3872 309.989 5
 -2 14 -20 1000.2 643.601 5
 2 -14 -18 -348.753 562.7 2
 -2 -14 -18 842.811 580.181 2
 2 14 -18 169.377 462.905 3
 -2 14 -18 -496.216 470.179 3
 2 14 -18 -445.198 470.015 5
 -2 14 -18 216.689 247.43 5
 2 14 -16 262.981 261.8 5
 2 -14 -16 117.071 320.534 2
 -2 14 -16 961.863 596.685 5
 2 14 -16 163.86 321.003 3
 -2 14 -16 -480.076 436.113 3
 -2 -14 -16 -38.9753 426.238 2
 2 -14 -14 1446.15 781.775 2
 -2 14 -14 3465.04 1008.37 5
 -2 -14 -14 2350.04 899.799 2
 -2 14 -14 2493.23 809.109 3
 2 14 -14 2179.53 789.066 3
 2 14 -14 2436.48 773.255 5
 2 14 -12 20389.6 2010.05 5
 -2 14 -12 18329.7 2260.13 3
 -2 14 -12 20773.7 1977.72 5
 -2 -14 -12 19064.4 1552.06 5
 2 14 -12 15754.7 2072.76 3
 2 -14 -12 16195.2 2340.56 2
 -2 -14 -12 14183.3 2134.84 2
 -2 14 -10 435.647 306.445 1
 -2 -14 -10 31.6891 323.341 2
 2 14 -10 -222.442 380.439 3
 -2 -14 -10 65.5077 103.882 5
 2 -14 -10 248.489 218.758 2
 -2 14 -10 677.377 568.097 5
 2 -14 -10 324.661 131.357 5
 2 14 -10 -112.383 298.552 5
 -2 14 -10 151.86 347.95 3
 -2 14 -8 30825.7 2420.2 1
 -2 -14 -8 23073.9 2650.54 2
 2 14 -8 30507.4 2798.33 3
 -2 14 -8 31410.8 2955.18 3
 2 -14 -8 29338.1 1167.33 5
 -2 14 -8 32443.8 2045.11 5
 -2 -14 -8 32470.5 1503.8 5
 2 14 -8 33507.7 2256.1 5
 2 -14 -8 17610.1 2442.46 2
 -2 -14 -6 748.899 191.875 5
 -2 -14 -6 521.087 407.707 2
 2 14 -6 657.454 495.496 3
 2 14 -6 76.3143 155.164 1
 2 -14 -6 729.892 183.163 8
 -2 -14 -6 810.929 308.899 8
 -2 14 -6 668.295 465.458 1
 -2 14 -6 884.219 376.482 5
 2 -14 -6 411.048 363.981 2
 2 14 -6 935.132 353.767 5
 2 14 -4 8251.77 1450.86 3
 -2 14 -4 8060.99 1202.66 1
 2 14 -4 7936.6 1242.4 1
 -2 14 -4 7215.11 763.583 5
 -2 -14 -4 8919.02 1711.48 2
 2 -14 -4 9476.14 1932.39 2
 -2 -14 -4 6531.46 445.791 5
 -2 -14 -4 6214.82 487.93 5
 -2 -14 -2 11297.6 1939.31 2
 -2 14 -2 8562.79 1241.45 1
 -2 -14 -2 7181.19 468.338 5
 2 14 -2 8047.83 1238.29 1
 2 -14 -2 10353.7 2055.67 2
 -2 -14 0 15620 2292.76 2
 2 14 0 13238.7 1566.81 1
 -2 14 0 15020.1 1469.83 7
 2 -14 0 18087.6 3009.02 6
 2 -14 0 15029.6 2383.28 2
 2 14 0 11118 853.545 7
 -2 -14 0 12297.4 742.255 5
 -2 14 0 14588 1614.38 1
 -2 -14 2 8280.49 1934.02 6
 -2 14 2 7229.78 942.771 7
 -2 -14 2 6613.89 657.583 5
 -2 14 2 7662.43 1200.46 1
 2 14 2 7827.26 1215.71 1
 2 -14 2 8267.82 1776.19 6
 2 14 2 7223.84 835.597 7
 2 14 4 8932.87 1307.02 1
 -2 14 4 8337.07 1230.64 1
 2 -14 4 8442.89 1589.86 6
 -2 -14 4 8494.28 1748.83 6
 2 -14 4 7025.58 721.108 5
 -2 -14 4 7430.81 809.998 5
 2 -14 6 198.898 260.837 6
 2 14 6 316.199 208.287 1
 -2 14 6 1020.13 482.734 1
 -2 -14 6 0.8637 365.996 6
 -2 -14 8 29493.6 2885.78 6
 -2 14 8 31340.7 2490.77 1
 2 -14 8 28362.3 2655.11 6
 2 14 8 29982.8 2490.58 1
 -2 14 10 145.367 257.071 1
 2 -14 10 446 460.583 6
 -2 -14 10 59.8612 239.509 6
 2 14 10 215.043 255.754 1
 2 14 12 18810.2 2362.24 4
 2 -14 12 17088.2 2050.44 6
 -2 14 12 19052 2055.24 1
 2 14 12 17564.2 1967.1 1
 -2 -14 12 18518.4 2189.11 6
 2 -14 14 5124.25 1147.64 6
 2 14 14 4167.02 962.828 1
 -2 14 14 2521.72 808.647 1
 2 14 14 3276.41 995.819 4
 -2 -14 14 3308.53 905.644 6
 -2 14 16 -534.532 396.319 1
 2 14 16 -261.228 242.587 4
 2 -14 16 143.191 328.563 6
 2 14 16 140.416 171.541 1
 -2 -14 16 312.567 230.308 6
 -2 14 16 807.97 1287.56 4
 -2 -14 18 430.998 475.726 6
 2 -14 18 72.9108 304.415 6
 -2 14 18 -359.018 347.016 1
 -2 14 18 -475.319 669.718 4
 2 14 18 580.644 542.504 4
 2 15 -21 1599.47 927.159 3
 2 15 -19 199.601 475.394 3
 -2 15 -19 159.539 262.16 5
 -2 15 -19 -152.792 288.419 3
 2 -15 -19 239.746 442.08 2
 2 15 -19 -8.64041 275.072 5
 -2 15 -17 988.65 634.077 3
 2 15 -17 2037.94 737.767 5
 2 15 -17 1050.28 639.402 3
 -2 -15 -17 802.362 471.826 2
 -2 15 -17 2976.36 936.208 5
 2 -15 -17 1560.39 733.462 2
 2 -15 -15 9823.08 1970.15 2
 -2 15 -15 10374.9 1568.12 5
 -2 15 -15 5380.28 1343.06 3
 2 15 -15 8528.72 1634.31 3
 -2 -15 -15 10830.7 2043.43 2
 2 15 -15 9512.45 1565.98 5
 2 -15 -13 77.4992 456.623 2
 2 15 -13 1125.62 518.94 5
 -2 15 -13 1163.97 448.759 5
 2 15 -13 560.617 358.375 3
 -2 15 -13 1551.29 609.091 3
 -2 -15 -13 -162.102 510.706 2
 2 -15 -11 97.9658 354.286 2
 2 15 -11 828.967 456.35 5
 -2 15 -11 182.192 499.043 3
 2 15 -11 97.8953 436.627 3
 -2 15 -11 643.346 354.336 5
 -2 -15 -11 9.77526 378.314 2
 -2 15 -9 1762.95 561.533 1
 -2 -15 -9 1096.65 780.369 2
 2 15 -9 1957.72 561.049 5
 2 15 -9 1022.33 620.477 3
 -2 15 -9 1970.31 558.126 5
 -2 15 -9 1115.1 620.541 3
 2 -15 -9 2157.66 923.404 2
 -2 -15 -7 21158.5 1039.52 5
 2 -15 -7 16944.9 2510.02 2
 2 15 -7 23882.2 1907.68 5
 -2 -15 -7 19321.2 2538.09 2
 -2 -15 -7 13890.2 1133.91 8
 2 15 -7 22491.4 2506.14 3
 -2 15 -7 22117 1628.39 5
 -2 15 -7 23725.1 2675.71 3
 2 15 -7 22138.6 2156.58 1
 -2 15 -7 23124.6 2162.4 1
 -2 -15 -5 1009.05 169.948 5
 -2 -15 -5 1306.84 408.957 8
 2 -15 -5 786.931 539.414 2
 -2 15 -5 1710.53 417.104 5
 -2 -15 -5 1433.88 726.63 2
 2 15 -5 1112.29 448.01 1
 2 15 -5 763.444 439.316 3
 -2 15 -5 2272.6 699.124 1
 2 -15 -3 1096.5 808.197 2
 -2 15 -3 806.093 463.449 1
 -2 -15 -3 -305.006 358.047 2
 2 15 -3 61.4635 231.785 1
 2 15 -1 6646.28 1168.1 1
 2 -15 -1 10209.2 2027.44 2
 2 15 -1 6073.52 646.481 7
 -2 15 -1 8637.38 1340.77 7
 -2 15 -1 6616.61 1128.95 1
 -2 -15 -1 5074.01 401.487 5
 -2 -15 -1 8801.17 1713.92 2
 -2 -15 1 5621.43 551.638 5
 2 -15 1 10827.2 1960.78 2
 2 -15 1 7228.21 1876.19 6
 -2 15 1 5604.75 869.241 7
 -2 -15 1 5138.63 1718.18 6
 -2 -15 1 7901.29 1601.37 2
 -2 15 1 5199.19 1019.87 1
 2 15 1 5610.32 689.395 7
 2 15 1 7040.45 1226.2 1
 -2 -15 3 204.136 487.254 6
 2 15 3 -190.621 189.117 1
 2 -15 3 -578.678 427.981 6
 -2 15 3 130.548 268.916 1
 -2 -15 3 243.189 139.419 5
 2 -15 3 158.13 95.3096 5
 -2 -15 5 1222.52 763.139 6
 -2 15 5 2075.64 683.722 1
 2 -15 5 1083.4 494.52 6
 2 15 5 1894.14 586.621 1
 -2 -15 7 18405.8 2388.68 6
 -2 15 7 22329.9 2174.92 1
 2 -15 7 17160.5 2207.35 6
 2 15 7 22030 2217.93 1
 -2 -15 9 2796.96 891.097 6
 2 15 9 1229.69 550.123 1
 2 -15 9 1007.17 524.552 6
 -2 15 9 2188.61 704.435 1
 2 15 11 -94.7977 358.353 1
 -2 -15 11 -105.978 318.618 6
 -2 15 11 645.834 425.07 1
 2 -15 11 220.351 253.024 6
 -2 -15 13 958.539 586.598 6
 2 -15 13 701.269 533.814 6
 2 15 13 369.574 200.374 1
 2 15 13 350.277 328.164 4
 -2 15 13 837.592 448.67 1
 2 -15 15 11328 1797.99 6
 2 15 15 10963.4 1980.82 4
 -2 -15 15 10636 1819.57 6
 -2 15 15 10120.3 1609.73 1
 2 15 15 10081.9 1614.49 1
 -2 -15 17 1492.06 775.19 6
 -2 15 17 1513.37 894.32 4
 -2 15 17 1972.56 823.604 1
 2 -15 17 1185.87 632.56 6
 2 15 17 1954.63 770.604 1
 2 15 17 782.61 526.692 4
 2 16 -20 -252.235 368.097 3
 2 16 -18 1293.17 795.417 3
 2 16 -18 1382.83 708.202 5
 -2 16 -18 735.603 591.859 3
 2 -16 -18 1671.98 946.971 2
 -2 16 -18 1595.22 728.346 5
 -2 16 -16 5014.28 1156.6 5
 2 16 -16 3276.71 1079.28 3
 2 -16 -16 2392.99 1003.45 2
 -2 16 -16 1992.15 741.395 3
 -2 -16 -16 2823.14 1166.69 2
 2 16 -16 2759.43 931.118 5
 -2 -16 -14 1768.77 840.863 2
 2 16 -14 1219.76 774.892 3
 -2 16 -14 2470.52 751.334 5
 2 16 -14 2257.84 775.037 5
 -2 16 -14 1021 449.546 3
 2 -16 -14 1367.32 669.035 2
 2 16 -12 5708.34 1102.5 5
 2 -16 -12 3703.73 1269.7 2
 -2 -16 -12 3018.3 1036.14 2
 2 16 -12 5123.89 1248.77 3
 -2 16 -12 3950.28 1134.25 3
 -2 16 -12 5477 1065.61 5
 2 16 -10 1382.66 539.421 3
 -2 16 -10 1038.5 498.044 1
 2 16 -10 1055.58 497.137 5
 -2 16 -10 539.384 216.718 5
 -2 -16 -10 1037.84 676.065 2
 -2 16 -10 915.884 683.495 3
 2 -16 -10 565.973 302.942 2
 2 16 -8 24018.6 2655.96 3
 -2 16 -8 22835.6 2277.09 1
 2 16 -8 24273.3 2027.43 5
 -2 16 -8 25692.6 2869.21 3
 -2 16 -8 21861.9 1731.02 5
 2 -16 -8 15630.1 2486.43 2
 -2 -16 -8 20467.5 2792.73 2
 2 16 -6 11574.7 1874.4 3
 -2 16 -6 10759.5 1097.63 5
 -2 -16 -6 12370.1 1199.59 8
 -2 16 -6 9082.59 1443.34 1
 2 -16 -6 10393 2110.07 2
 -2 -16 -6 11517 1996.05 2
 2 16 -6 12377.5 1708.36 1
 -2 16 -4 969.771 484.233 1
 2 16 -4 1217.34 654.601 1
 2 -16 -4 1043.53 674.322 2
 2 16 -4 1403.94 678.249 3
 -2 -16 -4 865.535 371.857 2
 -2 -16 -2 -494.775 677.922 2
 -2 16 -2 54.8602 276.897 1
 2 -16 -2 109.515 398.95 2
 2 16 -2 -266.784 379.159 1
 -2 -16 0 703.788 662.915 2
 2 16 0 595.279 229.137 1
 2 -16 0 1269.85 743.217 2
 -2 16 0 608.221 651.242 1
 -2 -16 2 310.418 466.777 6
 2 16 2 -40.6441 245.376 1
 -2 -16 2 -219.558 294.854 2
 2 -16 2 6.19303 432.534 6
 -2 16 2 342.409 273.401 1
 2 16 4 1134.49 483.259 1
 -2 16 4 492.12 353.233 1
 2 -16 4 68.5416 289.049 6
 -2 -16 4 1164.65 745.49 6
 -2 16 6 10272.7 1521.1 1
 -2 -16 6 11201.9 2028.9 6
 2 16 6 10307 1657.99 1
 2 -16 6 8447.5 1700.24 6
 -2 -16 8 21488.2 2627.6 6
 2 -16 8 17918 2294.71 6
 -2 16 8 25557.4 2433.52 1
 2 16 8 22523 2339.05 1
 2 -16 10 1021.48 473.991 6
 -2 -16 10 784.017 432.166 6
 -2 16 10 2446.16 789.73 1
 2 16 10 816.282 500.184 1
 -2 -16 12 4345.46 1156.74 6
 2 -16 12 4327.33 1115.86 6
 2 16 12 5452.04 1244.67 1
 -2 16 12 5578.78 1246.92 1
 2 16 14 3690.99 1179.61 4
 2 -16 14 2245.99 800.367 6
 2 16 14 2000 758.961 1
 -2 -16 14 1359.57 689.237 6
 -2 16 14 2196.3 893.08 1
 -2 16 16 1770.66 951.471 4
 -2 16 16 1833.62 749.723 1
 -2 -16 16 3528.5 1097.56 6
 2 16 16 2783.44 989.468 4
 2 -16 16 3203.99 971.138 6
 2 16 16 3909.6 1047.99 1
 -2 16 18 1753.98 759.091 1
 -2 17 -19 165.195 366.474 3
 -2 17 -19 -815.387 584.516 5
 2 17 -19 186.564 442.202 5
 2 17 -19 1031.23 832.13 3
 2 -17 -17 5124.21 1628.13 2
 -2 17 -17 4197.76 1018.08 5
 2 17 -17 5102.23 1276.88 5
 2 17 -17 4419.19 1322.06 3
 -2 17 -17 1703.62 866.228 3
 -2 -17 -17 2912.03 1290.36 2
 -2 17 -15 -434.843 576.131 3
 2 -17 -15 -671.982 822.145 2
 2 17 -15 679.796 347.126 3
 -2 -17 -15 -387.2 338.281 2
 -2 17 -15 584.606 364.448 5
 -2 -17 -13 -107.843 664.996 2
 2 17 -13 366.892 228.757 3
 2 -17 -13 650.878 356.431 2
 -2 17 -13 941.051 531.029 5
 2 17 -13 611.216 338.079 5
 -2 17 -13 362.508 259.776 3
 2 17 -11 2563.2 821.11 5
 2 17 -11 640.484 262.141 3
 -2 17 -11 2155.02 917.752 3
 2 -17 -11 2748.23 1042.5 2
 -2 17 -11 3075.37 791.632 5
 -2 17 -9 4869.13 873.138 5
 2 17 -9 5939.87 1397.84 3
 -2 17 -9 7998.08 1678.05 3
 2 17 -9 6963.81 1130.54 5
 -2 -17 -9 5637.74 1418.01 2
 -2 17 -9 4855.7 1122.57 1
 2 -17 -9 3910.3 1328.22 2
 2 17 -7 4343.64 1206.3 3
 2 -17 -7 3251.59 1287.26 2
 2 17 -7 2907.61 881.356 1
 -2 17 -7 4126.47 1020.59 1
 -2 -17 -7 3615 1135.1 2
 -2 17 -7 2244.34 859.842 3
 -2 17 -7 1910.82 475.051 5
 -2 17 -5 -386.022 517.072 1
 2 17 -5 1013.78 682.712 3
 2 -17 -5 331.463 624.768 2
 -2 -17 -5 120.786 336.851 2
 -2 -17 -5 483.349 290.034 8
 2 17 -5 837.854 501.938 1
 -2 -17 -3 690.194 372.246 2
 -2 17 -3 1608.88 663.053 1
 2 -17 -3 2608.86 1083.11 2
 2 17 -3 1833.18 716.706 1
 2 -17 -1 35620 3823.2 2
 -2 -17 -1 38773 3796.88 2
 2 17 -1 29920.7 2696.74 1
 -2 17 -1 28553.6 2566.77 1
 2 -17 1 39503 3865.16 2
 2 -17 1 40508.9 4507.12 6
 -2 -17 1 36950.3 3650.93 2
 2 17 1 29779.9 2672.26 1
 -2 17 1 26851.3 2505.4 1
 -2 17 3 881.184 635.66 1
 -2 -17 3 1319.78 831.583 6
 -2 -17 3 1778.69 808.575 2
 2 -17 3 714.965 732.39 6
 2 17 3 2142.81 699.043 1
 -2 17 5 336.293 278.383 1
 -2 -17 5 -182.126 474.758 6
 2 -17 5 -273.397 602.625 6
 2 17 7 3574.05 1048.69 1
 -2 17 7 2853.69 833.112 1
 -2 -17 7 2297.61 884.739 6
 2 -17 7 1688.82 600.797 6
 -2 -17 9 6650.74 1503.14 6
 2 -17 9 6194.23 1378.04 6
 2 17 9 7205.91 1409.54 1
 -2 17 9 7882.49 1453.97 1
 -2 17 11 2535.89 834.588 1
 2 -17 11 1959.32 844.478 6
 2 17 11 2711.27 880.309 1
 -2 -17 11 2830.53 956.23 6
 -2 17 13 538.521 565.003 1
 2 17 13 23.0319 370.5 4
 2 -17 13 1095.85 620.104 6
 -2 -17 13 1422.34 720.091 6
 2 17 13 364.778 359.112 1
 -2 17 15 947.255 502.219 1
 2 17 15 1143.08 721.516 4
 2 17 15 1299.06 646.951 1
 2 -17 15 1553.6 763.234 6
 -2 -17 15 1880.56 920.768 6
 2 17 17 4867.91 1191.59 1
 -2 17 17 5853.36 1355.8 1
 -2 -17 17 3521.84 1167.66 6
 -2 18 -18 212.475 362.231 3
 2 18 -18 1653.33 747.693 5
 -2 18 -18 1471.96 623.83 5
 2 18 -18 891.902 620.848 3
 -2 18 -16 952.784 722.888 3
 -2 -18 -16 2380.81 1081.18 2
 2 18 -16 4050.51 1064.36 5
 -2 18 -16 4214.67 1022.15 5
 2 18 -16 2736.53 1039.7 3
 2 -18 -16 642.088 633.564 2
 2 18 -14 4772.77 1072.39 5
 -2 -18 -14 1652.45 872.03 2
 -2 18 -14 4038.53 997.597 5
 2 -18 -14 666.58 388.067 2
 2 18 -14 3648.09 1154.76 3
 -2 18 -14 2994.64 1001.61 3
 -2 18 -12 935.652 444.497 5
 2 18 -12 1363.95 569.173 5
 2 -18 -12 931.456 514.401 2
 2 18 -12 1104.88 676.066 3
 -2 -18 -12 18.8079 266.319 2
 2 18 -10 588.491 601.762 3
 -2 18 -10 520.887 287.512 1
 -2 -18 -10 -50.512 237.987 2
 2 -18 -10 287.676 427.324 2
 -2 18 -10 105.232 180.727 5
 -2 18 -10 212.226 261.96 3
 2 18 -10 665.616 401.212 5
 2 -18 -8 4843.42 1583.4 2
 -2 18 -8 6012.9 1275.61 1
 -2 -18 -8 5429.24 1537.14 2
 2 18 -8 5707.68 1398.5 3
 -2 18 -8 6501.69 1577.79 3
 2 -18 -6 8338.74 1995.11 2
 -2 18 -6 6971.66 1336.13 1
 2 18 -6 9730.37 1885.12 3
 -2 18 -6 9287.35 1876.72 3
 -2 -18 -6 6831.24 1606.42 2
 2 18 -6 7391.51 1426.67 1
 -2 18 -4 690.307 428.387 1
 2 -18 -4 1368.14 883.178 2
 2 18 -4 484.663 343.237 1
 -2 -18 -4 447.421 534.44 2
 2 18 -4 1310.79 675.656 3
 2 18 -2 1768.98 657.237 1
 2 -18 -2 2942.18 1138.58 2
 -2 18 -2 2049.36 703.812 1
 -2 -18 -2 1615.75 708.022 2
 2 -18 0 194.216 448.425 2
 2 18 0 -202.182 528.754 1
 -2 18 0 -158.911 390.396 1
 -2 -18 0 376.129 514.499 2
 -2 -18 2 2261.22 948.255 2
 -2 -18 2 4099.82 1616.48 6
 2 18 2 1676.44 628.282 1
 2 -18 2 2209.16 873.647 2
 2 -18 2 2888.74 1115.99 6
 -2 18 2 1838.41 678.638 1
 -2 18 4 1192.01 600.796 1
 2 -18 4 140.721 398.147 6
 2 18 4 771.639 450.814 1
 -2 -18 4 296.041 284.13 6
 2 -18 6 6899.37 1567.2 6
 -2 18 6 7171.08 1390.67 1
 2 18 6 8562.7 1610.59 1
 -2 -18 6 6803.42 1655.84 6
 2 18 8 5269.35 1189.76 1
 -2 18 8 5568.48 1275.62 1
 2 -18 8 6228.69 1439.18 6
 -2 -18 8 4305.79 1294.29 6
 -2 18 10 297.427 422.62 1
 2 -18 10 296.032 207.754 6
 2 18 10 253.584 354.451 1
 -2 -18 10 164.962 478.767 6
 -2 18 12 1151.87 492.195 1
 -2 -18 12 624.348 423.936 6
 2 -18 12 703.909 393.652 6
 2 18 12 836.23 441.688 1
 2 -18 14 2695.43 984.408 6
 -2 -18 14 1744.31 777.625 6
 2 18 14 3283.58 972.915 1
 2 18 14 3548.94 1130.65 4
 -2 18 14 3563.66 965.535 1
 2 18 16 2817.97 902.291 1
 2 18 16 3253.23 1157.27 4
 -2 -18 16 3026.51 1085.77 6
 -2 18 16 2600.92 909.036 1
 -2 18 18 127.141 430.109 1
 -2 19 -17 -2.58014 610.278 3
 2 -19 -15 -332.72 735.032 2
 2 19 -15 1359.1 713.01 3
 -2 19 -15 -311.189 851.397 3
 -2 -19 -13 2172.85 1016.21 2
 -2 19 -13 1907.3 948.911 3
 2 19 -13 1562.63 859.314 3
 2 -19 -13 700.138 557.715 2
 -2 -19 -11 920.405 366.254 2
 2 -19 -11 1139.23 709.512 2
 -2 19 -11 359.564 254.911 3
 2 19 -11 849.799 644.491 3
 -2 -19 -9 1326.96 806.718 2
 2 19 -9 2439.77 926.772 3
 2 -19 -9 1517.97 840.327 2
 -2 19 -9 3143.16 1082.32 3
 -2 19 -9 2666.23 818.214 1
 2 19 -7 503.765 224.163 1
 2 19 -7 1204.96 753.139 3
 -2 -19 -7 1072.67 870.79 2
 2 -19 -7 2297.97 1181.52 2
 -2 19 -7 2591.1 1033.76 3
 -2 19 -7 1543.48 625.055 1
 2 19 -5 2676.78 1011.5 3
 -2 19 -5 2141.98 729.726 1
 -2 -19 -5 3132.95 1133.03 2
 2 -19 -5 5138.54 1523.11 2
 2 19 -5 3101.54 949.666 1
 2 19 -3 2454.18 893.325 1
 -2 19 -3 38.8409 450.482 1
 -2 -19 -3 2215.99 936.095 2
 2 -19 -3 3485.36 1275.07 2
 2 -19 -1 2338.61 986.314 2
 -2 19 -1 1729.16 682.825 1
 2 19 -1 764.756 477.253 1
 -2 -19 -1 1059.29 611.162 2
 2 19 1 1220.76 553.812 1
 -2 19 1 466.574 451.589 1
 2 -19 1 1381.17 825.746 2
 -2 -19 1 2495.34 993.851 2
 -2 -19 3 2086.56 901.566 2
 2 -19 3 1973.78 1015.18 6
 2 19 3 1999.06 767.994 1
 -2 19 3 2225.93 789.755 1
 -2 -19 3 3548.1 1378.03 6
 2 -19 3 3696.3 1195.98 2
 -2 -19 5 2371.61 932.297 6
 2 19 5 3418.01 1166.28 1
 2 -19 5 2278.59 959.245 6
 -2 19 5 3299.84 970.61 1
 -2 19 7 1305.02 652.444 1
 -2 -19 7 -105.774 528.314 6
 2 -19 7 1193.97 893.162 6
 2 19 7 1726.62 780.48 1
 -2 19 9 2917.14 907.11 1
 2 -19 9 794.744 540.394 6
 -2 -19 9 1609.38 760.992 6
 2 19 9 2157.09 871.335 1
 -2 19 11 1879.34 788.308 1
 2 19 11 1837.35 805.719 1
 -2 -19 11 1047.62 568.676 6
 2 -19 11 1253.07 655.692 6
 -2 19 13 3822.72 1169.6 1
 -2 -19 13 1814.36 859.527 6
 2 19 13 3256.03 1141.82 1
 2 19 13 2108.19 1014.54 4
 2 -19 13 2122.8 902.393 6
 -2 19 15 85.8791 478.184 1
 2 19 15 -85.187 248.595 1
 2 19 15 133.21 313.262 4
 2 19 17 1070.92 679.969 1
 -2 19 17 557.126 524.287 1
 -2 20 -16 1487.57 961.813 3
 -2 20 -14 532.956 347.705 3
 2 20 -14 659.067 577.343 3
 2 20 -12 -206.456 581.572 3
 -2 -20 -12 669.336 648.576 2
 -2 20 -12 -479.251 522.729 3
 2 -20 -12 -690.359 659.984 2
 2 -20 -10 1322.92 998.29 2
 -2 20 -10 841.666 566.682 1
 -2 -20 -10 326.789 479.724 2
 -2 20 -10 2123.35 1100.25 3
 2 20 -10 315.917 555.89 3
 2 -20 -8 613.939 853.561 2
 -2 20 -8 1630.74 1048.38 3
 -2 20 -8 746.302 498.495 1
 -2 -20 -8 495.246 596.615 2
 2 20 -8 1677.5 880.264 3
 -2 20 -6 2630.93 1124.97 3
 2 -20 -6 2805.22 1257.96 2
 -2 20 -6 2501.15 912.34 1
 2 20 -6 3357.18 1054.25 1
 2 20 -6 3474.51 1247.16 3
 -2 -20 -6 3663.13 1360.06 2
 2 -20 -4 2407.99 1020.54 2
 2 20 -4 2508.48 1076.51 3
 -2 -20 -4 1970.91 942.195 2
 -2 20 -4 1400.6 653.866 1
 2 20 -4 1434.59 726.455 1
 2 -20 -2 1321.87 735.313 2
 -2 20 -2 455.311 347.704 1
 -2 -20 -2 -211.541 524.422 2
 2 20 -2 734.075 614.248 1
 2 20 0 1552.61 667.767 1
 -2 20 0 1123.81 606.768 1
 -2 -20 0 1948.87 855.165 2
 2 -20 0 1873.93 1022.88 2
 2 -20 2 2147.58 818.823 2
 2 20 2 1954.15 970.571 1
 -2 20 2 1924.5 847.8 1
 -2 -20 2 998.842 586.634 2
 2 -20 4 1705.2 1024.71 6
 -2 20 4 2839.29 937.548 1
 -2 -20 4 1711.3 972.841 6
 -2 -20 4 3022.84 1105.96 2
 2 20 4 3884.08 1095.09 1
 -2 -20 6 1906.54 1130.23 6
 2 -20 6 2492.96 1073.42 6
 2 20 6 3566.84 1067.29 1
 -2 20 6 2104.16 877.026 1
 2 -20 8 1152.3 702.732 6
 2 20 8 351.59 309.489 1
 -2 20 8 928.964 589.818 1
 -2 -20 8 317.178 284.738 6
 -2 -20 10 1465.12 923.691 6
 2 -20 10 41.8512 327.269 6
 -2 20 10 1654.01 809.737 1
 2 20 10 1254.71 682.666 1
 -2 20 12 -281.984 317.335 1
 2 20 12 388.683 478.609 1
 -2 -20 12 100.746 314.752 6
 2 -20 12 297.901 686.434 6
 2 20 14 1054.85 791.201 1
 -2 20 14 1257.59 793.915 1
 2 20 14 749.257 767.307 4
 2 20 16 2238.84 998.243 1
 -2 20 16 497.421 558.779 1
 2 21 -13 1896.7 988.186 3
 -2 21 -13 3679.32 1190.55 3
 -2 -21 -11 815.127 290.671 2
 2 -21 -11 1948.86 931.656 2
 2 21 -11 1614.13 762.611 3
 -2 21 -11 1925.1 944.018 3
 -2 21 -9 40.677 326.862 1
 -2 -21 -9 -176.247 376.92 2
 2 -21 -9 78.3654 574.35 2
 -2 21 -9 956.588 724.493 3
 2 21 -9 -158.334 633.566 3
 2 -21 -7 6991.19 1977.26 2
 -2 -21 -7 5406.43 1651.27 2
 -2 21 -7 4351.22 1427.47 3
 2 21 -7 5346.05 1433.7 3
 -2 21 -7 5540.7 1313.88 1
 2 -21 -5 10629.2 2330.19 2
 2 21 -5 6180.3 1581.03 3
 2 21 -5 5642.45 1263 1
 -2 -21 -5 7021.55 1735.1 2
 -2 21 -5 5210.24 1257.02 1
 -2 21 -3 4406.83 1188.04 1
 2 -21 -3 5259.38 1552.73 2
 2 21 -3 4138.65 1155.43 1
 2 21 -3 5002.66 1348.05 3
 -2 -21 -3 3861.69 1168.08 2
 2 -21 -1 3586.77 1233.16 2
 -2 -21 -1 3610.37 1283.48 2
 2 21 -1 2488.69 849.222 1
 -2 21 -1 2063.78 807.677 1
 -2 -21 1 4496.22 1366.76 2
 -2 21 1 3080.13 993.2 1
 2 21 1 3199.69 947.433 1
 2 -21 1 3804.47 1242.3 2
 2 21 3 3716.02 1126.5 1
 -2 -21 3 5128.35 1421.21 2
 2 -21 3 4601.26 1465.06 6
 2 -21 3 6098.15 1555.04 2
 -2 21 3 4108.13 1132.55 1
 2 -21 5 7225.22 1772.6 6
 -2 21 5 6907.29 1503.52 1
 -2 -21 5 7527.04 1675.26 2
 2 21 5 6755.5 1511.36 1
 -2 -21 5 7680.58 1956.9 6
 2 21 7 5325.16 1392.82 1
 -2 21 7 6042.62 1433.44 1
 -2 -21 7 5577.99 1598.68 6
 2 -21 7 3379.37 1209.58 6
 -2 -21 9 370.464 430.059 6
 2 -21 9 365.912 552.576 6
 -2 21 9 -394.357 378.46 1
 2 21 9 312.406 371.507 1
 -2 -21 11 3053.69 1207.1 6
 2 21 11 2793.22 995.901 1
 -2 21 11 4236.56 1240.26 1
 2 -21 11 820.534 533.195 6
 2 21 13 2321.92 893.675 1
 -2 21 13 3557.35 1207.04 1
 2 21 15 417.751 612.191 1
 -2 22 -12 796.902 407.736 3
 -2 22 -10 2020.84 997.426 3
 2 -22 -10 1403.32 716.949 2
 -2 -22 -10 2377.91 1025.79 2
 2 22 -10 1262.96 777.158 3
 2 -22 -8 2453.14 1171.51 2
 -2 22 -8 4298.46 1445.49 3
 -2 22 -8 3889.28 1234.28 1
 2 22 -8 3611.63 1208.33 3
 -2 -22 -8 4576.19 1456.74 2
 2 22 -6 7805.66 1833.62 3
 -2 22 -6 7203.04 1563.15 1
 2 22 -6 6491.1 1476.05 1
 -2 22 -6 8404.15 1991.1 3
 2 -22 -6 6885.56 1895.94 2
 -2 -22 -6 7830.27 1987.44 2
 2 22 -4 1795.39 804.572 1
 2 -22 -4 1767.11 954.033 2
 -2 -22 -4 2210.84 1141.59 2
 -2 22 -4 2136.88 826.485 1
 2 22 -4 3798.58 1275.06 3
 -2 -22 -2 4920.97 1410.86 2
 -2 22 -2 3514.31 1094.55 1
 2 -22 -2 5669.5 1699.94 2
 2 22 -2 5150.21 1308.09 1
 -2 -22 0 2438.94 1142.4 2
 2 22 0 1061.12 625.631 1
 2 -22 0 1476.14 865.847 2
 -2 22 0 -83.1518 464.428 1
 2 -22 2 5339.32 1466.26 2
 -2 22 2 5289.11 1317.66 1
 -2 -22 2 6321.56 1638.04 2
 2 22 2 4992 1349.49 1
 2 -22 4 2897.84 1063.84 2
 -2 22 4 1601.7 716.972 1
 2 22 4 2391.48 878.431 1
 -2 -22 4 2467.77 936.167 2
 2 -22 4 2680.34 1249.52 6
 -2 22 6 5411.82 1358.77 1
 2 -22 6 9284.91 2074.24 6
 -2 -22 6 6506.55 1776.01 6
 2 22 6 7186.45 1620.99 1
 -2 -22 6 8991.1 1809.01 2
 2 -22 8 1604.47 881.982 6
 -2 22 8 4337.82 1264.52 1
 -2 -22 8 2821.81 1156.59 6
 2 22 8 4483.71 1281.57 1
 2 -22 10 2471.94 1000.54 6
 -2 -22 10 1661.64 869.225 6
 -2 22 10 1732.27 925.852 1
 2 22 10 4073.96 1242.85 1
 -2 22 12 208.504 288.053 1
 2 22 12 815.184 467.793 1
 -2 23 -9 2689.38 1095.91 3
 -2 23 -9 3218.74 1041.8 1
 -2 -23 -7 4736.69 1538.56 2
 2 -23 -7 3035.52 1395.72 2
 -2 23 -7 2589.67 1147.2 3
 -2 23 -7 3163.48 1090.59 1
 2 23 -7 3018.98 1114.01 3
 -2 -23 -5 1315.87 932.548 2
 -2 23 -5 22.5424 371.151 1
 2 23 -5 -417.065 512.705 1
 2 -23 -5 72.6878 440.751 2
 2 23 -5 29.115 369.271 3
 -2 23 -5 1619.94 1071.88 3
 2 23 -3 3334.26 1170.5 3
 2 -23 -3 4272.49 1443.53 2
 -2 -23 -3 1437.55 945.584 2
 2 23 -3 1695.85 852.789 1
 -2 23 -3 3386.88 1212.43 1
 -2 -23 -1 18422.2 2850.68 2
 2 -23 -1 18068.6 2906.55 2
 -2 23 -1 12961.7 2129.19 1
 2 23 -1 11831 2084.68 1
 -2 23 1 12339.9 2109.09 1
 2 23 1 15280 2358.17 1
 -2 -23 1 19209.1 2813.52 2
 2 -23 1 17620.4 2817.98 2
 -2 23 3 1727.39 777.921 1
 -2 -23 3 3070.65 1054.24 2
 2 23 3 2010.46 962.558 1
 2 -23 3 3955.85 1208.31 2
 2 -23 5 -672.008 715.748 2
 -2 23 5 676.886 621.598 1
 -2 -23 5 174.846 474.74 6
 2 -23 5 -13.9066 587.565 6
 2 23 5 -1372.6 860.36 1
 -2 -23 5 -248.366 376.853 2
 2 -23 7 2174.63 1005.11 6
 -2 23 7 2093.23 921.166 1
 -2 -23 7 2590.41 1143.55 6
 -2 -23 7 2611.21 913.812 2
 2 23 7 3154.97 1077.09 1
 2 23 9 1814.12 778.646 1
 2 -23 9 2237.31 1057.32 6
 -2 23 9 3513.32 1166.22 1
 -2 24 -8 1986.77 991.217 1
 -2 24 -6 995.06 556.755 1
 2 -24 -4 743.405 516.117 2
 -2 24 -4 1406.93 848.315 1
 -2 -24 -4 1423.03 867.701 2
 2 24 -4 356.933 369.432 1
 2 24 -4 1726.54 901.816 3
 2 24 -2 1232.23 831.069 3
 2 -24 -2 326.633 559.312 2
 -2 -24 -2 -1116.9 762.735 2
 2 24 -2 -243.604 492.164 1
 -2 24 -2 -412.921 488.06 1
 -2 -24 0 752.73 663.497 2
 2 -24 0 304.032 613.533 2
 2 24 0 282.601 387.307 1
 -2 24 0 -171.738 380.13 1
 -2 -24 2 553.044 649.167 2
 2 -24 2 -933.082 736.138 2
 -2 24 2 -312.16 544.654 1
 2 24 2 227.123 445.925 1
 -2 -24 4 2312.91 983.381 2
 2 24 4 2227.31 968.81 1
 -2 24 4 1166.93 833.777 1
 2 -24 4 511.495 405.628 2
 2 -24 6 676.494 654.529 6
 2 -24 6 -301.805 512.894 2
 -2 -24 6 935.918 619.67 2
 -2 -24 8 2898.95 1074.09 2
 -2 25 -7 2740.26 1063.43 1
 -2 25 -5 1529.36 878.942 1
 -2 25 -3 1005.85 618.781 1
 2 25 -3 -31.0517 435.83 1
 -2 25 -1 1057.59 730.907 1
 2 25 -1 2591.19 1072.57 1
 -2 -25 1 3387.64 1217.72 2
 -2 -25 3 1169.36 781.286 2
 -3 0 -23 189.543 418.954 5
 3 0 -23 967.983 740.358 5
 3 0 -21 -302.648 376.04 5
 -3 0 -21 -71.4258 533.997 5
 3 0 -19 369.461 380.865 5
 3 0 -19 378.532 285.621 3
 -3 0 -19 -88.2577 326.519 5
 3 0 -17 310.717 479.801 3
 3 0 -17 921.557 983.796 5
 -3 0 -17 -71.0322 180.722 5
 3 0 -15 762.309 470.912 5
 -3 0 -15 403.406 152.702 5
 3 0 -15 169.767 265.106 3
 -3 0 -15 116.595 162.799 3
 -3 0 -13 95.1223 70.6294 3
 -3 0 -13 -141.361 274.095 5
 3 0 -13 64.7458 310.045 3
 3 0 -11 -155.33 276.727 5
 3 0 -11 15.8278 115.906 3
 -3 0 -11 163.337 284.489 5
 -3 0 -11 3.68738 89.335 3
 -3 0 -9 -3.1069 44.6632 3
 3 0 -9 247.89 195.173 3
 -3 0 -9 209.656 247.839 5
 3 0 -9 82.1724 179.757 5
 3 0 -7 183.322 135.954 3
 -3 0 -7 40.0742 53.8104 3
 -3 0 -7 135.755 159.317 4
 3 0 -7 122.898 217.956 7
 -3 0 -7 185.857 193.037 5
 3 0 -7 195.24 156.237 5
 3 0 -7 1.62894 78.173 2
 -3 0 -5 62.7217 60.0785 3
 3 0 -5 503.532 227.811 7
 -3 0 -5 89.7011 106.195 4
 3 0 -5 21.8021 64.3925 2
 -3 0 -5 229.909 81.1351 1
 3 0 -5 98.2858 99.3827 3
 -3 0 -5 60.6769 149.289 5
 3 0 -5 176.325 117.859 5
 -3 0 -3 210.542 92.6526 4
 -3 0 -3 11.958 117.362 5
 3 0 -3 129.676 62.1844 2
 3 0 -3 142.249 119.521 5
 -3 0 -3 211.441 92.9987 8
 3 0 -3 223.89 114.613 7
 3 0 -3 140.826 84.4266 3
 -3 0 3 299.615 115.176 7
 -3 0 3 157.909 69.0244 2
 -3 0 3 168.509 98.1183 5
 3 0 3 202.755 91.2667 8
 3 0 3 58.2143 46.083 2
 -3 0 3 103.364 78.9177 3
 3 0 3 174.582 127.298 4
 -3 0 5 111.951 112.26 5
 3 0 5 76.3453 88.6321 4
 3 0 5 19.974 35.6208 3
 -3 0 5 50.5376 84.0137 3
 -3 0 5 169.112 97.5463 2
 3 0 5 185.923 161.975 5
 3 0 5 200.411 116.543 8
 3 0 5 70.9347 69.1137 2
 -3 0 5 142.932 125.532 7
 3 0 7 75.313 118.281 2
 -3 0 7 63.6877 101.362 7
 3 0 7 176.983 148.157 8
 -3 0 7 53.2963 94.0214 3
 3 0 7 182.941 112.693 4
 3 0 7 33.5885 50.799 3
 -3 0 7 307.033 198.168 5
 -3 0 7 42.5251 112.872 2
 3 0 7 254.267 170.506 5
 -3 0 7 144.741 124.497 4
 3 0 9 312.738 178.764 4
 -3 0 9 74.3964 99.1841 1
 3 0 9 93.2871 101.614 3
 -3 0 9 179.259 205.998 4
 3 0 9 327.043 195.668 8
 -3 0 11 99.7981 84.5191 1
 -3 0 11 366.239 241.207 4
 3 0 11 69.1634 141.177 3
 3 0 11 -75.4517 202.787 4
 3 0 13 15.628 208.986 4
 -3 0 13 66.1826 67.1467 1
 -3 0 13 -106.232 301.272 4
 3 0 13 -28.6754 88.58 3
 3 0 15 -269.4 260.322 4
 -3 0 15 282.492 313.245 4
 -3 0 15 92.4004 100.16 1
 -3 0 17 339.438 391.694 4
 3 0 17 60.6503 197.144 4
 -3 0 19 143.497 138.808 4
 3 0 19 194.174 372.434 4
 -3 0 21 31.6963 328.081 4
 3 0 21 -87.7971 190.771 4
 3 0 23 255.014 385.289 4
 -3 0 23 666.283 439.837 4
 3 0 25 362.982 308.296 4
 3 -1 -22 4027.12 1159.33 5
 -3 -1 -22 3737.42 1125.63 5
 3 1 -22 2911.11 1073.03 5
 -3 1 -22 3300.51 1024.85 5
 3 -1 -20 6876.14 1369.74 5
 3 1 -20 6078.18 1294.51 5
 3 1 -20 5509.53 954.462 3
 -3 -1 -20 5448.79 1304.12 5
 -3 1 -20 6007.35 1330.13 5
 -3 -1 -18 3776.22 1040.13 5
 3 1 -18 1877.52 550.308 3
 -3 1 -18 2191.79 504.317 3
 3 -1 -18 1131.22 474.185 5
 -3 1 -18 1564.23 785.411 5
 3 1 -18 1771.9 550.184 5
 3 -1 -16 9957.05 1493.4 5
 -3 1 -16 10273.8 1549.88 5
 -3 -1 -16 8915.54 1405.36 5
 3 1 -16 11262.3 1231.24 3
 3 -1 -16 8859.79 1061.66 3
 3 1 -16 10389.1 1472.28 5
 -3 1 -16 9787.23 953.571 3
 3 -1 -14 3740.25 808.078 5
 3 1 -14 3731.05 654.127 3
 3 1 -14 3569.26 828.728 5
 3 -1 -14 3943.22 632.786 3
 -3 1 -14 4160.9 938.563 5
 -3 -1 -14 5710.76 1218.99 5
 -3 1 -14 3687.21 552.908 3
 -3 1 -12 13422.9 938.772 3
 -3 -1 -12 13674.6 1467.32 5
 3 -1 -12 12779 1139.6 3
 3 1 -12 11955.2 1085.04 3
 3 1 -12 13560.1 1414.46 5
 3 -1 -12 13763.9 1393.56 5
 3 -1 -10 10179.8 1117.56 5
 3 1 -10 9521.48 907.984 3
 3 -1 -10 9306.12 903.113 2
 -3 -1 -10 9806.41 528.918 1
 -3 -1 -10 9867.52 1122.09 5
 -3 -1 -10 9485.24 676.065 3
 -3 1 -10 11439.3 1226.82 5
 -3 1 -10 9945.07 727.217 3
 3 1 -10 9803.15 1112.16 5
 3 -1 -10 9723.08 888.91 3
 -3 1 -8 26599.9 1598.61 4
 -3 1 -8 29996 1950.8 5
 3 -1 -8 24754.4 1513.93 5
 3 1 -8 22867.5 1250.59 3
 -3 -1 -8 24944.9 1448.39 2
 -3 -1 -8 23151 833.639 1
 -3 -1 -8 23194.7 911.956 3
 3 -1 -8 26800.4 1371.28 2
 3 1 -8 25516.6 1574.44 5
 3 -1 -8 26808 1346.82 3
 -3 -1 -8 24659.6 1584.48 5
 -3 1 -8 25911.3 1035.18 3
 3 -1 -6 54507.2 1656.47 2
 -3 1 -6 54253.4 1235.61 3
 -3 -1 -6 50833.6 1211.51 1
 3 -1 -6 56162.8 2150.23 7
 -3 -1 -6 54175.5 2049.22 5
 3 1 -6 55755.7 2022.98 5
 3 1 -6 53904.7 2003.89 7
 3 -1 -6 56625.7 1722.38 3
 3 -1 -6 53712 2048.74 5
 -3 -1 -6 55918.2 1875.51 2
 3 1 -6 54702 1730.5 3
 -3 -1 -6 52940.3 2037.59 4
 -3 1 -6 64256 2297.22 5
 -3 1 -6 57406.5 2015.31 4
 -3 1 -4 4982.28 306.211 3
 3 1 -4 5196.69 457.863 3
 -3 -1 -4 4801.74 439.665 8
 3 -1 -4 4800.6 481.184 5
 -3 1 -4 6371.94 617.214 5
 3 -1 -4 4781.68 563.69 7
 3 1 -4 4787.41 504.525 7
 3 1 -4 5337.73 547.562 5
 -3 -1 -4 4922.77 522.817 4
 -3 -1 -4 4913.15 533.726 5
 3 -1 -4 4656.93 393.381 2
 3 -1 -4 5192.31 456.397 3
 -3 -1 -4 5075.62 404.934 1
 -3 -1 -4 5167.13 472.828 2
 -3 1 -4 5211.89 515.204 4
 -3 -1 -2 12653.4 584.862 2
 -3 -1 -2 13140.4 655.664 4
 3 -1 2 13377 634.541 4
 -3 -1 2 13569 720.146 7
 -3 1 2 12766.9 511.747 8
 3 1 2 13057.1 559.711 8
 -3 1 2 13737.2 574.088 2
 -3 1 2 12650.6 680.773 5
 3 -1 2 13170 658.257 8
 -3 1 2 14844.8 791.882 7
 -3 -1 2 12972.7 583.772 6
 -3 1 2 14338.4 625.409 3
 3 1 4 4721.34 498.726 4
 3 -1 4 5268.52 524.49 8
 -3 -1 4 4719.98 449.749 3
 -3 1 4 4866.71 411.162 2
 3 1 4 5550.96 489.552 2
 -3 1 4 4734.83 488.251 5
 -3 -1 4 4953.79 537.145 5
 -3 -1 4 5101.91 495.443 7
 -3 1 4 5525.96 480.398 3
 3 -1 4 6308.41 584.967 5
 3 -1 4 5081.63 482.712 4
 3 1 4 5110.23 408.769 8
 -3 -1 4 4722.58 360.607 2
 -3 1 4 4643.56 512.429 7
 3 1 6 53984.8 1120.52 3
 -3 -1 6 51825.2 1564.31 4
 -3 1 6 60245.3 2166 7
 -3 1 6 52773.3 1909.17 5
 -3 -1 6 57704.9 1969.4 7
 -3 -1 6 54972.3 2016 5
 -3 -1 6 55301.3 1733.9 3
 3 -1 6 57067.8 1813.38 2
 -3 -1 6 54603.8 1572.22 2
 -3 1 6 55235.6 1709.62 3
 3 -1 6 54856.9 1338.35 3
 3 1 6 52907.3 1947.09 5
 -3 1 6 52838.8 1477.83 1
 3 1 6 55571.1 1829.29 2
 3 1 6 50523.8 1524.98 8
 -3 1 6 54457.9 1651.05 2
 3 1 6 56907.3 2009.25 4
 3 -1 6 59636 2097.41 5
 3 -1 6 56615.9 1849.38 4
 -3 -1 8 21867.9 1205.11 4
 3 1 8 22709.2 1166.6 8
 3 -1 8 23644.8 1416.24 4
 -3 -1 8 25199.9 1307.41 3
 3 1 8 22516.9 869.073 1
 3 1 8 24537 1503.14 4
 -3 1 8 28085.9 1386.86 3
 3 1 8 23348.4 917.414 3
 -3 1 8 24351.3 1283.5 2
 -3 1 8 24183 1509.72 4
 -3 -1 8 23335 1437.14 7
 -3 1 8 23413.9 1062.99 1
 -3 -1 8 23635.2 1227.67 2
 3 -1 8 25026.1 1059.47 3
 -3 -1 10 9371.86 879.164 4
 3 -1 10 8709.92 915.826 4
 3 1 10 8496.5 789.092 8
 3 1 10 8752.42 663.897 3
 3 -1 10 8369.37 694.001 3
 -3 1 10 8906.01 717.366 1
 3 1 10 8511.43 978.613 4
 -3 1 10 8929.54 1010.17 4
 -3 1 12 11969.2 889.281 1
 -3 -1 12 12000 779.974 1
 -3 -1 12 13033.6 1157.74 4
 3 -1 12 12148.5 1230.92 4
 3 -1 12 13801.5 1022.81 3
 -3 1 12 13623.8 1336.73 4
 3 1 12 11365.6 1234.56 4
 3 1 12 12163 885.197 3
 3 -1 14 4978.3 842.344 4
 -3 1 14 4410.41 818.505 4
 -3 -1 14 4161.02 475.123 1
 -3 1 14 3850.06 503.34 1
 -3 -1 14 4562.98 745.847 4
 3 1 14 4377.16 804.509 4
 -3 1 16 5349.54 600.607 1
 3 1 16 8990.06 1279.65 4
 3 -1 16 8875.8 1177.51 4
 -3 1 16 9580.32 1293.5 4
 -3 -1 16 10483.9 1218.38 4
 -3 1 18 1216.74 509.894 4
 3 -1 18 2726.82 713.043 4
 -3 -1 18 1137.39 389.524 4
 3 1 18 1399.31 509.797 4
 3 1 20 5735.77 1109.33 4
 -3 -1 20 4299.44 871.385 4
 -3 1 20 5711.88 1077.18 4
 3 -1 20 5967 1110.35 4
 -3 1 22 2592.16 747.037 4
 3 -1 22 3284.97 834.195 4
 -3 -1 22 3231.44 759.844 4
 3 1 22 3632.25 956.774 4
 -3 -1 22 4046.54 980.044 6
 -3 -1 24 4253.85 1079.44 6
 3 1 24 4213.28 1036.71 4
 3 -1 24 4620.11 1083.4 4
 -3 -2 -23 155.694 340.368 5
 3 2 -23 -472.263 609.586 5
 3 -2 -23 311.768 495.25 5
 -3 2 -23 -579.881 384.051 5
 3 -2 -21 465.761 387.471 5
 3 2 -21 376.428 208.669 5
 -3 2 -21 425.936 362.185 5
 -3 -2 -21 -36.6696 402.628 5
 3 2 -21 158.733 138.676 3
 3 2 -19 2979.6 701.548 3
 -3 -2 -19 2390.31 812.101 5
 -3 2 -19 2939.81 906.895 5
 3 2 -19 2060.97 687.746 5
 3 -2 -19 2818.13 743.762 5
 -3 2 -17 562.021 498.964 5
 3 2 -17 1017.53 484.786 5
 3 2 -17 749.453 305.71 3
 3 -2 -17 1084.82 549.481 5
 -3 -2 -17 200.62 353.088 5
 -3 2 -17 592.755 266.453 3
 -3 2 -15 659.138 284.803 3
 3 2 -15 267.2 155.454 3
 -3 -2 -15 680.302 431.993 5
 3 -2 -15 459.353 265.172 5
 3 2 -15 468.097 401.067 5
 -3 2 -15 575.133 389.2 5
 3 2 -13 154.896 301.166 5
 -3 2 -13 605.786 391.705 5
 -3 -2 -13 364.814 621.122 5
 -3 2 -13 100.358 92.4995 3
 3 2 -13 299.644 136.578 3
 3 -2 -13 269.502 220.469 2
 3 -2 -13 362.159 248.377 5
 -3 -2 -11 19389.5 1669.52 5
 3 -2 -11 18000.8 1332.17 2
 -3 2 -11 18094.2 1070.23 3
 3 -2 -11 18558.9 1560.38 5
 3 -2 -11 19303.7 1305.88 3
 -3 2 -11 17933.7 1629.42 5
 3 2 -11 18184.3 1294.67 3
 -3 -2 -11 17742.7 878.483 1
 -3 -2 -11 18566.4 1484.35 2
 3 2 -11 19850.9 1678.01 5
 3 2 -9 11451.9 1142.26 5
 3 2 -9 11590.9 955.374 3
 -3 2 -9 11346.5 1144.32 5
 -3 2 -9 9831.06 713.316 3
 3 -2 -9 11633.6 970.224 2
 -3 -2 -9 11127.3 699.181 1
 -3 -2 -9 12880.9 1236.3 5
 -3 -2 -9 11436.4 1059.38 2
 3 -2 -9 11699.3 1125.98 5
 3 -2 -9 11538 913.343 3
 -3 -2 -7 19547.4 1378.87 4
 -3 2 -7 20909.1 1378.63 5
 -3 -2 -7 20414.2 1238.57 2
 3 -2 -7 18647.8 1085.75 2
 3 2 -7 18728.3 1262.17 7
 3 -2 -7 18330.5 1052.36 3
 -3 2 -7 18617.9 1226.67 4
 3 2 -7 19456.1 1322.08 5
 -3 -2 -7 20228.5 1348.96 5
 3 -2 -7 19451.3 1237.09 5
 -3 -2 -7 18295.2 870.169 1
 -3 2 -7 17185.9 849.758 3
 3 -2 -7 19373.2 1402.77 7
 3 2 -7 19484 1122.09 3
 3 2 -5 33734.8 1393.91 7
 3 -2 -5 35860.1 1642.58 7
 -3 -2 -5 34614.2 1189.9 1
 3 -2 -5 35907.7 1411.15 5
 3 -2 -5 33414.5 1256.52 2
 -3 -2 -5 37677.8 1599.66 5
 3 2 -5 37761.7 1583.03 5
 -3 2 -5 35781.2 1445.08 4
 3 2 -5 35395.1 1362.36 3
 -3 -2 -5 35009 1598.64 4
 -3 -2 -5 35278.2 1418.35 2
 -3 2 -5 34539 1105.72 3
 -3 2 -5 37079.7 1580.98 5
 -3 -2 -5 33936.4 1225.21 8
 3 2 -3 49231.6 1391.54 7
 -3 2 -3 50790.5 1541.18 5
 -3 2 -3 47493.9 917.29 1
 -3 -2 -3 49991.1 1412.17 2
 3 2 -3 49862.4 1579.53 5
 3 -2 -3 48838.1 1369.02 2
 3 2 -3 47067 1365.12 6
 -3 -2 -3 48748.7 1212.85 8
 3 -2 -3 48854.4 1637.12 7
 -3 -2 -3 48670 1534.24 4
 -3 -2 -3 49294.1 1469.35 1
 -3 2 -3 47889 1403.87 4
 3 -2 -3 49304.8 1347.13 5
 3 2 -3 50011.9 1420.86 3
 -3 -2 -1 39180.5 1034.51 2
 3 2 -1 38146.2 1088.51 3
 -3 -2 -1 37426.4 1030.68 4
 3 -2 -1 39663.8 1322.94 7
 -3 2 -1 38921 1127.33 8
 -3 2 1 39224.6 875.829 8
 -3 -2 1 37626.2 1321.89 7
 3 2 1 37936.8 1011.45 8
 -3 -2 1 37860 1974.66 6
 -3 -2 3 50388.6 1426.72 6
 -3 2 3 50259.2 1408.83 2
 -3 -2 3 48617.1 1576.72 5
 -3 2 3 48051.6 1339.98 3
 3 2 3 52430.3 1592.16 4
 3 -2 3 51363.1 1384.55 4
 -3 -2 3 50213.6 1371.19 7
 -3 2 3 51390.8 1351.45 1
 -3 2 3 50810 1653.39 7
 -3 2 3 49903.8 933.183 8
 3 2 3 51465.5 1446.44 1
 -3 -2 3 48794.2 1393.21 3
 3 2 3 47822.1 1352.96 2
 3 2 3 49147.9 1105.24 8
 -3 2 3 47306.9 1309.98 5
 3 -2 5 36420.1 1344.88 4
 -3 2 5 35589.3 1295.72 3
 3 2 5 35474.8 1081.22 8
 -3 -2 5 38431.8 1424.64 7
 -3 -2 5 35210.5 1555.52 5
 -3 2 5 36333.3 1331.24 2
 -3 2 5 34103.3 1390.27 5
 -3 -2 5 36648.1 1014.16 4
 3 2 5 35844.2 1401.25 2
 -3 -2 5 36998.9 1381.32 3
 -3 2 5 35467.7 1257.53 1
 -3 -2 5 37642.3 1330.14 6
 3 2 5 33544.8 843.679 3
 3 2 5 37003 1592.63 4
 3 2 5 34942.8 1231.53 1
 -3 2 5 37474.4 1634.22 7
 3 -2 5 33980.6 1468.55 5
 -3 -2 7 19197.8 947.431 4
 -3 2 7 20506.6 1139.74 2
 3 2 7 20419.4 1352.49 4
 3 2 7 18785.1 771.944 3
 -3 2 7 19014.5 1070.45 3
 3 2 7 20405.5 1285.53 5
 3 -2 7 18968.1 1110.73 4
 3 2 7 19255.4 937.364 1
 -3 2 7 18837.7 1208.11 5
 -3 -2 7 20319.4 1139.9 3
 3 2 7 19323.9 921.944 8
 3 -2 7 17563.1 943.101 3
 -3 -2 7 19238.2 1028.16 2
 -3 -2 7 19431.6 1190.94 7
 -3 2 7 19715.3 1348.8 7
 -3 2 7 17838.6 968.742 1
 -3 -2 9 11170.6 857.746 4
 3 2 9 10873.1 692.665 3
 3 -2 9 11738.6 984.106 4
 3 2 9 11674.8 755.3 1
 3 2 9 11550.1 819.162 8
 3 2 9 11589.9 1147.89 4
 -3 2 9 10802.3 819.998 1
 3 -2 9 12316.1 860.368 3
 3 -2 11 19093.8 1379.3 4
 -3 -2 11 17871.7 1221.01 4
 3 2 11 18234.8 1562.52 4
 -3 2 11 17667.1 1095.73 1
 3 2 11 19280.3 1003.41 1
 3 2 11 18046.9 1134.17 8
 3 -2 11 17220 1124.15 3
 -3 2 11 16795.8 1494.26 4
 3 2 11 16971.8 983.476 3
 3 2 13 -218.418 322.214 4
 -3 2 13 199.135 166.608 1
 3 -2 13 242.246 279.327 4
 -3 -2 13 292.96 232.617 4
 3 2 13 130.475 129.31 1
 -3 -2 13 391.985 149.354 1
 -3 2 13 231.918 224.418 4
 3 2 13 55.5755 97.2655 3
 -3 2 15 255.007 176.358 4
 -3 2 15 136.357 100.484 1
 -3 -2 15 186.629 93.6074 1
 3 -2 15 114.226 191.186 4
 -3 -2 15 300.886 222.805 4
 3 2 15 574.166 321.235 4
 3 -2 17 596.258 339.501 4
 3 2 17 524.214 295.021 4
 -3 -2 17 483.809 292.514 4
 -3 2 17 467.263 339.276 4
 -3 -2 19 2726.4 678.676 4
 3 2 19 2127.13 656.683 4
 3 -2 19 3217.4 767.994 4
 -3 2 19 2142.37 704.289 4
 -3 -2 21 35.4938 274.981 4
 -3 2 21 388.776 256.586 4
 3 2 21 14.9561 270.288 4
 -3 -2 21 459.239 279.432 6
 3 -2 21 751.131 447.463 4
 3 2 23 124.999 346.216 4
 3 -2 23 322.74 351.638 4
 -3 2 23 -328.388 459.773 4
 -3 -2 23 474.06 453.933 6
 3 2 25 1733.54 589.107 4
 3 -3 -22 900.929 595.494 5
 3 3 -22 1361.15 722.537 5
 -3 -3 -22 876.353 603.959 5
 -3 3 -22 1172.81 600.575 5
 3 3 -22 843.319 427.712 3
 3 -3 -20 2298.72 902.406 5
 -3 3 -20 2911.64 868.135 5
 3 3 -20 2669.12 859.765 5
 -3 -3 -20 2476.87 848.731 5
 3 3 -20 1943.07 629.496 3
 3 3 -18 3918.47 995.836 5
 3 -3 -18 2881.57 896.221 5
 -3 3 -18 2952.95 586.966 3
 -3 -3 -18 3731.04 980.627 5
 -3 3 -18 2392.96 820.579 5
 3 3 -18 2758.5 691.999 3
 -3 3 -16 1497.14 395.093 3
 3 3 -16 1819.42 647.18 5
 -3 -3 -16 2221.88 642.576 5
 -3 3 -16 928.617 455.194 5
 3 -3 -16 1787.08 598.981 5
 3 3 -16 1192.15 362.442 3
 -3 -3 -14 535.017 367.218 2
 3 3 -14 73.2751 233.377 5
 3 -3 -14 376.726 254.426 5
 -3 3 -14 578.44 323.495 5
 3 -3 -14 231.342 248.229 2
 3 3 -14 293.682 167.383 3
 -3 3 -14 357.181 245.822 3
 -3 -3 -14 43.5231 219.916 5
 3 -3 -12 52931.8 2716.99 5
 3 3 -12 53884.3 2918.12 5
 3 -3 -12 49953.1 2414.79 2
 3 3 -12 48980.2 2273.86 3
 -3 -3 -12 51896.5 2812.82 5
 -3 3 -12 49199.6 1936.82 3
 -3 3 -12 56008.2 3000.49 5
 -3 -3 -12 54916.7 2684.74 2
 -3 -3 -12 48070.1 1691.08 1
 -3 3 -10 107393 3754.69 5
 3 3 -10 96996.8 2969.75 3
 -3 -3 -10 112832 3512.41 2
 -3 -3 -10 102736 3601.68 5
 -3 3 -10 95438.3 2502.83 3
 3 3 -10 105621 3691.87 5
 -3 -3 -10 99047.8 2430.89 1
 3 -3 -10 101421 3362.4 5
 3 -3 -10 98363.4 3099.64 2
 -3 3 -8 24345.2 1601.05 5
 3 3 -8 24938.6 1618.47 5
 -3 -3 -8 22986.7 1135.73 1
 3 -3 -8 23901.6 1388.17 2
 -3 3 -8 22929.1 1459.65 4
 -3 -3 -8 25828.5 1533.08 2
 -3 -3 -8 23291 1522.33 5
 -3 3 -8 22321.1 1127.8 3
 3 3 -8 22696.4 1338.25 3
 3 -3 -8 23536.6 1433.98 5
 -3 -3 -6 101984 2719.12 2
 3 -3 -6 95992.4 2461.31 2
 3 -3 -6 87054 2376.67 5
 3 -3 -6 99663.8 3038.07 7
 -3 3 -6 98520.2 2274.8 3
 -3 -3 -6 94092.3 2247.3 1
 3 3 -6 105856 2933.31 5
 3 3 -6 98494.9 2531.66 7
 -3 3 -6 98799 2839.94 5
 3 3 -6 102089 2585.73 3
 -3 -3 -6 98799.8 2769.33 5
 -3 -3 -6 96390.6 2043.53 8
 -3 3 -6 101276 2641.47 4
 3 -3 -4 29296.5 1278.18 2
 -3 3 -4 30888.5 1254.88 4
 -3 -3 -4 29700.8 1284.84 2
 3 -3 -4 29129.1 1166.32 1
 -3 -3 -4 29756.5 999.128 8
 -3 3 -4 29562 847.44 1
 -3 -3 -4 29456.8 1332.35 5
 3 3 -4 28848 1109.81 7
 3 3 -4 30943.6 1305.74 6
 3 3 -4 30207.8 1295.52 3
 3 -3 -4 29667.5 1132.07 5
 3 3 -4 29633.6 1364.02 5
 3 -3 -4 30194.6 1431.64 7
 3 3 -4 28896.5 722.108 4
 -3 -3 -4 28713.5 1242.9 1
 -3 3 -4 31463 1326.41 5
 3 3 -2 40168.1 1250.42 7
 3 3 -2 41540.2 1495.31 5
 3 -3 -2 39706.7 887.928 8
 -3 3 -2 39807.8 1191.72 6
 -3 3 -2 40474.5 1109.43 1
 3 -3 -2 43040.6 1465.56 7
 3 3 -2 43790.7 1437.5 3
 -3 -3 -2 42363.1 1383.65 2
 3 -3 -2 39225.1 1268.9 1
 -3 -3 -2 42990.2 1144.35 8
 -3 -3 -2 42788.2 1515.69 1
 -3 3 -2 42320.4 1240.82 5
 3 -3 -2 38125 1785.14 2
 3 3 -2 33990.9 1667.73 6
 -3 3 -2 41970.1 1442.39 4
 -3 3 0 40184.9 1199.5 1
 -3 3 0 39461.3 1692.13 7
 3 -3 0 40890.8 1398.03 7
 -3 3 0 38252 1298.01 6
 -3 -3 0 39791.7 1399.25 1
 -3 -3 0 38383 1537.24 2
 3 3 0 48109.2 3244.36 6
 3 -3 0 38299.5 1086.94 8
 3 3 0 39156.8 1873.33 2
 3 -3 0 43891.3 1247.84 1
 3 3 0 39505 1339.1 3
 -3 -3 2 39076.7 1275.42 7
 3 -3 2 44703.1 1130.32 1
 3 3 2 42479.6 1479.58 1
 -3 3 2 41898.6 864.131 8
 -3 3 2 42683.4 1339.05 1
 -3 3 2 43301.6 1477.79 7
 3 3 2 43605.7 1442.67 4
 3 3 2 44141.9 1363.48 2
 -3 -3 2 43358.9 1428.79 3
 3 -3 2 41501.2 1370.05 4
 -3 -3 2 40637.8 1463.56 5
 3 -3 2 40801.9 1184.81 6
 3 3 2 41957.8 1075.65 8
 -3 -3 2 37570.3 1746.78 6
 -3 3 2 32156.1 1655.1 2
 -3 3 2 38511.1 998.234 5
 -3 3 4 28678.4 644.222 8
 -3 3 4 30390.5 1308.83 2
 3 3 4 28134.9 845.667 8
 -3 -3 4 31030.3 1300.78 6
 -3 3 4 27371.3 1081.56 5
 -3 -3 4 28044.6 1228.81 3
 -3 3 4 30979.4 1446.26 7
 3 3 4 29472 1244.64 2
 3 -3 4 27958.4 1133.3 4
 3 -3 4 26812.8 753.824 1
 3 -3 4 27859.5 1240.64 5
 3 3 4 27877.7 1390.32 4
 -3 -3 4 29616.4 1089.32 7
 -3 -3 4 26933.9 1310.47 5
 -3 -3 4 28060.1 614.282 4
 3 3 4 28650.1 1231.57 1
 -3 3 4 28853.6 1200.31 1
 3 3 6 100249 2369.02 1
 -3 3 6 104959 2597.27 2
 3 3 6 101489 2617.13 2
 -3 3 6 102652 2991.26 7
 -3 -3 6 104277 2462.43 7
 -3 3 6 97650.1 2357.4 3
 -3 -3 6 98028 1724.75 4
 -3 -3 6 98851 2505.76 3
 -3 -3 6 90964 2726.07 5
 -3 3 6 98190.2 2369.34 1
 -3 -3 6 99608.2 2496.07 6
 3 3 6 93707.6 1757 8
 3 -3 6 94405.7 2660.43 5
 3 -3 6 98867.5 2355.52 4
 -3 3 6 99508.3 2487.8 5
 3 3 6 99642.7 2980.69 4
 3 -3 8 22995.1 1258.97 3
 3 3 8 23853.5 1657.59 4
 3 -3 8 25064.4 1328.46 4
 -3 3 8 23212.6 1416.27 5
 -3 -3 8 22760.3 1335.4 7
 -3 3 8 23425 1264.21 3
 3 3 8 22989.6 989.986 8
 3 3 8 22039.5 1144.03 1
 -3 3 8 22006.5 1210.22 1
 3 3 8 22044.8 945.245 3
 -3 -3 8 24475.1 1361.38 6
 -3 -3 8 22680.9 1045.86 4
 3 3 10 98888.3 2269.08 3
 -3 3 10 101977 2755.4 1
 -3 -3 10 102837 3028.4 6
 3 3 10 95861.8 2316.81 8
 -3 -3 10 103881 2622.82 4
 3 -3 10 103935 2990.35 4
 3 -3 10 99069.5 2802.39 3
 3 3 10 99693.5 3657.73 4
 3 3 10 96761.8 2494.65 1
 3 3 12 47993.6 2732.35 4
 3 3 12 49189.3 1782.46 3
 -3 3 12 49541.7 2010.14 1
 -3 -3 12 52331.3 2369.45 6
 -3 3 12 50900.7 2833.33 4
 3 3 12 47806.1 1802.82 8
 3 -3 12 52121.3 2331.62 4
 3 3 12 51229.4 1873.03 1
 -3 -3 12 50795.5 2068.62 4
 -3 3 14 370.654 259.375 1
 3 3 14 221.001 78.4019 1
 -3 3 14 392.783 273.402 4
 -3 -3 14 715.866 298.526 4
 -3 -3 14 167.538 122.367 6
 -3 -3 14 291.95 135.341 1
 3 3 14 127.329 303.763 4
 3 -3 14 562.6 276.136 4
 -3 -3 16 1742.52 486.182 4
 -3 -3 16 1261.44 430.386 6
 -3 3 16 1302.77 545.477 4
 -3 3 16 858.007 301.022 1
 3 -3 16 1044 343.591 4
 3 3 16 1444.34 563.194 4
 -3 3 18 3189.56 857.869 4
 -3 -3 18 3439.18 708.63 4
 3 -3 18 3154.57 727.488 4
 3 3 18 3817.32 897.032 4
 -3 -3 18 3112.42 700.176 6
 3 3 20 1559.87 534.953 4
 -3 3 20 2250.97 802.109 4
 -3 -3 20 1937.8 540.148 4
 -3 -3 20 2363.41 726.145 6
 3 -3 20 3263.94 766.933 4
 3 -3 22 907.291 432.946 4
 3 3 22 950.825 421.911 4
 -3 -3 22 889.171 454.264 6
 -3 3 22 616.165 293.278 4
 3 3 24 1318.14 693.251 4
 -3 -3 24 927.701 516.109 6
 -3 3 24 559.216 271.017 4
 -3 -4 -23 -71.529 340.432 5
 3 -4 -23 908.491 578.982 5
 3 4 -21 3174.16 815.783 3
 -3 -4 -21 3183.33 1041.03 5
 -3 4 -21 1920.72 915.572 5
 3 -4 -21 2269.44 758.943 5
 3 4 -21 2260.55 818.26 5
 3 4 -19 2966.96 938.841 5
 -3 4 -19 3054.95 948.052 5
 -3 -4 -19 2350.17 884.297 5
 3 -4 -19 2566.98 899.099 5
 -3 4 -19 1937.44 546.826 3
 3 4 -19 1898.19 565.321 3
 -3 -4 -17 1022.98 408.8 5
 -3 4 -17 939.321 453.311 5
 3 -4 -17 1612.4 544.944 5
 3 -4 -17 1168.97 479.4 2
 3 4 -17 1292.32 474.646 3
 -3 4 -17 1106.21 310.509 3
 3 4 -17 2207.35 757.59 5
 3 4 -15 1292.41 558.882 5
 -3 4 -15 1623.58 405.598 3
 3 -4 -15 917.539 413.145 2
 -3 -4 -15 1844.16 589.391 5
 3 -4 -15 1113.37 449.621 5
 -3 4 -15 1160.58 405.224 5
 -3 -4 -15 841.966 381.725 2
 3 4 -15 1004.59 321.168 3
 -3 4 -13 18945 1832.83 5
 -3 -4 -13 17027.9 1138.42 1
 -3 4 -13 16035.3 1209.47 3
 3 4 -13 20164 1884.07 5
 -3 -4 -13 16319 1649.03 5
 3 -4 -13 17058.3 1517.3 2
 -3 -4 -13 17785 1625.9 2
 3 -4 -13 16947 1588.98 5
 3 4 -13 16834.1 1408.48 3
 3 4 -11 60592.9 2555.78 3
 3 -4 -11 67445.4 2901.93 5
 3 -4 -11 62694 2690.02 2
 -3 4 -11 67150.4 3138.24 5
 -3 -4 -11 66465.4 2906.96 2
 -3 -4 -11 60675.4 2139.42 1
 3 4 -11 69031.5 3189.41 5
 -3 4 -11 61381.6 2230.53 3
 -3 -4 -11 61894.2 2945.17 5
 -3 4 -9 31602.8 1520.54 3
 3 4 -9 30769.9 1728.36 3
 3 4 -9 35234.1 2086.33 5
 -3 -4 -9 32833 1914.14 5
 -3 -4 -9 31607.2 1507.63 1
 -3 4 -9 35070.1 2042.31 5
 3 -4 -9 32490.1 1764.37 2
 -3 -4 -9 33718.5 1914.76 2
 3 -4 -9 33922.4 1818.93 5
 3 4 -7 15946.3 1145.78 3
 3 -4 -7 14482.7 973.644 1
 -3 4 -7 15399.1 1122.15 4
 3 4 -7 14693.3 841.697 4
 -3 4 -7 15172.2 1038.57 3
 3 -4 -7 15305.1 1282.58 7
 -3 -4 -7 14749.8 992.136 1
 -3 -4 -7 15563.1 1176.21 5
 -3 4 -7 14945.3 661.287 1
 3 4 -7 15402.9 1223.68 5
 -3 -4 -7 16899.1 1213.62 2
 3 -4 -7 16078 1141.36 2
 -3 4 -7 15908.4 1234.48 5
 3 -4 -7 15205.2 1059.4 5
 3 -4 -5 42799.6 1910.62 7
 3 4 -5 41923.1 1424.62 7
 3 4 -5 42277.4 1752.88 3
 -3 4 -5 44063 1659.57 4
 -3 -4 -5 44431.7 1704.5 1
 -3 -4 -5 43315.6 1712.12 5
 3 -4 -5 40533 1437.6 5
 -3 4 -5 44407.1 1743.47 5
 -3 -4 -5 42716.9 1229.11 8
 3 4 -5 40492.7 1036.49 4
 -3 4 -5 39511.5 1729.71 3
 3 -4 -5 41303.3 1591.61 1
 3 4 -5 42504.8 1782.31 5
 -3 -4 -5 45007.7 1808.96 2
 -3 4 -5 41805 1176.54 1
 3 -4 -5 45026 1837.78 2
 3 4 -5 42843.4 1750.48 6
 -3 -4 -3 7522.03 497.298 8
 -3 4 -3 7276.1 662.39 4
 3 -4 -3 7512.23 366.261 8
 3 4 -3 7684.91 710.266 3
 -3 -4 -3 8350.08 733.135 1
 3 4 -3 7923.96 813.468 6
 3 -4 -3 7113.55 618.546 1
 3 4 -3 7519.44 467.05 7
 3 -4 -3 7358.29 671.561 7
 -3 -4 -3 8311.07 728.312 2
 -3 4 -3 7846.68 597.532 5
 3 4 -3 7806.33 685.911 5
 3 -4 -3 7272.23 812.304 2
 3 -4 -3 7348.65 482.317 5
 -3 4 -3 7573.67 537.407 1
 -3 4 -3 7464.26 624.465 6
 3 -4 -1 45863.7 1445.68 7
 3 4 -1 42579.7 3100.47 6
 -3 4 -1 41661.2 1472.61 6
 3 -4 -1 42233.8 1143.22 8
 -3 4 -1 39652.3 1998.47 7
 3 -4 -1 38654.4 3095.18 6
 -3 -4 -1 41552.8 1727.82 2
 -3 4 -1 44051.8 1370.39 1
 3 -4 -1 43330.8 1441.57 1
 3 4 -1 44191.2 1697.31 3
 -3 4 -1 43234.6 1069.5 5
 -3 -4 -1 46395.6 1712.46 1
 -3 -4 1 46941.1 2957.44 6
 3 -4 1 42574.6 1332.24 1
 3 -4 1 44232.5 1518.66 7
 -3 4 1 43687.6 1541.51 7
 -3 4 1 44310.6 2526.87 6
 3 -4 1 43108.9 1619.96 6
 3 4 1 49231.4 1766.38 1
 -3 -4 1 43210.8 1613.64 1
 3 4 1 42705.3 1825.74 2
 -3 4 1 41984.5 1435.64 1
 -3 -4 1 41418 1612.67 5
 -3 -4 3 9195.38 718.317 1
 -3 4 3 9991.57 788.153 7
 3 -4 3 8575.87 676.716 4
 -3 4 3 8748.67 714.824 1
 3 -4 3 8500.67 641.735 6
 -3 -4 3 8683.45 710.89 5
 -3 -4 3 7671.87 814.906 6
 -3 4 3 8241.59 850.002 2
 3 4 3 8961.47 797.815 4
 3 4 3 8597.55 708.63 2
 -3 4 3 7888.43 479.754 5
 3 4 3 8967.71 512.714 8
 3 -4 3 8520.93 551.642 1
 -3 -4 3 9034.4 767.462 3
 3 -4 3 8935.6 643.236 5
 3 4 3 8663.96 741.383 1
 -3 -4 3 7830.05 525.622 7
 -3 4 3 8626.88 375.445 8
 -3 4 5 45637.2 1941.46 7
 3 4 5 45873.8 1727.71 1
 3 4 5 45098.3 2011.13 4
 -3 4 5 47698.9 1731.17 1
 3 -4 5 42422.2 1679.6 5
 3 4 5 43420.3 1064.37 8
 -3 -4 5 44825.5 1410.76 7
 3 -4 5 45017.8 1628.77 6
 3 -4 5 41554.5 1090.48 1
 -3 -4 5 42063.1 1781.58 5
 -3 -4 5 46483.7 1800.63 3
 -3 4 5 44411.5 1479.02 5
 3 4 5 48343.1 1805.69 2
 -3 -4 5 44678 1779.69 6
 -3 -4 5 45641.6 952.546 4
 3 -4 5 43924.7 1558.65 4
 -3 4 5 47972.7 1869.88 2
 -3 4 7 17232.6 1199.91 2
 -3 -4 7 16435.8 751.142 4
 -3 -4 7 17173.6 1042.82 7
 -3 -4 7 17475.9 1166.34 6
 -3 4 7 16684.9 1072.21 3
 -3 4 7 16076.5 617.883 8
 3 4 7 15718 723.953 8
 3 4 7 15517.1 1304.48 4
 3 4 7 15436.1 1029.28 1
 3 -4 7 14824.9 525.822 1
 3 -4 7 16868.2 1039.37 4
 -3 4 7 15338.5 1048.39 1
 -3 4 7 15426.6 1047.05 5
 -3 -4 9 34845.5 1335.58 4
 3 -4 9 36623.2 1677.09 4
 3 4 9 33276.4 1315.17 3
 -3 -4 9 33477.4 1730.01 6
 3 4 9 35863.9 1219.12 8
 3 4 9 32222.3 1533.01 1
 -3 -4 9 34134.3 1715.3 7
 3 4 9 34833.4 2153.75 4
 -3 4 9 36345.5 1705.72 1
 -3 -4 11 66736 2651.1 6
 -3 4 11 63520.9 2359.26 1
 3 4 11 59688.4 1919.83 3
 3 -4 11 64575 2446.57 4
 3 4 11 63357.8 1826.25 8
 3 4 11 63841.4 3129.3 4
 -3 -4 11 63054.1 2079.67 4
 3 4 11 60071.1 2172.4 1
 3 4 13 15619.5 1006.76 8
 3 4 13 16486.7 1193.98 1
 -3 -4 13 18423.2 1263.04 4
 -3 4 13 16266 1730.15 4
 3 -4 13 19581.6 1459.35 4
 -3 -4 13 17826.9 1487.98 6
 -3 4 13 15955.7 1234.38 1
 3 4 13 20436.5 1912.76 4
 -3 -4 13 16356.5 930.173 1
 -3 4 15 1559.52 464.159 4
 -3 -4 15 1836.58 453.384 4
 3 -4 15 1252.04 372.853 4
 -3 -4 15 1234.33 446.593 6
 -3 4 15 1439.77 397.938 1
 -3 -4 15 753.36 176.691 1
 3 4 15 1107.63 342.201 4
 3 4 15 945.377 285.329 1
 -3 4 17 963.432 376.991 4
 3 4 17 1909.29 673.671 4
 -3 -4 17 1250.7 435.469 6
 3 -4 17 788.629 333.297 4
 -3 -4 17 1665.73 451.504 4
 -3 -4 19 2273.92 674.237 6
 -3 -4 19 906.456 371.225 4
 3 4 19 2047.89 666.726 4
 -3 4 19 2410.51 789.688 4
 3 -4 19 2596.38 668.889 4
 3 4 21 1709.35 683.979 4
 -3 -4 21 2155.42 707.91 6
 -3 4 21 3015.04 823.812 4
 3 -4 21 3152.12 840.69 6
 3 -4 21 2225.67 578.855 4
 3 -4 23 552.346 269.412 4
 3 4 23 771.665 489.484 4
 -3 4 23 -164.191 576.954 4
 3 -4 23 728.078 280.34 6
 -3 -4 23 345.191 346.933 6
 -3 4 25 1883.07 798.423 4
 3 -5 -22 5948.26 1390.17 5
 3 5 -22 5422.16 1064.34 3
 -3 -5 -22 3540.72 1062.26 5
 3 5 -22 5628.26 1330.44 5
 -3 5 -22 5061.04 1300.18 5
 3 5 -20 -264.798 336.67 5
 3 5 -20 409.45 318.855 3
 3 -5 -20 259.652 445.82 5
 -3 -5 -20 -187.085 301.771 5
 -3 5 -20 275.596 453.249 5
 3 5 -18 9408.32 1269.24 3
 3 5 -18 8522.95 1486.5 5
 3 -5 -18 8349.74 1383.16 5
 3 -5 -18 10035.8 1467.74 2
 -3 5 -18 11148 1729.94 5
 -3 -5 -18 7975.74 1406.01 5
 -3 5 -18 10217.7 1162.6 3
 -3 5 -16 5858.27 836.895 3
 3 5 -16 4590.08 1007.44 5
 -3 -5 -16 5504.96 1031.57 2
 3 -5 -16 5725.86 1076.13 5
 3 5 -16 4861.79 846.81 3
 -3 5 -16 5589.64 1152.53 5
 3 -5 -16 4868.68 927.835 2
 -3 -5 -16 5097.12 1071.35 5
 -3 5 -14 6730.98 872.024 3
 -3 -5 -14 5804.73 1039.54 5
 -3 5 -14 6836.05 1177.74 5
 3 5 -14 6303.55 917.032 3
 3 5 -14 6154.44 1075.38 5
 3 -5 -14 7090.73 1039.41 2
 3 -5 -14 6289.32 1001.19 5
 -3 -5 -14 6420.11 1056.06 2
 3 -5 -12 23838.2 1797.9 5
 -3 -5 -12 22584 1436.6 1
 3 5 -12 23962.5 1967.67 5
 -3 -5 -12 21060.7 1796.11 5
 -3 5 -12 25741.5 1592.85 3
 3 -5 -12 22883.3 1749.26 2
 -3 -5 -12 24772.6 1906.85 2
 3 5 -12 24000.8 1716.7 3
 -3 5 -12 26242.3 2095.82 5
 -3 5 -10 9836.64 933.315 3
 -3 -5 -10 9934.1 937.267 1
 -3 -5 -10 8667.04 1022.67 5
 -3 -5 -10 9182.91 1075.61 2
 3 5 -10 10216.8 1189.06 5
 3 5 -10 10323.4 1075.34 3
 3 5 -10 9881.78 903.443 4
 3 -5 -10 9525.36 1010.32 5
 3 -5 -10 8890.26 1004.94 2
 -3 5 -10 9559.91 1142.6 5
 -3 5 -8 6902.23 813.824 4
 3 -5 -8 6978.53 751.398 5
 3 -5 -8 7484.14 768.067 1
 -3 -5 -8 7551.89 902.764 2
 3 -5 -8 7740.18 874.436 2
 -3 5 -8 6238.49 759.903 3
 3 5 -8 7256.15 647.842 4
 -3 -5 -8 7210.32 838.29 5
 -3 5 -8 7775.25 915.327 5
 -3 -5 -8 7017.76 758.041 1
 3 5 -8 7113.86 835.595 3
 -3 5 -8 6110.78 494.524 1
 3 5 -8 7700.93 931.893 5
 -3 -5 -6 47449.4 2075.65 2
 -3 -5 -6 43891.8 1840.62 1
 -3 5 -6 41453.2 1368.12 1
 3 -5 -6 43521 1610.25 5
 -3 5 -6 39121.4 1925.21 3
 3 -5 -6 46202.1 1852.19 1
 -3 5 -6 44504.4 1820.47 4
 3 5 -6 45100.1 1997.92 5
 -3 5 -6 45271.7 1919.32 5
 -3 -5 -6 44043.5 1835.18 5
 3 -5 -6 45013.6 2137.71 7
 -3 -5 -6 42591.9 1288.69 8
 3 5 -6 43582.4 1245.81 4
 3 -5 -6 45832.4 2072.86 2
 3 5 -6 44951.4 2023.58 3
 -3 -5 -4 57814 2112.86 1
 3 -5 -4 58596.5 1992.08 1
 3 5 -4 58727.5 2252.67 3
 3 -5 -4 55603.1 2390.37 2
 3 5 -4 55484.7 2328.47 6
 3 -5 -4 60415.6 2155.64 7
 3 5 -4 57724.9 1351.07 7
 3 5 -4 58686 2041.75 5
 -3 -5 -4 59709.7 2218.19 2
 -3 5 -4 55659.2 1643.94 1
 -3 5 -4 60301.3 1870.65 5
 3 -5 -4 60330.1 1500.49 5
 3 5 -4 57881.8 1132.32 4
 -3 -5 -4 55667.7 1416.58 8
 -3 5 -4 59179.6 2037.75 4
 3 5 -2 10902.7 682.288 7
 -3 5 -2 10685.2 828.188 6
 -3 -5 -2 10547.8 726.881 8
 -3 -5 -2 10988.1 917.292 1
 3 5 -2 10812 1344.54 6
 3 -5 -2 11365.2 833.998 1
 3 -5 -2 10242.7 1349.08 2
 3 -5 -2 11524.2 801.038 7
 3 -5 -2 11187.6 567.327 8
 -3 5 -2 12755 807.698 1
 -3 5 -2 10606.7 612.328 5
 -3 -5 -2 9983.99 940.906 2
 3 5 -2 11274.4 975.447 3
 -3 5 0 10355.3 1085.62 6
 3 -5 0 9694.28 722.104 1
 3 -5 0 10179 668.944 7
 -3 -5 0 10685.1 1186.74 2
 -3 -5 0 15260.6 2170.42 6
 3 5 0 13094.7 2172.87 6
 3 -5 0 11607.9 1387.38 6
 -3 5 0 11128.8 921.017 7
 -3 5 0 10643.6 778.498 1
 -3 5 0 9755.92 404.757 5
 -3 -5 0 10223.6 869.727 1
 3 5 0 11324.5 925.223 1
 3 5 2 11713.5 920.824 1
 3 5 2 11502.3 1000.55 2
 -3 5 2 10421.5 409.047 5
 -3 5 2 9044.52 1216.61 6
 3 -5 2 12029.3 760.71 1
 -3 -5 2 11417 813.12 5
 3 -5 2 11179.3 781.628 7
 -3 5 2 11943.1 874.613 1
 3 -5 2 12555.9 940.286 6
 -3 -5 2 11053.8 1307.18 6
 -3 -5 2 11141.3 879.905 1
 -3 5 2 12475.6 870.222 7
 -3 -5 4 59018 2411.36 6
 -3 -5 4 60375.5 1433.42 7
 3 5 4 64601.9 2167.44 2
 -3 -5 4 60309.6 2004.24 1
 3 -5 4 58897.2 1829.5 5
 3 -5 4 56652.2 1859.63 4
 3 -5 4 62511.4 1993.46 6
 -3 -5 4 64792.8 2299.49 3
 -3 5 4 60960.9 2072.06 1
 3 -5 4 60988.1 1594.36 1
 -3 5 4 65661.8 2261.02 7
 -3 -5 4 56524.5 1984.17 5
 -3 5 4 59929.9 1452.65 5
 3 5 4 61332 1413.9 8
 3 5 4 61828.6 2166.83 1
 3 5 6 39457.6 1753.99 1
 3 5 6 40180.5 1046.64 8
 -3 -5 6 42883.4 1456.09 7
 3 5 6 41984.8 2199.71 4
 3 -5 6 40396.9 1782.02 5
 -3 -5 6 38994.9 1042.53 4
 -3 5 6 45327.6 2016.76 2
 3 -5 6 38510.7 1563.7 4
 -3 -5 6 39565.9 1879.76 5
 -3 5 6 40127.7 1787.75 1
 -3 5 6 42632.1 1555.27 5
 -3 -5 6 39817.2 1610.77 1
 3 -5 6 41181.4 1731.1 6
 3 -5 6 39833.9 1179.03 1
 -3 -5 6 42068.1 1906.98 6
 3 -5 8 6305.01 737.118 6
 -3 -5 8 6371.41 504.434 4
 -3 -5 8 6766.83 685.184 7
 -3 -5 8 6134.56 615.681 1
 -3 5 8 6095.38 726.941 1
 3 -5 8 5193.36 368.899 1
 -3 -5 8 6376.41 758.886 6
 3 5 8 7707.69 809.509 1
 -3 5 8 5769.01 696.15 5
 3 5 8 5971.84 443.628 8
 -3 5 8 5356.37 288.072 8
 3 -5 8 6191.29 664.002 4
 3 5 8 6060.57 923.527 4
 3 5 10 9321.14 617.047 8
 3 5 10 9124.97 1198.34 4
 3 5 10 9717.21 781.834 3
 3 -5 10 9939.03 922.025 4
 -3 -5 10 9748.19 1012.98 6
 -3 -5 10 9506.09 727.147 4
 -3 -5 10 10615.8 810.656 1
 3 -5 10 10636.5 1062.3 6
 3 5 10 9421.2 913.711 1
 -3 5 10 9260.15 939.159 1
 -3 5 12 23642.7 1553.77 1
 -3 -5 12 21523 1609.93 6
 -3 -5 12 23124.7 1197.84 1
 3 5 12 22034.4 1049.38 8
 -3 -5 12 23112 1291.15 4
 3 -5 12 25812.5 1615.28 4
 -3 5 12 22623.8 2086.39 4
 3 5 12 22218.2 1991.95 4
 3 5 12 22453.9 1460.33 1
 3 -5 12 22695.8 1658.78 6
 -3 -5 14 6512.03 946.413 6
 -3 5 14 6208.47 821.083 1
 3 5 14 5973.6 770.354 1
 -3 5 14 5931.8 1121.89 4
 3 5 14 6478.42 1143.83 4
 3 -5 14 7323.12 1018.8 6
 3 -5 14 6900.96 921.222 4
 -3 -5 14 6300.51 752.456 4
 3 -5 16 4427.58 825.108 6
 -3 5 16 4812.83 1009.37 4
 -3 5 16 3381.28 638.49 1
 -3 -5 16 5958.46 821.471 4
 -3 -5 16 4086.03 832.34 6
 3 5 16 3283.52 585.436 1
 3 -5 16 5435.76 837.538 4
 3 5 16 4993.23 1068.51 4
 -3 5 18 8625.42 1490.63 4
 3 -5 18 10179.8 1401.37 6
 3 5 18 9510.66 1541.89 4
 3 -5 18 10283.5 1263.04 4
 -3 -5 18 7060.86 924.256 4
 -3 -5 18 9521.82 1323.16 6
 3 5 20 45.3166 357.49 4
 3 -5 20 281.062 496.957 6
 -3 5 20 -153.309 432.874 4
 -3 -5 20 693.795 471.972 6
 3 -5 20 153.881 256.911 4
 3 -5 22 6986.74 1317.55 6
 -3 5 22 5024.11 1208.75 4
 -3 -5 22 6193.38 1196.82 6
 3 -5 22 5605.38 1046.38 4
 3 5 22 4614.94 1148.7 4
 3 5 24 185.835 377.111 4
 -3 5 24 -76.4522 616.481 4
 3 -6 -23 2144.56 820.765 5
 -3 -6 -23 2397.85 955.827 5
 3 6 -21 3713.09 1127.02 5
 -3 6 -21 5580.84 1439.88 5
 -3 -6 -21 4137.73 1152.71 5
 3 -6 -21 4324.64 1151.32 5
 3 6 -21 5488.54 1089.5 3
 3 6 -19 569.413 402.854 3
 -3 6 -19 700.612 372.055 3
 3 6 -19 326.733 303.537 5
 3 -6 -19 353.386 424.014 2
 3 -6 -19 24.9946 290.821 5
 -3 -6 -19 1354.99 656.344 2
 -3 6 -19 491.07 541.636 5
 -3 -6 -19 666.164 558.72 5
 -3 -6 -17 624.379 430.736 5
 3 6 -17 648.439 275.602 5
 3 6 -17 138.937 188.922 3
 -3 6 -17 625.901 287.431 3
 3 -6 -17 191.082 258.497 5
 -3 6 -17 795.543 588.081 5
 -3 -6 -17 1263.93 603.302 2
 3 -6 -17 822.423 503.438 2
 3 6 -15 9807.17 1239.59 3
 -3 6 -15 10979.3 1196.35 3
 -3 -6 -15 10482.8 1452.9 2
 -3 6 -15 12401.2 1658.51 5
 3 -6 -15 9788.83 1331.78 5
 3 6 -15 8767.3 1410.04 5
 3 -6 -15 10881 1384.11 2
 -3 -6 -15 10008.1 1406.83 5
 -3 -6 -13 8235.59 1182.73 2
 3 -6 -13 5769.18 929.461 5
 3 -6 -13 6958.2 1049.94 2
 3 6 -13 7475.52 1188.27 5
 3 6 -13 7092.45 1020.29 3
 -3 6 -13 9229.65 1313.83 5
 -3 -6 -13 8194.68 1173.34 5
 -3 6 -13 7319.78 928.309 3
 -3 6 -11 2415.49 512.005 3
 3 -6 -11 2778.49 607.81 2
 -3 -6 -11 2750.11 641.005 5
 -3 6 -11 2760.05 679.971 5
 3 -6 -11 3323.01 631.413 5
 3 6 -11 3457.75 746.789 5
 -3 -6 -11 3179.86 688.253 2
 3 6 -11 2455.86 474.388 4
 3 6 -11 2950.2 607.997 3
 -3 -6 -9 6771.74 950.968 2
 -3 -6 -9 6371.22 855.299 5
 3 6 -9 5877.01 830.998 3
 -3 6 -9 6311.47 817.807 3
 3 6 -9 7420.09 970.448 5
 3 6 -9 6144.43 646.567 4
 3 -6 -9 6060.16 739.978 5
 -3 6 -9 7071.75 942.031 5
 3 -6 -9 6455.69 880.369 2
 -3 -6 -7 31919.3 1128.38 8
 -3 -6 -7 35616 1763.96 5
 -3 -6 -7 36536.2 2018.18 2
 -3 6 -7 33341 1931.64 3
 3 6 -7 34620.2 1274.56 4
 3 6 -7 38395.4 1998.07 5
 3 -6 -7 33820.9 1976.97 2
 -3 6 -7 38193.4 1918.38 5
 -3 -6 -7 36295 1845.87 1
 -3 6 -7 36081.4 1801.49 4
 3 -6 -7 31163 1465.25 5
 -3 6 -7 33204.8 1395.73 1
 3 -6 -7 35337.2 2056.73 7
 3 6 -7 35831.8 1960.69 3
 -3 6 -5 31005.4 1486.14 5
 -3 6 -5 30349.5 1340.37 1
 3 -6 -5 31283.5 1602.19 1
 3 6 -5 32038 1811.44 3
 -3 -6 -5 30803 1448.03 5
 3 -6 -5 33503.6 1772.5 7
 3 -6 -5 28795.9 1895.49 2
 -3 -6 -5 30720.1 1672.58 1
 3 -6 -5 31671.6 1193.05 5
 3 6 -5 31781.5 1628.15 5
 -3 6 -5 30736.1 1583.05 4
 -3 -6 -5 30491.5 1775.95 2
 3 6 -5 31106.3 992.264 4
 -3 -6 -5 30195.2 1085.85 8
 -3 -6 -3 1861.97 410.484 1
 3 -6 -3 1717.51 600.303 2
 3 6 -3 1551.56 565.944 6
 -3 6 -3 1921.78 420.526 4
 -3 -6 -3 1366.87 278.696 8
 -3 6 -3 1755.52 392.42 6
 -3 6 -3 1613.37 277.639 5
 -3 6 -3 2019.59 354.596 1
 3 6 -3 1486.63 338.333 5
 3 -6 -3 1417.41 325.7 7
 3 -6 -3 1602.44 211.247 8
 3 -6 -3 1547.18 340.454 1
 3 6 -3 1880.11 434.58 3
 -3 -6 -3 1630.79 419.645 2
 3 -6 -3 1649.7 218.065 5
 -3 6 -1 36789.1 2176 7
 3 -6 -1 38588.8 3694.49 6
 3 -6 -1 36367 1368.3 7
 3 -6 -1 34719.2 1530.97 1
 3 6 -1 34249.1 3346.49 6
 -3 6 -1 33689.2 921.125 5
 -3 6 -1 34273.5 1505.45 1
 -3 6 -1 35682.3 1927.57 6
 -3 -6 -1 35597.2 1745.96 1
 3 6 -1 36514.4 1775.19 1
 -3 -6 -1 36164.3 2222.07 2
 -3 6 1 38455.6 1558.14 7
 -3 -6 1 33629.9 1421.08 5
 -3 -6 1 36482.7 1745.34 1
 3 -6 1 36318.2 1492.22 1
 3 -6 1 39964.9 2306.35 6
 3 6 1 42126.6 2626.1 2
 -3 6 1 40062.8 2877.9 6
 3 -6 1 34792.5 1211.46 7
 -3 6 1 36551.3 1599.36 1
 3 6 1 35400.9 1746.59 1
 -3 -6 1 39994.8 3273.11 6
 3 6 1 44490.7 3555.69 6
 3 -6 3 2380.07 448.218 6
 -3 6 3 2022.54 205.876 5
 3 -6 3 2273.75 351.563 1
 3 -6 3 2146.56 339.381 5
 -3 -6 3 2045.45 403.039 1
 3 -6 3 2425.84 365 7
 -3 -6 3 2374.55 400.251 5
 3 6 3 2733.92 516.714 1
 -3 6 3 2175.75 433.053 1
 -3 -6 3 1832.85 540.94 6
 3 6 3 2292.48 480.279 2
 -3 6 3 2943.94 473.971 7
 -3 6 3 2321.44 594.819 2
 -3 -6 5 33973 1610.5 1
 3 -6 5 30789.3 1239.26 1
 3 -6 5 35172.5 1659.08 6
 -3 6 5 34680.9 1806.34 7
 -3 -6 5 34473.1 1961.1 6
 -3 6 5 35351.9 1999.65 2
 3 6 5 32459.2 1700.01 1
 -3 -6 5 31623.7 1600.77 5
 3 -6 5 33351.5 1518.13 5
 -3 -6 5 32790.7 1100.77 7
 -3 6 5 34609.4 1720.37 1
 -3 6 5 33157.7 1192.01 5
 -3 -6 7 41199.9 1223.14 4
 -3 -6 7 40235.5 1728.4 1
 -3 6 7 39461.5 1602.58 5
 3 6 7 38283.8 1879.48 1
 -3 -6 7 40740.9 2051.02 6
 -3 6 7 39552.9 1913.76 1
 3 6 7 42071.3 1092.98 8
 3 -6 7 40709 1715.36 4
 3 -6 7 39343.3 1280.14 1
 3 -6 7 41252.4 1904.37 6
 -3 -6 7 40706.5 1496.84 7
 3 6 7 41311.9 2350.31 4
 3 -6 9 6550.71 830.724 6
 -3 -6 9 6356.59 683.809 1
 3 -6 9 6454.71 720.102 4
 -3 -6 9 6905.97 569.509 4
 3 6 9 6383.75 450.955 8
 -3 -6 9 7796.25 913.503 6
 3 -6 9 5859.36 434.827 1
 -3 -6 9 5936.64 671.77 7
 3 6 9 7018.2 1052.5 4
 -3 6 9 6292.91 811.919 1
 3 6 9 6616.05 815.006 1
 -3 6 11 2725.75 239.478 8
 3 6 11 2711.25 742.422 4
 3 -6 11 3113.44 532.072 4
 -3 6 11 3277.89 608.633 1
 3 6 11 2337.38 489.347 1
 -3 -6 11 2778.06 415.526 4
 -3 -6 11 3311.17 611.837 6
 -3 -6 11 3271.2 486.278 1
 3 6 11 3295.26 359.131 8
 3 -6 11 2698.69 615.98 6
 -3 6 11 2368.68 216.348 8
 -3 -6 13 7111.19 745.133 4
 3 -6 13 7556.37 1048.01 6
 -3 -6 13 7013.26 1009.94 6
 -3 6 13 6490.83 1227.36 4
 3 -6 13 7074.28 878.873 4
 3 6 13 6383.84 545.295 8
 3 6 13 6582.4 1181.11 4
 3 6 13 6385.83 884.142 1
 -3 -6 13 5995.6 627.431 1
 -3 6 13 5872.48 437.078 8
 -3 6 13 6721.76 906.113 1
 3 -6 15 10793.7 1150.65 4
 -3 6 15 8591.11 1462.05 4
 3 -6 15 10494.1 1323.81 6
 -3 6 15 11170.2 1191.86 1
 3 6 15 9076.96 1029.97 1
 3 6 15 10731.3 1576.77 4
 -3 -6 15 11987.9 1375.95 6
 -3 -6 15 11352.3 1036.99 4
 -3 6 17 663.389 277.176 4
 -3 -6 17 392.842 211.086 4
 3 -6 17 882.993 475.993 6
 -3 6 17 606.718 315.797 1
 3 6 17 1275 646.112 4
 -3 -6 17 -67.9324 244.193 6
 3 -6 17 604.474 286.224 4
 3 -6 19 477.292 314.979 4
 3 -6 19 460.226 438.399 6
 -3 -6 19 689.604 384.515 6
 3 6 19 501.187 462.717 4
 -3 6 19 50.2059 231.379 4
 -3 6 21 4872.47 1245.53 4
 3 6 21 5086.11 1230.18 4
 3 -6 21 5217.64 1128.13 6
 -3 -6 21 5260.97 1084.68 6
 3 -6 21 5633.03 996.329 4
 -3 -6 23 2064.3 767.929 6
 3 6 23 2958.04 1045.81 4
 -3 6 23 3617.27 1110.94 4
 3 -7 -24 927.852 513.049 5
 3 7 -22 194.053 351.449 3
 3 7 -22 1051.4 705.867 5
 3 -7 -22 95.9141 211.102 5
 -3 7 -22 262.015 391.725 5
 -3 -7 -22 599.023 324.671 5
 -3 -7 -20 2283.37 938.066 5
 3 -7 -20 2138.03 744.889 2
 3 7 -20 3026.55 781.768 3
 -3 7 -20 1532.31 671.747 5
 -3 -7 -20 2729.58 886.514 2
 3 -7 -20 2064.88 761.287 5
 3 7 -20 4012.64 1117.05 5
 3 7 -18 1462.7 576.017 5
 -3 7 -18 2277.53 601.91 3
 3 7 -18 1714.8 610.722 3
 3 -7 -18 2388.04 780.373 5
 -3 7 -18 1794.33 696.811 5
 -3 -7 -18 1298.07 632.978 5
 -3 -7 -18 2278.13 786.84 2
 3 -7 -18 1910.97 671.716 2
 3 -7 -16 11605.1 1513.35 5
 -3 -7 -16 9613.36 1438.31 5
 -3 7 -16 10318 1588.33 5
 -3 -7 -16 11593.6 1583.79 2
 3 -7 -16 11295.8 1543 2
 -3 7 -16 11492.6 1299.71 3
 3 7 -16 10657.2 1373.2 3
 3 7 -16 11541.1 1665.18 5
 -3 7 -14 42676.9 2417.3 3
 -3 -7 -14 40523.6 2803.33 2
 3 -7 -14 42818.7 2627.61 5
 -3 -7 -14 45326.3 2826.1 5
 3 7 -14 44139.6 2676.09 3
 3 -7 -14 40446.5 2666.09 2
 3 7 -14 49405.3 3169.71 5
 -3 7 -14 45307.4 3041.43 5
 -3 -7 -12 4090.97 775.251 5
 -3 7 -12 5158.19 950.569 5
 3 -7 -12 4133.99 718.724 5
 3 7 -12 3708 622.613 4
 -3 -7 -12 4509.09 866.524 2
 3 7 -12 5592.73 945.016 3
 3 -7 -12 4045.62 787.357 2
 3 7 -12 5147.86 973.016 5
 -3 7 -12 4888.89 797.75 3
 -3 -7 -10 9507.31 1183.19 2
 -3 7 -10 9569.43 1089.83 3
 3 -7 -10 8604.55 941.555 5
 -3 7 -10 10150.7 1184.82 5
 3 -7 -10 8638.81 1105.63 2
 3 7 -10 9915.36 1183.61 3
 3 7 -10 10211.3 1210.08 5
 3 7 -10 9339.9 847.445 4
 -3 -7 -10 8336.86 1013.56 5
 -3 7 -8 19513.9 1175.03 1
 -3 7 -8 20739.6 1509.66 5
 3 7 -8 18975.7 1050.83 4
 -3 7 -8 17573.8 1501 3
 3 7 -8 20395.7 1620.98 3
 -3 -7 -8 19874.1 1629.87 2
 3 -7 -8 18282.4 1199.23 5
 3 -7 -8 20486.8 1665.68 2
 -3 -7 -8 18392.1 832.263 8
 -3 -7 -8 19544.8 1369.38 5
 3 7 -8 22736.7 1636.5 5
 -3 -7 -6 6569.37 707.323 5
 -3 7 -6 6561.77 939.158 3
 -3 -7 -6 6751.31 514.927 8
 -3 7 -6 7412.29 826.285 4
 3 7 -6 8053.69 901.853 5
 3 7 -6 7442.55 975.734 3
 -3 7 -6 6888.19 770.413 5
 3 -7 -6 6209.03 963.029 2
 3 -7 -6 6707.38 590.365 5
 -3 -7 -6 7634.73 987.811 2
 3 -7 -6 6562.93 841.126 7
 3 7 -6 6749.66 527.595 4
 -3 7 -6 6495.11 683.639 1
 3 -7 -4 17829 760.031 5
 -3 7 -4 18013.7 1141.84 1
 3 7 -4 24574.3 1427.75 5
 -3 7 -4 18856.5 1070.42 5
 3 -7 -4 19929.7 1322.07 7
 3 -7 -4 16197.9 641.368 8
 3 7 -4 20901.1 1585.79 3
 -3 -7 -4 15364.1 1398.11 2
 -3 7 -4 17944 1387.45 4
 3 7 -4 17693.5 1001.62 4
 -3 -7 -4 16987.5 951.9 8
 3 -7 -4 15282.4 1619.7 2
 -3 -7 -2 45586.5 2100.58 1
 3 -7 -2 46396.7 1717.29 7
 3 -7 -2 46955.8 1958.95 1
 -3 -7 -2 44549 2546.23 2
 -3 7 -2 49360.7 1926.8 1
 3 7 -2 46099.2 2191.07 1
 3 -7 -2 51678.8 3684.11 2
 -3 7 -2 45169.8 2222.76 6
 -3 7 -2 45818.1 1299.55 5
 3 7 -2 46467.6 3534.17 6
 3 7 -2 49578.6 2437.53 3
 -3 -7 0 16543.1 1261.56 1
 3 -7 0 17364.3 900.327 7
 3 -7 0 15814.3 1084.66 1
 -3 7 0 16275.2 1702.48 6
 -3 -7 0 24593.8 3136.13 6
 3 7 0 22580.9 3107.72 6
 -3 7 0 15527.4 1127.7 1
 3 -7 0 19897.8 2338 6
 -3 7 0 16711.9 1210.02 7
 -3 -7 0 20867.9 1984.37 2
 3 7 0 16881.8 1288.37 1
 -3 7 2 49016 1883.33 7
 3 -7 2 47045.8 1410.87 7
 3 7 2 45715.5 2112.62 1
 3 -7 2 45799 2445.56 6
 -3 -7 2 48216.5 3352.46 6
 -3 7 2 43374.1 3338.25 6
 -3 -7 2 43561.1 1658.95 5
 -3 7 2 47162.9 1995.25 1
 -3 -7 2 44652.4 2031.59 1
 3 -7 2 43214.2 1306.84 5
 3 -7 2 43252.3 1714.48 1
 3 7 2 41945.3 3153.43 6
 3 7 2 50293.5 2758.71 2
 -3 7 4 18701.8 719.54 5
 3 -7 4 19032.7 1102.44 1
 -3 7 4 20671 1373.44 7
 3 -7 4 22725.4 1481.07 6
 3 -7 4 18384.6 1052.1 5
 -3 -7 4 24001.8 1995.35 6
 -3 -7 4 22006.6 1331.44 5
 -3 -7 4 22160.6 1418.37 1
 3 7 4 20764.5 1441.37 1
 -3 7 4 21229.3 1400.41 1
 -3 7 6 6660.9 799.307 1
 3 7 6 6423.78 829.075 1
 -3 -7 6 7388.34 975.524 6
 -3 7 6 6073.97 553.259 5
 3 -7 6 6632.02 800.108 6
 3 -7 6 5808.98 575.931 1
 3 -7 6 6245.45 717.604 5
 -3 -7 6 6354.49 741.798 1
 -3 -7 6 6392.85 518.204 7
 3 -7 8 19678.9 1267.72 4
 3 -7 8 18833.3 958.016 1
 3 7 8 20394.6 777.772 8
 -3 -7 8 19888.6 1300.26 1
 -3 7 8 19200.1 1193.82 5
 -3 -7 8 21259.2 1601.08 6
 -3 -7 8 20038.2 953.196 4
 3 7 8 21293.7 1847.27 4
 -3 7 8 21309.3 1504.11 1
 3 -7 8 20520.2 1480.29 6
 -3 -7 8 20678 1117.15 7
 3 7 8 20003.5 1477.85 1
 3 -7 10 8071.45 861.85 4
 -3 -7 10 8596.31 843.653 7
 3 -7 10 6978.04 542.013 1
 3 7 10 8411.17 1264.35 4
 3 -7 10 7982.55 981.781 6
 3 7 10 8429.18 972.437 1
 -3 -7 10 8322.58 672.423 4
 -3 -7 10 9271.55 1099.09 6
 -3 7 10 8860.65 1034.31 1
 -3 -7 10 7648.84 789.716 1
 3 7 10 7580.42 484.424 8
 -3 -7 12 4499.16 583.028 1
 3 -7 12 4810.08 803.103 6
 -3 -7 12 5561.97 877.669 6
 3 7 12 4868.76 745.195 1
 3 7 12 4839.88 414.047 8
 3 -7 12 4935.08 692.172 4
 -3 -7 12 4552.48 550.653 4
 3 7 12 4213.95 985.512 4
 -3 7 12 3897.86 676.184 1
 -3 -7 14 51305.8 2804.58 6
 3 7 14 39161.3 2239.4 1
 3 -7 14 43887.2 2276.3 4
 3 -7 14 44680.6 2623.65 6
 -3 7 14 41233.6 2356.7 1
 -3 7 14 41676.7 3208.28 4
 3 7 14 41687.8 3076.7 4
 -3 -7 14 46716.3 1970.69 4
 -3 -7 16 10697.2 1379.62 6
 3 -7 16 11670.3 1425.74 6
 -3 7 16 10013.9 1200.48 1
 3 7 16 7733.19 1013.81 1
 -3 7 16 9840.83 1615.14 4
 -3 -7 16 7194.82 849.616 4
 3 -7 16 10767.2 1200.25 4
 3 7 16 8684.68 1479.03 4
 3 -7 18 1872.89 528.818 4
 3 7 18 2773.63 927.965 4
 -3 -7 18 2211.46 649.629 6
 -3 7 18 1423.37 481.127 4
 3 -7 18 1982 630.6 6
 3 7 20 2245.94 844.875 4
 3 -7 20 1646.66 599.516 6
 3 -7 20 2598.22 678.571 4
 -3 -7 20 2003.66 698.141 6
 -3 7 20 2445.62 863.475 4
 -3 7 22 645.192 527.929 4
 3 -7 22 426.149 421.644 6
 -3 -7 22 196.384 339.026 6
 3 7 22 221.998 595.078 4
 -3 7 24 1608.49 802.74 4
 3 -8 -23 733.251 453.99 5
 -3 -8 -23 847.137 557.72 5
 3 8 -21 5974.15 1191.68 3
 3 8 -21 5108.93 1401.86 5
 -3 8 -21 5793.31 1562.12 5
 -3 -8 -21 5363 1303.69 2
 -3 -8 -21 4455.23 1141.59 5
 3 -8 -21 5062.6 1274.6 5
 3 -8 -21 5889.75 1322.66 2
 -3 8 -19 504.144 211.124 3
 3 8 -19 507.605 218.276 3
 -3 -8 -19 701.835 507.585 2
 3 -8 -19 926.802 421.654 2
 3 8 -19 1227.87 895.597 5
 -3 -8 -19 884.999 506.946 5
 -3 8 -19 768.964 604.066 5
 3 -8 -19 1330.72 630.391 5
 -3 -8 -17 5118.49 1135.4 2
 -3 8 -17 3396.14 736.191 3
 3 -8 -17 4014.34 952.577 2
 -3 8 -17 2495.26 764.964 5
 -3 -8 -17 3419.22 922.009 5
 3 8 -17 3717.56 877.259 3
 3 -8 -17 3516.98 882.514 5
 3 8 -17 3210.67 1064.71 5
 3 -8 -15 7568.16 1252.81 2
 -3 8 -15 7614.64 1144.83 3
 3 8 -15 8833.71 1415.54 5
 -3 -8 -15 7642.71 1328.76 2
 3 -8 -15 10001.4 1383.7 5
 -3 -8 -15 7058.69 1189.42 5
 -3 8 -15 7456.99 1304.26 5
 3 8 -15 7404.95 1175.69 3
 3 -8 -13 16914.7 1563.25 5
 3 8 -13 13034.3 1491.57 3
 3 -8 -13 11510.8 1471.86 2
 3 8 -13 12997.9 1576.06 5
 -3 8 -13 12057.5 1343.48 3
 -3 8 -13 14570.8 1655.79 5
 -3 -8 -13 13175.7 1479.7 5
 -3 -8 -13 13181.8 1615.4 2
 -3 8 -11 15904.2 1512.49 3
 3 8 -11 14979.7 1158.25 4
 -3 -8 -11 15139.1 1638.42 2
 3 8 -11 15905.1 1609.1 3
 3 8 -11 15551.6 1578.87 5
 3 -8 -11 16139.9 1374.65 5
 -3 8 -11 15361.5 1543.99 5
 -3 -8 -11 15238 1417.19 5
 3 -8 -11 16311 1681.01 2
 -3 8 -9 88595.3 2758.71 1
 3 8 -9 101905 3700.27 5
 3 8 -9 95119.5 3739.62 3
 -3 8 -9 86313 3595.63 3
 3 -8 -9 95337.5 3919.06 2
 -3 -8 -9 88851.8 3085.87 5
 3 -8 -9 102585 3048.55 5
 -3 8 -9 97426.1 3524.05 5
 -3 -8 -9 97160.2 3899.54 2
 3 8 -9 87655.5 2479.18 4
 3 8 -7 25393 1691.64 5
 3 8 -7 19845.7 1032.3 4
 -3 -8 -7 19997.8 894.136 8
 -3 -8 -7 20876.8 1336.6 5
 3 -8 -7 21588.2 1181.62 5
 3 8 -7 19070.9 1640.71 3
 -3 8 -7 21353.6 1454.6 5
 -3 8 -7 20712.1 1820.95 3
 -3 8 -7 19326.6 1296.4 1
 3 -8 -7 19582.9 1843.6 2
 -3 -8 -7 21494.6 1780.8 2
 -3 8 -5 34100.5 1985.74 4
 -3 -8 -5 33299.2 2203.18 2
 -3 8 -5 34439.9 1732.52 1
 3 -8 -5 34453 868.445 8
 3 8 -5 35099.1 1399.55 4
 3 8 -5 35556.5 1825.03 5
 3 8 -5 36414.5 2221.65 3
 -3 8 -5 34992.7 1622.96 5
 3 -8 -5 39603.7 2010.38 7
 -3 -8 -5 35232.1 1533.38 5
 -3 -8 -5 31763.4 1312.57 8
 3 -8 -5 30322.5 2423.33 2
 3 -8 -5 35579.7 1205.63 5
 -3 8 -3 3003.13 520.959 1
 3 8 -3 3495.78 675.943 3
 -3 -8 -3 2744.5 660.399 2
 -3 8 -3 3500.81 423.958 5
 3 -8 -3 3468.05 384.784 8
 3 -8 -3 3486.86 938.841 2
 3 -8 -3 3903.38 545.252 7
 3 8 -3 4093.59 682.1 1
 -3 -8 -3 3083.49 474.989 8
 3 -8 -1 13938.6 2434.47 6
 3 8 -1 12009.5 1141.46 1
 3 -8 -1 11063.6 801.772 7
 -3 8 -1 12493.5 1420.32 6
 -3 -8 -1 14622.3 1674.32 2
 -3 8 -1 13130.6 1405.33 7
 -3 8 -1 11313.7 550.314 5
 3 -8 -1 15693.7 2231.1 2
 -3 8 -1 11714.3 1083.01 1
 -3 8 1 12243.6 1826.82 6
 3 -8 1 10096.7 922.466 1
 3 -8 1 12954.3 1725.81 6
 -3 8 1 12100.9 1082.38 1
 -3 8 1 12158.8 988.038 7
 -3 -8 1 11559.5 1998.43 6
 3 8 1 12846.1 1183.77 1
 3 -8 1 10933.7 676.053 7
 -3 -8 1 10534.9 794.516 5
 -3 -8 3 4048.92 637.378 1
 -3 8 3 4081.65 696.185 1
 -3 8 3 4507.48 1063.54 6
 -3 -8 3 3817.03 529.206 5
 3 -8 3 4264.73 420.005 7
 -3 -8 3 4226.15 950.77 6
 3 -8 3 4181.76 830.183 6
 3 8 3 4574.52 711.098 1
 -3 8 3 4270.92 598.424 7
 3 -8 3 3995.83 455.856 5
 3 -8 3 3946.98 545.839 1
 -3 -8 5 36152.4 1868.01 1
 -3 -8 5 35780.5 2401.11 6
 3 -8 5 34158.4 1553.92 1
 -3 8 5 43348.2 2155.21 1
 3 -8 5 41080 2149.3 6
 -3 8 5 37145.2 1167.74 5
 3 -8 5 34411.8 1594.38 5
 -3 -8 5 34793.7 1744.14 5
 3 8 5 35922.4 2003.22 1
 -3 -8 5 31421.9 909.276 7
 -3 -8 7 20899.9 961.547 7
 3 8 7 19789.8 1516.63 1
 -3 -8 7 23589.4 1848.22 6
 3 -8 7 19453.3 1119.29 1
 -3 8 7 23791.2 1716.27 1
 -3 -8 7 20933.6 1420.16 1
 -3 8 7 23941.4 1204.82 5
 3 -8 7 21465.3 1581.48 6
 -3 -8 9 93536.8 2461.21 7
 -3 8 9 113697 3722.77 1
 3 -8 9 97807.1 3424.56 6
 -3 -8 9 97318.8 3673.31 6
 -3 -8 9 87580.3 2865.88 1
 3 -8 9 85199.9 2199.18 1
 3 8 9 90484.3 3334.49 1
 3 8 9 100100 4236.94 4
 -3 8 9 101327 2910.28 5
 3 -8 9 95181.9 2936.55 4
 3 8 11 14212.8 1364.38 1
 -3 -8 11 15444.2 1157.48 7
 3 -8 11 15256.3 1441.61 6
 -3 -8 11 17667.7 1599.06 6
 -3 8 11 19858.4 1627.22 1
 3 -8 11 16754 1297.85 4
 3 -8 11 15063.5 818.253 1
 -3 -8 11 15634.4 1177.28 1
 -3 -8 11 15829.4 997.637 4
 3 8 11 14416 638.107 8
 3 8 11 15004.2 1722.9 4
 3 -8 13 13301.4 1445.23 6
 3 -8 13 12711.4 1188.48 4
 -3 -8 13 14167.3 1485.01 6
 -3 8 13 16238.3 1519.98 1
 -3 -8 13 13250.9 989.629 4
 3 8 13 12288.9 1720.3 4
 3 8 13 12837.2 1325.44 1
 -3 8 15 8168.33 1120.63 1
 -3 -8 15 4932.23 666.428 4
 -3 -8 15 7810.53 1170.31 6
 3 -8 15 7162.37 973.737 4
 3 -8 15 7475.76 1128.86 6
 -3 8 15 6990.66 1416.96 4
 3 8 15 7366.52 1055.32 1
 3 8 15 7989.61 1439.26 4
 -3 -8 17 3596.38 803.31 6
 3 -8 17 4022.59 879.368 6
 3 8 17 3020.49 972.275 4
 -3 8 17 2479.66 658.947 1
 3 -8 17 3480.4 720.307 4
 -3 8 17 2462.64 812.727 4
 3 8 19 732.099 549.171 4
 -3 -8 19 637.285 288.808 6
 3 -8 19 1016.29 395.06 4
 3 -8 19 1195.34 424.017 6
 -3 8 19 1126.7 579.474 4
 3 -8 21 5500.24 1161.75 6
 -3 8 21 4689.23 1294.18 4
 3 8 21 6205.91 1449.94 4
 -3 -8 21 5099.55 1123.79 6
 -3 8 23 1038.06 718.802 4
 3 -9 -24 1522.23 632.962 5
 3 -9 -22 1321.22 717.199 5
 -3 -9 -22 1546.39 653.857 5
 3 9 -22 1580.38 663.405 3
 3 -9 -22 1310.37 725.726 2
 -3 -9 -20 3072.7 1066.44 2
 -3 9 -20 2009.17 786.579 5
 3 -9 -20 1197.18 516.949 5
 3 9 -20 1474.88 653.784 3
 3 9 -20 795.136 393.89 5
 3 -9 -20 3004.73 1020.97 2
 -3 -9 -20 3039.54 921.157 5
 3 9 -18 4685.35 1147.55 5
 -3 9 -18 4613.53 939.692 3
 3 -9 -18 5385.73 1192.94 2
 -3 -9 -18 4928.91 1190.87 2
 -3 9 -18 6354.63 1382.74 5
 -3 -9 -18 6090.43 1296.51 5
 3 9 -18 5136.74 1088.71 3
 3 -9 -18 5227.96 1137.5 5
 -3 -9 -16 8574.54 1482.21 2
 -3 -9 -16 7565.61 1276.31 5
 3 9 -16 8114.39 1305.58 3
 -3 9 -16 8621.26 1468.07 5
 3 -9 -16 7785.3 1233.17 5
 3 -9 -16 8099.06 1385.84 2
 -3 9 -16 10518 1372.39 3
 3 9 -16 8939.43 1470.2 5
 -3 -9 -14 24932.3 2091.54 5
 -3 9 -14 31451.1 2556.01 5
 3 9 -14 29395.9 2473.22 5
 3 -9 -14 26412.6 2387.25 2
 -3 -9 -14 25380.2 2398.95 2
 3 9 -14 24716.2 2190.32 3
 -3 9 -14 25765 2115.83 3
 3 -9 -14 25118.3 1994.03 5
 3 -9 -12 3080.73 773.553 2
 -3 -9 -12 1951.89 627.68 2
 -3 9 -12 2902.81 653.706 3
 3 9 -12 2818.42 524.383 4
 -3 -9 -12 3288.56 710.031 5
 3 9 -12 2050.61 570.203 3
 3 9 -12 3371.3 844.047 5
 3 -9 -12 3657.75 693.856 5
 -3 9 -12 3247.06 763.831 5
 3 -9 -10 81840.6 2842.57 5
 3 9 -10 81063 3549.66 5
 3 9 -10 75627.6 3609.01 3
 -3 9 -10 70022.2 3476.04 3
 -3 9 -10 80151.6 2786.75 1
 3 -9 -10 76038.5 3765.93 2
 -3 -9 -10 81733.6 3134.71 5
 3 9 -10 76113.4 2465.96 4
 -3 -9 -10 85134.3 3939.63 2
 3 9 -8 84114 2317.13 4
 -3 -9 -8 89005 2893.44 5
 -3 9 -8 99078.6 3486.13 5
 -3 -9 -8 78051.7 1691.19 8
 3 9 -8 89944.4 3805.15 3
 -3 9 -8 92386.9 3088.74 1
 3 -9 -8 90946.7 2568.82 5
 -3 -9 -8 88089 3879.16 2
 3 -9 -8 87409.2 4074.49 2
 3 9 -8 96395.1 3510.12 5
 -3 9 -8 80305.4 3777.81 3
 3 -9 -6 15341.9 858.593 5
 -3 -9 -6 14130.6 1575.2 2
 3 -9 -6 11640.4 1535.94 2
 -3 9 -6 14842.1 1281.01 1
 3 9 -6 14174.5 933.363 4
 -3 9 -6 14640.3 1149.95 5
 3 9 -6 14222.1 1502.68 3
 -3 -9 -6 15688.9 1088.88 5
 -3 -9 -6 14469.5 881.194 8
 3 9 -6 15627.7 1296.83 5
 -3 -9 -4 7589.75 778.785 8
 -3 9 -4 7092.6 673.421 5
 -3 -9 -4 6252.14 1121.31 2
 3 -9 -4 7122.33 535.987 8
 3 9 -4 7229.49 840.064 5
 3 9 -4 8384.3 1195.39 3
 3 -9 -4 7214.86 1352.06 2
 3 9 -4 8210.5 1052.71 1
 -3 9 -4 7433.87 869.537 1
 3 -9 -4 7554.34 856.501 7
 3 -9 -2 2135.52 385.365 7
 -3 9 -2 2199.16 485.438 1
 3 -9 -2 3125.11 1083.49 2
 -3 9 -2 2414.71 308.582 5
 -3 -9 -2 2952.11 744.967 2
 3 9 -2 2606.53 639.741 1
 3 9 0 41429.5 2252.39 1
 -3 -9 0 40839.1 1584.24 5
 -3 -9 0 46738.4 3268.28 2
 -3 -9 0 55389 5154.22 6
 -3 9 0 45046 2148.72 7
 3 -9 0 41688.1 1484.44 7
 3 -9 0 50554.8 4471.21 6
 3 9 0 38117.7 1289.41 7
 -3 9 0 42673.7 2125 1
 -3 9 2 2180.1 493.954 1
 3 -9 2 2177.05 286.989 7
 -3 9 2 2475.96 479.169 7
 3 9 2 2436.47 559.327 1
 3 -9 2 2453.61 723.673 6
 -3 -9 2 3444.87 1054.45 6
 -3 -9 2 2253.26 396.801 5
 3 -9 2 2118.57 300.07 5
 -3 9 4 7123.1 866.874 7
 3 -9 4 7486.49 559.757 7
 3 -9 4 8374.14 1120.39 6
 -3 9 4 7858.67 965.403 1
 -3 -9 4 6185.26 1117.27 6
 3 9 4 11084.5 1323.87 1
 3 -9 4 7485.39 694.59 5
 -3 -9 4 8066.73 840.643 5
 3 -9 6 15775.9 1462.31 6
 -3 9 6 15344.6 1347.12 1
 3 -9 6 14399.2 1066.59 1
 -3 -9 6 12707 584.466 7
 -3 -9 6 16030.9 1683.33 6
 3 9 6 15255.4 1396.62 1
 -3 9 6 13963.3 777.679 5
 3 -9 8 96659.5 3555.06 6
 3 9 8 83279.6 3372.13 1
 -3 -9 8 86196.3 2023.26 7
 -3 9 8 87037.6 3413.09 1
 -3 -9 8 89116.9 3777.6 6
 3 -9 8 87099.7 2515.67 1
 -3 9 8 82601.9 2372.03 5
 -3 -9 10 79889.7 2350.25 7
 3 -9 10 79983 2880.67 4
 3 -9 10 78743.4 2278.56 1
 3 -9 10 87471.6 3497.45 6
 -3 -9 10 84476.3 3682.9 6
 3 9 10 84096.4 4147.05 4
 3 9 10 75848.7 3286.81 1
 -3 9 10 83293.9 3406.66 1
 3 -9 12 3115.04 685.144 6
 3 -9 12 2917.33 568.458 4
 -3 -9 12 2803.8 441.064 4
 -3 -9 12 2623.6 692.659 6
 3 9 12 3266.73 740.323 1
 3 9 12 3439.95 934.935 4
 -3 9 12 2311.74 608.319 1
 3 -9 14 27632 2193.45 6
 3 9 14 28982.7 2724.1 4
 -3 -9 14 26256.9 2172.92 6
 3 9 14 22422.6 1882.42 1
 3 -9 14 27296.5 1827.52 4
 -3 9 14 22649.3 1924.68 1
 3 -9 16 9524.05 1170.13 4
 3 9 16 9978.71 1701.31 4
 3 9 16 5275.63 926.084 1
 -3 -9 16 7983.56 1231.03 6
 -3 9 16 9081.99 1662.14 4
 3 -9 16 12147.9 1503.82 6
 -3 9 16 8551.11 1199.22 1
 -3 9 18 3979.53 1122.3 4
 3 9 18 3596.14 1105.91 4
 3 -9 18 4175.72 807.065 4
 3 -9 18 4105.93 981.696 6
 -3 -9 18 5362.88 1149.91 6
 3 9 20 1825.16 701.135 4
 -3 9 20 2320.9 901.875 4
 3 -9 20 2238.16 775.234 6
 -3 -9 20 1249.19 641.128 6
 -3 9 22 915.751 750.858 4
 -3 -9 22 941.428 452.532 6
 3 9 22 1816.58 1027.31 4
 -3 -10 -23 613.753 257.136 5
 -3 -10 -21 3019.01 961.043 5
 3 -10 -21 1111.73 569.55 5
 -3 10 -21 2215.84 918.426 5
 3 -10 -21 2222.99 951.156 2
 3 10 -21 2420.6 845.844 3
 -3 -10 -21 2883.19 1072.8 2
 3 10 -21 1821.75 848.15 5
 -3 10 -19 358.782 173.741 3
 -3 -10 -19 214.427 205.335 5
 3 10 -19 471.157 286.928 3
 -3 10 -19 -539.141 632.315 5
 -3 -10 -19 474.442 387.993 2
 3 -10 -19 369.126 255.584 5
 3 -10 -19 563.418 436.328 2
 3 10 -19 277.631 435.673 5
 -3 -10 -17 119.812 176.636 2
 3 -10 -17 644.509 520.527 2
 -3 10 -17 -179.315 303.864 3
 3 -10 -17 121.241 256.284 5
 -3 -10 -17 447.236 188.771 5
 3 10 -17 147.317 235.295 5
 3 10 -17 197.383 393.762 3
 -3 10 -17 -333.23 352.999 5
 3 10 -15 3602 924.648 3
 3 10 -15 4210.69 1065.36 5
 3 -10 -15 4006.04 823.543 5
 -3 10 -15 3750.4 941.106 5
 -3 -10 -15 3578.22 930.67 2
 -3 -10 -15 3782.99 846.676 5
 3 -10 -15 4344.71 1038.53 2
 -3 10 -15 3105.08 776.462 3
 -3 10 -13 4592.7 934.85 5
 3 10 -13 5735.81 1090.78 5
 3 -10 -13 5084.26 1082.46 2
 -3 10 -13 4031.46 839.824 3
 3 -10 -13 4349.57 794.588 5
 -3 -10 -13 4710.9 873.63 5
 3 10 -13 5060.66 1039.79 3
 -3 -10 -13 5032.49 1065.12 2
 3 10 -11 5711.94 729.935 4
 3 -10 -11 7085.96 872.939 5
 -3 -10 -11 5503.55 1055.9 2
 3 -10 -11 6504.98 1147.75 2
 -3 -10 -11 7813.65 1016.8 5
 3 10 -11 6516.8 1071.97 5
 3 10 -11 5621.94 1063.9 3
 -3 10 -11 5468.95 1050.99 3
 -3 10 -11 7580.21 1121.12 5
 -3 -10 -9 17979.8 1906.69 2
 -3 -10 -9 17958.4 1372.97 5
 3 10 -9 15292.6 1091.69 4
 -3 10 -9 17840.3 1447.15 1
 3 10 -9 16973.9 1765.67 3
 3 -10 -9 17264.9 1931.16 2
 -3 10 -9 19194.1 1576.91 5
 -3 10 -9 17500.4 1847.54 3
 3 -10 -9 18296.7 1231.79 5
 3 10 -9 19402.5 1679.99 5
 -3 -10 -7 1655.02 289.547 8
 -3 -10 -7 2147.71 410.804 5
 3 10 -7 2572.52 566.531 5
 -3 10 -7 1692.45 446.357 1
 3 -10 -7 1372.24 601.258 2
 -3 10 -7 2517.99 735.592 3
 -3 10 -7 1543.87 420.471 5
 3 10 -7 2501.22 700.657 3
 -3 -10 -7 2644.65 718.049 2
 3 -10 -7 1641.42 311.366 5
 3 10 -7 1675.78 346.474 4
 -3 10 -5 16891 1383.87 1
 -3 -10 -5 15764.9 1750.22 2
 3 -10 -5 12486.1 1776.38 2
 3 -10 -5 15768.9 757.317 8
 3 10 -5 14379.5 1211.94 4
 3 -10 -5 16978.1 744.885 5
 -3 10 -5 17825.4 1187.9 5
 3 10 -5 19668 1500.08 5
 3 10 -5 17773.8 1592.23 1
 3 10 -5 19187.7 1837.24 3
 -3 -10 -5 16222 1034.31 5
 -3 -10 -5 15777.3 1080.58 8
 3 10 -3 1200.89 550.971 3
 -3 -10 -3 698.7 474.876 2
 -3 10 -3 269.099 157.84 1
 3 10 -3 296.441 222.265 1
 3 -10 -3 1049.26 750.862 2
 -3 10 -3 503.613 147.266 5
 3 -10 -3 917.096 293.483 7
 -3 10 -1 1073.31 441.109 7
 -3 10 -1 953.865 434.583 1
 3 10 -1 854.706 340.235 1
 -3 -10 -1 1610.5 671.439 2
 3 -10 -1 1032.77 256.369 7
 3 -10 -1 2426.03 1149.7 6
 -3 10 -1 1160.95 184.21 5
 3 -10 -1 1545.71 948.597 2
 3 10 -1 881.216 170.185 7
 3 -10 1 927.267 208.136 7
 -3 -10 1 964.636 232.869 5
 -3 10 1 1009.97 364.564 1
 3 -10 1 1898.68 914.289 6
 3 10 1 1033.05 262.979 7
 -3 -10 1 1297.99 430.496 6
 -3 -10 1 1002.41 444.069 2
 3 10 1 779.928 240.104 1
 -3 10 1 1120.5 348.186 7
 -3 10 3 1274.03 411.083 1
 3 -10 3 538.604 159.666 5
 3 -10 3 625.862 143.427 7
 3 10 3 205.27 76.3035 7
 3 -10 3 545.513 317.209 6
 -3 -10 3 795.984 248.282 5
 3 10 3 343.253 255.712 1
 -3 -10 3 1291.99 783.016 6
 -3 10 3 422.804 200.327 7
 3 -10 5 17765.2 1667.41 6
 3 -10 5 16397.3 815.542 7
 -3 10 5 17554.3 1542.47 1
 3 -10 5 16321.6 1121.7 5
 3 10 5 17101.1 1566.07 1
 -3 -10 5 14799.4 1879.52 6
 -3 10 7 2424.81 629.587 1
 3 -10 7 1127.86 477.21 6
 -3 -10 7 1324.74 191.629 7
 3 10 7 1448.74 474.888 1
 -3 10 9 17023.3 1623.23 1
 -3 -10 9 15995.4 1736.5 6
 3 10 9 17562.6 1620.04 1
 -3 10 9 16940.5 1134.16 5
 -3 -10 9 16788 924.314 7
 3 -10 9 16561.2 1140.21 1
 3 -10 9 18863.5 1675.1 6
 3 -10 11 7214.88 1073.06 6
 -3 -10 11 6683.16 1123.68 6
 -3 10 11 6130.56 973.018 1
 3 10 11 6537.46 1248.12 4
 3 -10 11 5536.24 674.625 7
 3 -10 11 5762.4 638.701 1
 3 10 11 6744 1031.01 1
 -3 -10 11 6003.97 668.169 7
 3 10 13 6777.34 1313.79 4
 3 10 13 5060.08 901.04 1
 3 -10 13 4864.99 744.572 4
 -3 -10 13 5642.9 1058.97 6
 -3 10 13 5860.67 1028.54 1
 3 -10 13 5812.37 1000.49 6
 -3 10 15 3136.06 993.171 4
 3 10 15 3959.27 1040 4
 -3 -10 15 4816.51 999.308 6
 3 -10 15 4558.92 777.383 4
 3 -10 15 3223.01 803.556 6
 -3 10 15 4188.74 895.626 1
 3 10 15 3645.43 806.872 1
 -3 10 17 222.075 258.335 1
 3 -10 17 201.77 171.721 4
 -3 10 17 658.313 538.66 4
 3 10 17 552.059 318.757 4
 -3 -10 17 -371.228 418.853 6
 3 -10 17 -171.023 154.353 6
 3 10 17 -30.285 111.253 1
 3 10 19 -208.196 420.553 4
 3 -10 19 845.558 486.38 6
 -3 -10 19 -89.5745 223.444 6
 -3 10 19 -259.324 496.884 4
 3 -10 21 1008.66 509.989 6
 -3 -10 21 1446.08 569.998 6
 -3 10 21 1935.62 909.7 4
 3 10 21 1704.7 662.601 4
 -3 -11 -22 342.11 347.311 5
 3 11 -22 -249.805 508.733 3
 -3 11 -20 139.067 287.708 5
 3 11 -20 313.992 522.208 3
 3 -11 -20 491.112 588.921 2
 3 -11 -20 -55.0365 213.322 5
 3 11 -20 -87.9803 515.179 5
 -3 -11 -20 262.964 313.652 5
 3 -11 -18 835.874 391.13 5
 -3 -11 -18 1222.78 634.886 5
 -3 11 -18 954.005 554.715 5
 3 11 -18 1644.55 690.717 3
 -3 11 -18 682.532 387.045 3
 3 -11 -18 1367.32 750.448 2
 -3 -11 -18 793.483 561.944 2
 3 11 -18 626.643 461.45 5
 -3 11 -16 738.104 519.975 5
 3 11 -16 823.991 384.053 5
 -3 11 -16 105.153 229.612 3
 -3 -11 -16 571.956 366.551 2
 3 -11 -16 723.46 373.72 5
 -3 -11 -16 626.555 385.937 5
 3 -11 -16 156.839 239.086 2
 3 11 -16 599.403 528.723 3
 3 -11 -14 3535.6 928.197 2
 -3 -11 -14 5037.08 1146.76 2
 3 11 -14 4047.56 932.158 3
 -3 11 -14 3736.94 912.89 3
 3 -11 -14 5535 904.407 5
 3 11 -14 3786.07 915.503 5
 -3 11 -14 4558.93 960.754 5
 -3 -11 -14 4839.83 912.219 5
 -3 11 -12 5931.92 1005.15 5
 3 -11 -12 4348.07 969.676 2
 -3 -11 -12 5484.93 881.125 5
 3 11 -12 3689.64 877.866 3
 3 -11 -12 6012 869.944 5
 3 11 -12 5924.8 1052.45 5
 -3 -11 -12 6604.11 1262.15 2
 -3 11 -12 4919.37 1049.07 3
 -3 -11 -10 5417.04 789.532 5
 3 -11 -10 4379.31 1058.87 2
 -3 11 -10 4017.11 728.341 1
 -3 -11 -10 5306.2 1068.18 2
 3 11 -10 6252.91 1016.09 5
 -3 11 -10 5270.86 864.482 5
 3 11 -10 5787.82 1141.59 3
 -3 11 -10 4365.24 975.057 3
 3 11 -10 4370.19 617.092 4
 3 -11 -10 6181.57 750.245 5
 -3 11 -8 -100.031 276.662 1
 3 -11 -8 320.498 137.207 5
 -3 11 -8 261.246 229.813 5
 -3 -11 -8 70.8192 152.521 5
 3 -11 -8 215.668 337.15 2
 -3 -11 -8 165.542 65.2776 8
 3 11 -8 158.213 281.904 5
 -3 -11 -8 255.677 302.33 2
 3 11 -8 48.5878 298.486 3
 -3 11 -8 672.651 428.42 3
 3 11 -8 -58.0324 177.911 4
 3 -11 -6 934.9 203.564 5
 -3 11 -6 1153.56 429.659 1
 -3 -11 -6 522.974 364.789 2
 3 -11 -6 978.51 196.428 8
 3 11 -6 731.103 222.441 4
 -3 -11 -6 678.2 219.136 8
 -3 -11 -6 977.128 295.225 5
 -3 11 -6 1200.82 353.16 5
 3 11 -6 1165.06 419.971 5
 3 -11 -6 825.508 508.462 2
 3 11 -6 341.711 159.957 3
 3 11 -4 5768.5 1056.43 3
 -3 -11 -4 5903.7 1129.43 2
 3 -11 -4 6380.05 1451.96 2
 -3 11 -4 5127.4 603.354 5
 -3 -11 -4 5293.89 706.595 8
 3 -11 -4 4670.04 519.872 8
 3 11 -4 4882.28 873.105 1
 -3 11 -4 5585.05 871.686 1
 3 -11 -2 17435.6 1180.15 7
 3 11 -2 18601.6 1683.42 1
 -3 -11 -2 21938.1 2375.5 2
 -3 11 -2 17109.9 865.593 5
 -3 11 -2 19116.8 1564.77 1
 -3 -11 0 12995.6 1944.5 2
 3 -11 0 12357.5 2495.7 6
 3 11 0 11451.3 1304.9 1
 3 11 0 9726.19 707.159 7
 3 -11 0 10540.7 776.814 7
 -3 11 0 10265.9 1163.23 1
 -3 -11 0 11133.7 802.761 5
 -3 11 0 10849.6 1183.45 7
 3 -11 2 18877.6 2324.34 6
 -3 -11 2 16954.1 1091.34 5
 -3 11 2 18195.8 1569.12 1
 -3 -11 2 17827.4 2510.07 6
 -3 11 2 19355.3 1426.72 7
 3 11 2 17483 1604.95 1
 3 -11 2 17907.2 837.109 7
 3 11 2 16953.4 1173.37 7
 3 -11 4 4893.95 576.298 5
 3 -11 4 5160.47 1017.18 6
 -3 -11 4 5506.2 1313.97 6
 3 11 4 5418.28 940.249 1
 -3 11 4 5459.84 882.083 1
 3 -11 4 4598.36 357.655 7
 -3 -11 4 4938.13 659.075 5
 3 -11 6 544.051 186.966 6
 -3 -11 6 951.535 441.964 6
 3 11 6 966.615 403.013 1
 3 -11 6 814.024 186.337 7
 3 11 8 433.45 345.282 1
 -3 -11 8 54.25 61.223 7
 -3 -11 8 4.21547 276.953 6
 -3 11 8 824.868 439.466 1
 3 -11 8 416.074 305.309 6
 3 -11 10 5282.74 580.651 7
 -3 -11 10 4226.57 482.213 7
 -3 -11 10 5168.97 1005.89 6
 3 -11 10 5175.25 935.254 6
 3 11 10 4569.84 979.617 4
 3 11 10 5250.73 939.699 1
 -3 11 10 5656.47 989.527 1
 3 -11 12 5842.38 1016.84 6
 -3 -11 12 6588.5 1192.81 6
 3 11 12 6607.15 1293.72 4
 -3 11 12 4787.42 912.722 1
 3 11 12 5712.29 1014.79 1
 3 11 14 4191.92 1110.18 4
 3 -11 14 4734.99 924.529 6
 -3 11 14 5444.54 1006.39 1
 -3 -11 14 5277.7 1066.08 6
 3 11 14 4401.14 911.45 1
 -3 11 16 1105.08 543.803 1
 3 11 16 194.847 264.095 1
 3 11 16 377.177 464.494 4
 3 -11 16 113.756 231.355 6
 3 -11 16 264.675 182.09 4
 -3 -11 16 337.24 169.679 6
 -3 11 16 201.912 309.627 4
 -3 11 18 530.218 356.219 1
 -3 -11 18 1442.24 545.657 6
 3 11 18 1795.21 848.569 4
 3 -11 18 642.767 192.142 6
 -3 11 18 187.184 270.504 4
 -3 -11 20 -165.431 376.666 6
 3 -11 20 713.165 492.844 6
 3 11 20 59.0072 321.223 4
 -3 11 20 -11.662 478.857 4
 3 12 -21 -51.2678 458 3
 -3 12 -21 -266.636 316.422 5
 3 -12 -21 183.476 387.733 2
 -3 -12 -19 947.235 688.715 2
 -3 12 -19 984.035 562.105 3
 3 12 -19 1374.85 722.962 3
 3 12 -19 664.29 590.464 5
 -3 12 -19 51.6743 351.102 5
 -3 -12 -19 47.8931 412.15 5
 3 -12 -19 598.14 442.091 2
 -3 -12 -17 92.9089 359.444 2
 3 12 -17 -214.396 361.597 5
 3 12 -17 350.745 310.828 3
 3 -12 -17 746.638 556.95 2
 -3 12 -17 145.147 233.432 5
 -3 12 -17 244.881 233.031 3
 -3 -12 -17 -18.9658 186.328 5
 3 -12 -17 214.423 325.944 5
 3 12 -15 137.801 178.447 5
 -3 12 -15 532.556 321.865 3
 -3 -12 -15 324.865 205.428 5
 -3 12 -15 563.341 527.831 5
 -3 -12 -15 293.872 362.153 2
 3 -12 -15 264.222 193.249 5
 3 12 -15 798.183 514.084 3
 3 -12 -15 738.474 494.754 2
 3 -12 -13 692.904 404.543 2
 -3 -12 -13 1016.78 407.58 5
 -3 -12 -13 738.45 436.821 2
 -3 12 -13 238.427 212.803 3
 3 12 -13 1352.96 532.475 5
 3 12 -13 240.961 343.77 3
 3 -12 -13 955.465 319.041 5
 -3 12 -13 626.42 336.011 5
 -3 12 -11 75.1465 148.534 5
 3 12 -11 508.937 317.076 5
 3 -12 -11 277.151 156.736 5
 3 -12 -11 471.71 493.611 2
 -3 12 -11 150.193 220.486 3
 -3 -12 -11 394.601 192.756 2
 -3 -12 -11 182.069 221.786 5
 3 12 -11 3.93416 347.505 3
 3 -12 -9 584.712 438.82 2
 -3 -12 -9 242.721 76.3361 8
 3 12 -9 228.92 57.2472 4
 -3 12 -9 924.118 572.754 3
 -3 12 -9 283.465 273.156 1
 3 12 -9 360.144 248.103 5
 -3 12 -9 481.916 292.871 5
 3 -12 -9 341.045 168.944 5
 3 12 -9 503.056 334.485 3
 -3 -12 -9 439.564 232.978 5
 -3 -12 -9 990.974 595.682 2
 -3 12 -7 690.231 355.337 1
 -3 12 -7 736.089 323.103 5
 -3 -12 -7 606.875 195.361 5
 -3 12 -7 661.417 550.285 3
 -3 -12 -7 676.483 324.668 2
 3 -12 -7 1204.35 241.248 5
 3 12 -7 1417.15 418.948 5
 3 12 -7 1087.18 539.475 3
 3 -12 -7 1014.91 640.778 2
 -3 -12 -7 702.352 210.539 8
 3 12 -7 683.551 254.66 4
 3 12 -5 1892.35 559.042 4
 3 -12 -5 1553.09 654.446 2
 -3 12 -5 2861.82 656.948 1
 -3 -12 -5 2988.86 532.658 8
 3 -12 -5 2765.82 378.41 8
 -3 -12 -5 2754.4 404.289 5
 3 12 -5 1981.09 466.324 1
 3 12 -5 3266.1 827.858 3
 -3 -12 -5 2957.28 892.879 2
 -3 12 -5 2330.66 433.051 5
 -3 12 -3 3305.22 710.291 1
 -3 -12 -3 4308.19 1087.45 2
 -3 12 -3 2954.67 433.631 5
 3 -12 -3 4438.9 1267.21 2
 3 12 -3 3712.51 804.611 1
 -3 -12 -1 3166.94 413.563 5
 3 12 -1 2674.47 319.272 7
 3 -12 -1 2996.2 472.741 7
 -3 -12 -1 4469.76 1234.25 2
 -3 12 -1 3237.82 828.746 7
 -3 12 -1 3579.82 676.13 1
 3 12 -1 2911.17 691.781 1
 3 -12 -1 2577.53 941.933 2
 3 -12 1 3393.28 1100.29 6
 3 12 1 3030.88 457.952 7
 -3 12 1 2873.24 673.556 1
 -3 -12 1 2342.65 912.234 6
 -3 12 1 3472.54 638.526 7
 3 12 1 2937.43 680.549 1
 -3 -12 1 3608.79 1068.94 2
 3 -12 1 2956.75 393.081 7
 -3 -12 1 3520.41 482.557 5
 3 12 3 1890.61 486.861 1
 -3 12 3 3083.58 698.059 1
 -3 -12 3 2325.38 1007.41 6
 3 -12 3 2071.58 254.972 7
 -3 -12 3 2237.02 395.436 5
 3 -12 3 2531.35 386.528 5
 3 -12 3 2290.81 657.058 6
 3 12 3 2540.94 520.409 7
 3 12 5 2755.36 738.501 1
 -3 12 5 2824.45 716.655 1
 -3 -12 5 3639.52 1052.38 6
 3 -12 5 2950.09 824.607 6
 3 -12 5 3071.14 501.942 5
 3 -12 5 2573.86 233.577 7
 -3 -12 7 595.388 235.601 6
 3 -12 7 1156.16 206.241 7
 3 12 7 1281.94 446.922 1
 3 -12 7 1240.14 424.677 6
 -3 12 7 1518.35 460.778 1
 -3 -12 9 492.47 316.855 6
 3 12 9 773.339 376.259 1
 3 -12 9 626.151 349.007 6
 -3 12 9 877.717 415.512 1
 3 12 11 388.46 401.093 4
 3 -12 11 150.147 281.149 6
 -3 12 11 497.014 433.14 1
 -3 -12 11 516.995 434.349 6
 3 12 11 788.162 409.409 1
 -3 -12 13 739.947 418.051 6
 -3 12 13 815.551 478.897 1
 3 12 13 939.986 468.713 1
 3 -12 13 932.334 395.15 6
 3 12 13 1271.57 517.159 4
 3 12 15 609.236 366.974 1
 3 -12 15 71.9608 321.099 6
 -3 12 15 936.848 415.624 1
 -3 -12 15 235.118 250.282 6
 3 12 15 218.681 419.756 4
 -3 12 17 356.256 539.322 4
 -3 -12 17 489.984 375.907 6
 3 12 17 -229.55 330.845 4
 3 -12 17 -61.8091 281.9 6
 3 12 17 162.625 220.133 1
 -3 12 17 644.945 451.895 1
 3 -12 19 492.68 325.258 6
 -3 12 19 854.815 799.578 4
 -3 -12 19 650.484 573.664 6
 3 12 19 414.706 444.536 4
 3 13 -22 3400.92 1051.11 3
 3 13 -20 1678.45 762.06 3
 -3 13 -20 1104.24 633.912 5
 3 13 -20 1899.69 785.678 5
 3 -13 -20 1449.53 809.997 2
 -3 -13 -18 1674.22 766.749 2
 3 13 -18 1118.89 543.462 3
 3 13 -18 1040.94 554.307 5
 -3 13 -18 2188.12 842.878 3
 -3 13 -18 1054.71 684.994 5
 3 -13 -18 963.727 687.521 2
 -3 13 -16 2653.84 854.254 5
 -3 -13 -16 2310.25 892.424 2
 3 13 -16 2121.16 772.512 3
 -3 13 -16 1566.69 655.132 3
 -3 -13 -16 1614.33 566.068 5
 3 -13 -16 2280.23 914.84 2
 3 13 -16 1608.99 659.02 5
 3 13 -14 4779.91 1041.35 5
 3 13 -14 3702.88 987.665 3
 -3 -13 -14 3236.77 949.519 2
 -3 13 -14 5314.62 1107.11 5
 3 -13 -14 4642.86 784.564 5
 3 -13 -14 4146.03 1118.78 2
 -3 13 -14 2895.63 883.453 3
 -3 -13 -14 6139.75 1036.99 5
 -3 13 -12 14503.2 1943.56 3
 3 13 -12 15410.8 2002.84 3
 3 -13 -12 13845.1 2048.05 2
 3 13 -12 19324.3 1990.57 5
 -3 -13 -12 19607.1 1638.82 5
 -3 -13 -12 15555.4 2158.48 2
 3 -13 -12 18766.9 1463.84 5
 -3 13 -12 16947.9 1751.95 5
 -3 13 -10 577.25 269.898 3
 -3 13 -10 1211.85 442.468 5
 3 13 -10 1285.96 522.148 5
 -3 13 -10 772.525 356.286 1
 -3 -13 -10 470.248 439.004 2
 3 13 -10 1018.48 463.415 3
 -3 -13 -10 951.977 346.749 5
 3 -13 -10 789.622 277.575 5
 3 -13 -10 632.14 562.401 2
 -3 -13 -8 21916.6 1369.59 5
 -3 13 -8 22293.1 2437.97 3
 3 13 -8 26518.8 2500.99 3
 3 -13 -8 24138.2 1155.39 5
 -3 13 -8 23220.2 1707.29 5
 3 13 -8 16530 1310.14 4
 3 13 -8 23224 1868.59 5
 -3 13 -8 22870 1949.58 1
 3 -13 -8 15001.3 2153.52 2
 -3 -13 -8 17406.2 2176.91 2
 -3 -13 -8 15673.3 955.404 8
 3 13 -6 3858.28 753.645 4
 -3 -13 -6 5636.05 599.848 5
 3 13 -6 6600.69 966.107 5
 3 13 -6 5281.01 958.593 1
 -3 -13 -6 4061.47 1080.14 2
 3 13 -6 6546.05 1247.17 3
 3 -13 -6 5048.34 475.838 8
 -3 -13 -6 4435.85 641.533 8
 -3 13 -6 5691.3 761.494 5
 -3 13 -6 5862.48 966.558 1
 3 -13 -6 4547.87 1215.72 2
 3 13 -4 65218.4 3794.82 3
 3 -13 -4 57189.4 2011.79 8
 -3 13 -4 61433.7 2126.77 5
 3 -13 -4 72040.1 5212.47 2
 -3 -13 -4 59645.3 1788.46 5
 3 13 -4 60428 3309.59 1
 -3 13 -4 59922.5 3132.93 1
 -3 -13 -4 61227.9 4123.55 2
 -3 -13 -2 13291.5 836.985 5
 -3 13 -2 16188.1 921.059 5
 -3 13 -2 15163 1599.77 1
 -3 -13 -2 17766.1 2282.15 2
 3 -13 -2 18918.5 2716.37 2
 3 13 -2 16009.7 1695.95 1
 3 13 0 25009.3 1206.86 7
 -3 13 0 29697.5 2213.4 1
 3 13 0 25174.8 2121.87 1
 3 -13 0 32262.1 3905.87 6
 3 -13 0 34732.3 3599.29 2
 -3 -13 0 27130.2 1238.33 5
 -3 13 0 29592.6 2189.39 7
 -3 -13 0 33267.1 3175.49 2
 -3 -13 2 14208.5 1012.39 5
 -3 13 2 15929.9 1628.96 1
 -3 -13 2 13908.6 2388.94 6
 -3 13 2 15567.9 1401.87 7
 3 -13 2 13867.4 749.97 7
 3 -13 2 16758.8 2371.45 6
 3 13 2 13677.7 1098.77 7
 3 13 2 15331.2 1659.64 1
 -3 -13 4 54695.9 4276.21 6
 3 -13 4 54844.6 3795.28 6
 -3 13 4 62226.2 3273.58 1
 3 -13 4 55474.5 2006.22 5
 3 13 4 55549.7 3201.5 1
 3 -13 6 4864.97 1035.37 6
 -3 13 6 5273.84 964.901 1
 3 13 6 5492.92 1056.77 1
 -3 -13 6 6717.99 1424.25 6
 3 -13 8 19174.8 736.807 7
 -3 13 8 22958.8 2070.72 1
 -3 -13 8 21405.5 2360.94 6
 3 13 8 23827.4 2163.83 1
 3 -13 8 21655.8 2147.03 6
 3 -13 10 1197.99 523.453 6
 -3 13 10 1554.42 599.677 1
 -3 -13 10 1541.47 641.544 6
 3 13 10 1235.02 560.998 1
 -3 13 12 18774.6 1982.81 1
 -3 -13 12 16844.4 2042.89 6
 3 13 12 17059.7 1910.01 1
 3 -13 12 19087.3 2037.2 6
 3 13 12 15621 2100.94 4
 3 13 14 3938.19 1081.28 4
 -3 -13 14 4205.12 1058.56 6
 -3 13 14 5998.53 1173.75 1
 3 13 14 5217.51 1063.17 1
 3 -13 14 4189.51 1009.77 6
 -3 13 16 2398.67 737.751 1
 -3 13 16 2971.24 1072.98 4
 3 -13 16 2731.26 916.594 6
 3 13 16 1025.77 494.364 4
 -3 -13 16 2722.66 890.863 6
 3 13 16 1703.36 548.695 1
 -3 13 18 861.232 507.26 4
 3 13 18 2043.56 839.885 4
 -3 -13 18 1682.75 804.741 6
 -3 13 18 902.395 526.506 1
 3 -13 18 1857.16 707.936 6
 -3 13 20 1536.92 708.581 4
 -3 -13 20 2675.86 930.266 6
 3 14 -21 1133.52 603.38 3
 -3 14 -19 1547.08 672.939 3
 3 14 -19 1482.71 836.346 3
 -3 -14 -19 1362.44 878.773 2
 3 14 -19 1260.31 686.245 5
 3 -14 -19 393.12 257.534 2
 -3 14 -19 1004.37 621.075 5
 -3 -14 -17 3229.8 1088.47 2
 3 14 -17 4594.19 1209.39 3
 -3 14 -17 3019.08 977.794 3
 3 14 -17 4602.3 1157.44 5
 -3 14 -17 4139.69 1044.94 5
 3 -14 -17 4251.98 1251.14 2
 -3 -14 -15 -42.482 279.134 2
 -3 14 -15 553.063 381.023 5
 3 -14 -15 120.507 250.311 2
 3 14 -15 335.184 318.375 5
 -3 14 -15 348.827 350.524 3
 3 14 -15 222.527 276.585 3
 -3 -14 -13 7846.78 1586.87 2
 3 -14 -13 7364.33 1578.27 2
 3 14 -13 11959.5 1637.07 5
 -3 14 -13 9326.08 1634.51 3
 -3 14 -13 9781.25 1402.53 5
 3 14 -13 8751.25 1538.55 3
 -3 -14 -13 10671.5 1253.21 5
 -3 14 -11 9816.55 1298.66 5
 3 -14 -11 7745.98 1651.97 2
 -3 -14 -11 9384.35 1048.91 5
 -3 -14 -11 7163.42 1482.93 2
 -3 14 -11 9324.68 1659.38 3
 3 14 -11 8470.33 1559.12 3
 -3 14 -11 9834.76 1310.46 1
 3 14 -11 10136.5 1429.69 5
 -3 14 -9 12156.5 1315.44 5
 -3 14 -9 10825.4 1422 1
 -3 -14 -9 12597.3 1068.86 5
 -3 -14 -9 9354.18 1654.01 2
 3 14 -9 12901.5 1490.87 5
 3 14 -9 12011.5 1739.59 3
 3 -14 -9 9540.14 1823.65 2
 -3 14 -9 11305.5 1834.85 3
 3 -14 -7 1050.13 761.452 2
 -3 14 -7 1881.25 807.212 3
 -3 14 -7 669.401 335.852 1
 3 14 -7 2349.59 719.106 5
 -3 14 -7 1538.33 451.168 5
 -3 -14 -7 1751.69 366.618 5
 3 14 -7 2875.12 844.086 3
 3 -14 -7 1567.06 278.262 8
 -3 -14 -7 1436.9 342.866 8
 -3 -14 -7 1407.31 730.114 2
 3 -14 -5 9091.87 788.096 8
 -3 14 -5 11357.9 1430.58 1
 3 -14 -5 10537.9 2014.1 2
 -3 -14 -5 10308.1 1092.63 8
 -3 14 -5 11020.2 995.346 5
 -3 -14 -5 9322.99 1680.07 2
 3 14 -5 10623.6 1584.24 3
 -3 -14 -5 9970.71 724.115 5
 3 14 -5 9595.83 1367.83 1
 3 14 -3 4325.89 971.268 1
 -3 14 -3 4164.58 843.594 1
 -3 14 -3 4582.73 547.972 5
 -3 -14 -3 4659.92 484.935 5
 -3 -14 -3 4313.47 1199.03 2
 3 -14 -3 6118.69 1684.39 2
 3 14 -1 15774.3 836.663 7
 -3 -14 -1 22060.7 2656.1 2
 -3 -14 -1 15975.4 898.304 5
 -3 14 -1 18097.9 1787.4 1
 3 14 -1 19258.8 1920.16 1
 3 -14 -1 20444.8 2942.86 2
 -3 14 -1 21893.2 2281.44 7
 -3 14 1 17562.3 1795.1 1
 3 14 1 16002.7 1741.08 1
 -3 -14 1 21699 2587.49 2
 -3 -14 1 16699.5 1038.61 5
 3 -14 1 22512.5 3091.16 6
 3 14 1 15925.9 1116.94 7
 -3 14 1 16985.1 1583.48 7
 -3 -14 1 23954.3 3421.07 6
 -3 14 3 4037.64 845.781 1
 -3 -14 3 3381.82 1230.6 6
 3 -14 3 5011.25 1305.56 6
 3 14 3 5707.15 1061.44 1
 -3 -14 3 3640.73 553.983 5
 -3 -14 5 9421.16 1793.92 6
 3 -14 5 10709.9 1680.54 6
 3 14 5 8487.42 1307.9 1
 -3 14 5 9938.65 1402.28 1
 3 -14 5 9195.49 900.635 5
 3 14 7 2754.03 854.405 1
 -3 -14 7 1062.21 608.133 6
 -3 14 7 2045.81 658.081 1
 3 -14 7 1593.15 611.405 6
 3 14 9 11275.1 1562.63 1
 -3 14 9 13008.1 1647.54 1
 3 -14 9 10563.9 1573.49 6
 -3 -14 9 9735.77 1675.83 6
 -3 -14 11 7348.79 1386.88 6
 3 14 11 10614.4 1670.92 4
 -3 14 11 10454.2 1519.59 1
 3 14 11 9903.65 1473.43 1
 3 -14 11 8120.05 1349.98 6
 3 14 13 10125.8 1749.79 4
 -3 14 13 10039.5 1550.24 1
 -3 -14 13 9864.1 1604.92 6
 3 14 13 10576.2 1565.97 1
 3 -14 13 9484.22 1527.18 6
 3 14 15 217.847 342.299 4
 -3 14 15 161.918 464.153 1
 -3 -14 15 755.717 619.019 6
 3 14 15 -596.217 448.496 1
 3 -14 15 425.1 458.676 6
 3 14 17 3744.32 954.45 1
 3 -14 17 3581.46 1028.16 6
 -3 -14 17 4065.47 1088.55 6
 -3 14 17 3929.89 996.54 1
 -3 14 17 2841.61 1041.81 4
 3 14 17 2510.68 949.351 4
 -3 -14 19 886.832 492.833 6
 -3 14 19 -162.139 623.426 4
 3 -14 19 1385.09 723.244 6
 3 14 19 977.879 709.023 4
 3 15 -20 1686.2 829.914 3
 -3 15 -20 948.907 447.22 5
 -3 15 -18 -470.311 597.695 3
 3 15 -18 -103.177 265.7 5
 -3 -15 -18 993.982 839.4 2
 3 -15 -18 726.404 387.902 2
 -3 15 -18 -524.778 423.817 5
 3 15 -18 142.348 300.267 3
 -3 15 -16 2048.23 823.429 3
 3 -15 -16 5439.69 1465.21 2
 3 15 -16 3870.25 1139.53 3
 3 15 -16 4726.14 1188.96 5
 -3 15 -16 3509.66 948.127 5
 -3 -15 -16 3885.2 1271.84 2
 -3 -15 -14 3016.22 1058.38 2
 3 -15 -14 3050.72 1086.82 2
 -3 15 -14 3711.01 901.164 5
 -3 15 -14 1787.72 735.482 3
 3 15 -14 2556.97 777.677 3
 -3 15 -12 3662.35 874.387 5
 3 15 -12 3982.44 938.524 5
 3 15 -12 2388.41 857.069 3
 -3 15 -12 1826.71 784.957 3
 -3 -15 -12 2289.16 913.127 2
 3 -15 -12 2144.62 956.1 2
 -3 15 -10 15774.9 1788.29 1
 -3 -15 -10 9537.94 1765.71 2
 3 -15 -10 6814.51 1572.61 2
 -3 15 -10 15292.7 1547.21 5
 3 15 -10 16809.9 2187.22 3
 3 15 -10 16684.4 1794.23 5
 -3 15 -10 14259.1 2124.6 3
 3 15 -8 23209.7 2017.64 5
 -3 15 -8 22813.9 2701.02 3
 -3 15 -8 22206 1697.71 5
 -3 -15 -8 17929.4 2385.27 2
 -3 -15 -8 22217.6 1279.87 5
 3 -15 -8 14006.7 2305.84 2
 3 15 -8 23926 2552.54 3
 -3 15 -8 22373.5 2110.48 1
 -3 15 -6 5263.28 741.233 5
 3 15 -6 4667.63 1105.78 3
 3 -15 -6 4308.32 1241.8 2
 -3 -15 -6 4772.99 725.123 8
 -3 -15 -6 5166.59 521.29 5
 3 15 -6 4319.39 997.697 1
 -3 -15 -6 5100.23 1310.95 2
 -3 15 -6 4942.42 1021.99 1
 -3 -15 -4 2157.7 831.803 2
 3 15 -4 2442.48 811.671 3
 3 -15 -4 3221.39 1149.19 2
 3 15 -4 1854.47 689.721 1
 -3 15 -4 2078.12 412.338 5
 -3 -15 -4 1832.26 278.257 5
 -3 15 -4 1601.31 522.825 1
 3 -15 -4 1524.41 381.295 8
 -3 15 -2 8221.01 1288.88 1
 3 -15 -2 11149.7 2178.98 2
 -3 -15 -2 11015.8 1876.8 2
 -3 -15 -2 7688.59 574.281 5
 3 15 -2 7759.72 1267.19 1
 3 -15 0 1172.17 767.435 2
 3 15 0 558.415 345.707 1
 -3 15 0 491.076 445.296 1
 -3 -15 0 388.269 494.967 2
 -3 -15 0 636.452 193.987 5
 -3 15 0 459.367 435.918 7
 3 15 0 374.197 152.587 7
 3 -15 0 -229.959 829.81 6
 3 15 2 6360.03 785.6 7
 3 15 2 10002.8 1457.27 1
 -3 -15 2 9547.55 1719.66 2
 3 -15 2 9730.42 2024.81 6
 -3 -15 2 10447.1 2206.27 6
 -3 -15 2 7566.74 747.086 5
 -3 15 2 8287 1310.27 1
 3 15 4 1768.1 595.011 1
 3 -15 4 1769.05 870.576 6
 -3 15 4 1336.01 484.945 1
 -3 -15 4 2554.79 1040.06 6
 3 -15 6 4473.55 1087.76 6
 -3 -15 6 6622.7 1552.02 6
 3 15 6 5239.08 1071.77 1
 -3 15 6 5635.53 1070.89 1
 3 -15 8 19301.7 2241.77 6
 3 15 8 24992.4 2363.1 1
 -3 -15 8 20334.3 2511.87 6
 -3 15 8 26008.6 2381.32 1
 -3 15 10 16757.7 1955.94 1
 3 15 10 14553.8 1875.96 1
 3 -15 10 13892.1 1872.59 6
 -3 -15 10 13389.7 1957.1 6
 3 15 12 2939.88 887.925 1
 -3 -15 12 3184.7 1057.38 6
 3 -15 12 2126.78 785.268 6
 -3 15 12 3870.28 988.623 1
 3 15 12 3029.96 908.199 4
 3 15 14 3658.2 940.101 1
 3 -15 14 5656.69 1219.71 6
 -3 15 14 4091.24 1055.22 1
 3 15 14 4455.95 1218.22 4
 -3 -15 14 5125.74 1307.72 6
 3 15 16 3357.44 948.109 1
 3 -15 16 4772 1173.19 6
 3 15 16 4980.19 1371.39 4
 -3 -15 16 4097.79 1187.45 6
 -3 15 16 3795.56 991.659 1
 -3 -15 18 1311.61 702.179 6
 3 -15 18 1432 755.799 6
 3 15 18 307.489 337.259 4
 -3 15 18 -309.215 471.368 1
 -3 15 18 576.772 266.263 4
 -3 16 -19 754.277 541.956 3
 3 16 -19 861.677 601.889 3
 3 16 -19 144.801 342.808 5
 -3 16 -19 1029.42 599.139 5
 3 16 -17 2023.11 873.591 3
 3 -16 -17 279.061 320.893 2
 -3 -16 -17 1040.37 626.032 2
 3 16 -17 2249.28 851.535 5
 -3 16 -17 1853.48 692.583 3
 -3 16 -17 1774.53 910.061 5
 3 -16 -15 640.846 339.975 2
 3 16 -15 1865.16 742.577 3
 3 16 -15 984.713 468.525 5
 -3 16 -15 2142.87 858.878 3
 -3 16 -15 2624.31 820.527 5
 -3 -16 -15 2149.12 1001.38 2
 3 16 -13 -53.9625 460.302 3
 -3 -16 -13 544.642 350.846 2
 3 16 -13 922.593 544.188 5
 3 -16 -13 -38.6229 498.745 2
 -3 16 -13 223.464 246.983 3
 3 16 -11 7871.24 1291.54 5
 -3 16 -11 5398.94 944.636 5
 3 -16 -11 2851.19 1065.52 2
 -3 -16 -11 4957.34 1282.85 2
 -3 16 -11 7074.85 1516.79 3
 3 16 -11 6640.72 1462.86 3
 -3 16 -11 5353.43 1048.94 1
 -3 16 -9 14172.2 1435.84 5
 -3 -16 -9 11744.3 2057.45 2
 -3 16 -9 13487.7 2134.55 3
 3 16 -9 12862.7 1941.37 3
 3 16 -9 16071.7 1734.17 5
 3 -16 -9 9414.71 1978.91 2
 -3 16 -9 14843.5 1839.52 1
 3 -16 -7 5121.4 1560.84 2
 -3 -16 -7 4377.32 1272.44 2
 -3 16 -7 8551.77 1788.79 3
 -3 16 -7 6664.17 913.844 5
 -3 16 -7 8569.26 1376.48 1
 3 16 -7 5078.19 1254.41 3
 -3 -16 -5 2443.73 874.564 2
 -3 16 -5 2744.91 554.847 5
 -3 -16 -5 2315.34 570.645 8
 3 -16 -5 2086.1 969.972 2
 3 16 -5 1987.36 755.655 3
 3 16 -5 2333.09 755.686 1
 -3 16 -5 4071.45 1004.7 1
 -3 -16 -3 1916.35 669.211 2
 3 16 -3 1895.43 562.367 1
 -3 16 -1 6748.93 1220.86 1
 -3 -16 -1 5897.21 1357.42 2
 3 -16 -1 8493.85 1883.02 2
 3 16 -1 6180.89 1162.07 1
 3 16 1 4135.52 947.474 1
 3 -16 1 7815.73 2004.27 6
 -3 16 1 5297.38 1020.56 1
 3 -16 1 5539.04 1505.22 2
 -3 -16 1 4411.72 1288.57 2
 -3 16 3 5405.65 1233.61 1
 -3 -16 3 2746.51 955.297 2
 -3 -16 3 1786.99 884.562 6
 3 16 3 2200.99 758.599 1
 3 -16 3 2496.95 917.562 6
 -3 16 5 4513.01 1045.55 1
 3 16 5 1523.54 483.938 1
 -3 -16 5 2591.23 981.582 6
 3 -16 5 2290.92 862.43 6
 -3 -16 7 3059.04 1053.46 6
 -3 16 7 4752.52 1157.28 1
 3 16 7 6721.61 1313.86 1
 3 -16 7 4595.17 1113.9 6
 -3 16 9 17028.2 2025.78 1
 3 16 9 16099.2 1971.81 1
 3 -16 9 12611.2 1877.37 6
 -3 -16 9 14213.1 2140.79 6
 3 -16 11 4698.08 1096.81 6
 -3 16 11 7053.3 1345.56 1
 3 16 11 5756.61 1214.1 1
 -3 -16 11 3532.07 1040.33 6
 3 -16 13 824.632 641.196 6
 3 16 13 958.262 594.948 4
 -3 16 13 1372.74 795.168 1
 3 16 13 736.664 510.759 1
 -3 -16 13 282.03 514.213 6
 3 16 15 1462.52 604.979 1
 -3 -16 15 1829.55 665.033 6
 3 16 15 1270.38 702.937 4
 -3 16 15 2010.24 747.1 1
 3 -16 15 1079.68 611.571 6
 -3 16 17 1232.24 760.456 4
 3 -16 17 1547.76 740.476 6
 3 16 17 1100.54 569.821 1
 -3 -16 17 2689.94 1002.23 6
 -3 16 17 2170.25 856.519 1
 3 16 17 639.042 628.927 4
 3 17 -18 430.052 578.382 3
 -3 17 -18 545.133 392.585 5
 -3 17 -18 993.996 568.386 3
 3 17 -18 1229.4 745.11 5
 3 17 -16 2525.28 945.359 3
 3 -17 -16 2748.46 1174.51 2
 3 17 -16 4069.96 1172.76 5
 -3 17 -16 1771.06 806.063 3
 -3 -17 -16 3123.84 1218.93 2
 -3 17 -16 3347.82 918.643 5
 -3 17 -14 5046.4 1299.17 3
 3 17 -14 7372.53 1390.05 5
 3 17 -14 5690.36 1409.1 3
 -3 -17 -14 3189.65 1165.28 2
 3 -17 -14 3976.34 1249.89 2
 -3 17 -14 6750.32 1263.38 5
 -3 17 -12 4370.95 1313.71 3
 3 -17 -12 2171.88 928.254 2
 3 17 -12 3986.46 1127.16 3
 -3 17 -12 5082.11 1002.29 5
 3 17 -12 5092.32 1084.98 5
 -3 -17 -12 2739.71 935.118 2
 3 -17 -10 1078.44 687.785 2
 -3 17 -10 1653.82 555.606 5
 -3 17 -10 1840.79 767.578 3
 3 17 -10 1524.27 676.18 3
 -3 17 -10 1325.87 622.713 1
 -3 -17 -10 1736.76 873.34 2
 3 17 -10 2303.16 670.366 5
 3 -17 -8 1456.28 852.889 2
 -3 -17 -8 2256.39 917.534 2
 -3 17 -8 2111.87 544.162 5
 -3 17 -8 3123.24 936.883 1
 3 17 -8 3805.14 1151.93 3
 -3 17 -8 2912.79 1123.25 3
 -3 -17 -6 2074.74 838.155 2
 3 17 -6 1139.52 637.794 1
 3 -17 -6 1357.37 954.008 2
 -3 17 -6 275.586 282.864 1
 3 17 -6 1679.65 887.699 3
 -3 17 -6 823.52 297.183 5
 -3 -17 -6 1710.16 490.358 8
 3 17 -4 6511.18 1204.36 1
 3 17 -4 7464.2 1409.15 3
 -3 17 -4 7201.11 1307.45 1
 3 -17 -4 10535.8 2194.57 2
 -3 -17 -4 10158 1877.66 2
 -3 17 -2 3520.65 887.605 1
 -3 -17 -2 3146.46 999.982 2
 3 -17 -2 5370.75 1592.88 2
 3 17 -2 3851.88 1031.26 1
 -3 17 0 3715.5 959.758 1
 3 -17 0 6281.62 1603.17 2
 -3 -17 0 3722.43 1279.61 2
 3 17 0 4919.3 1059.42 1
 3 17 2 3221.17 858.001 1
 -3 17 2 3089.92 817.639 1
 -3 -17 2 4965.75 1655.95 6
 3 -17 2 2824.1 1076.47 6
 -3 -17 2 3203.03 1094.71 2
 -3 -17 4 7321.4 1792.49 6
 -3 17 4 7453.49 1319.73 1
 3 -17 4 7571.54 1642.63 6
 3 17 4 7474.5 1359.23 1
 3 -17 6 795.107 387.187 6
 3 17 6 2583.96 845.47 1
 -3 17 6 1243.02 605.524 1
 -3 -17 6 1967.83 764.168 6
 -3 17 8 3188.23 902.439 1
 3 -17 8 2212.69 804.416 6
 3 17 8 5237.38 1175.91 1
 -3 -17 8 3107.09 1092.01 6
 -3 17 10 2712.88 829.536 1
 3 -17 10 1390.18 621.427 6
 -3 -17 10 2210.01 979.964 6
 3 17 10 2411.55 771.423 1
 -3 17 12 5086.39 1202.81 1
 3 -17 12 4777.81 1239.04 6
 3 17 12 4160.54 1220.75 4
 3 17 12 6134.63 1332.81 1
 -3 -17 12 3678.17 1119.97 6
 3 -17 14 5539.29 1341.98 6
 3 17 14 6326.3 1557.23 4
 -3 17 14 6309.69 1374.79 1
 -3 -17 14 5974.15 1437.19 6
 3 17 14 5378.77 1242.97 1
 3 17 16 3168.55 1074.77 4
 -3 -17 16 3631.96 1172.9 6
 3 -17 16 2120.4 887.384 6
 -3 17 16 4564.4 1184.44 1
 3 17 16 3774.42 1134.48 1
 -3 17 18 894.852 628.365 1
 -3 18 -19 -390.378 356.339 3
 -3 18 -19 -407.446 532.105 5
 3 18 -17 1148.99 607.77 3
 3 18 -17 653.751 544.239 5
 -3 18 -17 411.39 410.06 5
 -3 18 -17 908.862 379.907 3
 -3 18 -15 -318.349 710.361 3
 3 -18 -15 -493.336 933.021 2
 -3 18 -15 738.141 496.572 5
 -3 -18 -15 -1426.12 828.562 2
 3 18 -15 350.584 394.372 5
 3 18 -15 325.737 351.72 3
 -3 18 -13 4853.41 1386.08 3
 3 -18 -13 1278.08 896.951 2
 -3 18 -13 2845.05 771.053 5
 3 18 -13 4132.08 1016.67 5
 3 18 -13 2594.9 938.539 3
 -3 -18 -13 3480.18 1226.84 2
 -3 -18 -11 93.7582 408.007 2
 3 18 -11 363.217 498.862 3
 -3 18 -11 182.131 347.456 1
 3 -18 -11 1248.22 830.173 2
 -3 18 -11 1048.36 761.116 3
 -3 18 -11 190.91 289.379 5
 -3 18 -9 3955.42 1303.5 3
 3 -18 -9 2040.54 1105.56 2
 3 18 -9 2448.37 848.467 3
 -3 18 -9 2744.81 851.544 1
 -3 -18 -9 1613.42 695.68 2
 -3 18 -7 2316.42 772.633 1
 -3 18 -7 2864.43 1054.27 3
 3 -18 -7 2278.64 1038.56 2
 3 18 -7 281.903 283.131 3
 -3 -18 -7 1961.96 870.456 2
 -3 18 -5 6229.85 1278.89 1
 -3 -18 -5 11824.8 2132.07 2
 3 -18 -5 8363.45 1976.45 2
 3 18 -5 7434.11 1447.35 1
 3 18 -5 11176 1895.94 3
 -3 -18 -5 7734.19 1092.82 8
 3 18 -3 6499.16 1244.77 1
 3 -18 -3 5106.65 1580.07 2
 -3 18 -3 5062.4 1150.79 1
 3 18 -3 4796.03 1221.07 3
 -3 -18 -3 4503.27 1347.07 2
 3 -18 -1 5312.51 1480.76 2
 -3 18 -1 4131.91 1045.64 1
 3 18 -1 2823.03 909.181 1
 -3 -18 -1 4145.15 1272.64 2
 -3 -18 1 3350.25 1118.36 2
 3 18 1 3029.85 885.843 1
 3 -18 1 2620.98 1094.29 2
 -3 18 1 3857.17 1015.23 1
 3 18 3 4829.16 1161.16 1
 -3 -18 3 4682.9 1468.05 6
 3 -18 3 7031.52 1723.24 6
 -3 18 3 4611.06 1129.27 1
 -3 -18 3 5968.58 1395.76 2
 -3 -18 5 8146.81 1891.14 6
 3 18 5 7707.96 1455.09 1
 -3 18 5 9738.18 1536.06 1
 3 -18 5 9352.28 1854 6
 3 -18 7 2145.81 731.814 6
 -3 -18 7 794.006 554.893 6
 -3 18 7 2099.16 832.984 1
 3 18 7 1296.88 574.104 1
 3 18 9 1910.27 666.408 1
 3 -18 9 1465.68 630.804 6
 -3 18 9 2635.11 821.846 1
 -3 -18 9 2432.32 970.743 6
 3 -18 11 342.058 498.404 6
 -3 -18 11 519.923 493.119 6
 3 18 11 -156.292 343.148 1
 -3 18 11 244.12 352.485 1
 3 18 13 4086.45 1139.05 1
 3 18 13 3689.62 1143.6 4
 -3 -18 13 2642.47 985.572 6
 -3 18 13 4516.58 1209.48 1
 3 -18 13 3237.55 1116.34 6
 3 18 15 500.958 395.448 1
 -3 18 15 713.303 475.115 1
 3 18 15 187.514 470.533 4
 -3 -18 15 5.53108 374.628 6
 3 -18 15 -161.488 311.094 6
 -3 18 17 1216.44 676.54 1
 3 18 17 1484.86 722.126 1
 -3 19 -18 847.387 736.175 3
 3 19 -16 1458.72 672.306 5
 -3 19 -16 27.929 305.303 3
 3 19 -16 1124.2 725.103 3
 3 19 -14 175.585 205.516 5
 -3 -19 -14 -5.58483 236.181 2
 -3 19 -14 -580.43 719.715 3
 3 19 -14 250.05 271.418 3
 3 -19 -14 -518.403 939.716 2
 3 -19 -12 5953.67 1766.7 2
 -3 -19 -12 6247.41 1623.14 2
 -3 19 -12 8827.6 1933.42 3
 3 19 -12 11010.3 2083.58 3
 -3 -19 -10 10265.2 2080.53 2
 -3 19 -10 13116.9 1918.25 1
 3 19 -10 15203.4 2341.15 3
 3 -19 -10 8951.25 2095.97 2
 -3 19 -10 13405.9 2351.22 3
 3 -19 -8 5820.16 1728.76 2
 3 19 -8 5738.85 1444.36 3
 -3 -19 -8 5256.55 1446.06 2
 -3 19 -8 5972.6 1364.67 1
 -3 19 -8 6030.23 1602.48 3
 3 -19 -6 28400.7 3685.15 2
 -3 19 -6 26419.2 2717.82 1
 3 19 -6 22669.8 2540.37 1
 3 19 -6 25506.3 2965.06 3
 -3 -19 -6 22373.8 2994.85 2
 3 -19 -4 9873.61 2192.09 2
 -3 19 -4 6985.82 1425.19 1
 3 19 -4 6934.27 1592.28 3
 3 19 -4 5312.6 1267.21 1
 -3 -19 -4 7658.06 1762.57 2
 -3 -19 -2 3684.54 1210.98 2
 -3 19 -2 3019.06 962.006 1
 3 -19 -2 3904.68 1335.49 2
 3 19 -2 2342.92 858.821 1
 3 19 0 1312.24 636.592 1
 3 -19 0 2052.87 1033.63 2
 -3 19 0 920.408 408.33 1
 -3 -19 0 1605.57 875.771 2
 3 19 2 3410.17 979.031 1
 3 -19 2 3457.49 1230.6 6
 -3 -19 2 4224.41 1234.45 2
 -3 19 2 4004.85 1031.43 1
 3 -19 2 5980.66 1503.41 2
 -3 19 4 5714.08 1245.76 1
 3 -19 4 5990.18 1592.78 6
 3 19 4 5417.69 1252.63 1
 -3 -19 4 3859.15 1276.45 6
 -3 -19 4 7218.47 1548.24 2
 -3 19 6 22658.5 2540.52 1
 3 -19 6 22127 2946.61 6
 3 19 6 21188.9 2497.26 1
 -3 -19 6 20563.3 2999.5 6
 -3 -19 8 4735.18 1351.73 6
 -3 19 8 4949.57 1291.36 1
 3 19 8 6119.79 1378.84 1
 3 -19 8 4648.51 1303.22 6
 3 -19 10 8519.65 1669.48 6
 -3 19 10 16117.5 2200.52 1
 -3 -19 10 10536.6 2091.6 6
 3 19 10 11367.5 1866.72 1
 -3 19 12 12856 2016.5 1
 3 19 12 13467.6 2210.3 4
 -3 -19 12 12320.8 2226.01 6
 3 19 12 10464.3 1872.41 1
 3 -19 12 11264.1 1978.38 6
 3 19 14 337.686 418.579 4
 3 19 14 66.905 270.557 1
 3 -19 14 611.791 506.72 6
 -3 19 14 1121.5 706.16 1
 -3 -19 14 -509.903 729.914 6
 -3 19 16 2534.1 961.096 1
 3 19 16 2066.96 818.352 1
 -3 19 18 3128.06 1059.05 1
 -3 20 -15 -472.02 508.683 3
 -3 -20 -13 451.736 374.949 2
 3 -20 -13 348 406.55 2
 -3 20 -13 248.645 376.358 3
 3 -20 -11 10283.3 2332.37 2
 -3 20 -11 14041.9 2452.92 3
 3 20 -11 14653.1 2418.61 3
 -3 -20 -11 8482.03 2017.33 2
 3 -20 -9 2230.17 1245.68 2
 -3 20 -9 6334.36 1409.77 1
 -3 20 -9 7019.89 1732.49 3
 3 20 -9 4586.1 1382.89 3
 -3 -20 -9 3241.19 1208.9 2
 -3 -20 -7 7784.75 1821.8 2
 -3 20 -7 7347.65 1530.44 1
 3 -20 -7 6926.62 1911.65 2
 3 20 -7 8097.99 1715.86 3
 -3 20 -7 8797.68 1984.44 3
 -3 -20 -5 13622.1 2343.36 2
 3 20 -5 8470.1 1652.25 1
 -3 20 -5 10828.9 1757.52 1
 3 20 -5 10264.5 1971.14 3
 3 -20 -5 12316.5 2428.58 2
 -3 20 -3 9886 1679.21 1
 3 -20 -3 11293.6 2292.3 2
 -3 -20 -3 9890.39 2029.55 2
 3 20 -3 8400.12 1632.84 1
 3 20 -3 11373.3 2009.82 3
 3 20 -1 10239.9 1766.58 1
 -3 20 -1 10906.6 1789.98 1
 -3 -20 -1 14250.8 2344 2
 3 -20 -1 14339.1 2600.59 2
 -3 -20 1 12403.6 2187.51 2
 3 -20 1 11530.8 2150.9 2
 -3 20 1 11045 1786.65 1
 3 20 1 8662.73 1610.82 1
 3 20 3 9982.45 1730.13 1
 -3 20 3 9877.84 1699.47 1
 3 -20 3 11708.5 2144.63 2
 -3 -20 3 8859.8 1814.09 2
 3 -20 3 8609.78 2068.1 6
 -3 -20 5 9494.39 2150.94 6
 3 20 5 9653.49 1773.64 1
 3 -20 5 6833.49 1747.09 6
 -3 20 5 8104.97 1536.12 1
 -3 -20 5 10859.4 1954.77 2
 3 -20 7 6266.58 1481.65 6
 3 20 7 6042.03 1356.91 1
 -3 20 7 6299.46 1382.27 1
 -3 -20 7 6346.01 1661.64 6
 -3 20 9 5011.85 1300.77 1
 -3 -20 9 3645.57 1230.81 6
 3 20 9 4638.64 1278.53 1
 3 -20 9 2539.48 983.21 6
 3 20 11 14429.1 2203.69 1
 -3 -20 11 9002.07 1982.08 6
 3 -20 11 9562.58 1879.83 6
 -3 20 11 12089.5 2019.66 1
 3 -20 13 218.122 333.443 6
 -3 20 13 671.08 460.27 1
 3 20 13 161.941 388.747 4
 3 20 13 521.415 491.628 1
 -3 -20 13 1345.44 770.323 6
 -3 20 15 324.396 301.566 1
 3 20 15 269.321 305.786 1
 3 20 17 154.432 303.94 1
 -3 21 -14 490.435 746.253 3
 3 -21 -12 2990.77 1286.36 2
 3 21 -12 4960.58 1484.68 3
 -3 21 -12 2693.26 1158.33 3
 -3 -21 -12 5256.03 1640.56 2
 -3 21 -10 11900.1 1971.81 1
 3 21 -10 14250.6 2396.92 3
 -3 21 -10 18300 2896.12 3
 3 -21 -10 9279.7 2190.41 2
 -3 -21 -10 12950.1 2506.64 2
 -3 -21 -8 269.98 329.259 2
 -3 21 -8 1110.38 839.371 3
 3 -21 -8 1430.74 966.922 2
 -3 21 -8 1947.31 849.723 1
 3 21 -8 228.34 409.96 3
 3 -21 -6 15122.9 2801.46 2
 -3 21 -6 14805.4 2552.23 3
 -3 -21 -6 15975.8 2650.31 2
 3 21 -6 12275.3 2219.44 3
 -3 21 -6 14216.4 2133.23 1
 3 21 -4 2803.36 1039.29 1
 3 -21 -4 4209.47 1330.11 2
 -3 21 -4 1909.03 814.499 1
 3 21 -4 4216.56 1397.28 3
 -3 -21 -4 4391.45 1464.5 2
 3 21 -2 2019.71 716.676 1
 -3 -21 -2 3626.63 1293.56 2
 3 21 -2 3144.85 1221.33 3
 -3 21 -2 2580.16 899.593 1
 3 -21 -2 3342.33 1225.53 2
 -3 -21 0 -456.307 362.319 2
 -3 21 0 320.425 493.07 1
 3 21 0 743.464 574.205 1
 3 -21 0 275.935 519.213 2
 -3 -21 2 2072.72 881.244 2
 3 -21 2 1752.01 944.014 2
 3 21 2 3067.45 996.398 1
 -3 21 2 1623.88 815.332 1
 -3 -21 4 3076.01 1006.3 6
 3 -21 4 3864.65 1270.35 2
 3 21 4 3281.45 1070.95 1
 -3 -21 4 3349.03 1171.9 2
 3 -21 4 2421.71 1098.49 6
 -3 21 4 3764.24 1131.1 1
 3 21 6 10818.6 1933.52 1
 -3 -21 6 10393.8 2208.23 6
 3 -21 6 10041.8 2135.63 6
 -3 -21 6 10397.7 1950.71 2
 -3 21 6 11685.5 1921.05 1
 3 -21 8 -101.573 567.66 6
 -3 21 8 1689.58 993.784 1
 3 21 8 463.689 453.667 1
 -3 -21 8 539.615 376.272 6
 -3 -21 10 10015.6 2181.2 6
 3 21 10 14303.2 2254.96 1
 3 -21 10 11302.6 2139.86 6
 -3 21 10 13178.2 2129.76 1
 -3 -21 12 4499.36 1482.6 6
 3 -21 12 1818.84 728.108 6
 3 21 12 3194.79 986.404 1
 3 21 12 4573.98 1311.74 4
 -3 21 12 6704.63 1565.08 1
 -3 21 14 483.362 602.071 1
 3 21 14 428.802 553.668 1
 -3 22 -11 1660.4 941.715 3
 3 22 -11 448.977 753.736 3
 -3 -22 -9 951.351 656.865 2
 -3 22 -9 1207.3 552.269 1
 3 22 -9 243.651 348.401 3
 3 -22 -9 654.071 772.933 2
 -3 -22 -7 483.754 589.57 2
 -3 22 -7 211.126 281.962 1
 3 -22 -7 58.9973 669.631 2
 3 22 -7 454.982 394.084 3
 -3 22 -7 -722.885 691.358 3
 -3 22 -5 1514.81 707.402 1
 3 22 -5 2838.61 1118.66 3
 3 -22 -5 3684.76 1377.29 2
 3 22 -5 1864.71 857.928 1
 -3 -22 -5 3866.4 1386.51 2
 -3 22 -3 -70.5694 449.218 1
 3 -22 -3 -1014.32 740.071 2
 3 22 -3 -320.953 327.807 3
 3 22 -3 326.613 357.282 1
 -3 -22 -1 1741.01 992.747 2
 -3 22 -1 1112.09 636.555 1
 3 -22 -1 1905.75 967.256 2
 3 22 -1 1023.18 618.289 1
 3 22 1 1414.56 743.134 1
 -3 22 1 832.874 546.07 1
 -3 -22 1 1110.14 691.568 2
 3 -22 1 1601.92 940.885 2
 -3 -22 3 347.762 250.272 2
 3 22 3 -300.545 291.574 1
 3 -22 3 -531.292 633.761 2
 -3 22 3 -361.886 582.687 1
 -3 -22 5 1205.54 739.028 2
 3 -22 5 1820.13 986.616 6
 -3 -22 5 2902.1 1253.07 6
 3 22 5 2377.68 983.764 1
 3 -22 5 2289.71 918.667 2
 -3 22 5 1272.02 688.564 1
 3 -22 7 478.589 535.405 6
 -3 -22 7 -126.078 408.009 6
 -3 -22 7 125.007 368.296 2
 3 22 7 -276.607 578.365 1
 -3 22 7 -293.769 392.266 1
 -3 22 9 2396.94 1012.57 1
 3 22 9 1285.87 622.055 1
 3 -22 9 1521.06 803.906 6
 -3 -22 9 622.836 596.344 6
 3 22 11 -295.014 537.339 4
 3 22 11 670.151 462.212 1
 -3 22 11 301.249 585.877 1
 3 -23 -8 1348.04 950.753 2
 -3 23 -8 2497.41 1102.21 1
 3 23 -8 1652.07 857.802 3
 -3 -23 -8 912.921 678.183 2
 3 23 -6 12250 2303.91 3
 -3 23 -6 9829.47 2243.26 3
 -3 -23 -6 7476.03 1864.78 2
 3 -23 -6 8655.75 2159.48 2
 -3 23 -6 8671.76 1816.36 1
 3 -23 -4 -338.132 469.814 2
 -3 -23 -4 977.072 789.094 2
 -3 23 -4 1248.16 809.627 1
 3 23 -4 123.866 471.497 3
 3 23 -4 405.412 539.186 1
 3 23 -2 5248 1439.68 1
 -3 23 -2 1882.25 884.31 1
 3 23 -2 4355.46 1354.83 3
 3 -23 -2 4851.5 1527.27 2
 -3 -23 -2 5281.57 1510.69 2
 3 23 0 1557.52 737.988 1
 -3 -23 0 2732.38 1140.11 2
 3 -23 0 2582.92 1111.85 2
 -3 23 0 3995.02 1274.6 1
 -3 23 2 2934.86 1046.78 1
 3 23 2 3817.92 1204.85 1
 -3 -23 2 4602.72 1350.88 2
 3 -23 2 4653.6 1437.95 2
 3 23 4 698.606 474.118 1
 3 -23 4 1351.59 924.885 6
 -3 -23 4 356.123 457.849 2
 3 -23 4 -168.099 641.554 2
 -3 23 4 1392.37 936.242 1
 -3 -23 6 7612.24 2032.08 6
 -3 23 6 7445.08 1655 1
 3 23 6 6507.69 1553.32 1
 3 -23 6 6283.74 1653.61 6
 -3 -23 6 7847.24 1731.96 2
 3 23 8 1366.77 717.943 1
 -3 -23 8 1754.39 1058.31 6
 3 -23 8 693.716 424.066 6
 -3 23 8 3565.46 1265.78 1
 -3 -23 8 1241.81 638.723 2
 -3 24 -9 -500.678 502.882 1
 -3 24 -7 2292.39 842.791 1
 -3 -24 -5 498.615 374.528 2
 3 24 -5 1789.05 891.278 3
 -3 24 -5 2036.88 839.564 1
 -3 24 -5 2727.55 1178.18 3
 3 -24 -3 1263.82 846.639 2
 3 24 -3 1241.34 800.15 1
 -3 -24 -3 1441.01 831.47 2
 3 24 -3 1000.12 534.581 3
 -3 24 -3 695.841 695.232 1
 3 -24 -1 2323.67 1009.13 2
 -3 -24 -1 2098.34 1072.2 2
 -3 24 -1 2021.26 911.287 1
 3 24 -1 841.828 459.314 1
 3 24 -1 4362.68 1380.25 3
 -3 -24 1 2833.05 1104.8 2
 3 24 1 1521.55 866.749 1
 3 -24 1 1292.57 700.497 2
 -3 24 1 1159.87 625.951 1
 -3 24 3 474.75 434.531 1
 3 -24 3 870.356 505.975 2
 3 24 3 761.212 501.659 1
 3 24 5 1726.29 936.454 1
 3 -24 5 1999.51 1049.94 6
 -3 -24 5 2042.83 919.403 2
 3 -24 5 1867.15 919.566 2
 -3 24 5 595.799 338.258 1
 3 -24 7 1992.97 972.05 6
 -3 -24 7 1065.71 679.541 2
 -3 25 -8 1302.07 570.799 1
 -3 25 -6 4113.73 1332.78 1
 -3 25 -4 -955.818 811.077 1
 3 25 -2 5322.65 1446.88 1
 -3 25 -2 2425.26 1026.71 1
 -3 25 0 2514.5 1115.4 1
 -3 -25 0 4724.34 1448.13 2
 -3 -25 2 6405.12 1711.97 2
 -4 0 -22 2126.1 988.795 5
 4 0 -22 1237.41 452.344 5
 4 0 -20 6582.23 1352.33 5
 -4 0 -20 6852.06 1432.57 5
 4 0 -18 10612.9 1239.16 3
 4 0 -18 10044 1519.97 5
 -4 0 -18 8855.73 1508.36 5
 4 0 -16 153.46 245.232 3
 -4 0 -16 -87.6404 377.979 5
 4 0 -16 430.523 232.505 5
 -4 0 -14 27431.1 1380.68 3
 -4 0 -14 25625.2 2208.39 5
 4 0 -14 29714.3 2289.43 5
 4 0 -14 26082.4 1771.04 3
 4 0 -12 2506.61 467.711 3
 -4 0 -12 3139.95 728.729 5
 -4 0 -12 2217.53 348.099 3
 4 0 -12 3076.59 719.954 5
 -4 0 -10 1721.15 260.089 3
 4 0 -10 2432.34 566.481 5
 -4 0 -10 2051.43 542.287 5
 4 0 -10 1750.94 368.35 3
 4 0 -8 19869.9 1179.11 3
 4 0 -8 19888 1461.99 7
 -4 0 -8 18930.1 766.187 3
 4 0 -8 20405.4 1416.43 5
 -4 0 -8 21163.7 1495.19 5
 -4 0 -8 19788.9 610.86 1
 4 0 -6 34506.1 1244.86 2
 4 0 -6 35492.7 1716.29 7
 -4 0 -6 33945.1 802.888 3
 -4 0 -6 35007.2 1732.15 5
 4 0 -6 33878.2 1400.32 3
 -4 0 -6 37647.2 1695.16 4
 4 0 -6 34155.9 1604.19 5
 -4 0 -6 33905.4 961.737 1
 4 0 -4 824.841 228.517 7
 4 0 -4 783.703 150.285 2
 4 0 -4 470.966 177.308 3
 -4 0 -4 712.705 188.272 4
 -4 0 -4 986.464 239.898 8
 4 0 -4 1026.76 277.446 5
 -4 0 -4 922.906 308.118 5
 -4 0 -2 68143.9 1569.24 8
 4 0 -2 70257.8 1478.34 3
 -4 0 -2 67130.4 1546.65 4
 4 0 -2 67806.2 1984.1 7
 4 0 2 69335.9 1521.49 8
 -4 0 2 71137.8 1488.15 3
 -4 0 2 71045.6 2130.34 5
 4 0 2 72222.2 1556.5 4
 -4 0 2 67674.4 1959.74 7
 -4 0 2 70638.9 1571.81 8
 -4 0 2 69966.4 1028.04 6
 4 0 2 69166.2 1338.73 2
 -4 0 4 857.181 235.733 5
 -4 0 4 977.133 168.605 2
 4 0 4 1183.5 236.42 8
 -4 0 4 939.353 219.957 3
 -4 0 4 917.383 244.499 7
 4 0 4 1138.85 255.646 4
 4 0 4 812.106 190.953 2
 -4 0 6 37784.1 1304.15 2
 -4 0 6 39419.7 1505.4 3
 -4 0 6 34820.4 1633.6 5
 4 0 6 38708.5 1619.35 4
 4 0 6 38438.4 1521.61 2
 4 0 6 34546.6 861.558 3
 4 0 6 35986.4 1416.18 8
 -4 0 6 39136.1 1727.18 7
 -4 0 8 17989.3 1207.06 4
 -4 0 8 19694 1109.84 2
 4 0 8 17802.9 778.095 3
 4 0 8 18053.2 1132.24 8
 4 0 8 17427.1 1249.14 4
 -4 0 10 2035.02 330.538 1
 -4 0 10 1683.94 402.794 4
 4 0 10 1817.85 286.954 3
 4 0 10 1512.92 414.298 4
 -4 0 12 2500.86 528.564 4
 4 0 12 2946.53 622.947 4
 4 0 12 2666.08 400.293 3
 -4 0 12 2677.39 416.518 1
 4 0 14 24622.6 1398.55 3
 4 0 14 28299.4 2033.34 4
 -4 0 14 25958.9 1849.06 4
 -4 0 14 25592.4 1337.31 1
 -4 0 16 226.279 303.772 4
 -4 0 16 169.805 92.1704 1
 4 0 16 -15.8834 238.175 4
 -4 0 18 9061.36 1209.7 4
 4 0 18 9988.69 1391.71 4
 4 0 20 7279.14 1245.45 4
 -4 0 20 6245.29 1104.99 4
 4 0 22 2116.25 670.732 4
 -4 0 22 2932.71 803.305 4
 4 0 24 1643.98 733.429 4
 -4 0 24 1681.59 678.248 6
 4 -1 -23 1575.61 773.6 5
 -4 -1 -23 1459.05 657.568 5
 -4 1 -23 1726.03 811.424 5
 4 1 -23 1625.71 793.372 5
 -4 -1 -21 815.973 580.322 5
 -4 1 -21 1304.76 799.043 5
 4 1 -21 877.013 376.599 5
 4 1 -21 1583.83 633.878 3
 4 -1 -21 1221.49 523.19 5
 4 -1 -19 151.166 229.294 5
 4 1 -19 442.005 365.531 5
 -4 -1 -19 808.452 567.721 5
 -4 1 -19 204.656 355.459 5
 4 1 -19 355.77 290.533 3
 -4 1 -17 4038.27 964.616 5
 4 1 -17 3452.3 702.544 3
 4 1 -17 4047.67 926.526 5
 4 -1 -17 2748.18 783.846 5
 -4 -1 -17 2611.9 807.151 5
 -4 1 -17 3156.93 537.819 3
 4 1 -15 17608.6 1511.05 3
 4 -1 -15 18546.1 1886.75 5
 -4 -1 -15 19553.1 2021.35 5
 -4 1 -15 18715.5 1968.17 5
 -4 1 -15 17085.7 1170.85 3
 4 -1 -15 18026.2 1483.23 3
 4 1 -15 19554.9 1950.82 5
 4 1 -13 22295.6 1573.96 3
 -4 1 -13 19906.4 1143.9 3
 4 -1 -13 20139.7 1809.97 5
 -4 1 -13 23609.8 2043.53 5
 4 -1 -13 22283.1 1543.02 3
 -4 -1 -13 21949.9 1974.82 5
 4 1 -13 22993.1 1970.93 5
 -4 -1 -11 10416.9 542.431 1
 -4 -1 -11 12279.7 1364.12 5
 4 -1 -11 11133.8 1030.55 2
 4 -1 -11 10827.6 1000.21 3
 4 1 -11 10389.1 1215.78 5
 4 1 -11 10930.3 1009.99 3
 4 -1 -11 10025.8 1166.78 5
 -4 1 -11 12564.2 1432.56 5
 -4 1 -11 9549.02 724.414 3
 -4 -1 -9 11923.4 1206.1 5
 -4 1 -9 13035.4 729.174 3
 4 -1 -9 12162.7 947.397 2
 4 1 -9 11225.8 1130.24 5
 -4 -1 -9 12073.7 622.627 1
 -4 1 -9 13130.8 1298.08 5
 4 1 -9 11752.3 975.209 3
 -4 -1 -9 13335.3 1118.98 2
 4 -1 -9 12329.3 991.97 3
 4 1 -9 13017 1228.51 7
 4 -1 -9 13116.3 1281.96 7
 4 -1 -9 12822.8 1193.17 5
 -4 -1 -7 19410 1364.9 5
 4 -1 -7 19370.2 1401.22 7
 -4 1 -7 19814.4 1403.53 5
 4 1 -7 17058 1056.84 3
 -4 -1 -7 17919.9 1288.87 4
 -4 -1 -7 17995.4 785.31 1
 -4 1 -7 18036 1247.09 4
 4 1 -7 18370.5 1293.37 7
 -4 -1 -7 19546.8 1203.59 2
 4 -1 -7 18327.5 1094.11 3
 4 -1 -7 18731 1034.03 2
 4 -1 -7 19046.1 1261.88 5
 4 1 -7 20412.7 1355.71 5
 -4 1 -7 17296.2 724.38 3
 -4 -1 -5 43732.8 1809.53 5
 4 1 -5 41363.4 1465.38 3
 4 -1 -5 44348 1655.42 5
 4 -1 -5 42418.1 1802.65 7
 -4 1 -5 40580.1 893.842 3
 -4 -1 -5 42470.3 1295 1
 -4 -1 -5 43949.5 1554.78 2
 4 -1 -5 42173.4 1284.36 2
 4 -1 -5 43763.4 1476.27 3
 -4 1 -5 44968.9 1876.49 5
 -4 -1 -5 40218.5 1470.58 8
 4 1 -5 41484.4 1698.56 5
[truncated: 1,645,997 more chars]
